# Supplementary material
Source: MDPI journal article supplement (https://www.mdpi.com/2071-1050/15/14/11401)
Supplement: s1 [file s1]

Archive with 5 entries (5 files):
- sustainability-2476081-supplementary Figures.pdf
- Table S1.xlsx
- Table S2.xls
- Table S3.xls
- Table S4.xls
