# Supplementary material
Source: MDPI journal article supplement (https://www.mdpi.com/2071-1050/15/14/11401)
Supplement: s1 [file s1 › Table S1.xlsx]

## Sheet: Sheet1
Table S1. Primers used for deletion , complementation and gene expression
PCR primers used for deletion and complementation
Primer name	Sequence(5'-3')
FpRtfA-1F	TGGTACAGGGAAACATCG
FpRtfA-2R	TTGACCTCCACTAGCTCCAGCCAAGCCCTTATTGGTCAGAGGGTATG
FpRtfA-7F	TACCAACGCTCCTCCACC
FpRtfA-3F	GAATAGAGTAGATGCCGACCGCGGGTTACGCTTGACTGTAACGACT
FpRtfA-4R	CATACGCAACACCACTAAAT
FpRtfA-8R	CAACAATGACGGCGGAAA
FpRtfA-5F	GCTCGTGACCGACCAGTA
FpRtfA-6R	TCTTGTTCGCTTTGTGCC
FpRtfA-CF	CGACTCACTATAGGGCGAATTGGGTACTCAAATTGGCAAGGCTCGACAATTCCT
FpRtfA-CR	CACCACCCCGGTGAACAGCTCCTCGCCCTTGCTCACAATTTCAACATCAATGTCCAG
FpPKS-1F	CTCACCTCATCGGCAGTA
FpPKS-2R	TTGACCTCCACTAGCTCCAGCCAAGCCGATTGGCGAGCTAGAACA
FpPKS-7F	CGTGGACAAGATGTTCGG
FpPKS-3F	GAATAGAGTAGATGCCGACCGCGGGTTGGTTTGGGCACCTTGGAT
FpPKS-4R	CCTTACCGCGAGCCTGAT
FpPKS-8R	CTCTTCGCTACCGTCCTG
FpPKS-5F	GTTTGCTTCCGTCTTTGG
FpPKS-6R	CACCGTCACTGCCTTGTA
FpPKS-CF	CGACTCACTATAGGGCGAATTGGGTACTCAAATTGGTAAATCTGAAGCCATTGGCC
FpPKS-CR	CACCACCCCGGTGAACAGCTCCTCGCCCTTGCTCACGACTCTTTTGCGAGTAAATC
HYG/F	GGCTTGGCTGGAGCTAGTGGAGGTCAA
HYG/R	GAACCCGCGGTCGGCATCTACTCTAT
H850	TTGTCCGTCAGGACATTGTT
H852	AACTCACCGCGACGTCTGTC
H855R	GCTGATCTGACCAGTTGC
H856F	GTCGATGCGACGCAATCGT
Primers used for SM genes expression
Primer name	Sequence(5'-3')
FPSE_02903Q-F	TCGCTCTGACACGGGATT
FPSE_02903Q-R	TGGTGGATGGGTCTACGC
FPSE_03736Q-F	TGGTGCTCCTTTCCTTCC
FPSE_03736Q-R	TCTCGGCATCCTTTGTCC
FPSE_07625Q-F	GCGGCTGTTGAGGGAATG
FPSE_07625Q-R	TGGGACGACCGAGAAGGA
FPSE_08240Q-F	ACCAGAACAGCGGAAAGG
FPSE_08240Q-R	AGAGGCGACGAAAGCAAT
FPSE_08625Q-F	CGTCATTGGTGGTCACTCTG
FPSE_08625Q-R	AATCGGAAACCGGCATAG
FPSE_08809Q-F	CGTCATTGGTGGTCACTCTG
FPSE_08809Q-R	AATCGGAAACCGGCATAG
FPSE_09212Q-F	CCAGCACAAATTCGTCGTT
FPSE_09212Q-R	TCGCCGTTGAGTAGGAGC
FPSE_09737Q-F	TAATCATTCTGGGCAAAGG
FPSE_09737Q-R	TGGAAGTAACTGACTGGGTAT
FPSE_10841Q-F	TCACTCCTGCTTGACGAT
FPSE_10841Q-R	AAGATGCTATGCGACACC
FPSE_11218Q-F	CCATAAGTGCTGTGCGATTT
FPSE_11218Q-R	CGTTCTTCTTGCTCCATTCT
FPSE_10112Q-F	TGGCTAAGTCGGGCAATT
FPSE_10112Q-R	CTGACCATACCAGGAGGC
FPSE_10113Q-F	GATTTCCCATTGCCTACC
FPSE_10113Q-R	AAAGAGTGCCCATTCCAT
FPSE_10114Q-F	GTGGACCAATGGAGAAACTG
FPSE_10114Q-R	ATGCGTGCTGGCTGACTA
FPSE_10115Q-F	TGTTCACCAGGCTACTTCG
FPSE_10115Q-R	CTGCCCGTACCACATCTC
FPSE_10116Q-F	TTGCCGATTTCATTTATTGC
FPSE_10116Q-R	AGAGCCTCGTTTGCCTTC
FPSE_10117Q-F	GGAATCTCGCTCTTCTACG
FPSE_10117Q-R	CAGCCACTCCTACCATAAA
FPSE_10118Q-F	CGACAAGATGCTGGAGGG
FPSE_10118Q-R	ACTGGAAGGCACGACGAA
FPSE_10119Q-F	TCGGTGTCTATGCTGGTCT
FPSE_10119Q-R	GCTCGGCACGCTTCTTAC
FPSE_10120Q-F	CAAGTCCCTGGCTGTCCT
FPSE_10120Q-R	CCTTCGGAGTTGACGGTAT
FPSE_10121Q-F	CCCTCTTCCTGGATTTGG
FPSE_10121Q-R	TTTCTCCTTGCCCGACAT
FPSE_10122Q-F	ATGCCATTCCCAGTGGTG
FPSE_10122Q-R	CGTCGGACTCGTGGTTGTA
FPSE_10123Q-F	AAGGTTATCCGCAAAGTC
FPSE_10123Q-R	TGATGGTGCTGGTAGAGTA
TRI5Q-F	ATACAGTTGGGCAAAGGTG
TRI5Q-R	TCAGCATAGCAGGATAAGGA
Fp-TUB-F	CTTACGGCGACCTGAACTACCTTG
Fp-TUB-R	AGCGAATCCGACCATGAAGAAGTG
