# Supplementary material
Source: MDPI journal article supplement (https://www.mdpi.com/2071-1050/15/14/11401)
Supplement: s1 [file s1 › Table S2.xls]

gene_id	RD1	RD2	RD3	WT1	WT2	WT3	FpRtfA	WT	log2FoldChange	pvalue	padj	gene_name	gene_chr	gene_start	gene_end	gene_strand	gene_length	gene_biotype	gene_description	tf_family
FPSE_08431	32003.5527246983	20633.1270114095	19650.4259670496	48.2653362179455	55.5882204092047	45.9290516347467	24095.7019010525	49.927536087299	8.91347121730954	0	0	-	Contig1572	3541	5258	+	1602	protein_coding	- && sp|Q4WYN6|CRMA_ASPFU Isocyanide synthase-NRPS hybrid crmA OS=Neosartorya fumigata (strain ATCC MYA-4609 / Af293 / CBS 101355 / FGSC A1100) OX=330879 GN=crmA PE=2 SV=2 && - && PF14510:ABC-transporter N-terminal|PF05141:Pyoverdine/dityrosine biosynthesis protein	-
FPSE_02339	13349.178493779	13097.9263292553	11533.0741407141	517.278494683634	471.541455884977	453.299770482065	12660.0596545828	480.706573683559	4.71944018283453	0	0	-	Contig1197	75251	79069	-	3537	protein_coding	- && - && - && PF00004:ATPase family associated with various cellular activities (AAA)	AAA
FPSE_08434	38431.2354039284	27468.541228886	26540.0020201711	329.463382009454	279.857937232548	226.649885241033	30813.2595509952	278.657068161011	6.78946642875734	2.65429429792221e-276	1.12090848201255e-272	-	Contig1572	11612	12685	-	1074	protein_coding	- && sp|Q9HDX3|YKN2_SCHPO AB hydrolase superfamily protein B1A11.02 OS=Schizosaccharomyces pombe (strain 972 / ATCC 24843) OX=284812 GN=SPAPB1A11.02 PE=3 SV=1 && - && PF07859:alpha/beta hydrolase fold	Abhydrolase_3
FPSE_10581	11816.025597266	13112.3450064121	11814.7108691003	1199.28868037199	1232.52502493512	1286.01344577291	12247.6938242595	1239.27571702668	3.30488150060841	1.47492166172455e-269	4.67144563309709e-266	-	Contig1633	29582	32518	-	2937	protein_coding	- && - && - && -	-
FPSE_12414	2426.47809613469	2338.70943483621	2350.31362300986	14759.7496647356	15194.7525235781	15427.1690610537	2371.83371799359	15127.2237497892	-2.67312277199184	6.03915168705882e-269	1.53020025446697e-265	-	Contig2192	9571	10377	+	753	protein_coding	- && - && - && -	-
FPSE_06765	83.1471808955471	90.3570435160722	86.1948706093169	5691.11268795949	4194.99380570843	4711.72162313847	86.5663650069788	4865.94270560213	-5.81219085201757	4.03937750383597e-261	8.52914559934964e-258	-	Contig1357	245881	246908	-	822	protein_coding	- && sp|Q460G9|ALCS_EMENI Protein alcS OS=Emericella nidulans (strain FGSC A4 / ATCC 38163 / CBS 112.46 / NRRL 194 / M139) OX=227321 GN=alcS PE=2 SV=1 && - && PF01184:GPR1/FUN34/yaaH family	-
FPSE_11402	6269.50023752644	6109.67413391654	4844.95354099347	14.6894501532878	25.877275018078	17.9722375962052	5741.37597081215	19.5129875891903	8.1915108162509	2.16647121642875e-253	3.92100340584798e-250	-	Contig2156	211253	212002	-	750	protein_coding	- && - && - && -	-
FPSE_04574	2194.27438363371	2047.45215626845	2003.52960869796	71.3487578873978	74.7565722744476	81.8735268271571	2081.75204953337	75.9929523296675	4.77504755875972	8.42165012696239e-245	1.33367356823108e-241	-	Contig1232	48533	49380	-	612	protein_coding	- && sp|Q0ZS46|GST_PLAVI Glutathione S-transferase OS=Plasmodium vivax OX=5855 GN=GST PE=2 SV=1 && - && PF14497:Glutathione S-transferase, C-terminal domain	-
FPSE_10969	1704.51720835872	1950.36639674586	1802.07415529711	16392.3771246296	17891.7396310178	17815.4797460605	1818.9859201339	17366.532167236	-3.25498246944021	2.42173683568152e-244	3.40899821902768e-241	-	Contig1664	18062	21604	-	3318	protein_coding	- && sp|Q4WY82|PPOC_ASPFU Linoleate 10R-lipoxygenase OS=Neosartorya fumigata (strain ATCC MYA-4609 / Af293 / CBS 101355 / FGSC A1100) OX=330879 GN=ppoC PE=1 SV=2 && - && PF00067:Cytochrome P450|PF03098:Animal haem peroxidase	An_peroxidase
FPSE_10859	32580.5130409125	21777.0087325172	19362.7756430395	160.534705246645	221.394464043556	167.740884231249	24573.4324721564	183.223351173817	7.06630792799506	2.53995320033948e-230	3.21786670951009e-227	-	Contig1656	17032	19116	-	1983	protein_coding	- && sp|Q9SGH6|DOX1_ARATH Alpha-dioxygenase 1 OS=Arabidopsis thaliana OX=3702 GN=DOX1 PE=1 SV=1 && - && PF03098:Animal haem peroxidase	An_peroxidase
FPSE_11403	3343.12506600755	2943.33263027886	2553.77360828534	49.3145826574661	46.0040444765832	60.905916298251	2946.74376819058	52.0748478107668	5.82295831977095	1.11253411334272e-216	1.28133588017627e-213	-	Contig2156	213160	214872	+	1713	protein_coding	- && - && - && PF17667:Fungal protein kinase	-
FPSE_08395	12252.0413019621	10366.0676306098	8115.34729446092	206.701548585549	171.556749193925	219.660681731397	10244.485409011	199.306326503624	5.68440603039475	1.34016914801351e-216	1.41488357801526e-213	-	Contig1570	110435	115506	-	4458	protein_coding	- && - && - && PF17109:fungal STAND N-terminal Goodbye domain	-
FPSE_01261	12.1678801310557	16.341167444396	16.0362549970822	3541.20673338187	3249.03564115869	2885.54259183517	14.8484341908446	3225.26165545858	-7.76034042957613	7.03904659591479e-209	6.85982164028034e-206	-	Contig0357	7137	9800	+	2508	protein_coding	- && - && - && PF13489:Methyltransferase domain|PF11899:Protein of unknown function (DUF3419)	-
FPSE_10577	2186.16246354634	2376.19799544394	2005.53414057259	37.77287182274	56.5466380024668	36.9429328366441	2189.29819985429	43.7541475539503	5.63931034205797	7.53118861981723e-200	6.81518775889032e-197	-	Contig1633	18770	19977	+	1158	protein_coding	- && sp|P04387|GAL80_YEAST Galactose/lactose metabolism regulatory protein GAL80 OS=Saccharomyces cerevisiae (strain ATCC 204508 / S288c) OX=559292 GN=GAL80 PE=1 SV=2 && - && PF01408:Oxidoreductase family, NAD-binding Rossmann fold	GFO_IDH_MocA
FPSE_01641	68.9513207426488	67.2871600651602	70.1586156122347	2713.35129260016	2995.05497894422	2173.6422914966	68.7990321400146	2627.34952101366	-5.2553364212215	6.80145415310841e-188	5.74450817771536e-185	-	Contig1190	429084	431424	-	1896	protein_coding	- && sp|Q8KRU5|PLD_STRCW Phospholipase D OS=Streptomyces chromofuscus OX=42881 GN=pld PE=1 SV=2 && - && PF09423:PhoD-like phosphatase|PF16655:PhoD-like phosphatase, N-terminal domain	-
FPSE_09921	2195.28837364463	1792.72219316462	2005.53414057259	107.023136831097	101.592264885788	108.831883221465	1997.84823579395	105.815761646116	4.23920295128708	4.22745501229163e-183	3.34735172192017e-180	-	Contig1603	58469	58921	-	453	protein_coding	- && - && - && PF12680:SnoaL-like domain	-
FPSE_02237	13343.0945537135	9385.59758394606	7812.66298139099	7.34472507664389	10.5425935258836	6.98920350963536	10180.4517063502	8.29217403738763	10.2553410020174	4.45183502537483e-182	3.31766458449845e-179	-	Contig1195	451904	452908	-	1005	protein_coding	- && sp|Q2I8V6|AFR_ENSAD 1,5-anhydro-D-fructose reductase OS=Ensifer adhaerens OX=106592 GN=afr PE=1 SV=1 && - && PF01408:Oxidoreductase family, NAD-binding Rossmann fold|PF02894:Oxidoreductase family, C-terminal alpha/beta domain	GFO_IDH_MocA
FPSE_03478	9557.86984294423	8510.86450309897	7638.26870829772	240.277434650207	294.23420113148	179.722375962052	8569.00101811364	238.07800391458	5.16890471501475	3.38904156984501e-179	2.38532042490924e-176	-	Contig1214	23631	24447	-	660	protein_coding	- && - && - && -	-
FPSE_10852	2667.80771873396	2591.51690765245	2620.92542608563	197.258330629864	138.970551023012	161.750138365847	2626.75001749068	165.993006672908	3.98679626172053	1.87445178553243e-176	1.24986471952159e-173	-	Contig1655	23906	24598	+	693	protein_coding	- && - && - && PF13417:Glutathione S-transferase, N-terminal domain	-
FPSE_11379	2677.94761884317	2440.60142007774	2380.38160112939	34.6251325041783	67.0892315283505	64.8997468751855	2499.64354668343	55.5380369692381	5.48563679568478	3.47236667495901e-173	2.19957067025279e-170	-	Contig2156	152729	155360	-	2055	protein_coding	- && - && - && -	-
FPSE_02450	5721.94563162893	5766.50961758423	4188.46935205041	6.29547863712333	9.58417593262149	8.98611879810261	5225.64153375452	8.28859112261581	9.2927562117747	1.02925486193799e-171	6.20934754566307e-169	GAOA	Contig1198	147448	149490	+	2043	protein_coding	- && sp|I1S2N3|GAOA_GIBZE Galactose oxidase OS=Gibberella zeae (strain ATCC MYA-4620 / CBS 123657 / FGSC 9075 / NRRL 31084 / PH-1) OX=229533 GN=GAOA PE=3 SV=1 && - && PF01344:Kelch motif|PF09118:Domain of unknown function (DUF1929)|PF00754:F5/8 type C domain	F5_F8_type_C
FPSE_02340	3233.61414482805	2771.26974954081	2466.57647173871	164.731691004727	170.598331600663	178.723918317819	2823.82012203586	171.351313641069	4.04232037046748	1.74693688691959e-164	1.00599742819928e-161	-	Contig1197	79585	81676	+	1938	protein_coding	- && - && - && -	-
FPSE_12052	24.3357602621114	17.302412588184	15.0339890597646	1550.78623761138	1975.29865971329	1859.12813356301	18.8907206366867	1795.07101029589	-6.57294502667961	1.80928234765916e-162	9.96599915760604e-160	-	Contig2170	60735	61023	-	216	protein_coding	- && - && - && -	-
FPSE_11375	3199.13848445672	3551.80080629667	2397.42012206379	11.5417108347261	23.9604398315537	26.9583563943078	3049.45313760573	20.8201690201959	7.18580655253788	5.25186484694867e-161	2.77232815608303e-158	-	Contig2156	144015	145002	+	816	protein_coding	- && - && - && -	-
FPSE_12179	4416.94048757321	5526.19833163723	4962.21865565963	48922.1644890854	45066.7120703728	53198.8217424117	4968.45249162335	49062.5661006233	-3.30369914758255	1.03340686715279e-159	5.23689263998345e-157	-	Contig2174	71000	73147	-	2148	protein_coding	- && - && - && -	-
FPSE_08091	154.126481660039	222.047628215029	173.392007155951	3010.28803498447	2773.66051490066	2870.56572717167	183.188705677006	2884.83809235227	-3.97552568888387	9.4904048557307e-159	4.62438227374047e-156	-	Contig1565	54455	56390	-	1716	protein_coding	- && - && - && -	-
FPSE_11486	18.2518201965835	14.41867715682	20.0453187463528	2803.58648639892	4237.16417981196	2715.80479231546	17.5719386999188	3252.18515284211	-7.5346379361795	5.60293184771235e-158	2.62902013254325e-155	-	Contig2156	434638	435395	-	492	protein_coding	- && - && - && -	-
FPSE_02182	130882.788639689	90818.4411850905	94979.731549906	5641.79810530202	4703.91354773063	4656.80645270562	105560.320458229	5000.83936857942	4.39979399589938	1.51161224962744e-154	6.83950556804643e-152	-	Contig1195	325074	325649	-	576	protein_coding	- && - && - && -	-
FPSE_11420	2760.0808097278	2700.1376089005	2520.69883235386	152.14073373048	196.475606618741	133.793324327306	2660.30575032739	160.803221558842	4.04646097341083	5.22135536738512e-154	2.28101210860007e-151	-	Contig2156	257341	259194	+	1518	protein_coding	- && - && - && PF09994:Uncharacterized alpha/beta hydrolase domain (DUF2235)	-
FPSE_05792	2191.23241360094	1641.80670558991	1742.94046499537	74.4964972059594	69.0060667148747	70.8904927405873	1858.65986139541	71.4643522204738	4.70158562847179	7.25785158660681e-154	3.06499072502406e-151	-	Contig1262	36298	39412	+	2640	protein_coding	- && - && - && PF00069:Protein kinase domain	Pkinase
FPSE_06943	15361.9486654578	13908.2559854686	13251.9602232138	2461.53214711522	2267.61602565825	2279.47880178536	14174.0549580467	2336.20899151961	2.60111069496407	3.67343736988734e-148	1.50125090448718e-145	-	Contig1360	179273	179908	+	636	protein_coding	- && - && - && -	-
FPSE_10430	4542.67524892745	3431.64516332317	3472.85147280562	180.470387597535	207.018200144624	227.648342885266	3815.72396168541	205.045643542475	4.21719146104055	1.5288262954508e-147	6.05271885533317e-145	-	Contig1627	3876	7115	-	3042	protein_coding	- && - && - && PF01926:50S ribosome-binding GTPase|PF09994:Uncharacterized alpha/beta hydrolase domain (DUF2235)	-
FPSE_08755	9.12591009829176	21.1473931633361	28.0634462448939	2543.37336939783	2845.54183439532	2023.87364486155	19.4455831688406	2470.92961621823	-6.98642783835875	9.66032593017038e-147	3.70868694573723e-144	-	Contig1577	90762	92336	-	1575	protein_coding	- && sp|P9WMY4|MGTA_MYCTO GDP-mannose-dependent alpha-mannosyltransferase OS=Mycobacterium tuberculosis (strain CDC 1551 / Oshkosh) OX=83331 GN=mgtA PE=3 SV=1 && - && PF00534:Glycosyl transferases group 1|PF13579:Glycosyl transferase 4-like domain	Glycos_transf_1
FPSE_12364	5055.75419445363	4919.652645907	4792.83571225295	1058.68965747624	1059.05144055468	989.471525435521	4922.74751753786	1035.73754115548	2.24881517684387	9.47430889559606e-146	3.53029468818548e-143	-	Contig2188	31021	31479	+	405	protein_coding	- && - && - && -	-
FPSE_09578	4121.86939439511	3370.12547412074	2547.76001266144	69.2502650083566	74.7565722744476	50.9213398559148	3346.58496039243	64.9760590462397	5.68614038995702	1.4042439538833e-143	5.08296190049928e-141	-	Contig1593	337672	338455	+	726	protein_coding	- && - && - && -	-
FPSE_01019	1122.48694208989	1087.16825762423	960.170767950298	46.1668433389044	37.3782861372238	43.9321363462794	1056.60865588814	42.4924219408026	4.63906849431222	3.50328679087091e-142	1.23286500982066e-139	-	Contig0348	221934	223479	-	1488	protein_coding	- && - && - && -	-
FPSE_06981	1969.16860120918	2046.49091112466	2158.88082898219	211.947780783152	158.138902888255	175.728545385118	2058.18011377201	181.938409685508	3.50206822514291	3.64810892933814e-142	1.24913221691311e-139	-	Contig1360	271303	272295	-	891	protein_coding	- && - && - && -	-
FPSE_12004	9125.91009829176	6289.4269758049	5304.99360622226	144.796008653837	153.346814921944	185.713121827454	6906.77689343964	161.285315134411	5.42004768264495	1.49375948807307e-140	4.98011551431521e-138	-	Contig2167	167264	171579	-	4218	protein_coding	- && sp|Q4WFQ4|ABCH_ASPFU ABC multidrug transporter H OS=Neosartorya fumigata (strain ATCC MYA-4609 / Af293 / CBS 101355 / FGSC A1100) OX=330879 GN=abcH PE=1 SV=2 && - && PF06422:CDR ABC transporter|PF00005:ABC transporter|PF01061:ABC-2 type transporter|PF19055:ABC-2 type transporter	ABC2_membrane
FPSE_11991	9402.72937127327	6424.96254107901	7855.76041669565	335.758860646578	239.604398315537	229.645258173733	7894.48410968264	268.336172378616	4.87976776082334	1.84323429193666e-140	5.98767570372961e-138	-	Contig2167	131172	131432	+	261	protein_coding	- && - && - && -	-
FPSE_06850	2331.16303510808	1919.60655214464	2123.80152117608	142.697515774796	130.344792683652	98.8473067791287	2124.85703614293	123.963205079192	4.10022939539617	1.90126202009312e-139	6.02177213313993e-137	-	Contig1359	21233	22037	+	705	protein_coding	- && - && - && PF00106:short chain dehydrogenase	adh_short
FPSE_05351	12848.2674283839	11103.3426558952	9042.44328647974	771.196133047608	645.015040265426	760.824724906021	10998.0177902529	725.678632739685	3.92204244466728	4.13318599947022e-139	1.2771544738363e-136	-	Contig1247	434167	435141	-	975	protein_coding	- && - && - && -	-
FPSE_05507	19866.0922939702	17506.1965586671	18401.6026091518	208.80004146459	354.614509506995	152.764019567744	18591.2971539297	238.726190179777	6.28202199162444	5.08090367749216e-139	1.53261830214639e-136	-	Contig1252	28162	28584	-	423	protein_coding	- && - && - && -	-
FPSE_11184	2077.66553237776	1755.23363255689	1693.82943406681	132.20505137959	151.42997973542	126.80412081767	1842.24286633382	136.813050644227	3.75002692809629	5.58482883564699e-139	1.64544643067004e-136	-	Contig1688	7561	9286	+	1563	protein_coding	- && - && - && -	-
FPSE_08114	2213.54019384121	1635.07798958339	1598.61417002163	16.7879430323289	25.877275018078	14.9768646635044	1815.74411781541	19.2140275713038	6.55536191153104	8.14726375610409e-139	2.34585646650188e-136	-	Contig1565	114747	115713	-	906	protein_coding	- && - && - && -	-
FPSE_11531	13051.0654305681	12740.3431357662	14099.8772061845	2631.51007031755	2837.87449364922	2575.02226447851	13297.0952575063	2681.4689428151	2.30991450336988	5.49684838342496e-136	1.54754604821357e-133	-	Contig2157	48720	50400	-	1383	protein_coding	- && sp|I1RCN9|VELB_GIBZE Velvet complex subunit B OS=Gibberella zeae (strain ATCC MYA-4620 / CBS 123657 / FGSC 9075 / NRRL 31084 / PH-1) OX=229533 GN=velB PE=3 SV=2 && - && PF11754:Velvet factor	-
FPSE_06293	200.770022162419	216.280157352301	188.425996215716	2154.1029403357	2756.40899822194	2299.44795467003	201.825391910145	2403.31996440923	-3.57361024154583	3.19145207187764e-133	8.78967528230822e-131	-	Contig1273	549574	550698	-	1125	protein_coding	- && - && - && -	-
FPSE_09637	1857.62970000783	2257.96484275802	2274.14141177372	176.273401839453	153.346814921944	188.708494760155	2129.91198484652	172.776237173851	3.62473098318993	6.02619799046636e-133	1.62438090087699e-130	-	Contig1595	77122	80803	-	3189	protein_coding	- && - && - && PF00082:Subtilase family	Peptidase_S8
FPSE_10049	1904.27324051021	1814.83083147175	1661.75692407265	12.5909572742467	38.336703730486	17.9722375962052	1793.6203320182	22.9666328669793	6.27218353453458	1.68176010773651e-132	4.43879558435704e-130	-	Contig1610	5641	6573	+	882	protein_coding	- && - && - && -	-
FPSE_02873	462.379444980116	452.746462724149	501.132968658819	2865.49202633064	3164.69489295162	3298.90405654789	472.086292121028	3109.69699194338	-2.71989299360734	2.33590214793133e-132	6.03949883921267e-130	-	Contig1203	163807	168417	-	4221	protein_coding	- && sp|Q4WY82|PPOC_ASPFU Linoleate 10R-lipoxygenase OS=Neosartorya fumigata (strain ATCC MYA-4609 / Af293 / CBS 101355 / FGSC A1100) OX=330879 GN=ppoC PE=1 SV=2 && - && PF03098:Animal haem peroxidase	An_peroxidase
FPSE_07846	5072.9920246393	5150.35148041612	3501.91718498783	196.209084190344	237.687563129013	213.669935865995	4575.08689668108	215.855527728451	4.40492831740365	1.25725715993048e-131	3.18563819183184e-129	-	Contig1559	123665	124456	-	792	protein_coding	- && sp|P09350|SR1A_PHYPO Spherulin-1A OS=Physarum polycephalum OX=5791 PE=1 SV=1 && - && PF00190:Cupin	-
FPSE_01875	9694.75849441861	6431.69125708552	5963.48232703995	259.163870561577	207.018200144624	202.686901779426	7363.31069284803	222.956324161876	5.04622442167865	2.65927308155192e-131	6.60594719023162e-129	-	Contig1192	103196	104527	-	1332	protein_coding	- && - && - && PF12051:Protein of unknown function (DUF3533)	-
FPSE_05462	923.74489994931	980.470046663762	832.882993910958	39.8713647017811	33.5446157641752	35.9444751924104	912.365980174677	36.4534852194556	4.64824221455785	3.40908418044718e-130	8.30570913117025e-128	-	Contig1250	115493	120067	-	4125	protein_coding	- && sp|F4HX15|LPAI_ARATH Phospholipase A I OS=Arabidopsis thaliana OX=3702 GN=PLA1 PE=3 SV=1 && - && PF01734:Patatin-like phospholipase	-
FPSE_03557	1440.87980551918	1390.92172306124	1402.17004630738	218.243259420275	201.267694585051	199.691528846725	1411.32385829593	206.400827617351	2.77427562806898	4.31099148087371e-130	1.03048964285262e-127	-	Contig1215	192383	193819	+	1437	protein_coding	- && sp|P16171|MERA_BACCE Mercuric reductase OS=Bacillus cereus OX=1396 GN=merA PE=1 SV=1 && - && PF07992:Pyridine nucleotide-disulphide oxidoreductase|PF02852:Pyridine nucleotide-disulphide oxidoreductase, dimerisation domain	Pyr_redox_2
FPSE_02125	1828.22398969112	1400.53417449912	1237.79843258728	23.0834216694522	24.9188574248159	24.9614411058406	1488.85219892584	24.3212400667029	5.93467065349785	1.00630565999644e-129	2.36090489009164e-127	-	Contig1195	195067	196047	+	981	protein_coding	- && - && - && PF12697:Alpha/beta hydrolase family	-
FPSE_00230	2647.52791851553	2876.0454702137	1868.22370716008	92.3336866778089	83.382330613807	76.881238605989	2463.93236529644	84.1990852992016	4.87191813106095	2.74538712566568e-129	6.323874453647e-127	-	Contig0335	49887	51078	+	1137	protein_coding	- && - && - && PF00199:Catalase	Catalase
FPSE_05464	26505.6988854829	19510.3926834651	18425.6569916475	850.93886245117	817.530207052613	1146.2293755802	21480.5828535318	938.232815027994	4.51694593020112	3.67947645951889e-129	8.32415844029373e-127	-	Contig1250	127103	127636	-	534	protein_coding	- && - && - && -	-
FPSE_05349	2446.75789635311	1861.93184351736	1625.67535032921	8.39397151616444	17.2515166787187	11.9814917308035	1978.12169673323	12.5423266418955	7.28966815998817	1.09916788110794e-128	2.44304524311518e-126	-	Contig1247	431240	432106	-	867	protein_coding	- && - && - && PF05705:Eukaryotic protein of unknown function (DUF829)	-
FPSE_05053	28268.0135244642	20316.8773591032	17675.9620705339	920.189127459527	1036.04941831638	791.776911877263	22086.9509847004	916.005152551058	4.59158985025301	2.3145769875791e-128	5.05575445786889e-126	-	Contig1244	27471	28709	+	1239	protein_coding	- && - && - && -	-
FPSE_03438	868.98943935956	897.802964297994	824.864866412417	58.7578006131511	53.6713852226804	46.9275092789803	863.88575668999	53.1188983716039	4.02511798145511	1.46575453540104e-127	3.14739732355861e-125	-	Contig1213	2369	3230	-	765	protein_coding	- && - && - && -	-
FPSE_06680	12557.2522952495	8808.85049767325	8234.61694100172	306.379960340002	332.570904861966	211.673020577528	9866.90657797481	283.541295259832	5.1208127179731	1.66521577543693e-127	3.51610310983508e-125	-	Contig1357	31031	32985	-	1851	protein_coding	- && sp|D4AYG1|KLDC1_ARTBC Kelch repeat-containing protein ARB_01230 OS=Arthroderma benhamiae (strain ATCC MYA-4681 / CBS 112371) OX=663331 GN=ARB_01230 PE=1 SV=1 && - && PF13854:Kelch motif	-
FPSE_10169	3226.5162147516	2504.04359956775	2486.62179048506	122.761833423905	160.055738074779	107.833425577231	2739.0605349348	130.216999025305	4.39304194044637	2.94908081676133e-126	6.12490243730316e-124	-	Contig1614	26030	27062	+	915	protein_coding	- && sp|P32573|SPS19_YEAST Peroxisomal 2,4-dienoyl-CoA reductase SPS19 [(3E)-enoyl-CoA-producing] OS=Saccharomyces cerevisiae (strain ATCC 204508 / S288c) OX=559292 GN=SPS19 PE=1 SV=4 && - && PF00106:short chain dehydrogenase	adh_short
novel.533	139.93062150714	145.148016711988	103.233391543717	1536.09678745809	1553.59491867794	1673.41501173555	129.437343254282	1587.70223929053	-3.6158768805786	5.01461040125205e-126	1.02467901892681e-123	-	Contig1571	12098	14160	+	1866	-	- && Q9P6J0.1 RecName: Full=Uncharacterized transporter C1683.12 && PF07690:Major Facilitator Superfamily	MFS_1
FPSE_02398	3993.0926630081	3149.0390910495	2842.42619823282	254.966884803495	245.35490387511	242.625207548771	3328.18598409681	247.648998742459	3.74850875919038	8.38620526815564e-125	1.6864259451153e-122	-	Contig1198	15969	18050	-	1863	protein_coding	- && - && - && -	-
FPSE_08556	117.622841266872	152.837977862292	109.246987167623	3015.53426718208	2311.7032349483	3304.89480241329	126.569268765596	2877.37743484789	-4.50547721601588	9.36340220580844e-125	1.85351472727167e-122	-	Contig1574	246539	247595	+	855	protein_coding	- && - && - && -	-
FPSE_00334	1261.40357358611	1539.91472034838	1438.25162005081	10153.5577952404	9681.93452713423	11467.2860440232	1413.18997132843	10434.2594554659	-2.88414141022776	7.27495202443679e-124	1.41794411073215e-121	-	Contig0336	118632	120311	+	1530	protein_coding	- && - && - && -	-
FPSE_11183	2531.9330572705	2191.63892783665	2326.25924051424	236.080448892125	284.650025198858	220.659139375631	2349.9437418738	247.129871155538	3.24816071948046	9.65303624076301e-124	1.85294418385192e-121	-	Contig1688	3870	6509	-	2349	protein_coding	- && - && - && -	-
FPSE_08920	3598.65054875972	3144.23286533056	2931.62786665409	281.198045791509	195.517189025478	231.642173462201	3224.83709358146	236.119136093063	3.77327535253288	3.18099990844404e-123	6.01493848359366e-121	-	Contig1583	804	3011	+	2208	protein_coding	- && - && - && PF06985:Heterokaryon incompatibility protein (HET)	-
FPSE_00229	5036.48838424613	5678.07506435573	3518.95570592223	200.406069948426	175.390419566973	147.771731346576	4744.50638484136	174.522740287325	4.76541603674271	7.38901999100588e-122	1.37663962155961e-119	-	Contig0335	45561	47850	-	2238	protein_coding	- && sp|Q76I22|LOX1_ORYSJ Linoleate 9S-lipoxygenase 1 OS=Oryza sativa subsp. japonica OX=39947 GN=Os03g0699700 PE=2 SV=2 && - && PF00305:Lipoxygenase	Lipoxygenase
FPSE_00951	113.566881223186	171.101635594264	201.455453400845	5687.96494864093	8315.23103914241	5654.26563929501	162.041323406099	6552.48720902612	-5.33721943128434	7.91406672230305e-122	1.45309146818634e-119	-	Contig0348	23403	27857	+	4401	protein_coding	- && sp|Q9RLB8|CESA_RUMFL Multidomain esterase OS=Ruminococcus flavefaciens OX=1265 GN=cesA PE=1 SV=1 && - && PF13517:Repeat domain in Vibrio, Colwellia, Bradyrhizobium and Shewanella|PF13472:GDSL-like Lipase/Acylhydrolase family	-
FPSE_11477	24299.2566217182	28660.4852071831	16446.1817654451	611.710674240484	680.476491216126	860.670489329383	23135.3078647821	717.619218261998	5.01063143507409	1.15383495046903e-121	2.08827642678459e-119	-	Contig2156	405325	407073	+	1524	protein_coding	- && sp|Q7RX33|EGT1_NEUCR Ergothioneine biosynthesis protein 1 OS=Neurospora crassa (strain ATCC 24698 / 74-OR23-1A / CBS 708.71 / DSM 1257 / FGSC 987) OX=367110 GN=egt-1 PE=1 SV=3 && - && PF12867:DinB superfamily|PF03781:Sulfatase-modifying factor enzyme 1	DUF323
FPSE_03516	286.95917309073	330.668329463073	297.672983383339	2558.06281955111	2881.96170293928	2338.38780279515	305.100161979047	2592.80410842851	-3.08677578487323	1.71824343031975e-121	3.06597549559449e-119	-	Contig1215	66472	67653	+	1116	protein_coding	- && - && - && -	-
FPSE_05791	2368.68066551217	1736.00872968113	1676.79091313241	36.7236253832194	61.3387259687776	37.9413904808777	1927.16010277524	45.3345806109582	5.40456767419781	3.72147072541281e-120	6.54823786392429e-118	-	Contig1262	33315	35230	+	1773	protein_coding	- && - && - && -	-
FPSE_10248	2005.67224160234	2188.75519240528	1885.26222809448	222.440245178358	180.182507533284	232.640631106434	2026.5632207007	211.754461272692	3.25983910015596	6.38245234081828e-120	1.10766148912092e-117	-	Contig1618	18876	20156	+	1281	protein_coding	- && sp|A0A084B9Z4|SAT6_STACB Probable trichothecene esterase SAT6 OS=Stachybotrys chartarum (strain CBS 109288 / IBT 7711) OX=1280523 GN=SAT6 PE=3 SV=1 && - && PF03583:Secretory lipase	-
FPSE_09786	4588.30479941891	3387.42788670892	3417.72684625315	310.576946098084	321.06989374282	317.509530866292	3797.81984412699	316.385456902399	3.58523565890066	7.69407675276193e-120	1.31724673487488e-117	-	Contig1599	77728	82534	-	4275	protein_coding	- && - && - && PF05729:NACHT domain	NACHT
FPSE_02497	1245.17973341136	1174.64156570894	1112.51519042258	122.761833423905	143.762638989322	133.793324327306	1177.44549651429	133.439265580178	3.13981660711002	3.97531535425651e-119	6.7151026964101e-117	-	Contig1198	305761	307596	+	1785	protein_coding	- && sp|M5EAX2|GMCH_MALS4 GMC oxidoreductase family protein Mala s 12 OS=Malassezia sympodialis (strain ATCC 42132) OX=1230383 GN=MSY001_2108 PE=1 SV=1 && - && PF00732:GMC oxidoreductase|PF05199:GMC oxidoreductase	-
FPSE_11908	31.4336903385605	34.6048251763681	48.1087649912467	1078.62533982713	968.001769194771	1251.06742822473	38.0490935020584	1099.23151241554	-4.85290516642113	4.34053871757134e-119	7.23556381748834e-117	-	Contig2164	31343	32206	-	864	protein_coding	- && - && - && PF00561:alpha/beta hydrolase fold	Abhydrolase_1
FPSE_07626	1220.84397314925	1670.64405990355	1126.54691354503	18865.4509825796	17847.6524217277	21733.4275420333	1339.34498219928	19482.1769821135	-3.86235879578945	4.15069358245019e-117	6.82923857091708e-115	NPS11	Contig1402	35249	38490	+	2985	protein_coding	- && sp|A8NVB7|N6235_COPC7 Adenylate-forming reductase 06235 OS=Coprinopsis cinerea (strain Okayama-7 / 130 / ATCC MYA-4618 / FGSC 9003) OX=240176 GN=CC1G_06235 PE=2 SV=3 && - && PF00501:AMP-binding enzyme	AMP-binding
FPSE_12141	4449.38816792269	4551.49575583619	4938.16427316401	20535.8513142963	22315.7952415159	23488.716080596	4646.3493989743	22113.4542121361	-2.25077254625429	2.75186056336424e-116	4.46965659964891e-114	-	Contig2173	49157	50107	-	951	protein_coding	- && - && - && -	-
FPSE_11909	44.6155604805375	55.7522183397041	54.1223606151525	1387.10379304617	1316.86577314219	1930.01862630359	51.4967131451314	1544.66273083065	-4.90556692300776	9.47876259918893e-116	1.52008156163449e-113	-	Contig2164	32677	33915	-	1185	protein_coding	- && sp|F1DBB3|MPAG_PENBR O-methyltransferase mpaG OS=Penicillium brevicompactum OX=5074 GN=mpaG PE=1 SV=1 && - && PF00891:O-methyltransferase domain	-
FPSE_05653	4599.45868953905	3863.24423288398	3917.85754897465	622.203138635689	526.17125870092	556.140907838128	4126.85349046589	568.171768391579	2.86114529249057	1.58362568292106e-115	2.50786922211587e-113	-	Contig1256	13354	14391	+	1038	protein_coding	- && - && - && -	-
FPSE_06374	5220.02057622289	3670.99520412638	3630.20722496449	168.928676762809	161.014155668041	105.836510288764	4173.74100177125	145.259780906538	4.84495354321279	2.57514188328297e-114	4.02771265670518e-112	-	Contig1312	46823	48467	-	1551	protein_coding	- && sp|A0A411KZY6|BUAB_ASPBU Glycosyltransferase buaB OS=Aspergillus burnettii OX=2508778 GN=buaB PE=3 SV=1 && - && PF00201:UDP-glucoronosyl and UDP-glucosyl transferase	UDPGT
FPSE_00587	3354.27895612768	2287.76344221545	2085.71541555801	39.8713647017811	66.1308139350883	39.9383057693449	2575.91927130038	48.6468281354048	5.72239984985661	1.10767877376087e-113	1.71136370546054e-111	-	Contig0340	184101	184511	+	411	protein_coding	- && - && - && PF01042:Endoribonuclease L-PSP	Ribonuc_L-PSP
FPSE_05543	4458.51407802098	4019.92719132143	2921.60520728092	249.720652605892	223.311299230081	218.662224087164	3800.01549220778	230.564725307712	4.04321793691973	2.32625608709092e-113	3.55076365871745e-111	-	Contig1252	114377	114757	+	381	protein_coding	- && - && - && PF14087:Domain of unknown function (DUF4267)	-
FPSE_09561	3777.11279068187	2883.73543136401	2597.87330952732	132.20505137959	138.970551023012	88.8627303367925	3086.2405105244	120.012777579798	4.6844112573214	2.42953668125427e-113	3.66426193033457e-111	-	Contig1593	293910	295636	+	1674	protein_coding	- && - && - && -	-
FPSE_09638	1197.52220289806	1587.97697753778	1677.79317906973	75.54574364548	86.2575833935934	81.8735268271571	1487.76411983519	81.2256179554102	4.19399105359526	3.29208903909829e-113	4.9067618866278e-111	-	Contig1595	81639	83174	-	1536	protein_coding	- && - && - && -	-
FPSE_08756	2475.14961665891	2789.53340727278	2598.87557546464	11747.3631368721	11938.0495416733	13180.6393615281	2621.18619979878	12288.6840133578	-2.22896142448226	5.88591559386055e-112	8.67077496030458e-110	-	Contig1577	96989	99049	+	1815	protein_coding	- && sp|Q75GS4|UGDH1_ORYSJ UDP-glucose 6-dehydrogenase 1 OS=Oryza sativa subsp. japonica OX=39947 GN=UGD1 PE=3 SV=1 && - && PF03720:UDP-glucose/GDP-mannose dehydrogenase family, UDP binding domain|PF00984:UDP-glucose/GDP-mannose dehydrogenase family, central domain|PF03721:UDP-glucose/GDP-mannose dehydrogenase family, NAD binding domain	-
FPSE_10446	1897.17531043376	2031.11098882405	1344.03862194295	51.4130755365072	33.5446157641752	27.9568140385415	1757.44164040026	37.638168446408	5.55027098978087	2.17806982651408e-111	3.17172030254102e-109	-	Contig1627	56502	57693	+	990	protein_coding	- && - && - && -	-
FPSE_05460	2413.29622599271	1860.97059837357	2265.12101833786	67.1517721293155	96.8001769194771	48.9244245674476	2179.79594756805	70.9587912054134	4.93818117709517	2.66639797812218e-111	3.83870408918522e-109	-	Contig1250	110942	111817	-	876	protein_coding	- && sp|Q02IV5|HCHA_PSEAB Protein/nucleic acid deglycase HchA OS=Pseudomonas aeruginosa (strain UCBPP-PA14) OX=208963 GN=hchA PE=3 SV=1 && - && -	-
FPSE_10726	36.503640393167	17.302412588184	9.02039343585875	2181.38334776323	1976.25707730655	1710.3579445722	20.9421488057366	1955.99945654733	-6.54958339458243	7.6391309807353e-111	1.08741742016781e-108	-	Contig1645	97317	99367	-	1941	protein_coding	- && - && - && PF13632:Glycosyl transferase family group 2	-
FPSE_09215	1786.65039924334	1668.72156961597	1682.80450875632	178.371894718494	213.727123297459	238.631376971836	1712.72549253854	210.24346499593	3.02489247439268	4.77917957649165e-110	6.72749178384142e-108	-	Contig1588	356027	359560	+	3090	protein_coding	- && sp|Q9FIY7|SM3L3_ARATH DNA repair protein RAD5B OS=Arabidopsis thaliana OX=3702 GN=RAD5B PE=3 SV=1 && - && PF00271:Helicase conserved C-terminal domain|PF00176:SNF2 family N-terminal domain	SNF2_N
FPSE_11310	725.002857808734	877.616816278446	883.998556714157	4963.98490537175	4705.83038291715	5143.05532544739	828.872743600446	4937.6235379121	-2.57435086602067	4.94203849632554e-109	6.88029513296135e-107	-	Contig2155	77257	78866	-	1503	protein_coding	- && sp|O74851|ADG3_SCHPO Probable secreted beta-glucosidase adg3 OS=Schizosaccharomyces pombe (strain 972 / ATCC 24843) OX=284812 GN=adg3 PE=2 SV=1 && - && PF03856:Beta-glucosidase (SUN family)	-
FPSE_04004	91.2591009829176	132.651829842744	142.321763099105	1759.58627907597	2147.81382650048	2212.58213962171	122.077564641589	2039.99408173272	-4.06188804624035	1.61021208934571e-108	2.21736706086096e-106	-	Contig1220	206436	207724	-	1083	protein_coding	- && - && - && -	-
FPSE_07234	260.595432806776	342.203271188529	347.786280249221	2462.58139355474	2527.34719343229	2518.1101787572	316.861661414842	2502.67958858141	-2.98100605893392	2.62068370766869e-108	3.5700475153177e-106	-	Contig1364	266371	268791	-	2091	protein_coding	- && - && - && PF00520:Ion transport protein	Ion_trans
FPSE_03038	1076.85739159843	1102.54817992484	1048.37017043425	72.3980043269183	53.6713852226804	37.9413904808777	1075.92524731917	54.6702600101588	4.30282981418545	3.65995354195579e-108	4.93276078968488e-106	-	Contig1205	317072	318071	-	951	protein_coding	- && sp|Q9LL41|PCBER_PINTA Phenylcoumaran benzylic ether reductase PT1 OS=Pinus taeda OX=3352 GN=PCBER PE=1 SV=1 && - && PF05368:NmrA-like family	NmrA
FPSE_11479	10141.9280892349	12480.8069469434	8008.10483916793	682.010185688361	778.235085728865	769.810843704124	10210.2799584488	743.352038373783	3.77967408330608	1.33643154490025e-107	1.78223697287803e-105	-	Contig2156	410486	413211	+	1710	protein_coding	- && - && - && -	-
FPSE_10435	37320.9163419696	36750.3243373029	25717.1416856333	2892.77243375817	3084.1878151176	3071.25571366263	33262.7941216353	3016.0719875128	3.46314222059996	1.44197675478131e-107	1.90295869857546e-105	-	Contig1627	22751	25552	-	2802	protein_coding	- && sp|P46468|CDAT_PLAF7 Putative cell division cycle ATPase OS=Plasmodium falciparum (isolate 3D7) OX=36329 GN=PF07_0047 PE=3 SV=2 && - && PF00004:ATPase family associated with various cellular activities (AAA)	AAA
FPSE_11388	587.100216323436	829.554559089046	703.590687996982	6687.89680550402	7375.02338015224	8283.20461656214	706.748487803155	7448.70826740613	-3.39739198710508	2.61727587919812e-107	3.41837815603722e-105	-	Contig2156	178963	179751	+	789	protein_coding	- && - && - && PF13302:Acetyltransferase (GNAT) domain	-
FPSE_08948	4595.40272949536	3920.91894151126	3211.26006316571	215.095520101714	219.477628857032	143.777900769642	3909.19391139078	192.783683242796	4.34182669445528	5.05161556204778e-107	6.53050179138605e-105	-	Contig1583	68616	70110	-	1398	protein_coding	- && sp|P08159|HDNO_PSEOX 6-hydroxy-D-nicotine oxidase OS=Pseudarthrobacter oxydans OX=1671 PE=1 SV=2 && - && PF08031:Berberine and berberine like|PF01565:FAD binding domain	FAD_binding_4
FPSE_08349	1286.75332385914	1136.19175995742	1377.11339787444	140.599022895754	116.926946377982	135.790239615773	1266.68616056366	131.10540296317	3.27364169526484	8.35872430714195e-107	1.0696634166382e-104	-	Contig1569	33490	34629	-	1140	protein_coding	- && - && - && PF00107:Zinc-binding dehydrogenase	ADH_zinc_N
FPSE_10873	32.4476803494818	66.3259149213722	82.1858068600464	2424.808521732	2530.22244621207	3022.33128909518	60.3198007103001	2659.12075234642	-5.46075378289698	1.01115826950946e-106	1.28103641164153e-104	-	Contig1656	50609	52929	-	1929	protein_coding	- && - && - && PF05686:Glycosyl transferase family 90	-
FPSE_00765	1462.17359574852	1598.55067411945	1373.10433412516	143.746762214316	186.891430686119	157.756307788913	1477.94286799771	162.798166896449	3.18057048768259	1.74686661929846e-106	2.19119338612794e-104	-	Contig0344	37214	40176	-	2823	protein_coding	- && sp|Q6ZFZ4|DEK1_ORYSJ Calpain-type cysteine protease ADL1 OS=Oryza sativa subsp. japonica OX=39947 GN=ADL1 PE=1 SV=1 && - && PF00648:Calpain family cysteine protease	Peptidase_C2
FPSE_10392	12414.2797037096	8112.90901357074	7304.51415117095	291.690510186714	343.113498387849	217.66376644293	9277.23428948375	284.155925005831	5.02863192797951	5.3047513788533e-105	6.58881325673455e-103	-	Contig1626	26116	27999	-	1707	protein_coding	- && sp|D7PI13|GSFJ_PENAE Probable efflux pump gsfJ OS=Penicillium aethiopicum OX=36650 GN=gsfJ PE=1 SV=1 && - && PF07690:Major Facilitator Superfamily	MFS_1
FPSE_11078	972.416420473533	1402.4566647867	1227.77577321411	29.3789003065755	47.9208796631075	37.9413904808777	1200.88295282478	38.4137234835202	4.96104665890222	5.69567140151528e-105	7.00567582386379e-103	-	Contig1673	11877	14226	+	2262	protein_coding	- && sp|Q6TN15|MX_SINCH Interferon-induced GTP-binding protein Mx OS=Siniperca chuatsi OX=119488 GN=mx PE=2 SV=1 && - && PF01031:Dynamin central region|PF00350:Dynamin family	-
FPSE_03434	8151.46569779638	10059.4304297414	6887.57152124681	664.172996216511	492.626642936745	616.048366492146	8366.15588292821	590.949335215134	3.82393896693491	5.77939122205168e-105	7.04029878770892e-103	TOX4	Contig1212	169300	170121	+	822	protein_coding	- && sp|Q90121|KP4T_UMV4 KP4 killer toxin OS=Ustilago maydis P4 virus OX=11009 GN=M2A PE=1 SV=1 && - && PF09044:Kp4	-
FPSE_07312	12695.1549367348	17751.314070333	10081.7930634781	394.516661259729	572.175303177503	511.210313847615	13509.420690182	492.634092761616	4.77686822066813	1.46107737216862e-104	1.76289421219088e-102	-	Contig1365	12878	13270	+	333	protein_coding	- && - && - && -	-
FPSE_07563	830.45781894455	942.020240912242	765.731176110676	57.7085541736305	57.505055595729	45.9290516347467	846.069745322489	53.7142204680354	3.97779232958778	1.66569947398823e-104	1.99082515433555e-102	-	Contig1372	32512	33003	+	492	protein_coding	- && - && - && -	-
FPSE_03040	20907.4600351864	20119.8221046267	15310.6144584642	2095.34513972255	2162.19009039941	1829.174404236	18779.2988660924	2028.90321145265	3.21035925883154	2.94123196780107e-104	3.48247362617493e-102	-	Contig1205	319958	322114	-	2157	protein_coding	- && - && - && PF00004:ATPase family associated with various cellular activities (AAA)	AAA
FPSE_10655	4417.95447758413	4023.77217189658	3603.14604465691	708.241346676375	727.438953285971	722.883334425143	4014.95756471254	719.521211462496	2.48017834412708	3.19659040899761e-104	3.74977813811026e-102	-	Contig1640	1397	4469	-	2925	protein_coding	- && sp|Q2H334|NM111_CHAGB Pro-apoptotic serine protease NMA111 OS=Chaetomium globosum (strain ATCC 6205 / CBS 148.51 / DSM 1962 / NBRC 6347 / NRRL 1970) OX=306901 GN=NMA111 PE=3 SV=1 && - && PF13365:Trypsin-like peptidase domain|PF12812:PDZ-like domain	-
FPSE_05291	1139.72477227555	1212.13012631667	1537.47594784526	15831.0302794861	14809.4686510867	12013.442375419	1296.44361547916	14217.9804353306	-3.45510246344216	3.61376475795352e-104	4.2002555705058e-102	-	Contig1247	271036	272568	-	1533	protein_coding	- && sp|Q9GUC9|YFEF9_CAEEL Uncharacterized protein F14F9.5 OS=Caenorhabditis elegans OX=6239 GN=F14F9.5 PE=1 SV=2 && - && PF03372:Endonuclease/Exonuclease/phosphatase family	Exo_endo_phos
FPSE_11481	20606.3050019428	25305.739655363	16120.4453358169	824.707701463156	920.080889531663	1231.09827534006	20677.4966643742	991.962288778293	4.3815479803349	3.69659524625866e-104	4.25746956135009e-102	NPS16	Contig2156	416191	421205	+	4950	protein_coding	- && sp|Q4WD47|FSQF_ASPFU Nonribosomal peptide synthetase-like enzyme fsqF OS=Neosartorya fumigata (strain ATCC MYA-4609 / Af293 / CBS 101355 / FGSC A1100) OX=330879 GN=fsqF PE=2 SV=1 && - && PF07993:Male sterility protein|PF00501:AMP-binding enzyme|PF00550:Phosphopantetheine attachment site|PF00266:Aminotransferase class-V	AMP-binding
FPSE_08097	2970.99073199943	3176.91520021935	2262.11422052591	268.607088517262	239.604398315537	245.620580481471	2803.3400509149	251.277355771424	3.48034235587711	1.1756468179424e-103	1.34182608437047e-101	-	Contig1565	72200	73219	+	918	protein_coding	- && sp|Q5ZID0|NMRL1_CHICK NmrA-like family domain-containing protein 1 OS=Gallus gallus OX=9031 GN=NMRAL1 PE=2 SV=1 && - && PF05368:NmrA-like family	NmrA
FPSE_06880	1208.6760930182	1142.92047596393	1252.83242164705	4972.37887688791	5398.76630284569	5656.26255458348	1201.47633020973	5342.46924477236	-2.15286129866995	1.85366188290455e-103	2.09678949951051e-101	-	Contig1360	8262	11453	-	3192	protein_coding	- && - && - && PF12796:Ankyrin repeats (3 copies)	-
FPSE_07340	1271.54347369532	1156.37790797697	1007.27726700423	82.8904687221239	53.6713852226804	61.9043739424847	1145.0662162255	66.155409295763	4.11785385761617	1.9386990119192e-103	2.17357325504463e-101	-	Contig1365	74734	76653	+	1647	protein_coding	- && sp|Q95YH0|CDK8_DICDI Probable cyclin-dependent kinase 8 OS=Dictyostelium discoideum OX=44689 GN=cdk8 PE=2 SV=1 && - && PF00069:Protein kinase domain	Pkinase
FPSE_04476	1009.93405087762	915.105376886178	756.710782674817	12.5909572742467	11.5010111191458	15.975322307738	893.916736812872	13.3557635670435	6.06572780868315	2.8151334837855e-103	3.12850229000689e-101	-	Contig1229	26288	27356	+	996	protein_coding	- && - && - && PF04548:AIG1 family	-
FPSE_06085	1185.35432276701	1116.96685708166	1268.86867664413	173.125662520892	170.598331600663	185.713121827454	1190.39661883093	176.479038649669	2.75384508082	7.24255482317637e-103	7.97877626563665e-101	-	Contig1269	57920	58774	-	804	protein_coding	- && - && - && PF04248:Domain of unknown function (DUF427)	-
FPSE_05323	2956.79487184653	2227.2049981568	1984.48655588892	148.992994411919	171.556749193925	162.748596010081	2389.49547529742	161.099446538641	3.88990859452919	2.72945747221205e-102	2.98099109615987e-100	-	Contig1247	378092	379794	+	1542	protein_coding	- && sp|I1RJD6|C9MT1_GIBZE Sphingolipid C9-methyltransferase 1 OS=Gibberella zeae (strain ATCC MYA-4620 / CBS 123657 / FGSC 9075 / NRRL 31084 / PH-1) OX=229533 GN=MT1 PE=3 SV=1 && - && PF02353:Mycolic acid cyclopropane synthetase	-
FPSE_11931	425.875804586949	429.676579273237	452.021937730255	1944.25365243159	1845.9122846229	1907.05410048622	435.858107196814	1899.0733458469	-2.12331415478317	3.22241499049606e-102	3.48929705252945e-100	-	Contig2164	86113	87967	+	1629	protein_coding	- && sp|O42916|ALE1_SCHPO Lysophospholipid acyltransferase OS=Schizosaccharomyces pombe (strain 972 / ATCC 24843) OX=284812 GN=ale1 PE=1 SV=1 && - && PF03062:MBOAT, membrane-bound O-acyltransferase family	MBOAT
FPSE_01893	1360.77459465639	1384.19300705472	1067.41322324329	104.924643952056	111.176440818409	113.824171442633	1270.79360831813	109.975085404366	3.53004495615451	3.41527823084585e-102	3.66679321242255e-100	-	Contig1192	137427	138545	+	1071	protein_coding	- && - && - && PF02958:Ecdysteroid kinase	-
FPSE_09790	177.448251911229	203.783970483056	211.478112774022	1255.9479881061	1381.07975189076	1285.01498812867	197.570111722769	1307.34757604185	-2.72593332483645	1.72954208393015e-101	1.84130829086648e-99	-	Contig1599	93440	93904	+	411	protein_coding	- && - && - && -	-
FPSE_11372	771.646398311114	693.05774867115	663.500050504277	36.7236253832194	45.045626883321	30.9521869712423	709.40139916218	37.5738130792609	4.23580880521871	2.13899157833152e-101	2.2582403588235e-99	-	Contig2156	135920	138166	-	1842	protein_coding	- && sp|M5EAX2|GMCH_MALS4 GMC oxidoreductase family protein Mala s 12 OS=Malassezia sympodialis (strain ATCC 42132) OX=1230383 GN=MSY001_2108 PE=1 SV=1 && - && PF05199:GMC oxidoreductase|PF00732:GMC oxidoreductase	-
FPSE_07447	2038.11992195183	1819.63705719069	1434.24255630154	111.220122589179	126.511122310604	92.856560913727	1763.99984514802	110.19593527117	3.9998818479957	3.76555749367498e-101	3.9426320568073e-99	-	Contig1366	146177	149347	-	3171	protein_coding	- && sp|E9PYK3|PARP4_MOUSE Protein mono-ADP-ribosyltransferase PARP4 OS=Mus musculus OX=10090 GN=Parp4 PE=1 SV=1 && - && PF08487:Vault protein inter-alpha-trypsin domain|PF13768:von Willebrand factor type A domain	-
FPSE_02856	1878.92349023718	1620.65931242657	1341.031824131	97.5799188754116	121.719034344293	90.8596456252597	1613.53820893158	103.386199614988	3.962502852547	5.20556650124382e-101	5.40568213149655e-99	-	Contig1203	127225	128870	+	1494	protein_coding	- && sp|A5UMN6|DADD_METS3 5'-deoxyadenosine deaminase OS=Methanobrevibacter smithii (strain ATCC 35061 / DSM 861 / OCM 144 / PS) OX=420247 GN=dadD PE=3 SV=1 && - && PF01979:Amidohydrolase family	Amidohydro_1
FPSE_04968	1607.17416731027	1664.87658904082	1356.06581319077	202.504562827467	194.558771432216	176.727003029351	1542.70552318062	191.263445763012	3.01223924768409	6.44422037188568e-101	6.63754698304225e-99	-	Contig1241	216597	219665	-	3021	protein_coding	- && sp|Q9MAG3|AB24G_ARATH ABC transporter G family member 24 OS=Arabidopsis thaliana OX=3702 GN=ABCG24 PE=2 SV=2 && - && PF00005:ABC transporter|PF01061:ABC-2 type transporter|PF19055:ABC-2 type transporter	ABC_tran
FPSE_08081	41269.3934444972	45933.0991959097	24807.0842145489	1654.66163512392	1724.19325027861	1768.26848793775	37336.5256183186	1715.70779111342	4.4436970652994	1.53796733243011e-100	1.57133130117395e-98	-	Contig1565	26156	26541	-	291	protein_coding	- && - && - && -	-
FPSE_00755	1592.97830715737	1175.60281085273	1095.47666948818	69.2502650083566	70.922901901399	70.8904927405873	1288.01926249943	70.354553216781	4.19404014088539	4.02239759422784e-99	4.0767804097018e-97	-	Contig0343	219071	223129	-	3669	protein_coding	- && - && - && PF12796:Ankyrin repeats (3 copies)	-
FPSE_01834	2937.52906163902	3571.02570917243	3441.78122874877	15837.3257581233	16231.7603594878	17158.4946161548	3316.77866652007	16409.1935779219	-2.30657977880031	6.07745862879891e-99	6.11073994986138e-97	-	Contig1191	198964	199684	-	609	protein_coding	- && - && - && -	-
FPSE_00353	26309.9988133751	20610.0571279586	17624.8465077307	2078.55719669022	1732.81900861797	1698.37645284139	21514.9674830215	1836.58421938319	3.55035213815247	6.63693818038987e-99	6.62073778010702e-97	-	Contig0337	62044	64948	+	2709	protein_coding	- && sp|P35750|CAN1_PIG Calpain-1 catalytic subunit OS=Sus scrofa OX=9823 GN=CAPN1 PE=2 SV=3 && - && PF00648:Calpain family cysteine protease	Peptidase_C2
FPSE_11478	9105.63029807333	12141.4874111863	7133.12667588963	585.47951325247	604.761501348416	609.05916298251	9460.08146171641	599.766725861132	3.97935677606088	9.50753806854328e-99	9.41023435862303e-97	-	Contig2156	408094	409688	+	1524	protein_coding	- && sp|Q4WD43|FSQB_ASPFU Amino acid oxidase fsqB OS=Neosartorya fumigata (strain ATCC MYA-4609 / Af293 / CBS 101355 / FGSC A1100) OX=330879 GN=fsqB PE=1 SV=1 && - && PF01266:FAD dependent oxidoreductase	DAO
FPSE_01845	158.182441703724	169.179145306688	143.324029036422	2456.28591491762	1697.35755766727	1943.99703332287	156.895205348945	2032.54683530258	-3.69482179965065	1.85460020819919e-98	1.82138992540121e-96	-	Contig1192	18705	20115	-	1170	protein_coding	- && - && - && -	-
FPSE_07526	2276.40757451833	2953.90632686053	1385.13152537298	10.4924643952056	18.2099342719808	20.9676105289061	2205.14847558395	16.5566697320308	7.05159933103255	8.73531416423879e-98	8.5128996266724e-96	-	Contig1370	36009	36506	-	450	protein_coding	- && - && - && -	-
FPSE_03988	578.988296236066	597.894479436137	586.325573330819	24.1326681089728	14.3762638989322	20.9676105289061	587.736116334341	19.825514178937	4.89824624770008	9.14437289698076e-98	8.84351604823277e-96	-	Contig1220	169960	170349	-	390	protein_coding	- && - && - && PF14248:Domain of unknown function (DUF4345)	-
FPSE_03309	7025.93678567373	4352.51801107207	4233.57131922971	204.603055706508	150.471562142157	215.666851154463	5204.00870532517	190.247156334376	4.77442156203106	1.96202891358773e-97	1.88310184138204e-95	-	Contig1209	112862	114217	-	1254	protein_coding	- && sp|A1A653|FER8_USTMA Fe-regulated protein 8 OS=Ustilago maydis (strain 521 / FGSC 9021) OX=237631 GN=fer8 PE=2 SV=1 && - && PF07992:Pyridine nucleotide-disulphide oxidoreductase	Pyr_redox_2
FPSE_08262	14.1958601528983	33.6435800325801	31.0702440568468	778.540858124252	806.98761352673	921.576405627634	26.3032280807751	835.701625759539	-4.98452878237677	2.862493955162e-97	2.72668691112387e-95	-	Contig1566	195599	196722	-	903	protein_coding	- && - && - && -	-
FPSE_07350	7114.15391662389	9458.65221487394	9005.35944679898	66313.4242241386	83622.8934297158	84723.1249437999	8526.05519276561	78219.8141992181	-3.19756626821296	3.75324066565456e-97	3.54849298456549e-95	-	Contig1365	97002	97318	-	267	protein_coding	- && - && - && -	-
FPSE_08407	1573.71249694987	1630.27176386445	1180.66927416018	101.776904633494	115.96852878472	117.818002019568	1461.55117832483	111.85447847926	3.70691090765623	4.87428926337715e-97	4.57424967983149e-95	-	Contig1571	15596	16977	-	1335	protein_coding	- && sp|O87393|GLNA3_RHIME Glutamine synthetase OS=Rhizobium meliloti (strain 1021) OX=266834 GN=glnT PE=1 SV=1 && - && PF00120:Glutamine synthetase, catalytic domain	-
FPSE_08472	8536.78190194648	12937.3983902427	10094.8225206633	515.180001804593	334.48774004849	551.14861961696	10523.0009376175	466.938787156681	4.49468277103005	7.2509971108434e-97	6.75462370568199e-95	-	Contig1573	78114	79830	-	1614	protein_coding	- && sp|D7PI20|GSFF_PENAE Cytochrome P450 monooxygenase gsfF OS=Penicillium aethiopicum OX=36650 GN=gsfF PE=1 SV=2 && - && PF00067:Cytochrome P450	p450
FPSE_04704	1371.92848477653	1165.99035941485	939.123183266627	64.0040328107539	69.0060667148747	56.9120857213165	1159.01400915267	63.3073950823151	4.19369353301407	8.59191678933749e-97	7.94532801489903e-95	-	Contig1235	88958	90706	+	1638	protein_coding	- && sp|M5EAX2|GMCH_MALS4 GMC oxidoreductase family protein Mala s 12 OS=Malassezia sympodialis (strain ATCC 42132) OX=1230383 GN=MSY001_2108 PE=1 SV=1 && - && PF05199:GMC oxidoreductase|PF00732:GMC oxidoreductase	-
FPSE_05641	2122.28109285829	1862.89308866115	1494.3785125406	125.909572742467	82.4239130205448	92.856560913727	1826.51756468668	100.396682225579	4.1881389717849	2.25660617385955e-96	2.07166258091497e-94	-	Contig1254	2620	3591	+	921	protein_coding	- && sp|A6SSW9|BOA17_BOTFB Oxidoreductase BOA17 OS=Botryotinia fuckeliana (strain B05.10) OX=332648 GN=BOA17 PE=2 SV=1 && - && PF00106:short chain dehydrogenase	adh_short
FPSE_05472	2063.46967222486	1587.01573239399	1641.71160532629	78.6934829640416	35.4614509506995	50.9213398559148	1764.06566998171	55.0254245902187	5.00886368850969	3.56686921133383e-96	3.25098316822937e-94	-	Contig1251	4923	6482	-	1500	protein_coding	- && - && - && -	-
FPSE_05495	3079.48766316801	1840.78445035402	1863.21237747349	31.4773931856167	37.3782861372238	13.9784070192707	2261.16149699851	27.6113621140371	6.35410235701631	1.32449749102774e-94	1.19857562241646e-92	-	Contig1251	61994	63712	-	1719	protein_coding	- && sp|Q9FKV0|BBE24_ARATH Berberine bridge enzyme-like 24 OS=Arabidopsis thaliana OX=3702 GN=At5g44380 PE=2 SV=1 && - && PF01565:FAD binding domain	FAD_binding_4
FPSE_09530	913.604999840097	838.205765383138	853.930578594628	5.24623219760278	21.0851870517673	5.99074586540174	868.580447939288	10.7740550382573	6.30787538007158	1.35453900609767e-94	1.21706770696818e-92	-	Contig1593	212205	213429	+	1062	protein_coding	- && sp|Q06466|TDA6_YEAST Putative vacuolar protein sorting-associated protein TDA6 OS=Saccharomyces cerevisiae (strain ATCC 204508 / S288c) OX=559292 GN=TDA6 PE=2 SV=1 && - && PF06101:Vacuolar protein sorting-associated protein 62	-
FPSE_02217	1466.22955579221	1343.82071101563	1281.89813382926	240.277434650207	230.020222382916	248.615953414172	1363.98280021237	239.637870149098	2.5091251730066	1.41852399047292e-94	1.26558312924658e-92	-	Contig1195	407678	409031	-	1206	protein_coding	- && sp|A0A1C3YKE0|FGM3_GIBZE Aminotransferase-like protein FGM3 OS=Gibberella zeae (strain ATCC MYA-4620 / CBS 123657 / FGSC 9075 / NRRL 31084 / PH-1) OX=229533 GN=FGM3 PE=2 SV=1 && - && PF00266:Aminotransferase class-V	Aminotran_5
FPSE_00550	580.002286246987	682.484052089482	864.955503905122	7696.22263388327	10620.2253509379	9653.08850445067	709.147280747197	9323.17882975727	-3.71668081348879	8.25220302138166e-94	7.31099021523666e-92	-	Contig0340	88887	90160	-	1134	protein_coding	- && sp|D4B388|FLA_ARTBC Fasciclin-like arabinogalactan protein ARB_02922 OS=Arthroderma benhamiae (strain ATCC MYA-4681 / CBS 112371) OX=663331 GN=ARB_02922 PE=3 SV=1 && - && PF02469:Fasciclin domain	-
FPSE_12184	1674.09750803108	1366.89059446654	1048.37017043425	60.8562934921922	44.0872092900589	41.9352210578122	1363.11942431062	48.9595746133544	4.80238163425723	9.28345171610335e-94	8.1675034577301e-92	-	Contig2174	88088	89976	+	1443	protein_coding	- && - && - && -	-
FPSE_05652	1402.34818510417	1137.15300510121	1062.4018935567	111.220122589179	96.8001769194771	86.8658150483252	1200.63436125402	98.2953715189937	3.61173864056957	1.52142889864441e-93	1.32930915289145e-91	-	Contig1256	10918	12018	-	1047	protein_coding	- && - && - && -	-
novel.461	769.618418289272	762.267399023886	727.645070492606	61.9055399317128	86.2575833935934	70.8904927405873	753.176962601921	73.0178720219645	3.36284233633471	4.01669461048308e-93	3.48544548083631e-91	-	Contig1365	73320	74026	+	604	-	- && - && -	-
FPSE_04336	60396.2870205058	56376.0664380225	44990.7156602515	6386.76307736162	7795.76870359432	6902.33769458704	53921.0230395933	7028.28982518099	2.93956105772025	4.47107677023416e-93	3.85333820422426e-91	-	Contig1225	6700	7009	-	249	protein_coding	- && - && - && -	-
FPSE_03435	2475.14961665891	3076.9457052654	2637.96394702002	399.762893457332	447.581016053424	449.305939905131	2730.01975631478	432.216616471962	2.65874260256954	4.9589333383465e-93	4.24491395023728e-91	-	Contig1212	171058	171219	+	162	protein_coding	- && - && - && -	-
FPSE_07372	1484.48137598879	1108.31565078757	1120.53331792112	94.43217955685	96.8001769194771	77.8796962502226	1237.77678156583	89.7040175755166	3.78619675725052	5.79863879110619e-93	4.93039965399492e-91	-	Contig1365	146668	148380	-	1713	protein_coding	- && sp|J5J924|OPS2_BEAB2 MFS transporter OpS2 OS=Beauveria bassiana (strain ARSEF 2860) OX=655819 GN=OpS2 PE=2 SV=1 && - && PF07690:Major Facilitator Superfamily	MFS_1
FPSE_10602	5837.54049287396	4209.29248464766	3741.45874400675	226.63723093644	309.568882623674	222.656054664098	4596.09724050946	252.954056074737	4.18259156500887	7.60923213513702e-93	6.42675746133673e-91	-	Contig1635	12394	14587	-	2148	protein_coding	- && sp|Q22523|NPL21_CAEEL Neprilysin-21 OS=Caenorhabditis elegans OX=6239 GN=nep-21 PE=1 SV=2 && - && PF05649:Peptidase family M13|PF01431:Peptidase family M13	-
FPSE_12168	2427.49208614561	2366.58554400606	2508.67164110605	7446.50198127738	7248.51225784163	7317.69607458823	2434.24975708591	7337.57010456908	-1.59185465076195	9.85731354313713e-93	8.27035134291419e-91	-	Contig2174	48502	49461	+	906	protein_coding	- && sp|P15703|BGL2_YEAST Glucan 1,3-beta-glucosidase OS=Saccharomyces cerevisiae (strain ATCC 204508 / S288c) OX=559292 GN=BGL2 PE=1 SV=1 && - && PF00332:Glycosyl hydrolases family 17	Glyco_hydro_17
FPSE_09811	3468.85982736179	2627.08297797261	2609.90050077513	286.444277989112	296.151036318004	229.645258173733	2901.94776870318	270.746857493616	3.4218796586188	1.10336086818309e-92	9.19636765724442e-91	-	Contig1600	43601	44642	-	984	protein_coding	- && - && - && PF12697:Alpha/beta hydrolase family	-
FPSE_11047	75.0352608081767	67.2871600651602	103.233391543717	7160.05770328827	3030.51642989492	5162.02602068783	81.8519374723512	5117.53338462367	-5.9667793178577	1.35349749551753e-92	1.12074900462167e-90	-	Contig1670	36293	38143	+	1707	protein_coding	- && sp|Q7RVX9|PHO5_NEUCR Repressible high-affinity phosphate permease OS=Neurospora crassa (strain ATCC 24698 / 74-OR23-1A / CBS 708.71 / DSM 1257 / FGSC 987) OX=367110 GN=pho-5 PE=1 SV=2 && - && PF00083:Sugar (and other) transporter	Sugar_tr
FPSE_12206	23.32177025119	27.8761091698521	25.056648432941	704.044360918292	824.239130205448	1059.36356053187	25.4181759513277	862.549017218538	-5.08336298242004	1.82998224176438e-92	1.50545746889045e-90	-	Contig2175	47679	48539	-	861	protein_coding	- && - && - && -	-
FPSE_11519	2752.98287965135	3389.3503769965	3348.57049657823	17533.957250828	16300.7664262026	18831.9096278904	3163.63458440869	17555.5444349737	-2.4722018980149	6.38810558612704e-92	5.22134901100926e-90	-	Contig2157	21927	23294	+	1317	protein_coding	- && sp|Q4WGL5|SUN1_ASPFU Secreted beta-glucosidase sun1 OS=Neosartorya fumigata (strain ATCC MYA-4609 / Af293 / CBS 101355 / FGSC A1100) OX=330879 GN=sun1 PE=1 SV=1 && - && PF03856:Beta-glucosidase (SUN family)	-
FPSE_08435	24099.5005895667	16772.7665139569	15858.853926177	24.1326681089728	38.336703730486	11.9814917308035	18910.3736765668	24.8169545234207	9.57111303439653	6.71996232061419e-92	5.45738478460648e-90	-	Contig1572	13427	14891	+	1413	protein_coding	- && - && - && PF07247:Alcohol acetyltransferase	-
FPSE_06725	2219.62413390674	1754.2723874131	1775.01297498954	236.080448892125	204.142947364838	244.622122837238	1916.30316543646	228.281839698067	3.07003305388216	9.44080437866052e-92	7.61818794097134e-90	-	Contig1357	145350	148807	+	2739	protein_coding	- && - && - && PF13391:HNH endonuclease	-
FPSE_03745	5512.04969936822	4556.30198155513	4789.828914441	776.442365245211	789.736096848011	629.028315867183	4952.72686512145	731.735592653468	2.75878881029492	1.89118582326854e-91	1.51641982246766e-89	-	Contig1218	4137	4539	-	351	protein_coding	- && - && - && -	-
FPSE_11487	30.4197003276392	20.186148019548	29.0657121822115	863.529819725417	1329.3252018546	920.577947983401	26.5571868431329	1037.81098985447	-5.29173299998288	2.2032498912437e-91	1.74889552829532e-89	-	Contig2156	437303	438361	+	855	protein_coding	- && - && - && PF11807:Mycotoxin biosynthesis protein UstYa	-
FPSE_00471	117.622841266872	127.845604123804	114.258316854211	829.953933660759	874.07684505508	949.533219666176	119.908920748296	884.521332794005	-2.88243413822485	2.21649098916535e-91	1.74889552829532e-89	-	Contig0339	72140	73439	+	1080	protein_coding	- && - && - && -	-
FPSE_07810	16.2238401747409	28.8373543136401	31.0702440568468	593.873484768634	697.728007894845	634.020604088351	25.3771461817426	641.87403225061	-4.65770604858286	2.22252885038713e-91	1.74889552829532e-89	-	Contig1559	5701	7267	-	1515	protein_coding	- && sp|Q9P6J0|YHDC_SCHPO Uncharacterized transporter C1683.12 OS=Schizosaccharomyces pombe (strain 972 / ATCC 24843) OX=284812 GN=SPBC1683.12 PE=3 SV=1 && - && PF07690:Major Facilitator Superfamily	MFS_1
FPSE_10913	1019.05996097591	1086.20701248044	1209.73498634239	4665.99891654791	4609.98862359094	4863.48718506198	1105.00065326625	4713.15824173361	-2.09263046468033	3.43293989961031e-91	2.68468614741747e-89	-	Contig1658	36544	39320	-	2718	protein_coding	- && - && - && PF02141:DENN (AEX-3) domain|PF03456:uDENN domain	DENN
novel.142	872.031409392323	959.322653500426	743.681325489688	48.2653362179455	52.7129676294182	67.8951198078864	858.345129460813	56.2911412184167	3.92963917876813	4.92013630490543e-91	3.82412311943846e-89	-	Contig1195	50168	51145	-	923	-	- && O43029.1 RecName: Full=L-pipecolate oxidase; AltName: Full=L-pipecolic acid oxidase; Flags: Precursor && PF01266:FAD dependent oxidoreductase	DAO
FPSE_12415	57431.3802285719	48326.5996039418	32570.6361650113	3216.98958357002	2845.54183439532	2945.45005048919	46109.5386658417	3002.66048948484	3.94078434839871	1.24862333667048e-90	9.64561527577943e-89	-	Contig2192	10569	10989	-	366	protein_coding	- && - && - && -	-
FPSE_08070	1410.46010519154	1207.32390059773	1027.32258575058	108.072383270617	99.6754296992635	84.868899759858	1215.03553051328	97.5389042432462	3.63962053404229	1.42142774020616e-90	1.09139806307102e-88	-	Contig1564	128775	130595	+	1539	protein_coding	- && - && - && -	-
FPSE_08023	526.260815668158	656.530433207206	562.271190835195	3132.00062196886	3350.62790604447	3616.41358741418	581.68747990352	3366.34737180917	-2.53247647092511	7.13996604577107e-90	5.4491704719201e-88	-	Contig1564	10540	13240	-	2652	protein_coding	- && sp|P09805|KTXA_KLULA Killer toxin subunits alpha/beta OS=Kluyveromyces lactis (strain ATCC 8585 / CBS 2359 / DSM 70799 / NBRC 1267 / NRRL Y-1140 / WM37) OX=284590 PE=1 SV=1 && - && PF00187:Chitin recognition protein|PF00704:Glycosyl hydrolases family 18	-
FPSE_06247	971.402430462612	1009.3074009774	1148.59676416601	4501.26722554318	4756.62651536005	4993.28667881235	1043.10219853534	4750.39347323853	-2.18722750710557	9.04741913286187e-90	6.86357802360641e-88	-	Contig1273	413380	416292	+	2694	protein_coding	- && sp|Q03516|RSN1_YEAST Uncharacterized protein RSN1 OS=Saccharomyces cerevisiae (strain ATCC 204508 / S288c) OX=559292 GN=RSN1 PE=1 SV=1 && - && PF02714:Calcium-dependent channel, 7TM region, putative phosphate|PF12621:Extracellular tail, of 10TM putative phosphate transporter|PF13967:Late exocytosis, associated with Golgi transport|PF14703:Cytosolic domain of 10TM putative phosphate transport…	-
FPSE_10074	1325.28494427415	1062.17588388574	1065.40869136865	64.0040328107539	59.4218907822533	32.9491022597096	1150.95650650951	52.1250086175722	4.46579611065223	1.52048612613161e-89	1.14660944833103e-87	-	Contig1610	69868	75873	-	5895	protein_coding	- && sp|Q18297|TRPA1_CAEEL Transient receptor potential cation channel subfamily A member 1 homolog OS=Caenorhabditis elegans OX=6239 GN=trpa-1 PE=2 SV=5 && - && PF17100:N-terminal domain of NWD NACHT-NTPase|PF12796:Ankyrin repeats (3 copies)	-
FPSE_01587	1702.48922833687	1851.35814693569	2058.65423525043	8678.31730127451	8906.57469418515	8056.55473132111	1870.83387017433	8547.14890892693	-2.19174970473655	3.12918256307129e-89	2.34577596991421e-87	-	Contig1190	243033	244156	+	1071	protein_coding	- && - && - && -	-
FPSE_12431	1081.92734165303	1315.94460184578	780.765165170441	27.2804074275344	31.6277805776509	31.950644615476	1059.54570288975	30.2862775402204	5.12709199554639	5.45689812125831e-89	4.06667307636597e-87	-	Contig2197	2192	4040	+	1746	protein_coding	- && sp|P39992|YEC3_YEAST Uncharacterized protein YEL023C OS=Saccharomyces cerevisiae (strain ATCC 204508 / S288c) OX=559292 GN=YEL023C PE=4 SV=1 && - && PF09994:Uncharacterized alpha/beta hydrolase domain (DUF2235)	-
FPSE_10436	2401.12834586165	2178.18149582361	1919.33926996328	341.00509284418	339.279828014801	375.420074231842	2166.21637054951	351.901665030275	2.62190148442557	8.48708820698238e-89	6.28789008738361e-87	-	Contig1627	26168	27195	-	873	protein_coding	- && sp|A0A443HJZ3|VDTF1_BYSSP Short-chain dehydrogenase/reductase VdtF OS=Byssochlamys spectabilis OX=264951 GN=VdtF PE=1 SV=1 && - && PF00106:short chain dehydrogenase	adh_short
FPSE_06734	534.372735755528	688.25152295221	648.466061444512	20.9849287904111	15.3346814921944	19.9691528846725	623.696773384083	18.7629210557593	5.05988893187001	8.84293341129054e-89	6.51343740625813e-87	-	Contig1357	167064	167840	-	777	protein_coding	- && - && - && PF13419:Haloacid dehalogenase-like hydrolase	-
FPSE_06635	1198.53619290898	939.136505480878	869.96683359171	69.2502650083566	48.8792972563696	61.9043739424847	1002.54651066052	60.0113120690703	4.06541613904245	4.06925295891913e-88	2.97996333737263e-86	-	Contig1356	141119	142459	+	1341	protein_coding	- && sp|Q9C1B9|TRI8_FUSSP Trichothecene C-3 esterase OS=Fusarium sporotrichioides OX=5514 GN=TRI8 PE=1 SV=1 && - && PF03583:Secretory lipase	-
FPSE_11158	1216.78801310557	878.578061422234	758.715314549453	13.6402037137672	21.0851870517673	14.9768646635044	951.360463025751	16.5674184763463	5.83718398793266	4.3674810273643e-88	3.17997799630335e-86	-	Contig1683	16635	18274	-	1503	protein_coding	- && sp|B6HLP5|CHYH_PENRW FAD-linked oxidoreductase chyH OS=Penicillium rubens (strain ATCC 28089 / DSM 1075 / NRRL 1951 / Wisconsin 54-1255) OX=500485 GN=chyH PE=3 SV=1 && - && PF01565:FAD binding domain	FAD_binding_4
FPSE_00111	159.196431714645	210.512686489573	201.455453400845	1500.42240851439	1754.862613263	1460.74353351379	190.388190535021	1572.00951843039	-3.04491714259146	8.70468892144941e-88	6.30169736833386e-86	-	Contig0333	44821	45633	+	813	protein_coding	- && - && - && -	-
FPSE_06775	751.366598092688	819.942107651166	722.633740806017	64.0040328107539	36.4198685439617	46.9275092789803	764.647482183291	49.1171368778986	3.9671857073187	1.15256963080007e-87	8.29653673443529e-86	-	Contig1358	13825	17923	+	3906	protein_coding	- && - && - && -	-
FPSE_02228	234.231692522822	314.327162018677	303.686579007245	2502.45275825652	2370.1667081373	3051.28656077795	284.081811182914	2641.30200905726	-3.21632498346337	1.31106475573169e-87	9.38411264992359e-86	-	Contig1195	434193	435812	+	1521	protein_coding	- && sp|A0A1Y1C7S2|QNN2_EMEVA Quiannulatic acid synthase OS=Emericella variicolor OX=1549217 GN=Qnn-P450 PE=3 SV=1 && - && PF00067:Cytochrome P450	p450
FPSE_02905	2035.07795191906	1896.53666869373	1797.06282561053	394.516661259729	395.826466017268	344.4678872606	1909.55914874111	378.270338179199	2.33575246072641	1.37199779411144e-87	9.76507868179653e-86	-	Contig1204	29854	36063	+	6156	protein_coding	- && - && - && PF12796:Ankyrin repeats (3 copies)|PF05729:NACHT domain|PF13857:Ankyrin repeats (many copies)	NACHT
FPSE_09528	735.142757917947	704.592690396606	667.509114253547	50.3638290969866	73.7981546811855	65.8982045194192	702.414854189367	63.3533960991971	3.46643591755477	2.78563591190629e-87	1.97157661273412e-85	-	Contig1593	207183	208241	+	813	protein_coding	- && sp|P38298|YPC1_YEAST Alkaline ceramidase YPC1 OS=Saccharomyces cerevisiae (strain ATCC 204508 / S288c) OX=559292 GN=YPC1 PE=1 SV=1 && - && PF05875:Ceramidase	-
FPSE_09262	2939.55704166087	2521.34601215593	2331.27057020083	314.773931856167	382.408619711598	386.403108318412	2597.39120800587	361.195219962059	2.84544342282439	3.21062063580656e-87	2.25974182416852e-85	-	Contig1590	35562	36380	-	819	protein_coding	- && - && - && PF01636:Phosphotransferase enzyme family	APH
FPSE_00106	12751.9383773463	7680.34869886614	9226.86021894618	783.787090321855	693.894337521796	633.022146444117	9886.38243171956	703.567858095923	3.81281481918551	7.44747772331369e-87	5.21282294346194e-85	-	Contig0333	30265	31075	-	744	protein_coding	- && - && - && -	-
FPSE_03901	351.854533789693	336.435800325801	327.740961502868	1616.88876330118	1855.49646055552	1622.49367187964	338.677098539454	1698.29296524544	-2.32639139399705	1.45213578487117e-86	1.01083012409521e-84	-	Contig1219	180090	181991	-	1791	protein_coding	- && sp|P25340|ERG4_YEAST Delta(24(24(1)))-sterol reductase OS=Saccharomyces cerevisiae (strain ATCC 204508 / S288c) OX=559292 GN=ERG4 PE=1 SV=2 && - && PF01222:Ergosterol biosynthesis ERG4/ERG24 family	-
FPSE_08201	3193.05454439119	2620.35426196609	2246.07796552883	279.099552912468	225.228134416605	202.686901779426	2686.49559062871	235.671529702833	3.51174548270096	5.64618876113218e-85	3.90882871119036e-83	-	Contig1566	24162	26490	-	1890	protein_coding	- && - && - && -	-
FPSE_04477	989.654250659195	724.778838416154	644.456997695242	18.88643591137	16.2930990854565	20.9676105289061	786.296695590197	18.7157151752442	5.39444888245104	2.59925179589834e-84	1.78966961968674e-82	-	Contig1229	28120	29781	+	1662	protein_coding	- && - && - && -	-
FPSE_05216	79.0912208518619	85.5508177971322	83.188072797364	772.245379487129	741.815217184904	648.997468751855	82.610037148786	721.019355141296	-3.12504810564226	2.70535262659235e-84	1.85265472574587e-82	-	Contig1247	64794	65267	-	474	protein_coding	- && - && - && -	-
FPSE_05016	5698.62386137774	5242.63101421977	4280.67781828364	301.133728142399	146.637891769109	211.673020577528	5073.97756462705	219.814880163012	4.53045815074295	3.33763412227738e-84	2.27335949973829e-82	-	Contig1242	139219	139764	-	489	protein_coding	- && sp|B8NI03|HYPC_ASPFN Noranthrone monooxygenase OS=Aspergillus flavus (strain ATCC 200026 / FGSC A1120 / NRRL 3357 / JCM 12722 / SRRC 167) OX=332952 GN=hypC PE=1 SV=1 && - && PF08592:Domain of unknown function (DUF1772)	-
FPSE_01992	295.0710931781	301.830975149433	366.829333058256	1850.87071931426	1758.69628363604	1705.36565635103	321.24380046193	1771.64421976711	-2.46346098941604	4.97222102858547e-84	3.36861327332349e-82	-	Contig1193	223362	224115	-	651	protein_coding	- && - && - && -	-
FPSE_05475	671.261387229905	669.02662007645	531.200946778348	8.39397151616444	14.3762638989322	16.9737799519716	623.829651361568	13.2480051223561	5.54929386186021	7.85264683076888e-84	5.29176503718143e-82	-	Contig1251	10573	11601	+	1029	protein_coding	- && sp|A0A2Z5TIQ0|HIMH_ASPJA Trans-enoyl reductase himH OS=Aspergillus japonicus OX=34381 GN=himH PE=3 SV=1 && - && PF00107:Zinc-binding dehydrogenase|PF08240:Alcohol dehydrogenase GroES-like domain	ADH_zinc_N
FPSE_12295	916.646969872861	807.445920781922	836.892057660228	74.4964972059594	93.9249241396906	59.9074586540174	853.661649438337	76.1096266665558	3.48513088413538	1.70244418831242e-83	1.1411780646418e-81	-	Contig2184	26418	30184	+	3261	protein_coding	- && sp|O60177|YG42_SCHPO Uncharacterized ATP-dependent helicase C23E6.02 OS=Schizosaccharomyces pombe (strain 972 / ATCC 24843) OX=284812 GN=SPBC23E6.02 PE=3 SV=1 && - && PF00176:SNF2 family N-terminal domain|PF00271:Helicase conserved C-terminal domain	SNF2_N
FPSE_05550	5534.35747960849	5611.74914943436	5489.41053868871	14800.670275877	14764.4230242034	15521.0240796117	5545.17238924385	15028.7057932307	-1.43840604050811	1.96986269209021e-83	1.31348370768899e-81	-	Contig1252	135306	137204	+	1845	protein_coding	- && sp|A0A411KUQ2|UCSM_ACRSP MFS-type transporter ucsM OS=Acremonium sp. OX=2046025 GN=ucsM PE=3 SV=1 && - && PF00854:POT family	-
FPSE_05362	1270.5294836844	2347.3606411303	1139.57637073016	20.9849287904111	23.0020222382916	19.9691528846725	1585.82216518162	21.3187013044584	6.21617066417298	2.36551856455967e-83	1.56904474839825e-81	-	Contig1247	458539	460985	+	1068	protein_coding	- && sp|P21367|YCAC_ECOLI Probable hydrolase YcaC OS=Escherichia coli (strain K12) OX=83333 GN=ycaC PE=1 SV=1 && - && PF00857:Isochorismatase family	Isochorismatase
FPSE_07625	309.266953330998	471.971365599909	344.779482437268	4364.86518840551	3698.53349239863	4860.49181212928	375.339267122725	4307.96349764447	-3.52006457462911	4.77136116951314e-83	3.14835284669594e-81	-	Contig1402	32377	33589	-	822	protein_coding	- && sp|P34559|ECHM_CAEEL Probable enoyl-CoA hydratase, mitochondrial OS=Caenorhabditis elegans OX=6239 GN=ech-6 PE=3 SV=1 && - && PF00378:Enoyl-CoA hydratase/isomerase	ECH
FPSE_03149	190.630122053206	201.861480195481	235.532495269645	1243.35703083186	1459.66999453825	1322.95637860955	209.341365839444	1341.99446799322	-2.68073004359734	7.29034498444359e-83	4.78556376206818e-81	-	Contig1206	238195	238974	+	780	protein_coding	- && - && - && -	-
FPSE_07057	1003.85011081209	767.073624742826	777.758367358488	67.1517721293155	69.0060667148747	53.9167127886157	849.560700971136	63.358183877602	3.74479342963976	8.6289228586937e-83	5.63504245859745e-81	-	Contig1362	91013	93325	-	2313	protein_coding	- && - && - && -	-
FPSE_03844	1011.96203089946	1191.94397829712	1002.26593731764	72.3980043269183	113.093276004934	82.8719844713907	1068.72398217141	89.4544216010809	3.57508383395007	9.91814710298622e-83	6.44374387937089e-81	-	Contig1218	282473	283434	+	909	protein_coding	- && - && - && PF05368:NmrA-like family	NmrA
FPSE_10904	836.541759010078	751.693702442218	588.330105205454	35.6743789436989	23.0020222382916	25.9598987500742	725.521855552583	28.2120999773549	4.69053827078948	1.85448334517446e-82	1.198696403062e-80	-	Contig1657	20043	20969	+	927	protein_coding	- && - && - && PF06041:Bacterial protein of unknown function (DUF924)	-
FPSE_01886	2474.13562664799	2207.01885013725	1938.38232277231	384.024196864523	352.697674320471	382.409277741478	2206.51226651918	373.043716308824	2.56466579133999	2.09065335805384e-82	1.34449174584691e-80	-	Contig1192	121140	124871	+	2907	protein_coding	- && - && - && PF04082:Fungal specific transcription factor domain|PF03747:ADP-ribosylglycohydrolase	Fungal_trans
FPSE_01980	962.27652036432	1024.68732327801	1402.17004630738	10865.9961276749	11109.9767410948	9143.87510589152	1129.7112966499	10373.2826582204	-3.19889107600877	2.71242926255411e-82	1.73554375390394e-80	-	Contig1193	195740	197657	+	1761	protein_coding	- && sp|P15710|PHO4_NEUCR Phosphate-repressible phosphate permease pho-4 OS=Neurospora crassa (strain ATCC 24698 / 74-OR23-1A / CBS 708.71 / DSM 1257 / FGSC 987) OX=367110 GN=pho-4 PE=1 SV=1 && - && PF01384:Phosphate transporter family	-
FPSE_12037	1180.2843727124	873.771835703294	719.626942994065	18.88643591137	29.7109453911266	18.9706952404388	924.56105046992	22.5226921809785	5.35348314488881	9.44246467815582e-82	6.01138618128423e-80	-	Contig2170	11269	13023	-	1506	protein_coding	- && - && - && PF07247:Alcohol acetyltransferase	-
FPSE_09614	1112.34704198067	887.229267716326	831.88072797364	57.7085541736305	69.9644843081369	42.9336787020458	943.81901255688	56.8689057279378	4.05089522565197	1.03708949043668e-81	6.56944337717112e-80	-	Contig1594	90042	91014	+	927	protein_coding	- && - && - && PF05368:NmrA-like family	NmrA
FPSE_05100	2209.48423379753	2206.05760499347	2147.8559036717	5979.65545882764	6240.25694972985	6215.39883535431	2187.79924748756	6145.1037479706	-1.48998268065623	2.23033090749121e-81	1.40577424213961e-79	-	Contig1244	147653	149192	-	1155	protein_coding	- && sp|P48008|SPN3_SCHPO Septin homolog spn3 OS=Schizosaccharomyces pombe (strain 972 / ATCC 24843) OX=284812 GN=spn3 PE=1 SV=3 && - && PF00735:Septin	GTP_CDC
FPSE_07260	15845.6219006673	11251.3744080386	10323.3391543717	1277.98216333604	1359.03614724573	1213.12603774385	12473.4451543592	1283.38144944187	3.28078002618231	4.9181575926864e-81	3.08456131394772e-79	-	Contig1364	342379	345882	-	3456	protein_coding	- && sp|D4B1B1|ALS1_ARTBC Agglutinin-like protein ARB_02240 OS=Arthroderma benhamiae (strain ATCC MYA-4681 / CBS 112371) OX=663331 GN=ARB_02240 PE=1 SV=1 && - && -	-
FPSE_06676	7393.00116962724	6357.67538101385	5021.35234596137	823.658455023636	758.10831627036	800.763030675366	6257.34296553415	794.176600656454	2.97813515868811	5.72859955250777e-81	3.57515407540497e-79	-	Contig1357	21926	23215	-	1290	protein_coding	- && - && - && PF00646:F-box domain	F-box
FPSE_09214	2001.61628155866	1741.77620054386	1624.67308439189	264.41010275918	315.319388183247	270.582021587312	1789.35518883147	283.437170843246	2.65741908101208	6.24895200105283e-81	3.88078298535972e-79	-	Contig1588	352221	355467	-	2886	protein_coding	- && - && - && -	-
FPSE_02077	686.471237393724	741.12000586055	597.350498641313	68.2010185688361	68.0476491216126	69.8920350963536	674.980580631862	68.7135675956008	3.29636711384624	6.85545114257527e-81	4.23666880611152e-79	-	Contig1195	74731	75885	+	1155	protein_coding	- && sp|Q2PGG3|SRR_ARATH Serine racemase OS=Arabidopsis thaliana OX=3702 GN=SR PE=1 SV=1 && - && PF00291:Pyridoxal-phosphate dependent enzyme	PALP
FPSE_04326	466.435405023801	647.879226913114	692.565762686488	5066.81105644476	4857.26036265257	5728.1515049683	602.293464874468	5217.40764135521	-3.11455915579546	9.3448415702636e-81	5.74707756571211e-79	-	Contig1224	187945	188859	+	849	protein_coding	- && - && - && -	-
FPSE_08051	894.339189632592	665.181639501298	592.339168954724	26.2311609880139	23.0020222382916	21.9660681731397	717.286666029538	23.7330837998151	4.91934793832103	1.62263784924167e-80	9.93101396717039e-79	-	Contig1564	84726	86273	+	1494	protein_coding	- && sp|Q4WYN5|CRMB_ASPFU Probable alcohol acetyltransferase crmB OS=Neosartorya fumigata (strain ATCC MYA-4609 / Af293 / CBS 101355 / FGSC A1100) OX=330879 GN=crmB PE=2 SV=1 && - && PF07247:Alcohol acetyltransferase	-
FPSE_05010	2729.66110940016	2350.24437656167	2379.37933519207	550.854380748291	538.630687413328	485.250415097541	2486.42827371797	524.911827753053	2.24397879920468	1.747787463157e-80	1.06455381590077e-78	-	Contig1242	122254	124037	-	1662	protein_coding	- && - && - && -	-
FPSE_00223	1076.85739159843	1044.87347129756	1125.54464760771	195.159837750823	188.808265872643	153.762477211978	1082.4251701679	179.243526945148	2.59460449360237	3.41921801529722e-80	2.07263507348327e-78	-	Contig0335	35481	36347	+	747	protein_coding	- && - && - && PF00106:short chain dehydrogenase	adh_short
FPSE_01058	2276.40757451833	1538.95347520459	1856.19651591227	204.603055706508	188.808265872643	180.720833606286	1890.51918854506	191.377385061813	3.30457614896632	3.80868976840977e-80	2.29772812742778e-78	-	Contig0351	39446	39744	+	234	protein_coding	- && - && - && -	-
FPSE_05061	65.9093507098849	50.9459926207641	86.1948706093169	968.454463677472	1247.85970642732	972.497745483549	67.6834046466553	1062.93730519611	-3.97515091710136	4.30827630630877e-80	2.58680343718606e-78	-	Contig1244	45080	46375	+	1140	protein_coding	- && - && - && -	-
FPSE_00621	1512.87309629459	1569.71331980581	1695.83396594144	5255.67541555846	5683.41632804455	5417.63117761164	1592.80679401395	5452.24097373822	-1.77532922718668	1.05574920885656e-79	6.30909751273764e-78	-	Contig0341	2112	4872	-	2712	protein_coding	- && sp|O74839|MSY1_SCHPO Mechanosensitive ion channel protein Msy1 OS=Schizosaccharomyces pombe (strain 972 / ATCC 24843) OX=284812 GN=msy1 PE=1 SV=1 && - && PF00924:Mechanosensitive ion channel	-
FPSE_06607	1015.00400093223	766.112379599038	607.373158014489	18.88643591137	19.168351865243	19.9691528846725	796.163179515251	19.3413135537618	5.36298154641515	1.45949271804107e-79	8.68089823702458e-78	-	Contig1356	69064	69516	-	453	protein_coding	- && - && - && -	-
FPSE_07847	2499.48537692102	2332.94196397348	1656.74559438606	140.599022895754	188.808265872643	139.784070192707	2163.05764509352	156.397119653702	3.78850772512166	2.28520957614339e-79	1.35286542617573e-77	-	Contig1559	125291	126133	+	735	protein_coding	- && - && - && -	-
FPSE_06034	14932.0169008272	11396.5224247506	13972.5894321452	2507.69899045413	2170.81584873877	2167.6515456312	13433.7095859076	2282.05546160803	2.55754043862745	2.8823202703078e-79	1.69842397695486e-77	-	Contig1267	44823	45470	-	648	protein_coding	- && - && - && PF13649:Methyltransferase domain	-
FPSE_04031	61.8533906661997	66.3259149213722	52.1178287405172	775.39311880569	615.3040948743	655.986672261491	60.0990447760297	682.227961980494	-3.50343249406393	1.0153695912061e-78	5.95542469953242e-77	-	Contig1220	288083	289048	+	966	protein_coding	- && - && - && PF10528:GLEYA domain	-
FPSE_05575	1552.41870672052	1481.27876657731	1399.16324849542	323.167903372331	329.695652082179	359.444751924104	1477.62024059775	337.436102459538	2.13040723910775	1.64245154413359e-78	9.58904083531264e-77	-	Contig1252	200848	203982	-	3135	protein_coding	- && sp|C7G046|Y6969_DICDI von Willebrand factor A domain-containing protein DDB_G0286969 OS=Dictyostelium discoideum OX=44689 GN=DDB_G0286969 PE=4 SV=1 && - && PF13768:von Willebrand factor type A domain|PF08487:Vault protein inter-alpha-trypsin domain	-
FPSE_10560	496.85510535144	470.048875312333	424.960757422679	17.8371894718494	14.3762638989322	19.9691528846725	463.954912695484	17.3942020851514	4.74046275029041	2.08230391173469e-78	1.21012423200765e-76	-	Contig1632	1422	2264	-	843	protein_coding	- && - && - && PF07366:SnoaL-like polyketide cyclase	-
FPSE_03228	657.065527077007	570.979615410073	471.06499053929	15.7386965928083	17.2515166787187	20.9676105289061	566.370044342123	17.985941266811	4.97522906777599	1.60456431235349e-77	9.28229464529971e-76	-	Contig1208	12520	13338	-	762	protein_coding	- && - && - && PF12697:Alpha/beta hydrolase family	-
FPSE_08807	1265.45953362979	1019.88109755907	1016.29766044009	155.288473049042	148.554726955633	132.794866683072	1100.54609720965	145.546022229249	2.91893133782899	2.25685200135195e-77	1.29963900023308e-75	-	Contig1579	35089	38759	-	2781	protein_coding	- && sp|Q9FNI6|SM3L2_ARATH DNA repair protein RAD5A OS=Arabidopsis thaliana OX=3702 GN=RAD5A PE=1 SV=1 && - && PF00176:SNF2 family N-terminal domain|PF00271:Helicase conserved C-terminal domain	SNF2_N
FPSE_05536	27.3777302948753	36.5273154639441	27.0611803075762	449.077476114798	441.830510493851	476.264296299438	30.3220753554652	455.724094302696	-3.90644932828967	3.01458958177216e-77	1.72813734893536e-75	-	Contig1252	86240	90372	-	3807	protein_coding	- && sp|Q9D7Q1|CHIT1_MOUSE Chitotriosidase-1 OS=Mus musculus OX=10090 GN=Chit1 PE=1 SV=2 && - && PF00187:Chitin recognition protein|PF00704:Glycosyl hydrolases family 18	-
FPSE_10431	1553.43269673144	832.43829452041	917.073332645639	25.1819145484933	21.0851870517673	20.9676105289061	1100.98144129916	22.4115707097222	5.62035032613367	4.82400256552695e-77	2.75294092354328e-75	STE6-1	Contig1627	8017	12074	-	3897	protein_coding	- && sp|K3VYH8|W4934_FUSPC ABC transporter FPSE_09185 OS=Fusarium pseudograminearum (strain CS3096) OX=1028729 GN=FPSE_09185 PE=3 SV=1 && - && PF00664:ABC transporter transmembrane region|PF00005:ABC transporter	ABC_membrane
FPSE_10966	259.581442795854	527.723583939613	456.031001479526	6961.75012621888	7318.47674214977	7352.6420921364	414.445342738331	7210.95632016835	-4.12044909907109	1.10341659151372e-76	6.26869273447862e-75	-	Contig1664	11378	13063	+	1686	protein_coding	- && - && - && PF00026:Eukaryotic aspartyl protease	Asp
FPSE_04080	1565.6005768625	747.848721867066	1254.83695352168	9.443217955685	15.3346814921944	9.98457644233624	1189.42875075042	11.5874919634052	6.67460891058876	1.52504807689457e-76	8.62537235990057e-75	-	Contig1220	424713	426357	+	1395	protein_coding	- && sp|B0VXW0|OXLA_SISCA L-amino-acid oxidase OS=Sistrurus catenatus edwardsii OX=8762 PE=2 SV=1 && - && PF13450:NAD(P)-binding Rossmann-like domain	-
FPSE_11382	725.002857808734	529.646074227189	545.232669900795	14.6894501532878	13.4178463056701	8.98611879810261	599.960533978906	12.3644717523535	5.60247190577233	2.12558148079624e-76	1.19684407912034e-74	-	Contig2156	161527	164171	-	1839	protein_coding	- && sp|O31462|YBGF_BACSU Uncharacterized amino acid permease YbgF OS=Bacillus subtilis (strain 168) OX=224308 GN=ybgF PE=3 SV=1 && - && PF00324:Amino acid permease	AA_permease
FPSE_11910	11.1538901201344	14.41867715682	17.0385209343999	487.899594377058	576.967391143814	701.915723896237	14.2036960704514	588.927569805703	-5.37289053569402	2.44233428291384e-76	1.36911208098387e-74	-	Contig2164	34918	36123	+	1029	protein_coding	- && - && - && -	-
FPSE_09539	1826.19600966927	1479.35627628974	1438.25162005081	245.52366684781	259.731167774042	259.598987500742	1581.26796866994	254.951274040865	2.63238037058621	2.92965706390621e-76	1.63505838513779e-74	-	Contig1593	230221	232796	+	2247	protein_coding	- && sp|Q55874|Y103_SYNY3 Uncharacterized protein sll0103 OS=Synechocystis sp. (strain PCC 6803 / Kazusa) OX=1111708 GN=sll0103 PE=4 SV=1 && - && PF00092:von Willebrand factor type A domain|PF14623:Hint-domain|PF14624:VWA / Hh protein intein-like	VWA
FPSE_04009	41151.7706032303	31730.702196442	24589.5925061509	2240.14114837639	1585.22269925559	1337.93324327306	32490.6884352744	1721.09903030168	4.23875715427736	3.27055722984251e-76	1.81731094495065e-74	-	Contig1220	226076	226867	-	792	protein_coding	- && - && - && PF17784:Sulfotransferase domain	-
FPSE_05527	1570.6705269171	1350.54942702214	1273.88000633072	259.163870561577	234.812310349227	236.634461683369	1398.36665342332	243.536880864724	2.52205544056582	6.11903561376947e-76	3.38524289042993e-74	-	Contig1252	70583	71764	+	1134	protein_coding	- && sp|O42909|YBI2_SCHPO Zinc-type alcohol dehydrogenase-like protein C16A3.02c OS=Schizosaccharomyces pombe (strain 972 / ATCC 24843) OX=284812 GN=SPBC16A3.02c PE=3 SV=1 && - && PF13602:Zinc-binding dehydrogenase	-
FPSE_07535	3136.2711037796	4439.99131915678	2581.83705453024	141.648269335275	218.51921126377	158.754765433146	3386.03315915554	172.97408201073	4.28970768883809	6.45157591073762e-76	3.55369631361456e-74	-	Contig1370	55499	55897	-	330	protein_coding	- && - && - && -	-
FPSE_06636	987.626270637352	864.159384265414	791.790090480935	123.811079863426	101.592264885788	103.839595000297	881.1919151279	109.74764658317	3.00697144476116	7.30035947124584e-76	4.00382052559366e-74	-	Contig1356	142870	143727	-	858	protein_coding	- && - && - && PF17784:Sulfotransferase domain	-
FPSE_09935	2513.68123707392	2520.38476701214	1910.31887652742	130.106558500549	93.9249241396906	178.723918317819	2314.79496020449	134.251800319353	4.1088519079559	7.46242265193778e-76	4.07506174902585e-74	-	Contig1603	105335	106469	-	1029	protein_coding	- && sp|O94524|GTO2_SCHPO Glutathione S-transferase omega-like 2 OS=Schizosaccharomyces pombe (strain 972 / ATCC 24843) OX=284812 GN=gto2 PE=3 SV=1 && - && PF13410:Glutathione S-transferase, C-terminal domain|PF13409:Glutathione S-transferase, N-terminal domain	-
FPSE_09737	1302.97716403388	1140.99798567636	967.186629511521	148.992994411919	127.469539903866	125.805663173437	1137.05392640725	134.089399163074	3.08514608296307	1.98532336994693e-75	1.0794876297793e-73	-	Contig1596	10538	11573	-	930	protein_coding	- && sp|Q9P4B6|LDHA_RHIOR L-lactate dehydrogenase A OS=Rhizopus oryzae OX=64495 GN=LDHA PE=3 SV=1 && - && PF00056:lactate/malate dehydrogenase, NAD binding domain|PF02866:lactate/malate dehydrogenase, alpha/beta C-terminal domain	-
FPSE_05377	40.5596004368523	27.8761091698521	50.1132968658819	1263.29271318275	1148.18427672805	780.793877790694	39.5163354908621	1064.09028923383	-4.75347407134444	2.38934569179214e-75	1.29361626364593e-73	-	Contig1247	490650	492313	-	1614	protein_coding	- && sp|P08159|HDNO_PSEOX 6-hydroxy-D-nicotine oxidase OS=Pseudarthrobacter oxydans OX=1671 PE=1 SV=2 && - && PF01565:FAD binding domain|PF08031:Berberine and berberine like	FAD_binding_4
FPSE_11353	1307.03312407756	1024.68732327801	858.941908281216	87.0874544802061	85.2991658003313	76.881238605989	1063.5541185456	83.0892862955088	3.67822782475096	6.27863587539967e-75	3.38485267682717e-73	-	Contig2156	86823	89188	+	2127	protein_coding	- && - && - && PF17111:Fungal N-terminal domain of STAND proteins|PF06395:CDC24 Calponin	-
FPSE_00048	730.072807863341	997.772459251946	1085.454010115	6557.79024700347	6600.62196479642	6714.62765747112	937.76642574343	6624.34662309034	-2.82032689888161	7.71295163693978e-75	4.14048238510127e-73	-	Contig0332	135285	137186	+	1440	protein_coding	- && - && - && -	-
FPSE_01020	2518.75118712853	2321.40702224803	1976.46842839038	317.921671174728	217.560793670508	256.603614568041	2272.20887925564	264.028693137759	3.10673746769139	8.23003244156672e-75	4.39942113933371e-73	-	Contig0348	224277	225738	-	1398	protein_coding	- && - && - && -	-
FPSE_10764	460.351464958273	600.778214867501	601.359562390583	3011.33728142399	3040.10060582754	3334.8485317403	554.163080738786	3128.76213966394	-2.49688597747394	1.03946316329562e-74	5.53317597302193e-73	-	Contig1647	21052	24481	+	3141	protein_coding	- && sp|P21339|MSB1_YEAST Morphogenesis-related protein MSB1 OS=Saccharomyces cerevisiae (strain ATCC 204508 / S288c) OX=559292 GN=MSB1 PE=1 SV=1 && - && PF08101:Domain of unknown function (DUF1708)	-
FPSE_09079	695.597147492016	759.383663592522	517.169223655902	23.0834216694522	22.0436046450294	11.9814917308035	657.38334491348	19.0361726817617	5.11128141744409	1.43813363013719e-74	7.62331169883182e-73	-	Contig1587	6503	8844	+	2139	protein_coding	- && sp|Q9C169|CAT3_NEUCR Catalase-3 OS=Neurospora crassa (strain ATCC 24698 / 74-OR23-1A / CBS 708.71 / DSM 1257 / FGSC 987) OX=367110 GN=cat-3 PE=1 SV=1 && - && PF18011:C-terminal domain found in long catalases|PF00199:Catalase|PF06628:Catalase-related immune-responsive	Catalase
FPSE_09890	667.20542718622	568.095879978709	525.187351154443	27.2804074275344	10.5425935258836	15.975322307738	586.829552773124	17.9327744203853	5.04629892355145	1.47756725622825e-74	7.79970815381487e-73	-	Contig1602	52119	54993	-	2643	protein_coding	- && - && - && -	-
FPSE_05128	139.93062150714	184.559067607296	102.231125606399	1655.71088156344	1733.77742621123	1968.95847442871	142.240271573612	1786.14892740112	-3.64916223786514	1.55770352637611e-74	8.18860828865514e-73	-	Contig1245	42283	42813	+	531	protein_coding	- && - && - && -	-
FPSE_01664	173.392291867543	185.520312751084	172.389741218634	844.643383814047	881.744185801177	932.559439714204	177.100781945754	886.315669776476	-2.32294374661552	2.3700200366097e-74	1.24073486957886e-72	-	Contig1190	485696	488244	-	2439	protein_coding	- && - && - && -	-
FPSE_09600	133.846681441612	240.311285947001	183.414666529128	2091.14815396447	2375.91721369687	2120.72403635222	185.857544639247	2195.92980133785	-3.56129183329038	3.89357192841753e-74	2.02994496959348e-72	-	Contig1594	45768	46994	-	1125	protein_coding	- && - && - && -	-
FPSE_06755	3432.35618696862	2789.53340727278	2699.1021691964	537.214177034524	461.957279952356	437.324448174327	2973.66392114594	478.831968387069	2.63507493818156	1.15033968946194e-73	5.97280882204643e-72	-	Contig1357	219666	227741	-	7011	protein_coding	- && sp|F4JTS8|NOV_ARATH Protein NO VEIN OS=Arabidopsis thaliana OX=3702 GN=NOV PE=1 SV=1 && - && PF03702:Anhydro-N-acetylmuramic acid kinase|PF06985:Heterokaryon incompatibility protein (HET)	-
FPSE_01856	1839.37787981125	1515.88359175368	1372.10206818785	201.455316387947	150.471562142157	190.705410048622	1575.78784658426	180.877429526242	3.12433165209531	1.40076612408982e-73	7.2433902147322e-72	-	Contig1192	47191	52652	-	5253	protein_coding	- && sp|Q5SNQ7|SRAC1_DANRE Protein SERAC1 OS=Danio rerio OX=7955 GN=serac1 PE=3 SV=1 && - && PF13857:Ankyrin repeats (many copies)|PF12796:Ankyrin repeats (3 copies)	-
FPSE_04455	1831.26595972388	1261.15362864986	1322.99103725928	151.09148729096	151.42997973542	147.771731346576	1471.80354187767	150.097732790985	3.29346993967223	1.44839290966455e-73	7.45922348477243e-72	-	Contig1228	41192	42730	+	1167	protein_coding	- && - && - && PF01731:Arylesterase	-
FPSE_03805	3951.51907256033	4015.12096560249	3691.34544714086	603.316702724319	429.371081781443	622.039112357547	3885.99516176789	551.57563228777	2.81731735600461	1.76782044112268e-73	9.06741585772599e-72	-	Contig1218	154738	157195	+	2406	protein_coding	- && - && - && -	-
novel.250	1876.89551021534	1266.92109951259	1112.51519042258	43.0191040203428	72.8397370879234	49.9228822116812	1418.77726671683	55.2605744399824	4.67851093826944	2.08647201521577e-73	1.06586749841809e-71	-	Contig1220	406336	406944	+	552	-	- && - && -	-
FPSE_08297	581.016276257909	583.475802279317	673.522709877453	55.6100612945894	36.4198685439617	56.9120857213165	612.671596138226	49.6473385199559	3.62956670687648	2.74110855087774e-73	1.3946628205249e-71	-	Contig1567	93704	95995	+	1518	protein_coding	- && sp|Q04162|YD387_YEAST Probable metabolite transport protein YDR387C OS=Saccharomyces cerevisiae (strain ATCC 204508 / S288c) OX=559292 GN=YDR387C PE=1 SV=1 && - && PF00083:Sugar (and other) transporter	Sugar_tr
FPSE_04890	480.631265176699	588.282027998257	489.105777411008	5915.65142601689	4396.26150029348	3951.89535587668	519.339690195322	4754.60276072902	-3.19425142903773	4.33403795151195e-73	2.19631707230819e-71	-	Contig1241	8248	8957	-	237	protein_coding	- && - && - && -	-
FPSE_12417	130.804711408849	188.404048182448	137.310433412516	1165.71279430734	1381.07975189076	1258.05663173437	152.173064334605	1268.28305931082	-3.05772025034782	8.59690576874951e-73	4.33921112287998e-71	-	Contig2192	15579	16871	+	1095	protein_coding	- && - && - && -	-
FPSE_07166	201.78401217334	305.675955724585	260.589143702586	2089.04966108543	2616.48002960567	2156.66851154463	256.016370533504	2287.39940074524	-3.15868352099397	1.69724272722987e-72	8.53268575844253e-71	-	Contig1364	55086	55782	-	588	protein_coding	- && - && - && -	-
FPSE_01516	1150.87866239568	971.81884036967	830.878462036323	92.3336866778089	111.176440818409	108.831883221465	984.525321600559	104.114003572561	3.23979634980972	2.28550320860412e-72	1.14446799011089e-70	-	Contig1190	19718	20301	-	483	protein_coding	- && - && - && -	-
FPSE_08949	1037.3117811725	903.570435160722	814.84220703924	128.008065621508	105.425935258836	98.8473067791287	918.57480779082	110.760435886491	3.0535980559501	2.48374684762685e-72	1.23884207923561e-70	-	Contig1583	70622	72040	+	1269	protein_coding	- && sp|A0A455LLW0|ATNJ_ARTSZ FAD-dependent monooxygenase atnJ OS=Arthrinium sp. OX=1756131 GN=atnJ PE=1 SV=1 && - && PF01494:FAD binding domain	FAD_binding_3
FPSE_02896	1374.97045480929	1186.1765074344	1158.61942353919	136.402037137672	123.635869530817	180.720833606286	1239.92212859429	146.919580091592	3.07747080579082	2.50637849391405e-72	1.24522780938812e-70	-	Contig1204	3513	6356	-	2844	protein_coding	- && sp|Q00808|HETE1_PODAS Vegetative incompatibility protein HET-E-1 OS=Podospora anserina OX=2587412 GN=HET-E1 PE=4 SV=1 && - && PF12796:Ankyrin repeats (3 copies)|PF06985:Heterokaryon incompatibility protein (HET)	-
FPSE_10899	2788.47253003359	2411.7640657641	1899.29395121693	314.773931856167	287.525277978645	271.580479231546	2366.51018233821	291.293229688786	3.02254892639654	3.06192849172435e-72	1.51529578365843e-70	-	Contig1657	9842	10729	+	888	protein_coding	- && - && - && PF13489:Methyltransferase domain	-
FPSE_02227	342.728623691402	605.584440586441	476.076320225878	6481.19525691847	5836.76314296649	8275.21695540827	474.79646150124	6864.39178509774	-3.85331173682285	3.63649729996907e-72	1.79263752114039e-70	-	Contig1195	431216	432405	-	1071	protein_coding	- && - && - && -	-
FPSE_03563	3185.95661431474	2988.5111520369	3392.67019782021	10012.9587723447	10478.3795471351	11057.9184098874	3189.04598805728	10516.418909789	-1.72152029343033	5.06036645422901e-72	2.48487529490804e-70	-	Contig1215	209128	211479	+	2352	protein_coding	- && sp|Q08925|MRN1_YEAST RNA-binding protein MRN1 OS=Saccharomyces cerevisiae (strain ATCC 204508 / S288c) OX=559292 GN=MRN1 PE=1 SV=1 && - && PF10378:Putative RRM domain|PF00076:RNA recognition motif. (a.k.a. RRM, RBD, or RNP domain)	RRM_1
FPSE_06860	1121.47295207896	931.446544330574	721.6314748687	68.2010185688361	63.2555611553019	70.8904927405873	924.850323759413	67.4490241549084	3.77787187057735	6.25329962336697e-72	3.05880513237205e-70	-	Contig1359	42952	46701	-	3750	protein_coding	- && - && - && PF06985:Heterokaryon incompatibility protein (HET)	-
FPSE_09027	1538.22284656762	1180.40903657167	939.123183266627	59.8070470526716	30.6693629843888	32.9491022597096	1219.25168880197	41.1418374322567	4.89512468796908	9.10905862002564e-72	4.43856398681173e-70	-	Contig1585	19913	20749	+	837	protein_coding	- && - && - && PF08241:Methyltransferase domain	Methyltransf_11
FPSE_06102	1106.26310191515	738.236270429186	679.536305501359	5.24623219760278	8.62575833935934	6.98920350963536	841.345225948563	6.95373134886583	6.91016564174981	1.14553012759512e-71	5.56042957337262e-70	-	Contig1269	93708	97225	-	3018	protein_coding	- && sp|E9RBG1|ABCC_ASPFU ABC multidrug transporter C OS=Neosartorya fumigata (strain ATCC MYA-4609 / Af293 / CBS 101355 / FGSC A1100) OX=330879 GN=abcC PE=1 SV=1 && - && PF00005:ABC transporter|PF19055:ABC-2 type transporter|PF01061:ABC-2 type transporter	ABC2_membrane
FPSE_12135	2472.10764662614	1847.51316636054	1964.44123714257	342.054339283701	308.610465030412	332.486395529797	2094.68735004309	327.717066614637	2.67648881997345	1.17082795816751e-71	5.66153412290999e-70	-	Contig2173	27768	30269	+	2451	protein_coding	- && sp|A0A2U8U2K7|ASR3_SARSH Transcription factor asR3 OS=Sarocladium schorii OX=2203296 GN=asR3 PE=1 SV=1 && - && PF04082:Fungal specific transcription factor domain|PF00172:Fungal Zn(2)-Cys(6) binuclear cluster domain	Fungal_trans
FPSE_02519	5164.25112562221	5417.57763038918	5441.30177369746	13623.4157707349	14403.0995915436	14311.8918724448	5341.04350990295	14112.8024115744	-1.40181154129699	1.58555165560172e-71	7.63777715772555e-70	-	Contig1199	31039	33010	-	1395	protein_coding	- && sp|G4MT60|GDI1_MAGO7 Rab GDP-dissociation inhibitor OS=Magnaporthe oryzae (strain 70-15 / ATCC MYA-4617 / FGSC 8958) OX=242507 GN=GDI1 PE=1 SV=1 && - && PF00996:GDP dissociation inhibitor	-
FPSE_07892	8.11192008737045	18.263657731972	16.0362549970822	513.081508925551	697.728007894845	813.742980050403	14.1372776054749	674.850832290266	-5.57173117238446	1.67006033631745e-71	8.01439181848704e-70	-	Contig1561	1980	7231	+	4263	protein_coding	- && - && - && PF13472:GDSL-like Lipase/Acylhydrolase family|PF13517:Repeat domain in Vibrio, Colwellia, Bradyrhizobium and Shewanella	-
FPSE_10547	873.045399403245	1266.92109951259	832.882993910958	12477.6386587784	11574.809273827	17840.4411871664	990.949830942263	13964.2963732573	-3.81659892578298	2.02901073677915e-71	9.7002026506623e-70	-	Contig1631	92882	93196	-	246	protein_coding	- && - && - && -	-
FPSE_03685	563.778446072246	573.863350841437	549.241733650066	1786.86668650351	1788.40722902717	1761.27928442811	562.294510187917	1778.85106665293	-1.6614454047823	4.63937462040259e-71	2.20963297240152e-69	-	Contig1216	298463	299002	+	438	protein_coding	- && - && - && -	-
FPSE_04979	514.092935537102	632.499304612506	589.332371142772	2891.72318731865	3428.25973109871	3732.23467414528	578.64153709746	3350.73919752088	-2.53354018791038	5.01597496764036e-71	2.3800519425107e-69	-	Contig1242	28877	30295	+	1263	protein_coding	- && - && - && PF00096:Zinc finger, C2H2 type	zf-C2H2
FPSE_11366	1034.26981113973	1035.26101985968	860.946440155852	150.042240851439	161.972573261303	132.794866683072	976.825757051754	148.269893598605	2.71941672355758	5.61527611984865e-71	2.6544751179986e-69	-	Contig2156	126074	126877	+	804	protein_coding	- && - && - && -	-
FPSE_11412	129.790721397927	161.489184156384	156.353486221552	1753.29080043885	2451.63220356458	1506.67258514854	149.211130591954	1903.86519638399	-3.67317866199646	9.95386419196133e-71	4.6879370055003e-69	-	Contig2156	231249	232755	+	1086	protein_coding	- && sp|S0EG57|ME178_GIBF5 Methyltransferase FFUJ_09178 OS=Gibberella fujikuroi (strain CBS 195.34 / IMI 58289 / NRRL A-6831) OX=1279085 GN=FFUJ_09178 PE=2 SV=1 && - && PF13489:Methyltransferase domain	-
FPSE_12176	1216.78801310557	778.608566468282	676.529507689406	7.34472507664389	11.5010111191458	5.99074586540174	890.642029087752	8.27882735373047	6.74152125544591	1.51273925248354e-70	7.09810873693111e-69	-	Contig2174	67558	68169	-	555	protein_coding	- && - && - && PF06172:Cupin superfamily (DUF985)	-
FPSE_10591	895.353179643513	674.794090939178	698.579358310394	82.8904687221239	71.8813194946612	73.8858656732881	756.242209631028	76.2192179633577	3.31176611724277	1.61224115337542e-70	7.53707866129639e-69	-	Contig1633	63892	65556	+	1665	protein_coding	- && sp|Q9P6Q3|BCS1_SCHPO Probable mitochondrial chaperone bcs1 OS=Schizosaccharomyces pombe (strain 972 / ATCC 24843) OX=284812 GN=SPAC644.07 PE=2 SV=1 && - && PF00004:ATPase family associated with various cellular activities (AAA)|PF08740:BCS1 N terminal	AAA
FPSE_02169	982.556320582746	836.283275095562	671.518178002818	72.3980043269183	52.7129676294182	57.9105433655502	830.119257893709	61.0071717739622	3.76915347458046	1.67082043688673e-70	7.78221474813163e-69	-	Contig1195	299392	300319	+	879	protein_coding	- && sp|Q5SBL1|FSDD_FUSHE Methyltransferase fsdD OS=Fusarium heterosporum OX=42747 GN=fsdD PE=3 SV=2 && - && -	-
FPSE_03239	902.451109719963	1092.93572848696	647.463795507195	9.443217955685	18.2099342719808	26.9583563943078	880.950211238039	18.2038362073246	5.59049622383346	1.90132718352683e-70	8.82341175388331e-69	-	Contig1208	35756	36364	-	609	protein_coding	- && - && - && -	-
FPSE_06878	2260.18373434359	1843.66818578539	1857.19878184958	330.512628448975	325.861981709131	389.398481251113	1987.01690065952	348.59103046974	2.51091500558351	2.32836158211874e-70	1.07656981327965e-68	-	Contig1360	4413	5633	+	1023	protein_coding	- && - && - && PF13460:NAD(P)H-binding	-
FPSE_01127	657.065527077007	759.383663592522	781.767431107758	3870.67011539133	3157.02755220552	3647.36577438543	732.738873925762	3558.35448066076	-2.27959016275655	2.39974129800725e-70	1.10553900016196e-68	-	Contig0354	17509	19953	-	2445	protein_coding	- && - && - && -	-
FPSE_04693	973.430410484454	812.252146500862	848.91924890804	125.909572742467	89.1328361733799	93.8550185579606	878.200601964452	102.965809157936	3.09520422265502	3.93669098515555e-70	1.80702674242521e-68	-	Contig1235	62125	63495	+	1371	protein_coding	- && - && - && PF11951:Fungal specific transcription factor domain	-
FPSE_01736	1013.99001092131	679.600316658118	562.271190835195	14.6894501532878	12.4594287124079	13.9784070192707	751.95383947154	13.7090952949888	5.77958367694216	5.16859781947916e-70	2.36393378249031e-68	-	Contig1190	691958	692522	-	516	protein_coding	- && - && - && PF09351:Domain of unknown function (DUF1993)	-
FPSE_09523	211.923912282553	204.745215626844	200.453187463528	874.022284120622	917.205636751877	956.522423175811	205.707438457642	915.916781349437	-2.15486445571324	5.25219442056041e-70	2.39352701849208e-68	-	Contig1593	191515	194999	-	3438	protein_coding	- && - && - && PF13855:Leucine rich repeat	-
FPSE_06309	5141.94334538194	4354.44050135965	3755.49046712919	612.759920680004	467.707785511929	628.029858222949	4417.29143795693	569.499188138294	2.95582640420725	9.25132519305637e-70	4.20089745056742e-68	-	Contig1273	581458	582681	-	1224	protein_coding	- && sp|B6H6L7|PCEST_PENRW Lovastatin esterase OS=Penicillium rubens (strain ATCC 28089 / DSM 1075 / NRRL 1951 / Wisconsin 54-1255) OX=500485 GN=PcEST PE=1 SV=1 && - && PF00144:Beta-lactamase	Beta-lactamase
FPSE_05644	1243.15175338952	1053.52467759165	1006.27500106691	181.519634037056	141.845803802798	147.771731346576	1100.98381068269	157.045723062143	2.81115646894333	1.11717162059601e-69	5.05480259333243e-68	-	Contig1254	11559	13396	-	1572	protein_coding	- && - && - && PF06985:Heterokaryon incompatibility protein (HET)	-
FPSE_00085	6673.06826187312	3268.23348887921	4778.8039891305	249.720652605892	246.313321468372	174.730087740884	4906.70191329428	223.58802060505	4.45587964949924	1.31936711104083e-69	5.94842061557873e-68	-	Contig0332	257171	257812	+	642	protein_coding	- && - && - && -	-
FPSE_09337	1510.84511627275	1377.46429104821	1105.49932886136	192.012098432262	190.725101059168	196.696155914024	1331.26957872744	193.144451801818	2.78507316045051	1.38656838609191e-69	6.22923222815546e-68	-	Contig1591	30722	33283	+	1698	protein_coding	- && sp|Q5AR55|ASQL_EMENI Cytochrome P450 monooxygenase asqL OS=Emericella nidulans (strain FGSC A4 / ATCC 38163 / CBS 112.46 / NRRL 194 / M139) OX=227321 GN=asqL PE=3 SV=1 && - && PF00067:Cytochrome P450	p450
FPSE_08980	775.702358354799	780.531056755858	800.810483916793	2543.37336939783	2933.71625297544	2805.66598029648	785.681299675817	2760.91853422325	-1.81329928004866	1.56159170480657e-69	6.99074392515706e-68	-	Contig1584	62803	63066	-	264	protein_coding	- && - && - && -	-
FPSE_11057	1721.75503854438	1244.81246120546	938.12091732931	23.0834216694522	37.3782861372238	49.9228822116812	1301.56280569305	36.7948633394524	5.14118610961457	1.66276824511301e-69	7.41746862582279e-68	-	Contig1670	56596	57048	-	453	protein_coding	- && - && - && -	-
FPSE_02471	648.953606989636	526.762338795825	569.287052396419	59.8070470526716	67.0892315283505	69.8920350963536	581.667666060627	65.5961045591253	3.14693955831379	1.93515740031543e-69	8.60228389634954e-68	-	Contig1198	211554	213308	+	1602	protein_coding	- && sp|P49109|FMO5_CAVPO Flavin-containing monooxygenase 5 OS=Cavia porcellus OX=10141 GN=FMO5 PE=1 SV=2 && - && PF00743:Flavin-binding monooxygenase-like	FMO-like
FPSE_01891	4328.72335662306	3764.23598307382	2643.97754264393	303.23222102144	372.824443778976	307.524954423956	3578.97896078027	327.860539741458	3.44792133419708	2.20965742644879e-69	9.78816431317471e-68	-	Contig1192	133386	133934	+	549	protein_coding	- && - && - && -	-
FPSE_10089	692.555177459252	600.778214867501	603.364094265218	80.7919758430828	56.5466380024668	56.9120857213165	632.232495530657	64.7502331889554	3.29140115003945	7.85244397926949e-69	3.46629312799182e-67	-	Contig1610	110951	112825	+	1875	protein_coding	- && - && - && -	-
FPSE_07132	129.790721397927	178.791596744568	170.385209343999	1123.74293672651	1306.32317961631	1466.73427937919	159.655842495498	1298.93346524067	-3.02354350350081	8.87620540769401e-69	3.9046057746554e-67	-	Contig1363	156599	157054	-	456	protein_coding	- && - && - && -	-
FPSE_06370	833.499788977314	622.886853174626	495.119373034914	14.6894501532878	9.58417593262149	13.9784070192707	650.502005062284	12.7506777017267	5.67869842998945	9.23687565412574e-69	4.04920337931208e-67	-	Contig1312	34696	35577	+	882	protein_coding	- && - && - && PF12697:Alpha/beta hydrolase family	-
FPSE_05463	4585.26282938615	4369.82042366026	3639.22761840035	347.300571481304	557.799039278571	408.369176491552	4198.10362381558	437.822929083809	3.26041506916239	1.25346820456423e-68	5.47592713228423e-67	-	Contig1250	123139	125556	-	2175	protein_coding	- && sp|D4B1R0|GCP1_ARTBC Probable glutamate carboxypeptidase ARB_02390 OS=Arthroderma benhamiae (strain ATCC MYA-4681 / CBS 112371) OX=663331 GN=ARB_02390 PE=1 SV=1 && - && PF04253:Transferrin receptor-like dimerisation domain|PF02225:PA domain|PF04389:Peptidase family M28	TFR_dimer
FPSE_01589	1663.95760792186	1229.43253890485	1056.38829793279	114.367861907741	83.382330613807	100.844222067596	1316.59281491984	99.5314715297145	3.72725343468391	2.44922792761453e-68	1.06629789054806e-66	-	Contig1190	250656	251609	+	897	protein_coding	- && sp|A0A2Z5TTA9|HIME_ASPJA Efflux pump himE OS=Aspergillus japonicus OX=34381 GN=himE PE=3 SV=1 && - && PF04479:RTA1 like protein	RTA1
FPSE_03981	1199.55018291991	1237.12250005516	799.808217979476	46.1668433389044	21.0851870517673	44.9305939905131	1078.82696698485	37.3942081270616	4.85610473090171	2.79975664047904e-68	1.21473003007633e-66	-	Contig1220	152845	153813	+	873	protein_coding	- && sp|A4QR21|MCR1_MAGO7 NADH-cytochrome b5 reductase 2 OS=Magnaporthe oryzae (strain 70-15 / ATCC MYA-4617 / FGSC 8958) OX=242507 GN=MCR1 PE=3 SV=1 && - && PF00175:Oxidoreductase NAD-binding domain|PF00970:Oxidoreductase FAD-binding domain	NAD_binding_1
FPSE_04480	1340.49479443797	1037.18351014725	988.234214195192	130.106558500549	151.42997973542	129.799493750371	1121.97083959347	137.112010662113	3.03152938348876	3.66166417224493e-68	1.5832635972072e-66	-	Contig1229	34808	36198	-	1290	protein_coding	- && sp|A0A3G9GX61|CDMI_TALVE FAD-dependent monooxygenase cdmI OS=Talaromyces verruculosus OX=198730 GN=cdmI PE=1 SV=1 && - && PF01494:FAD binding domain	FAD_binding_3
FPSE_06699	148.042541594511	183.597822463508	149.337624660328	939.075563370897	1097.38814428516	944.540931445008	160.325996239449	993.668213033689	-2.63091440075353	4.62912059732111e-68	1.9947730900497e-66	-	Contig1357	91654	92525	-	816	protein_coding	- && - && - && -	-
novel.114	604.338046509099	619.041872599474	460.040065228796	24.1326681089728	19.168351865243	8.98611879810261	561.139994779123	17.4290462574395	5.01358718853186	4.97804053807995e-68	2.13785747718423e-66	-	Contig1190	679114	679690	-	476	-	- && - && -	-
FPSE_08420	728.044827841498	721.89510298479	693.568028623806	2159.3491725333	2150.68907928026	2089.77184938097	714.502653150031	2133.27003373151	-1.57802162692071	5.76214516209528e-68	2.46623706279004e-66	-	Contig1571	44464	46100	+	1539	protein_coding	- && - && - && -	-
FPSE_02839	1223.88594318202	979.508801519974	1117.52652010917	76.5949900850005	81.4654954272827	38.9398481251113	1106.97375493705	65.6667778791315	4.07500634424438	1.06008438477069e-67	4.52195591604708e-66	-	Contig1203	89400	91356	+	1701	protein_coding	- && sp|F4HX15|LPAI_ARATH Phospholipase A I OS=Arabidopsis thaliana OX=3702 GN=PLA1 PE=3 SV=1 && - && PF01734:Patatin-like phospholipase	-
FPSE_03962	2421.40814608008	2094.55316831406	2090.72674524459	342.054339283701	225.228134416605	240.628292260303	2202.22935321291	269.303588653536	3.03315490122145	1.80028401237802e-67	7.65362354121382e-66	-	Contig1220	103560	104363	-	804	protein_coding	- && - && - && PF17784:Sulfotransferase domain	-
novel.350	521.190865613552	502.731210201125	409.926768362914	37.77287182274	38.336703730486	39.9383057693449	477.949614725864	38.6826271075236	3.62692807577587	2.23122064460945e-67	9.45395797543715e-66	-	Contig1250	31850	33754	-	1846	-	- && - && -	-
FPSE_00984	966.332480408005	785.337282474798	698.579358310394	77.6442365245211	52.7129676294182	49.9228822116812	816.749707064399	60.0933621218735	3.76829473490859	2.79657711185956e-67	1.18099451433829e-65	-	Contig0348	114989	115910	+	867	protein_coding	- && - && - && -	-
FPSE_08470	1048.46567129263	764.189889311462	556.257595211289	7.34472507664389	14.3762638989322	8.98611879810261	789.637718605127	10.2357025912262	6.25941150159244	3.01453530047318e-67	1.26880889440846e-65	-	Contig1573	71889	72674	+	786	protein_coding	- && - && - && PF17784:Sulfotransferase domain	-
FPSE_10241	35.4896503822457	99.9694949539522	62.1404881136936	2137.31499730337	2524.4719406525	3664.3395543374	65.8665444832972	2775.37549743109	-5.39449926792061	3.52967106155219e-67	1.48070869797366e-65	-	Contig1618	3162	4443	-	1116	protein_coding	- && sp|S0EGZ9|FFSC6_GIBF5 Terpene cyclase 6 OS=Gibberella fujikuroi (strain CBS 195.34 / IMI 58289 / NRRL A-6831) OX=1279085 GN=Ffsc6 PE=1 SV=1 && - && PF19086:Terpene synthase family 2, C-terminal metal binding	-
FPSE_12128	945.038690178657	537.336035377493	602.361828327901	13.6402037137672	12.4594287124079	13.9784070192707	694.912184628017	13.3593464818153	5.70187824612636	4.6124974418319e-67	1.92857195018377e-65	-	Contig2173	11154	12077	+	924	protein_coding	- && - && - && -	-
FPSE_07857	938.95475011313	1129.4630439509	1712.87248687584	68.2010185688361	67.0892315283505	54.9151704328493	1260.43009364663	63.4018068433453	4.31344205865761	6.80621362961899e-67	2.83644475242247e-65	-	Contig1559	147272	152777	-	3660	protein_coding	- && sp|P49374|HGT1_KLULA High-affinity glucose transporter OS=Kluyveromyces lactis (strain ATCC 8585 / CBS 2359 / DSM 70799 / NBRC 1267 / NRRL Y-1140 / WM37) OX=284590 GN=HGT1 PE=3 SV=1 && - && PF00069:Protein kinase domain|PF00083:Sugar (and other) transporter	Sugar_tr
FPSE_09733	551.610565941191	445.056501573845	430.974353046585	28.329653867055	23.9604398315537	34.9460175481768	475.88047352054	29.0787037489285	4.03415161468788	7.03566132192117e-67	2.92245223893178e-65	-	Contig1595	360453	363656	+	3204	protein_coding	- && - && - && -	-
FPSE_06867	783.81427844217	599.816969723713	532.203212715666	10.4924643952056	11.5010111191458	1.99691528846725	638.611486960516	7.99679693427286	6.31816793374969	1.80412410812286e-66	7.46942755745378e-65	-	Contig1359	75809	76872	-	1014	protein_coding	- && sp|I1RFC6|ZEB2_GIBZE Transcription factor ZEB2 OS=Gibberella zeae (strain ATCC MYA-4620 / CBS 123657 / FGSC 9075 / NRRL 31084 / PH-1) OX=229533 GN=ZEB2 PE=2 SV=1 && - && -	-
FPSE_05060	402.554034335759	326.823348887921	584.321041456183	4673.34364162455	5278.00568609466	4527.00695895525	437.899474893288	4826.11876222482	-3.4625557536209	2.06267357949605e-66	8.51205588880633e-65	-	Contig1244	41782	43416	-	1533	protein_coding	- && sp|C8V0D4|CICH_EMENI Cytochrome P450 monooxygenase cicH OS=Emericella nidulans (strain FGSC A4 / ATCC 38163 / CBS 112.46 / NRRL 194 / M139) OX=227321 GN=cicH PE=1 SV=1 && - && PF00067:Cytochrome P450	p450
FPSE_05298	210.909922271632	224.931363646393	270.611803075762	1139.48163331932	1260.31913513973	1225.10752947466	235.484362997929	1208.3027659779	-2.35951887464164	2.45263079450469e-66	1.00884349141493e-64	-	Contig1247	294546	297223	+	2631	protein_coding	- && - && - && PF00561:alpha/beta hydrolase fold	Abhydrolase_1
FPSE_02241	1084.9693116858	1106.39316049999	836.892057660228	148.992994411919	133.220045463439	134.791781971539	1009.41817661534	139.001607282299	2.86123000312842	3.66762820960255e-66	1.50372756593705e-64	-	Contig1195	458212	459266	-	951	protein_coding	- && sp|B4TMG8|AES_SALSV Acetyl esterase OS=Salmonella schwarzengrund (strain CVM19633) OX=439843 GN=aes PE=3 SV=1 && - && PF07859:alpha/beta hydrolase fold	Abhydrolase_3
FPSE_08477	1590.95032713553	1285.18475724456	1215.7485819663	231.883463134043	229.061804789654	208.677647644827	1363.96122211546	223.207638522841	2.61134465869138	3.93823789933206e-66	1.60946890150445e-64	-	Contig1573	89769	91109	-	1341	protein_coding	- && sp|O94284|HMT2_SCHPO Sulfide:quinone oxidoreductase, mitochondrial OS=Schizosaccharomyces pombe (strain 972 / ATCC 24843) OX=284812 GN=hmt2 PE=3 SV=1 && - && PF07992:Pyridine nucleotide-disulphide oxidoreductase	Pyr_redox_2
FPSE_06618	1859.65768002968	1621.62055757036	1502.39664003914	353.596050118427	367.073938219403	372.424701299142	1661.22495921306	364.364896545657	2.18854292995493	6.90453517136195e-66	2.81265453652683e-64	-	Contig1356	100128	101915	-	1743	protein_coding	- && sp|Q9C1I4|TRI13_FUSSP Cytochrome P450 monooxygenase TRI13 OS=Fusarium sporotrichioides OX=5514 GN=TRI13 PE=2 SV=2 && - && PF00067:Cytochrome P450	p450
FPSE_03813	561.750466050404	431.599069560813	413.935832112185	7.34472507664389	14.3762638989322	13.9784070192707	469.095122574467	11.899798664949	5.29070351955344	2.97234668891705e-65	1.20694423724007e-63	-	Contig1218	198540	200627	+	1938	protein_coding	- && - && - && PF14330:Domain of unknown function (DUF4387)|PF07287:Acyclic terpene utilisation family protein AtuA	-
novel.482	26.363740283954	50.9459926207641	36.081573743435	588.627252571031	548.214863345949	497.231906828345	37.797102216051	544.691340915108	-3.84430370945413	3.5020619383978e-65	1.41749593282945e-63	-	Contig1402	34221	35241	-	824	-	- && - && -	-
FPSE_09816	515.106925548024	515.227397070369	462.044597103431	2169.84163692851	2072.09883663277	2554.05465394961	497.459639907275	2265.33170917029	-2.18696563158409	3.98000716042871e-65	1.60581881259463e-63	-	Contig1600	76887	80582	+	3645	protein_coding	- && sp|Q552M5|GEFY_DICDI Ras guanine nucleotide exchange factor Y OS=Dictyostelium discoideum OX=44689 GN=gefY PE=1 SV=2 && - && PF00617:RasGEF domain|PF00618:RasGEF N-terminal motif	-
FPSE_06916	341.71463368048	499.847474769761	578.307445832277	4068.97769246071	4397.21991788674	3985.84291578062	473.289851427506	4150.68017537603	-3.13234547551864	4.54272585527096e-65	1.82704107493422e-63	-	Contig1360	101830	103045	+	1110	protein_coding	- && sp|Q8J0P4|CRF1_ASPFU Probable glycosidase crf1 OS=Neosartorya fumigata (strain ATCC MYA-4609 / Af293 / CBS 101355 / FGSC A1100) OX=330879 GN=crf1 PE=1 SV=2 && - && PF00722:Glycosyl hydrolases family 16	-
FPSE_01455	2696.19943903975	2815.48702615506	3017.82273726341	695.650389402128	646.931875451951	540.16558553039	2843.16973415274	627.582616794823	2.17988680252443	5.74334254067231e-65	2.30260780530941e-63	-	Contig1163	97522	99474	-	1731	protein_coding	- && - && - && -	-
FPSE_05509	2579.5905877838	2764.54103353429	2127.81058492535	225.587984496919	235.770727942489	131.796409038838	2490.64740208115	197.718373826082	3.65498315779739	6.80723096947483e-65	2.72053025716961e-63	-	Contig1252	36420	38176	+	1557	protein_coding	- && sp|C5H884|RADE_FLOCH Efflux pump radE OS=Floropilus chiversii OX=2587399 GN=radE PE=3 SV=1 && - && PF07690:Major Facilitator Superfamily	MFS_1
FPSE_11393	4439.24826781348	3706.56127444654	3507.93078061174	882.416255636787	900.91253766642	927.567151493036	3884.58010762392	903.631981598748	2.10386041478201	9.15504109249362e-65	3.64733382392458e-63	-	Contig2156	193430	194751	+	1200	protein_coding	- && sp|Q30DW8|EPOA_DOTSE Putative epoxide hydrolase OS=Dothistroma septosporum OX=64363 GN=epoA PE=3 SV=1 && - && PF06441:Epoxide hydrolase N terminus	EHN
FPSE_08919	918.674949894704	1326.51829842744	1026.32031981326	8428.59664866862	6671.54486669782	8335.12441406229	1090.5045227118	7811.75530980958	-2.84039079328829	1.56555004052677e-64	6.21754027066886e-63	-	Contig1583	50	367	+	318	protein_coding	- && - && - && -	-
FPSE_02858	670.247397218983	588.282027998257	532.203212715666	57.7085541736305	62.2971435620397	39.9383057693449	596.910879310969	53.3146678350051	3.48418879240692	1.8548570526424e-64	7.34349499997707e-63	-	Contig1203	131482	134088	+	1968	protein_coding	- && - && - && PF13424:Tetratricopeptide repeat|PF00931:NB-ARC domain	NB-ARC
FPSE_04672	114.580871234108	173.985371025628	159.360284033505	1093.31478998042	1221.98243140924	1362.8946843789	149.308842097747	1226.06396858952	-3.03659390438844	3.29077437468592e-64	1.29877945647651e-62	-	Contig1235	13948	15655	-	1293	protein_coding	- && sp|Q0CZH2|PYTC_ASPTN Methyltransferase pytC OS=Aspergillus terreus (strain NIH 2624 / FGSC A1156) OX=341663 GN=pytC PE=2 SV=2 && - && PF13489:Methyltransferase domain	-
FPSE_09110	806.122058682439	868.965609984354	829.876196099005	2720.6960176768	2515.84618231314	2814.65209909458	834.987954921933	2683.73143302818	-1.68416932147791	3.70729382952476e-64	1.45862439522513e-62	-	Contig1587	109668	113141	-	3474	protein_coding	- && - && - && PF00092:von Willebrand factor type A domain|PF15411:Pleckstrin homology domain	VWA
FPSE_00838	881.157319490615	1264.03736408122	1072.42455292987	7014.21244819491	8041.12360746943	6294.27698924876	1072.53974550057	7116.5376816377	-2.72994660495077	5.73516082858872e-64	2.24949698258175e-62	-	Contig0345	66713	68408	+	1590	protein_coding	- && sp|Q4WRQ4|MFSB_ASPFU Major facilitator superfamily multidrug transporter mfsB OS=Neosartorya fumigata (strain ATCC MYA-4609 / Af293 / CBS 101355 / FGSC A1100) OX=330879 GN=mfsB PE=2 SV=1 && - && PF07690:Major Facilitator Superfamily	MFS_1
FPSE_05059	1669.02755797647	1563.94584894308	1261.85281508291	237.129695331645	200.309276991789	250.61286870264	1498.27540733415	229.350613675358	2.7083872007856	5.9695427002818e-64	2.33420174289723e-62	-	Contig1244	39448	41739	+	2292	protein_coding	- && - && - && PF06985:Heterokaryon incompatibility protein (HET)	-
FPSE_01962	1486.50935601064	1492.81370830277	1654.74106251142	5031.13667750106	5047.98546371174	5698.19777564129	1544.68804227494	5259.10663895136	-1.76754515825764	1.00628771991014e-63	3.92266434570511e-62	-	Contig1193	146905	149398	-	2193	protein_coding	- && - && - && PF04082:Fungal specific transcription factor domain	Fungal_trans
FPSE_01993	510.036975493417	419.102882691569	386.874651804609	9.443217955685	6.70892315283505	10.9830340865699	438.671503329865	9.0450583983633	5.60484274992188	1.07290291758057e-63	4.16951136896574e-62	-	Contig1193	228728	232044	+	1536	protein_coding	- && - && - && -	-
FPSE_03432	1018.04597096499	799.755959631618	712.611081432841	88.1367009197266	98.7170121060014	91.8581032694934	843.471004009817	92.9039387650738	3.18153582717737	1.15736249377212e-63	4.48398331302721e-62	-	Contig1212	160791	163492	+	1680	protein_coding	- && - && - && -	-
FPSE_02388	390.386154204703	367.195644927017	380.861056180703	18.88643591137	8.62575833935934	7.98766115386899	379.480951770808	11.8332851348661	5.01883069635043	1.8764094159368e-63	7.24763136905589e-62	-	Contig1197	215779	216966	-	1011	protein_coding	- && - && - && PF05368:NmrA-like family	NmrA
FPSE_12046	55.7694506006719	62.4809343462202	75.1699452988229	513.081508925551	635.430864332805	557.139365482362	64.4734434152383	568.550579580239	-3.14089009137335	3.66824002479284e-63	1.41255115118847e-61	-	Contig2170	42218	44866	-	2403	protein_coding	- && - && - && -	-
FPSE_10440	613.46395660739	445.056501573845	506.144298345408	45.1175968993839	33.5446157641752	33.9475599039432	521.554918842214	37.5365908558341	3.79988610734817	4.51838819018114e-63	1.73465030246681e-61	-	Contig1627	36884	37783	+	900	protein_coding	- && sp|P87219|SOU1_CANAL Sorbose reductase SOU1 OS=Candida albicans (strain SC5314 / ATCC MYA-2876) OX=237561 GN=SOU1 PE=1 SV=1 && - && PF13561:Enoyl-(Acyl carrier protein) reductase	-
FPSE_07175	3112.94933352841	3230.74492827148	3427.74950562632	8680.41579415355	8557.71069023773	9041.03396853546	3257.1479224754	8759.72015097558	-1.42726552559334	1.19181207478079e-62	4.5616517146217e-61	-	Contig1364	94115	96284	+	1926	protein_coding	- && sp|P39826|CDC3_CANAX Cell division control protein 3 OS=Candida albicans OX=5476 GN=CDC3 PE=3 SV=1 && - && PF00735:Septin	GTP_CDC
FPSE_07040	782.800288431249	742.081251004338	726.642804555288	2238.04265549734	2250.36450897953	2140.69318923689	750.508114663625	2209.70011790459	-1.55800607307227	2.5725888069189e-62	9.81690590206492e-61	-	Contig1362	57608	59206	+	1188	protein_coding	- && sp|S0DX56|EREMS_GIBF5 (+)-eremophilene synthase OS=Gibberella fujikuroi (strain CBS 195.34 / IMI 58289 / NRRL A-6831) OX=1279085 GN=STC3 PE=1 SV=1 && - && PF19086:Terpene synthase family 2, C-terminal metal binding	-
FPSE_01633	1670.04154798739	1531.26351405429	896.025747961969	78.6934829640416	74.7565722744476	86.8658150483252	1365.77693666788	80.1052900956048	4.09192303301937	3.52060720323198e-62	1.33941659632871e-60	-	Contig1190	398736	399665	+	930	protein_coding	- && - && - && -	-
novel.125	405.596004368523	591.165763429622	521.178287405172	2908.51113035098	3177.15432166402	3508.58016183695	505.980018401105	3198.08187128399	-2.65963540203787	3.69837055000385e-62	1.40283402688619e-60	-	Contig1193	153735	156101	+	2266	-	- && - && -	-
FPSE_10548	550.596575930269	993.927478676794	757.713048612135	10861.7991419168	8425.44906236755	13232.5591590282	767.412367739733	10839.9357877709	-3.81994989802254	5.09999123069264e-62	1.92871011646702e-60	-	Contig1631	94467	94821	+	273	protein_coding	- && - && - && -	-
FPSE_10993	1991.47638144945	2576.13698535185	1955.42084370671	13481.7675013996	11039.0538391934	14192.0769551367	2174.344736836	12904.2994319099	-2.56907288007729	5.4533444855284e-62	2.05620301449879e-60	-	Contig1665	35596	37719	+	2124	protein_coding	- && - && - && -	-
FPSE_06126	3417.1463368048	3290.34212718633	3284.4254765899	7803.24577071437	7914.61248515883	8036.58557843644	3330.63798019368	7918.14794476988	-1.24940307290661	9.349589686947e-62	3.51483536332141e-60	-	Contig1273	35278	36544	+	1062	protein_coding	- && sp|Q00580|GPA1_CRYPA Guanine nucleotide-binding protein subunit alpha OS=Cryphonectria parasitica OX=5116 PE=3 SV=3 && - && PF00503:G-protein alpha subunit	G-alpha
FPSE_04247	4669.42400029262	4095.86555768068	3178.18528723423	529.86945195788	354.614509506995	431.333702308925	3981.15828173584	438.6058879246	3.18290885296673	1.83127231808719e-61	6.8640204135641e-60	-	Contig1223	151725	152249	-	525	protein_coding	- && - && - && PF08560:Protein of unknown function (DUF1757)	-
FPSE_01554	876.087369436009	983.353782095126	1066.41095730597	9421.18378045507	6096.49431074053	6893.35157578894	975.284036279034	7470.34322232818	-2.93718814323037	2.04421672259597e-61	7.63958161019714e-60	-	Contig1190	134475	135484	-	798	protein_coding	- && - && - && -	-
FPSE_06632	354.896503822457	371.040625502169	379.858790243385	18.88643591137	31.6277805776509	29.9537293270087	368.598639856004	26.8226486053432	3.77344433976082	3.20618350429535e-61	1.19468055340935e-59	-	Contig1356	137127	137636	-	510	protein_coding	- && - && - && PF13695:Zinc-binding domain	-
FPSE_03719	1419.58601528983	1159.26164340833	1038.34751106107	108.072383270617	161.014155668041	118.816459663801	1205.73172325308	129.300999534153	3.21886385426066	5.60548328939576e-61	2.08257676813357e-59	-	Contig1217	21415	22419	+	1005	protein_coding	- && - && - && -	-
FPSE_04433	1617.31406741948	1484.16250200868	1314.97290976074	271.754827835824	208.935035331149	192.702325337089	1472.1498263963	224.464062834687	2.71469172564281	5.81517581540779e-61	2.15416556740939e-59	-	Contig1227	94187	95398	+	1212	protein_coding	- && sp|P50400|GUND_CELFI Endoglucanase D OS=Cellulomonas fimi OX=1708 GN=cenD PE=3 SV=1 && - && PF00150:Cellulase (glycosyl hydrolase family 5)	-
FPSE_08789	9091.43443792043	10459.3084095573	10272.2235915685	28399.9533785029	29440.6716298267	30269.2419425865	9940.98881301539	29369.9556503054	-1.56286108892942	7.02022588607086e-61	2.59298080905632e-59	-	Contig1578	59406	60542	+	1137	protein_coding	- && - && - && PF11790:Glycosyl hydrolase catalytic core	-
FPSE_05557	973.430410484454	869.926855128142	528.194148966396	28.329653867055	31.6277805776509	17.9722375962052	790.517138192997	25.9765573469704	4.92655738473026	8.78207503300328e-61	3.2343054823581e-59	-	Contig1252	155033	155650	-	618	protein_coding	- && sp|P96579|YDAF_BACSU Putative ribosomal N-acetyltransferase YdaF OS=Bacillus subtilis (strain 168) OX=224308 GN=ydaF PE=1 SV=1 && - && PF13302:Acetyltransferase (GNAT) domain	-
FPSE_07851	792.940188540462	758.422418448734	577.30517989496	64.0040328107539	83.382330613807	62.9028315867183	709.555928961385	70.096398337093	3.33726305701175	1.20778684541387e-60	4.43520334624589e-59	-	Contig1559	133393	135136	-	1629	protein_coding	- && - && - && PF00071:Ras family	Ras
FPSE_07380	688.499217415567	498.886229625973	426.965289297314	23.0834216694522	13.4178463056701	15.975322307738	538.116912112951	17.4921967609534	4.95052496917765	1.28927804728469e-60	4.72076982111265e-59	-	Contig1365	167857	168790	-	828	protein_coding	- && sp|A0A144Y7G4|CITE_MONPU Short chain dehydrogenase mpl6 OS=Monascus purpureus OX=5098 GN=mpl6 PE=1 SV=1 && - && PF00106:short chain dehydrogenase	adh_short
FPSE_11157	640.841686902266	626.731833749778	599.355030515948	105.973890391576	118.843781564507	128.801036106137	622.309517055997	117.872902687407	2.39923710180991	1.54988213075863e-60	5.6586330589571e-59	-	Contig1683	13816	16199	-	2091	protein_coding	- && sp|A0A089FQI6|PRLR_FUNXX Pyrrolocin cluster transcription factor fsdR OS=Fungal sp. (strain NRRL 50135) OX=1547289 GN=prlR PE=3 SV=1 && - && PF04082:Fungal specific transcription factor domain|PF00172:Fungal Zn(2)-Cys(6) binuclear cluster domain	Fungal_trans
FPSE_01972	824.373878879022	843.011991102078	964.179831699568	2962.02269876653	3116.77401328851	2865.5734389505	877.18856722689	2981.45671700185	-1.76515836532761	2.46374903013307e-60	8.96932082263101e-59	-	Contig1193	173755	176103	-	2145	protein_coding	- && - && - && -	-
FPSE_10040	1879.9374802481	1744.65993597522	1761.98351780441	5164.39097532017	5858.80674761152	5916.85999972845	1795.52697800925	5646.68590755338	-1.65312764792083	2.50501249578738e-60	9.09341069029522e-59	-	Contig1609	50891	52180	-	1095	protein_coding	- && sp|Q4I1Y5|MPG1_GIBZE Mannose-1-phosphate guanyltransferase OS=Gibberella zeae (strain ATCC MYA-4620 / CBS 123657 / FGSC 9075 / NRRL 31084 / PH-1) OX=229533 GN=MPG1 PE=3 SV=1 && - && PF00483:Nucleotidyl transferase|PF00132:Bacterial transferase hexapeptide (six repeats)	Hexapep
FPSE_02822	511.050965504338	451.785217580361	357.808939622397	19.9356823508905	10.5425935258836	10.9830340865699	440.215040902366	13.820436654448	5.00412686452484	3.06324967273428e-60	1.10880886011059e-58	-	Contig1203	46289	47319	-	981	protein_coding	- && - && - && PF00561:alpha/beta hydrolase fold	Abhydrolase_1
FPSE_06397	9023.4971071887	9543.24178752729	9811.18126040237	25602.6623707411	29243.2376056147	28365.183215033	9459.30671837279	27737.0277304629	-1.55201619619362	3.12335036331956e-60	1.12734261404261e-58	-	Contig1323	9025	10741	+	1350	protein_coding	- && sp|Q5I2J3|TBA_GIBZE Tubulin alpha chain OS=Gibberella zeae (strain ATCC MYA-4620 / CBS 123657 / FGSC 9075 / NRRL 31084 / PH-1) OX=229533 GN=TUB1 PE=3 SV=2 && - && PF00091:Tubulin/FtsZ family, GTPase domain|PF03953:Tubulin C-terminal domain	Tubulin
FPSE_01156	722.974877786891	542.142261096433	621.404881136936	83.9397151616444	78.5902426474962	80.8750691829235	628.840673340087	81.1350089973547	2.95460149618313	3.2865065365627e-60	1.18286225317366e-58	-	Contig0354	130735	132287	-	1446	protein_coding	- && sp|B8N0F1|ASAE_ASPFN MFS transporter asaE OS=Aspergillus flavus (strain ATCC 200026 / FGSC A1120 / NRRL 3357 / JCM 12722 / SRRC 167) OX=332952 GN=asaE PE=2 SV=1 && - && PF07690:Major Facilitator Superfamily	MFS_1
FPSE_00673	633.743756825816	563.289654259769	553.250797399337	91.2844402382883	78.5902426474962	99.8457644233624	583.428069494974	89.9068157697156	2.69921774083119	4.1084524366801e-60	1.47450379377621e-58	-	Contig0343	19266	22490	+	3135	protein_coding	- && - && - && PF12770:CHAT domain	-
FPSE_00732	699.653107535701	613.274401736746	598.35276457863	105.973890391576	118.843781564507	103.839595000297	637.093424617026	109.552422318793	2.53868031344762	5.00716484974519e-60	1.79197094580288e-58	-	Contig0343	159334	163258	+	3816	protein_coding	- && sp|Q5VJL3|GDT9_DICDI Probable serine/threonine-protein kinase gdt9 OS=Dictyostelium discoideum OX=44689 GN=gdt9 PE=2 SV=2 && - && PF00069:Protein kinase domain|PF12796:Ankyrin repeats (3 copies)|PF13857:Ankyrin repeats (many copies)	Pkinase
FPSE_00756	603.324056498177	414.296656972629	491.110309285643	23.0834216694522	29.7109453911266	14.9768646635044	502.910340918816	22.5904105746944	4.47288580143248	5.85541876951958e-60	2.08964226453644e-58	-	Contig0343	223569	225725	+	1835	protein_coding	- && sp|Q9FF61|SM3L1_ARATH Putative SWI/SNF-related matrix-associated actin-dependent regulator of chromatin subfamily A member 3-like 1 OS=Arabidopsis thaliana OX=3702 GN=At5g05130 PE=2 SV=1 && - && PF00176:SNF2 family N-terminal domain	SNF2_N
FPSE_01594	1242.1377633786	1567.79082951823	1407.18137599396	5678.52173068524	5687.24999841759	5127.08000313966	1405.7033229636	5497.61724408083	-1.96731819693794	1.07454666862007e-59	3.8239976811089e-58	-	Contig1190	275932	277602	-	1671	protein_coding	- && - && - && -	-
FPSE_06101	711.820987666757	870.88810027193	876.982695152934	139.549776456234	105.425935258836	111.827256154166	819.89726103054	118.934322623079	2.78758850871765	1.7492909339384e-59	6.20777782690913e-58	-	Contig1269	92696	93374	-	633	protein_coding	- && - && - && PF01965:DJ-1/PfpI family	DJ-1_PfpI
FPSE_05158	765.562458245586	839.167010526926	872.973631403663	2546.52110871639	2832.12398808965	2754.74464044057	825.901033392059	2711.12991241554	-1.71486253162286	2.26124028637923e-59	8.00213776204985e-58	-	Contig1245	119365	120969	+	1605	protein_coding	- && - && - && PF00251:Glycosyl hydrolases family 32 N-terminal domain	-
FPSE_01863	748.324628059924	906.454170592086	873.975897340981	4695.37781685448	3727.2860201965	4991.28976352388	842.918231997664	4471.31786685829	-2.40701673808752	2.49272162713086e-59	8.79673824348772e-58	-	Contig1192	66950	68642	+	1497	protein_coding	- && sp|A0A1D8PN12|GIT2_CANAL Glycerophosphodiester transporter GIT2 OS=Candida albicans (strain SC5314 / ATCC MYA-2876) OX=237561 GN=GIT2 PE=2 SV=1 && - && PF00083:Sugar (and other) transporter	Sugar_tr
FPSE_07041	2308.85525486781	1993.62242821632	2147.8559036717	6484.34299623703	6365.8096544472	6936.28525449098	2150.11119558528	6595.47930172507	-1.61717857647838	3.03422788056669e-59	1.0677953616361e-57	-	Contig1362	60016	61539	+	1314	protein_coding	- && - && - && PF04082:Fungal specific transcription factor domain	Fungal_trans
FPSE_11710	1254.30564350966	1392.84421334882	1418.20630130446	4550.58180820065	5042.23495815217	4316.33239602195	1355.11871938764	4636.38305412492	-1.77455536577017	7.41577469166077e-59	2.60250552821746e-57	-	Contig2162	72499	73623	-	1125	protein_coding	- && - && - && PF06094:Gamma-glutamyl cyclotransferase, AIG2-like	-
FPSE_02969	544.512635864741	552.715957678101	539.21907427689	1706.07471066042	1891.91632909948	1987.92916966914	545.482555939911	1861.97340314302	-1.77133133178256	7.84079351381417e-59	2.74406113332905e-57	-	Contig1205	125256	126356	+	891	protein_coding	- && sp|Q2H7Q1|CHS7_CHAGB Chitin synthase export chaperone OS=Chaetomium globosum (strain ATCC 6205 / CBS 148.51 / DSM 1962 / NBRC 6347 / NRRL 1970) OX=306901 GN=CHS7 PE=3 SV=1 && - && PF12271:Chitin synthase export chaperone	-
FPSE_03067	9617.69525358859	7897.59010136223	7505.9696045718	2127.87177934769	1960.92239581436	2071.79961178477	8340.41831984087	2053.5312623156	2.02206647029047	1.01220636955369e-58	3.53268388316137e-57	-	Contig1205	384732	386290	+	1503	protein_coding	- && sp|Q09780|KIME_SCHPO Putative mevalonate kinase OS=Schizosaccharomyces pombe (strain 972 / ATCC 24843) OX=284812 GN=erg12 PE=2 SV=1 && - && PF00288:GHMP kinases N terminal domain|PF08544:GHMP kinases C terminal	GHMP_kinases
FPSE_07373	1055.56360136908	673.83284579539	744.683591427006	5.24623219760278	1.9168351865243	3.99383057693449	824.693346197158	3.71896598702052	7.81000361330905	2.03189234275558e-58	7.07199013471716e-57	-	Contig1365	152047	153845	+	1593	protein_coding	- && sp|G3Y416|YANC_ASPNA Cytochrome P450 monooxygenase yanC OS=Aspergillus niger (strain ATCC 1015 / CBS 113.46 / FGSC A1144 / LSHB Ac4 / NCTC 3858a / NRRL 328 / USDA 3528.7) OX=380704 GN=yanC PE=1 SV=1 && - && PF00067:Cytochrome P450	p450
FPSE_11159	1099.1651718387	1003.53993011467	1008.27953294154	279.099552912468	266.440090926878	241.626749904537	1036.99487829831	262.388797914627	1.98291190760856	2.57199613221619e-58	8.9272928764512e-57	-	Contig1683	18811	19523	-	669	protein_coding	- && - && - && PF13911:AhpC/TSA antioxidant enzyme	-
FPSE_05797	1878.92349023718	2181.06523125498	1925.35286558718	5984.90169102525	6468.36033692625	6566.85592612454	1995.11386235978	6340.03931802534	-1.66791991532697	2.71236439463111e-58	9.38878265453048e-57	-	Contig1262	46247	48041	-	1584	protein_coding	- && sp|A5H0J3|URC4_LACKL Uracil catabolism protein 4 OS=Lachancea kluyveri OX=4934 GN=URC4 PE=3 SV=1 && - && PF07958:Protein of unknown function (DUF1688)	-
FPSE_03822	1176.22841266872	1024.68732327801	1025.31805387594	199.356823508905	134.178463056701	159.75322307738	1075.41126327422	164.429503214329	2.71157559728341	2.93964459344704e-58	1.01477812954715e-56	-	Contig1218	224967	226104	+	1071	protein_coding	- && sp|A3KG59|P20D2_MOUSE Peptidase M20 domain-containing protein 2 OS=Mus musculus OX=10090 GN=Pm20d2 PE=1 SV=1 && - && -	-
FPSE_05278	288.987153112572	379.691831796261	362.820269308985	1490.97919055871	1616.85047983325	1614.50601072577	343.833084739273	1574.11189370591	-2.19425944072972	3.06530245721469e-58	1.05528034865361e-56	-	Contig1247	232887	233873	+	939	protein_coding	- && - && - && -	-
FPSE_07379	2125.32306289106	1697.55892392961	1616.65495689335	296.936742384317	213.727123297459	210.674562933295	1813.17898123801	240.44614287169	2.91596091171112	3.64703258381109e-58	1.25214785377514e-56	-	Contig1365	166644	167300	-	480	protein_coding	- && - && - && PF07883:Cupin domain	Cupin_2
FPSE_03258	1008.9200608667	794.949733912678	684.547635187947	58.7578006131511	53.6713852226804	84.868899759858	829.472476655775	65.7660285318965	3.65705286597064	4.48485420268384e-58	1.5356383214541e-56	-	Contig1208	80091	80537	+	447	protein_coding	- && - && - && -	-
FPSE_05363	336.644683625874	378.730586652473	371.840662744844	35.6743789436989	41.2119565102724	36.9429328366441	362.40531100773	37.9430894302051	3.25390845951817	5.3867624271059e-58	1.83948499161738e-56	-	Contig1247	461642	462688	+	1047	protein_coding	- && sp|O42909|YBI2_SCHPO Zinc-type alcohol dehydrogenase-like protein C16A3.02c OS=Schizosaccharomyces pombe (strain 972 / ATCC 24843) OX=284812 GN=SPBC16A3.02c PE=3 SV=1 && - && PF13602:Zinc-binding dehydrogenase	-
FPSE_11959	1649.76174776897	992.966233533006	727.645070492606	41.9698575808222	34.5030333574374	33.9475599039432	1123.45768393153	36.8068169474009	4.93328611645021	7.41615780911047e-58	2.52568019579625e-56	-	Contig2167	23951	25957	-	1743	protein_coding	- && sp|P96712|BMR3_BACSU Multidrug resistance protein 3 OS=Bacillus subtilis (strain 168) OX=224308 GN=bmr3 PE=1 SV=1 && - && PF07690:Major Facilitator Superfamily	MFS_1
FPSE_05859	5686.45598124669	5741.51724384574	5126.59026937972	2012.45467100042	1929.29461523671	1990.92454260185	5518.18783149072	1977.55794294633	1.4805657384444	7.84409604818012e-58	2.66425878912584e-56	-	Contig1264	74172	76646	+	2349	protein_coding	- && sp|O22397|POT1_ARATH Potassium transporter 1 OS=Arabidopsis thaliana OX=3702 GN=POT1 PE=1 SV=2 && - && PF02705:K+ potassium transporter	K_trans
FPSE_08716	236.259672544664	232.621324796697	259.586877765268	1409.13796827611	1465.42050009783	1110.28490038779	242.822625035543	1328.28112292057	-2.45176238556182	8.79191863273964e-58	2.97820366733098e-56	-	Contig1576	327096	328043	+	948	protein_coding	- && sp|I1S5P3|WOR1_GIBZE Global transcription regulator FGP1 OS=Gibberella zeae (strain ATCC MYA-4620 / CBS 123657 / FGSC 9075 / NRRL 31084 / PH-1) OX=229533 GN=FGP1 PE=3 SV=1 && - && PF09729:Gti1/Pac2 family	-
FPSE_12249	3944.42114248388	2886.61916679537	2010.54547025918	183.618126916097	232.895475162702	162.748596010081	2947.19525984615	193.08739936296	3.93141159789825	9.15535928707025e-58	3.09304658154381e-56	-	Contig2179	36245	38189	+	1851	protein_coding	- && sp|Q9P6Q3|BCS1_SCHPO Probable mitochondrial chaperone bcs1 OS=Schizosaccharomyces pombe (strain 972 / ATCC 24843) OX=284812 GN=SPAC644.07 PE=2 SV=1 && - && PF08740:BCS1 N terminal|PF00004:ATPase family associated with various cellular activities (AAA)	AAA
FPSE_08675	475.561315122093	444.095256430057	406.919970550961	49.3145826574661	63.2555611553019	54.9151704328493	442.192180701037	55.8284380818724	2.9826221321567	1.5574007863755e-57	5.24752940494448e-56	-	Contig1576	198588	199226	-	585	protein_coding	- && - && - && -	-
novel.29	1398.29222506048	965.090124363154	937.118651391992	83.9397151616444	115.96852878472	109.830340865699	1100.16700027188	103.246194937354	3.41164245283	2.12311590272788e-57	7.1346831224561e-56	-	Contig0339	38377	41120	+	2683	-	- && - && -	-
FPSE_04708	761.506498201901	836.283275095562	766.733442047994	198.307577069385	184.016177906333	192.702325337089	788.174405115152	191.675360104269	2.04064354638806	2.2024930459623e-57	7.38184772468159e-56	-	Contig1235	99528	100480	+	846	protein_coding	- && sp|P16542|DHK1_STRVN Granaticin polyketide synthase putative ketoacyl reductase 1 OS=Streptomyces violaceoruber OX=1935 GN=gra-orf5 PE=3 SV=1 && - && PF00106:short chain dehydrogenase	adh_short
FPSE_03117	5426.87453845083	7164.16005665198	5827.17415956475	25610.0070958177	24115.7034816622	26260.4345009885	6139.40291822252	25328.7150261561	-2.04454628500079	1.081801009231e-56	3.61618390130541e-55	-	Contig1206	111302	112979	-	1626	protein_coding	- && sp|Q54N49|INO1_DICDI Inositol-3-phosphate synthase OS=Dictyostelium discoideum OX=44689 GN=ino1 PE=3 SV=1 && - && PF07994:Myo-inositol-1-phosphate synthase|PF01658:Myo-inositol-1-phosphate synthase	-
FPSE_03433	603.324056498177	1057.3696581668	761.722112361405	12590.9572742467	8529.91658003313	15260.4266344667	807.471942342128	12127.1001629155	-3.90845558427871	1.12667670470632e-56	3.75628083471695e-55	-	Contig1212	164963	165661	-	537	protein_coding	- && - && - && -	-
FPSE_09133	973.430410484454	1042.95098100998	1052.37923418352	3134.0991148479	3736.87019612912	3627.39662150075	1022.92020855932	3499.45531082592	-1.77449488295539	1.24071962247947e-56	4.1256369808904e-55	-	Contig1588	53020	53913	-	894	protein_coding	- && sp|O13493|MYB1_NEUCR Myb-like DNA-binding protein myb-1 OS=Neurospora crassa (strain ATCC 24698 / 74-OR23-1A / CBS 708.71 / DSM 1257 / FGSC 987) OX=367110 GN=rca-1 PE=3 SV=2 && - && PF00249:Myb-like DNA-binding domain	Myb_DNA-binding
FPSE_08809	40.5596004368523	61.5196892024322	75.1699452988229	1120.59519740795	768.650909796244	776.800047213759	59.0830783127024	888.682051472652	-3.9097305949052	1.58295406064554e-56	5.24985471055454e-55	-	Contig1579	43989	45910	-	1872	protein_coding	- && sp|P9WIB0|PHLC_MYCTO Phospholipase C C OS=Mycobacterium tuberculosis (strain CDC 1551 / Oshkosh) OX=83331 GN=plcC PE=1 SV=1 && - && PF04185:Phosphoesterase family	Phosphoesterase
FPSE_08240	33336.9495890598	24319.5021378365	19048.0641387217	2607.37740220858	2091.26718849801	1642.46282476431	25568.171955206	2113.70247182363	3.59657611738048	1.81068405561037e-56	5.98944028734407e-55	-	Contig1566	148135	150208	+	1740	protein_coding	- && sp|Q4I1N3|MET3_GIBZE Sulfate adenylyltransferase OS=Gibberella zeae (strain ATCC MYA-4620 / CBS 123657 / FGSC 9075 / NRRL 31084 / PH-1) OX=229533 GN=MET3 PE=3 SV=2 && - && PF14306:PUA-like domain|PF01583:Adenylylsulphate kinase|PF01747:ATP-sulfurylase	-
FPSE_12154	1078.88537162027	1043.91222615377	912.062002959051	153.189980170001	166.764661227614	108.831883221465	1011.61986691103	142.928841539693	2.82290110164268	1.94494795449159e-56	6.41680875923281e-55	-	Contig2174	16008	16946	+	837	protein_coding	- && sp|D4B5F9|PGDA_ARTBC Probable peptidoglycan-N-acetylglucosamine deacetylase ARB_03699 OS=Arthroderma benhamiae (strain ATCC MYA-4681 / CBS 112371) OX=663331 GN=ARB_03699 PE=1 SV=2 && - && PF01522:Polysaccharide deacetylase	Polysacc_deac_1
FPSE_11373	842.625699075606	666.142884645086	658.488720817689	118.564847665823	110.218023225147	113.824171442633	722.419101512793	114.202347444534	2.66162058945301	2.21633224218612e-56	7.29317225357299e-55	-	Contig2156	139517	140955	+	1254	protein_coding	- && - && - && -	-
FPSE_03262	924.758889960231	739.197515572974	650.470593319147	97.5799188754116	84.3407482070691	102.841137356063	771.475666284118	94.9206014795147	3.02368115273132	3.32811986346186e-56	1.09233032513467e-54	-	Contig1208	89627	92367	+	2094	protein_coding	- && - && - && -	-
FPSE_00534	776.716348365721	812.252146500862	709.604283620888	140.599022895754	94.8833417329528	118.816459663801	766.19092616249	118.099608097503	2.70068223204328	3.7258102843806e-56	1.21969742875498e-54	-	Contig0340	54052	54626	+	360	protein_coding	- && - && - && PF07080:Protein of unknown function (DUF1348)	-
FPSE_08263	257.553462774012	297.024749430493	281.636728386256	1331.49373175158	1205.68933232378	1554.59855207175	278.738313530254	1363.92720538237	-2.29032166897223	3.77292344968144e-56	1.23193729855707e-54	-	Contig1566	197412	198798	+	1338	protein_coding	- && sp|Q6U1Z4|CMT1_CRYNJ Alpha-1,3-mannosyltransferase CMT1 OS=Cryptococcus neoformans var. neoformans serotype D (strain JEC21 / ATCC MYA-565) OX=214684 GN=CMT1 PE=1 SV=1 && - && PF11735:Cryptococcal mannosyltransferase 1	-
FPSE_06577	1134.65482222094	979.508801519974	1104.49706292404	4242.1033549816	4431.72295124418	3637.38119794309	1072.88689555498	4103.73583472296	-1.93562684542559	4.5224000075191e-56	1.47286081478816e-54	-	Contig1355	196330	197043	-	714	protein_coding	- && - && - && -	-
FPSE_03335	4785.01886153764	3836.32936885792	3212.26232910303	591.774991889593	619.137765247348	473.268923366738	3944.5368531662	561.393893501226	2.81270005000054	4.96805250584e-56	1.61385274862787e-54	-	Contig1210	51007	52080	+	1074	protein_coding	- && sp|Q5BCG1|DPNP_EMENI 3'(2'),5'-bisphosphate nucleotidase OS=Emericella nidulans (strain FGSC A4 / ATCC 38163 / CBS 112.46 / NRRL 194 / M139) OX=227321 GN=AN1769 PE=1 SV=1 && - && PF00459:Inositol monophosphatase family	-
FPSE_07754	398.498074292073	481.583817037789	481.087649912467	60.8562934921922	58.4634731889911	61.9043739424847	453.72318041411	60.408046874556	2.90966327621495	6.39763287126116e-56	2.07293122368306e-54	-	Contig1465	820	4136	+	1818	protein_coding	- && - && - && -	-
FPSE_12292	1457.10364569392	1047.75720672892	984.225150445921	154.239226609522	152.388397328682	150.767104279277	1163.02866762292	152.464909405827	2.93127444117267	7.68397625897462e-56	2.48337487818749e-54	-	Contig2184	11890	12666	-	717	protein_coding	- && - && - && PF00583:Acetyltransferase (GNAT) family	Acetyltransf_1
FPSE_05726	12246.9713519075	16175.8332796645	14534.8606229804	3305.12628448975	3700.45032758516	3433.69583851943	14319.2217515175	3479.75748353145	2.04085637683572	8.17235145427599e-56	2.63449161766469e-54	-	Contig1259	10599	11381	-	726	protein_coding	- && - && - && -	-
FPSE_09349	1622.38401747409	1191.94397829712	1103.49479698672	140.599022895754	129.38637509039	176.727003029351	1305.94093091931	148.904133671832	3.13279645962912	9.83241276798291e-56	3.16159485679126e-54	-	Contig1591	57401	58006	-	606	protein_coding	- && sp|Q9KBN7|Y1888_BACHD UPF0157 protein BH1888 OS=Bacillus halodurans (strain ATCC BAA-125 / DSM 18197 / FERM 7344 / JCM 9153 / C-125) OX=272558 GN=BH1888 PE=3 SV=1 && - && PF04229:GrpB protein	-
FPSE_01249	730.072807863341	714.205141834486	741.676793615053	1928.51495583878	1945.58771432216	1915.04176164009	728.651581104293	1929.71481060034	-1.4051932526819	1.12166472472937e-55	3.59249034816951e-54	-	Contig0356	75522	77120	+	1599	protein_coding	- && - && - && -	-
FPSE_06774	524.232835646315	479.661326750213	493.114841160278	81.8412222826033	76.6734074609719	57.9105433655502	499.003001185602	72.1417243697085	2.79097374384947	1.12291907638734e-55	3.59249034816951e-54	-	Contig1358	9150	11099	-	1893	protein_coding	- && - && - && -	-
FPSE_07017	976.472380517218	1300.56467954517	1398.16098255811	8427.5474022291	6482.73660082518	8016.61642555176	1225.06601420683	7642.30014286868	-2.64101890520588	1.16340138013976e-55	3.71262772921678e-54	-	Contig1362	34	428	-	395	protein_coding	- && - && - && -	-
FPSE_02496	5376.17503790477	4355.40174650344	3626.19816121522	636.892588788977	414.994817882511	496.233449184111	4452.59164854114	516.0402852852	3.10970850597747	1.25360887233388e-55	3.99044492552713e-54	-	Contig1198	303543	305147	-	1605	protein_coding	- && - && - && PF12937:F-box-like	-
FPSE_09126	697.625127513859	592.12700857341	798.805952042158	3019.73125294016	2837.87449364922	3012.34671265284	696.186029376475	2956.65081974741	-2.08670408793497	1.71834212012597e-55	5.45605922803907e-54	-	Contig1588	28011	29693	-	1683	protein_coding	- && sp|O94673|GPC1_SCHPO Glycerophosphocholine acyltransferase 1 OS=Schizosaccharomyces pombe (strain 972 / ATCC 24843) OX=284812 GN=gpc1 PE=3 SV=2 && - && PF10998:Protein of unknown function (DUF2838)	-
FPSE_10368	4038.72221349956	3671.95644927017	4161.40817174284	11200.7057418819	11021.8023225147	10410.917856424	3957.36227817086	10877.8086402735	-1.45883136558146	2.98779531717017e-55	9.46309471830722e-54	-	Contig1624	10702	12390	-	1689	protein_coding	- && - && - && -	-
FPSE_11218	4297.2896662845	3569.10321888485	2979.73663164534	640.040328107539	560.674292058357	480.258126876373	3615.3765056049	560.32424901409	2.69007204993832	6.57839523732765e-55	2.07834636562853e-53	-	Contig1696	10520	11608	-	1026	protein_coding	- && sp|Q96GA7|SDSL_HUMAN Serine dehydratase-like OS=Homo sapiens OX=9606 GN=SDSL PE=1 SV=1 && - && PF00291:Pyridoxal-phosphate dependent enzyme	PALP
FPSE_08636	303.183013265471	301.830975149433	364.82480118362	1400.74399675994	1786.49039384065	1726.33326687994	323.279596532841	1637.85588582684	-2.34133975507866	7.67702704401206e-55	2.41940934379574e-53	-	Contig1576	71511	73937	+	2427	protein_coding	- && - && - && -	-
FPSE_00697	9618.70924359951	5625.20658144739	5121.57893969313	551.903627187812	351.739256727209	404.375345914618	6788.49825491335	436.006076609879	3.96114249066573	1.73962420930623e-54	5.46880871158826e-53	-	Contig0343	75270	77097	-	1719	protein_coding	- && sp|Q9C1I4|TRI13_FUSSP Cytochrome P450 monooxygenase TRI13 OS=Fusarium sporotrichioides OX=5514 GN=TRI13 PE=2 SV=2 && - && PF00067:Cytochrome P450	p450
FPSE_10519	517.134905569866	577.708331416589	483.092181787102	84.988961601165	78.5902426474962	93.8550185579606	525.978472924519	85.8114076022073	2.61666565675823	2.67070648698623e-54	8.3750446741655e-53	-	Contig1631	19585	21601	+	1908	protein_coding	- && sp|Q00526|CDK3_HUMAN Cyclin-dependent kinase 3 OS=Homo sapiens OX=9606 GN=CDK3 PE=1 SV=1 && - && PF00069:Protein kinase domain	Pkinase
FPSE_08874	26698.356987558	20477.4052981158	20852.1428258935	5199.01610782435	4386.67732436086	5181.99517357251	22675.9683705224	4922.5628685859	2.20372172141537	3.00351459172819e-54	9.39543860805047e-53	-	Contig1582	7687	9840	-	2097	protein_coding	- && - && - && -	-
FPSE_04699	742.240687994396	491.196268475669	408.924502425597	11.5417108347261	4.79208796631075	6.98920350963536	547.453819631887	7.77433410355741	6.15175752987968	3.26415789951493e-54	1.01856198100874e-52	-	Contig1235	76626	77372	-	747	protein_coding	- && - && - && -	-
FPSE_06185	1461.1596057376	1852.31939207948	2062.6632989997	8049.8186840017	9326.36160003398	9221.75480214175	1792.04743227226	8865.97836205914	-2.30663563621977	3.87270028464758e-54	1.20548500998035e-52	-	Contig1273	235688	236287	-	600	protein_coding	- && - && - && -	-
FPSE_12051	326.504783516661	331.629574606861	454.02646960489	1902.28379485077	1955.17189025478	1836.16360774563	370.720275909471	1897.87309761706	-2.35621392817078	3.93612430131968e-54	1.22222447974066e-52	-	Contig2170	57201	57546	+	237	protein_coding	- && - && - && -	-
FPSE_03307	62.867380677121	90.3570435160722	97.2197959198109	673.616214172196	581.759479110125	605.065332405576	83.4814067043347	620.147008562632	-2.89162873638032	5.4315168682598e-54	1.68244222992624e-52	-	Contig1209	109896	110675	-	780	protein_coding	- && sp|A0A411KUU9|UCSE_ACRSP Short-chain dehydrogenase/reductase ucsE OS=Acremonium sp. OX=2046025 GN=ucsE PE=3 SV=1 && - && PF13561:Enoyl-(Acyl carrier protein) reductase	-
FPSE_01445	470.491365067486	702.67020010903	705.595219871618	4027.00783487989	3937.17947312091	3571.48299342367	626.252261682711	3845.22343380816	-2.61795716697783	5.63370809541902e-54	1.74081580148448e-52	-	Contig1163	66159	67423	+	1065	protein_coding	- && sp|S0EG57|ME178_GIBF5 Methyltransferase FFUJ_09178 OS=Gibberella fujikuroi (strain CBS 195.34 / IMI 58289 / NRRL A-6831) OX=1279085 GN=FFUJ_09178 PE=2 SV=1 && - && PF13489:Methyltransferase domain	-
FPSE_05343	5.06995005460653	12.496186869244	16.0362549970822	402.910632775893	315.319388183247	443.315194039729	11.2007973069776	387.181738332956	-5.10710430156493	6.21196064889868e-54	1.9148255343284e-52	-	Contig1247	417826	419203	+	1116	protein_coding	- && - && - && -	-
FPSE_05503	377.204284062726	446.978991861421	437.990214607808	1716.56717505563	2227.36248674123	1930.01862630359	420.724496843985	1957.98276270015	-2.21835448451641	8.42680417350971e-54	2.59124228335424e-52	-	Contig1252	18845	20227	+	1239	protein_coding	- && sp|B6H6L7|PCEST_PENRW Lovastatin esterase OS=Penicillium rubens (strain ATCC 28089 / DSM 1075 / NRRL 1951 / Wisconsin 54-1255) OX=500485 GN=PcEST PE=1 SV=1 && - && PF00144:Beta-lactamase	Beta-lactamase
FPSE_05542	1128.57088215541	714.205141834486	711.608815495523	46.1668433389044	58.4634731889911	29.9537293270087	851.461613161808	44.8613486183014	4.24447373940552	1.02180411263457e-53	3.13443978280081e-52	-	Contig1252	109015	113926	+	4413	protein_coding	- && sp|P9WEU3|AFR2_CRYGR ABC multidrug transporter AFR2 OS=Cryptococcus gattii serotype B (strain R265) OX=294750 GN=AFR2 PE=1 SV=1 && - && PF00005:ABC transporter|PF06422:CDR ABC transporter|PF14510:ABC-transporter N-terminal|PF01061:ABC-2 type transporter	ABC2_membrane
FPSE_07746	1531.12491649117	1382.27051676715	1478.34225754352	3818.2077934153	3947.72206664679	3748.20999645302	1463.91256360061	3838.04661883837	-1.39072700928565	1.40336302564687e-53	4.29449424442516e-52	-	Contig1458	170085	172098	-	1956	protein_coding	- && - && - && -	-
FPSE_09280	3174.80272419461	2037.83970483057	1279.89360195462	96.5306724358911	103.509100072312	101.84267971183	2164.17867699327	100.627484073344	4.42645267400434	2.09608151320085e-53	6.39885703391364e-52	-	Contig1590	87174	88942	-	1398	protein_coding	- && sp|Q9US37|YFZ4_SCHPO Uncharacterized transporter C1039.04 OS=Schizosaccharomyces pombe (strain 972 / ATCC 24843) OX=284812 GN=SPAC1039.04 PE=3 SV=1 && - && PF07690:Major Facilitator Superfamily	MFS_1
FPSE_00365	1593.99229716829	1045.83471644135	1040.35204293571	118.564847665823	70.922901901399	76.881238605989	1226.72635218178	88.7896627244036	3.79094916255237	2.34403100292592e-53	7.13858864809338e-52	-	Contig0337	97209	98365	-	1098	protein_coding	- && sp|P45699|GUNK_FUSOX Putative endoglucanase type K OS=Fusarium oxysporum OX=5507 PE=2 SV=1 && - && PF00734:Fungal cellulose binding domain|PF02015:Glycosyl hydrolase family 45	-
FPSE_04335	657.065527077007	793.98848876889	735.663197991147	2299.94819542906	2381.66771925644	2454.20888952625	728.905737945681	2378.60826807058	-1.70601491644492	2.77001357006735e-53	8.41565993265786e-52	-	Contig1225	4357	6229	+	1827	protein_coding	- && sp|Q9US39|YFZ2_SCHPO Uncharacterized protein C1039.02 OS=Schizosaccharomyces pombe (strain 972 / ATCC 24843) OX=284812 GN=SPAC1039.02 PE=3 SV=1 && - && PF00149:Calcineurin-like phosphoesterase	Metallophos
FPSE_08459	283.917203057966	281.644827129885	296.670717446021	1114.29971877083	1313.99052036241	1445.76666885029	287.410915877957	1291.35230266117	-2.16798771368873	3.07700711312606e-53	9.325981606745e-52	-	Contig1573	42878	44286	-	1188	protein_coding	- && - && - && -	-
FPSE_11510	2580.60457779472	2532.88095388139	2156.87629710756	694.601142962607	603.803083755154	666.969706348061	2423.45394292789	655.124644355274	1.88764143434465	3.63298220869823e-53	1.09847855852024e-51	-	Contig2156	489438	492309	+	2805	protein_coding	- && sp|Q4IR87|PNG1_GIBZE Protein PNG1 OS=Gibberella zeae (strain ATCC MYA-4620 / CBS 123657 / FGSC 9075 / NRRL 31084 / PH-1) OX=229533 GN=PNG1 PE=3 SV=1 && - && PF01841:Transglutaminase-like superfamily	Transglut_core
FPSE_02079	1770.4265590686	1488.00748258383	1472.32866191961	263.360856319659	161.014155668041	221.657597019864	1576.92090119068	215.344203002522	2.87410026358573	3.84648739745416e-53	1.16026544853206e-51	-	Contig1195	78268	79145	+	726	protein_coding	- && - && - && PF13417:Glutathione S-transferase, N-terminal domain	-
FPSE_09659	8036.88482656227	6364.40409702036	5842.20814862452	1537.14603389761	1380.12133429749	1334.93787034035	6747.83235740239	1417.40174617849	2.25126850485402	3.94097602591308e-53	1.1859435931661e-51	-	Contig1595	134345	136357	-	2013	protein_coding	- && sp|Q54DY9|BCS1B_DICDI Probable mitochondrial chaperone BCS1-B OS=Dictyostelium discoideum OX=44689 GN=bcsl1b PE=3 SV=1 && - && PF00004:ATPase family associated with various cellular activities (AAA)|PF08740:BCS1 N terminal	AAA
FPSE_07261	5139.9153653601	4125.66415713811	3780.54711556213	942.223302689458	760.025151456884	771.807758992591	4348.70887935345	824.685404379645	2.39897737666508	4.43160988844974e-53	1.33042809660592e-51	-	Contig1364	349648	352377	+	2514	protein_coding	- && - && - && PF13854:Kelch motif	-
FPSE_06627	707.765027623072	788.221017906162	658.488720817689	122.761833423905	109.259605631885	145.774816058109	718.158255448974	125.932085037966	2.51252430314117	6.71331541328794e-53	2.01066177236276e-51	-	Contig1356	122230	122976	-	747	protein_coding	- && sp|G4N292|RED3_MAGO7 Short-chain dehydrogenase RED3 OS=Magnaporthe oryzae (strain 70-15 / ATCC MYA-4617 / FGSC 8958) OX=242507 GN=RED3 PE=2 SV=1 && - && PF00106:short chain dehydrogenase	adh_short
FPSE_07409	4303.37360635002	4701.44999826712	3433.76310125023	752.309697136238	521.379170734609	555.142450193895	4146.19556862246	609.610439354914	2.76642846173116	8.08704594767754e-53	2.41638644130016e-51	-	Contig1366	43467	43931	-	414	protein_coding	- && - && - && -	-
FPSE_04950	1325.28494427415	920.872847748906	645.459263632559	55.6100612945894	54.6298028159425	43.9321363462794	963.872351885204	51.3906668189371	4.22942168047732	8.70763784303794e-53	2.59569561961053e-51	-	Contig1241	161409	161977	-	519	protein_coding	- && sp|A4DA06|XAND_ASPFU Xanthocillin biosynthesis cluster protein D OS=Neosartorya fumigata (strain ATCC MYA-4609 / Af293 / CBS 101355 / FGSC A1100) OX=330879 GN=xanD PE=3 SV=1 && - && PF13664:Domain of unknown function (DUF4149)	-
FPSE_00442	1003.85011081209	1218.85884232319	1791.04922998662	11316.1228502292	10799.4494408779	10563.6818759917	1337.91939437397	10893.0847223663	-3.02535503383257	8.82685315206688e-53	2.62505639867454e-51	-	Contig0338	94929	96831	+	1845	protein_coding	- && sp|B0Y9Q9|BTGE_ASPFC Probable beta-glucosidase btgE OS=Neosartorya fumigata (strain CEA10 / CBS 144.89 / FGSC A1163) OX=451804 GN=btgE PE=3 SV=2 && - && -	-
FPSE_03118	127.762741376085	157.644203581232	175.396539030587	804.772019112266	824.239130205448	958.519338464279	153.601161329301	862.510162593998	-2.48897104006209	1.67869918552462e-52	4.98066510103312e-51	-	Contig1206	119074	121300	+	2094	protein_coding	- && sp|P20271|HM14_CAEEL Homeobox protein ceh-14 OS=Caenorhabditis elegans OX=6239 GN=ceh-14 PE=1 SV=3 && - && PF00412:LIM domain	LIM
FPSE_06418	310.28094334192	383.536812371413	362.820269308985	1324.14900667494	1348.49355371984	1495.68955106197	352.212675007439	1389.44403715225	-1.97950393063294	1.71989497507385e-52	5.09096949514265e-51	-	Contig1323	74214	77829	-	3453	protein_coding	- && - && - && -	-
FPSE_06313	714.862957699521	492.157513619457	473.069522413925	11.5417108347261	21.0851870517673	31.950644615476	560.029997910968	21.5258475006564	4.69579646875942	3.55458359878782e-52	1.04972073690077e-50	-	Contig1273	591902	592345	+	444	protein_coding	- && - && - && -	-
FPSE_01871	353.882513811536	274.916111123369	380.861056180703	8.39397151616444	14.3762638989322	8.98611879810261	336.553227038536	10.5854514043998	4.98116338171741	3.9071769739601e-52	1.15116337402559e-50	-	Contig1192	94429	96508	+	1920	protein_coding	- && sp|A0A2Z5U1Z1|HIMD_ASPJA Transcription factor himD OS=Aspergillus japonicus OX=34381 GN=himD PE=3 SV=1 && - && -	-
FPSE_00733	2005.67224160234	2281.03472620893	1942.39138652158	550.854380748291	442.788928087113	430.335244664692	2076.36611811095	474.659517833365	2.1299031468162	4.81530733461921e-52	1.41543221861464e-50	-	Contig0343	163345	165181	-	1155	protein_coding	- && - && - && -	-
FPSE_10965	161.224411736488	347.009496907469	293.663919634068	2991.4015990731	3457.01225889657	3736.22850472222	267.299276092675	3394.88078756396	-3.66616276449055	5.01695553979968e-52	1.47129189198431e-50	-	Contig1664	8902	10812	-	960	protein_coding	- && sp|Q4HVS2|GNT1_GIBZE Glucose N-acetyltransferase 1 OS=Gibberella zeae (strain ATCC MYA-4620 / CBS 123657 / FGSC 9075 / NRRL 31084 / PH-1) OX=229533 GN=GNT1 PE=3 SV=2 && - && -	-
FPSE_03288	142.972591539904	185.520312751084	190.430528090351	915.992141701445	806.98761352673	906.59954096413	172.974477460447	876.526432064102	-2.34032042972242	5.14864140540069e-52	1.50642350958479e-50	-	Contig1209	63666	64850	+	1134	protein_coding	- && sp|D3ZRC4|PLPL8_RAT Calcium-independent phospholipase A2-gamma OS=Rattus norvegicus OX=10116 GN=Pnpla8 PE=3 SV=1 && - && PF01734:Patatin-like phospholipase	-
FPSE_05083	344.756603713244	282.606072273673	300.679781195292	27.2804074275344	22.0436046450294	24.9614411058406	309.347485727403	24.7618177261348	3.64579192927717	6.13265168546196e-52	1.79019733186907e-50	-	Contig1244	96730	97665	+	936	protein_coding	- && sp|B8NU00|LNAB_ASPFN NmrA-like family domain-containing oxidoreductase lnaB OS=Aspergillus flavus (strain ATCC 200026 / FGSC A1120 / NRRL 3357 / JCM 12722 / SRRC 167) OX=332952 GN=lnaB PE=2 SV=1 && - && PF05368:NmrA-like family	NmrA
FPSE_01779	5855.79231307054	4741.82229430622	4556.30095104599	1203.48566613008	993.879044212849	938.550185579606	5051.30518614091	1045.30496530751	2.27297340365392	6.25545728243404e-52	1.82184800715303e-50	-	Contig1191	25162	26445	-	1137	protein_coding	- && sp|Q9P7V8|MPCP_SCHPO Probable mitochondrial phosphate carrier protein OS=Schizosaccharomyces pombe (strain 972 / ATCC 24843) OX=284812 GN=SPBC1703.13c PE=3 SV=1 && - && PF00153:Mitochondrial carrier protein	Mito_carr
novel.472	1268.50150366255	1834.05573434751	950.148108577121	84.988961601165	64.213978748564	101.84267971183	1350.90178219573	83.6818733538529	4.01402982407766	6.45895080052065e-52	1.87679925898615e-50	-	Contig1370	56744	57220	+	384	-	- && - && -	-
FPSE_12152	83.1471808955471	88.4345532284962	89.2016684212698	481.604115739935	588.46840226296	492.239618607176	86.9278008484377	520.770712203357	-2.5830108156187	7.19835292297595e-52	2.08686345952362e-50	-	Contig2174	11185	13033	-	1635	protein_coding	- && - && - && -	-
FPSE_09626	774.688368343878	636.344285187658	513.160159906631	46.1668433389044	41.2119565102724	66.8966621636528	641.397604479389	51.4251540042765	3.64116070570298	1.11300820996778e-51	3.2193381306123e-50	-	Contig1595	33847	36108	+	2208	protein_coding	- && - && - && -	-
FPSE_05333	364.022413920749	380.653076940049	285.645792135527	17.8371894718494	9.58417593262149	19.9691528846725	343.440427665442	15.7968394297145	4.44999065693556	1.15459003222384e-51	3.33200481053391e-50	-	Contig1247	397255	398112	+	807	protein_coding	- && - && - && PF00043:Glutathione S-transferase, C-terminal domain	GST_C
FPSE_03768	717.904927732285	968.935104938306	993.24554388178	3916.83695873023	4039.73015559996	4281.38637847378	893.36185885079	4079.31783093466	-2.19082550759155	1.78435724208887e-51	5.13773225000544e-50	-	Contig1218	56407	57818	+	1305	protein_coding	- && - && - && -	-
FPSE_10616	559.722486028561	450.823972436573	374.847460556797	44.0683504598633	42.1703741035346	39.9383057693449	461.79797300731	42.0590101109143	3.45717236138277	4.49884024729272e-51	1.29242192954539e-49	-	Contig1637	3586	4470	+	885	protein_coding	- && sp|A0A140JWS5|PTMH_PENSI Short-chain dehydrogenase ptmH OS=Penicillium simplicissimum OX=69488 GN=ptmH PE=3 SV=1 && - && PF00106:short chain dehydrogenase	adh_short
FPSE_03682	1187.38230278885	656.530433207206	725.64053861797	57.7085541736305	35.4614509506995	46.9275092789803	856.517758204675	46.6991714677701	4.20019884259854	4.62325961276162e-51	1.32516009126871e-49	-	Contig1216	283534	284205	+	672	protein_coding	- && sp|Q03629|YMH9_YEAST Uncharacterized protein YML079W OS=Saccharomyces cerevisiae (strain ATCC 204508 / S288c) OX=559292 GN=YML079W PE=1 SV=1 && - && PF06172:Cupin superfamily (DUF985)	-
FPSE_08203	79.0912208518619	76.8996115030402	68.1540837375994	415.50159005014	494.543478123269	456.295143414766	74.7149720308338	455.446737196058	-2.60820142498708	4.74354664359382e-51	1.35656867782596e-49	-	Contig1566	29735	31674	+	1767	protein_coding	- && sp|P38675|MET7_NEUCR Cystathionine gamma-synthase OS=Neurospora crassa (strain ATCC 24698 / 74-OR23-1A / CBS 708.71 / DSM 1257 / FGSC 987) OX=367110 GN=met-7 PE=3 SV=3 && - && PF01053:Cys/Met metabolism PLP-dependent enzyme	Cys_Met_Meta_PP
FPSE_03305	1113.36103199159	1061.21463874195	800.810483916793	174.174908960412	157.180485294992	169.737799519716	991.795384883447	167.031064591707	2.57051669717736	5.91452333575484e-51	1.68763730046572e-49	-	Contig1209	105213	107258	+	1908	protein_coding	- && - && - && PF05729:NACHT domain	NACHT
FPSE_06119	647.939616978715	654.60794291963	791.790090480935	2331.42558861467	2558.01655641668	2489.15490707442	698.112550126426	2459.53235070192	-1.81704222846519	7.13303288753179e-51	2.03075041914922e-49	-	Contig1273	711	3887	-	3045	protein_coding	- && sp|Q2UPC0|ACLQ_ASPOR ABC transporter aclQ OS=Aspergillus oryzae (strain ATCC 42149 / RIB 40) OX=510516 GN=aclQ PE=3 SV=1 && - && PF00005:ABC transporter|PF00664:ABC transporter transmembrane region	ABC_tran
FPSE_04428	4350.0171468524	6020.27833554426	5754.00874614056	22783.3371877493	24176.0837900377	26227.4853987288	5374.76807617908	24395.6354588386	-2.18231088200136	8.87043826601852e-51	2.51511818092617e-49	FEM1	Contig1227	70892	71578	-	630	protein_coding	- && - && - && PF10342:Ser-Thr-rich glycosyl-phosphatidyl-inositol-anchored membrane family	-
FPSE_05313	3980.92478287705	3485.4748913753	3116.04479912054	794.27955471706	568.341632804455	666.969706348061	3527.48149112429	676.530297956525	2.38297224110828	8.87408498598151e-51	2.51511818092617e-49	-	Contig1247	350311	354397	+	3456	protein_coding	- && sp|A0A1D8PK89|GAP2_CANAL General amino-acid permease GAP2 OS=Candida albicans (strain SC5314 / ATCC MYA-2876) OX=237561 GN=GAP2 PE=2 SV=1 && - && PF00067:Cytochrome P450|PF00324:Amino acid permease	AA_permease
FPSE_00288	244.371592632035	247.040001953517	195.44185777694	1261.19422030371	1012.08897848483	1118.27256154166	228.951150787497	1130.51858677673	-2.30331627453807	9.14300443761547e-51	2.58555185759264e-49	-	Contig0335	208912	209685	-	714	protein_coding	- && - && - && -	-
FPSE_09602	894.339189632592	720.933857841002	659.490986755006	49.3145826574661	64.213978748564	91.8581032694934	758.2546780762	68.4622215585078	3.46744123311374	9.53267738512837e-51	2.68974364793299e-49	-	Contig1594	48876	55568	-	6576	protein_coding	- && sp|Q00808|HETE1_PODAS Vegetative incompatibility protein HET-E-1 OS=Podospora anserina OX=2587412 GN=HET-E1 PE=4 SV=1 && - && PF12796:Ankyrin repeats (3 copies)|PF05729:NACHT domain|PF17111:Fungal N-terminal domain of STAND proteins	NACHT
FPSE_10359	619.547896672918	806.484675638134	854.932844531946	34.6251325041783	21.0851870517673	57.9105433655502	760.321805614333	37.8736209738319	4.3298100591718	1.15327366695119e-50	3.24684979702326e-49	-	Contig1623	173	2564	-	2313	protein_coding	- && - && - && -	-
FPSE_12408	69.9653107535701	151.876732718504	146.330826848375	1463.69878313117	1658.06243634352	1881.09420173615	122.724290106817	1667.61847373695	-3.76316313322922	1.17564526460945e-50	3.30249442513017e-49	-	Contig2190	24133	27398	+	2418	protein_coding	- && - && - && -	-
FPSE_00948	202.798002184261	230.698834509121	295.668451508703	1261.19422030371	1293.8637509039	1476.71885582153	243.055096067362	1343.92560900971	-2.46714575490071	1.32339086031976e-50	3.70930062154669e-49	-	Contig0348	18978	20333	+	1356	protein_coding	- && - && - && -	-
FPSE_01381	3295.46753549425	3984.36112100127	4084.23369456938	11985.5420786433	12896.4671349355	12441.7807047952	3788.0207836883	12441.2633061247	-1.71558216483651	1.4025256170318e-50	3.92242760312934e-49	-	Contig0364	47657	48868	+	1110	protein_coding	- && sp|Q5UP73|YR614_MIMIV Putative band 7 family protein R614 OS=Acanthamoeba polyphaga mimivirus OX=212035 GN=MIMI_R614 PE=3 SV=1 && - && PF01145:SPFH domain / Band 7 family	-
FPSE_07172	627.659816760289	360.466928920501	606.370892077171	27.2804074275344	20.1267694585051	13.9784070192707	531.499212585987	20.4618613017701	4.70303550023149	2.502230511094e-50	6.98254589098015e-49	-	Contig1364	80810	82764	+	1848	protein_coding	- && sp|A0A2V5GRP3|PYVG_ASPV1 MFS-type transporter pyvG OS=Aspergillus violaceofuscus (strain CBS 115571) OX=1450538 GN=pyvG PE=3 SV=1 && - && PF07690:Major Facilitator Superfamily	MFS_1
FPSE_10986	171.364311845701	225.892608790181	231.523431520375	987.340899588842	1201.85566195074	1101.29878158969	209.593450718752	1096.83178104309	-2.3873132586242	3.20743682062616e-50	8.9307729847281e-49	-	Contig1665	9308	10854	-	1401	protein_coding	- && sp|P11551|FUCP_ECOLI L-fucose-proton symporter OS=Escherichia coli (strain K12) OX=83333 GN=fucP PE=1 SV=3 && - && PF07690:Major Facilitator Superfamily	MFS_1
FPSE_02736	2929.41714155165	3972.82617927581	4101.27221550378	16660.9842131469	19389.7463292865	20867.7647644827	3667.83851211042	18972.8317689721	-2.37090174058067	3.27195605126691e-50	9.0904410555922e-49	-	Contig1202	242865	244079	+	1053	protein_coding	- && sp|B0YDH7|MTFA_ASPFC C2H2 finger domain transcription factor mtfA OS=Neosartorya fumigata (strain CEA10 / CBS 144.89 / FGSC A1163) OX=451804 GN=mtfA PE=4 SV=1 && - && -	-
FPSE_09620	1442.90778554102	1402.4566647867	1451.28107723594	3307.22477736879	3512.60047930578	3501.59095832732	1432.21517585455	3440.4720716673	-1.26449546930994	3.39028727974305e-50	9.39858852233362e-49	-	Contig1595	17751	18509	-	594	protein_coding	- && - && - && -	-
FPSE_05159	542.484655842899	514.266151926581	586.325573330819	1569.67267352275	1663.81294190309	1647.45511298548	547.692127033433	1626.98024280377	-1.57111205170631	3.5169678164178e-50	9.72848586598191e-49	-	Contig1245	121020	123227	-	2208	protein_coding	- && sp|P21657|DAL81_YEAST Transcriptional activator protein DAL81 OS=Saccharomyces cerevisiae (strain ATCC 204508 / S288c) OX=559292 GN=DAL81 PE=1 SV=3 && - && PF04082:Fungal specific transcription factor domain	Fungal_trans
FPSE_08609	5437.01443856004	5305.11194856598	5666.81160959393	12565.7753596982	11979.2614981836	12194.1632090252	5469.64599890665	12246.4000223023	-1.162841557672	5.01408563261487e-50	1.38395317820474e-48	-	Contig1576	724	2610	-	1887	protein_coding	- && sp|O14328|KSP1_SCHPO Serine/threonine-protein kinase ksp1 OS=Schizosaccharomyces pombe (strain 972 / ATCC 24843) OX=284812 GN=ksp1 PE=1 SV=1 && - && PF00069:Protein kinase domain	Pkinase
FPSE_02463	819.303928824415	694.980238958726	581.31424364423	92.3336866778089	60.3803083755154	83.8704421156244	698.532803809124	78.8614790563162	3.14978852997279	5.0851146796157e-50	1.40050691034894e-48	-	Contig1198	194528	196213	+	1686	protein_coding	- && sp|Q00808|HETE1_PODAS Vegetative incompatibility protein HET-E-1 OS=Podospora anserina OX=2587412 GN=HET-E1 PE=4 SV=1 && - && PF06985:Heterokaryon incompatibility protein (HET)	-
FPSE_12172	3800.43456093306	3356.6680421077	3082.97002318906	983.14391383076	808.904448713254	887.628845723691	3413.35754207661	893.225736089235	1.93444982644604	5.88522970777663e-50	1.61735304051675e-48	-	Contig2174	58026	59318	-	1179	protein_coding	- && sp|M2SNN6|LAEA_COCH5 Secondary metabolism regulator LAE1 OS=Cochliobolus heterostrophus (strain C5 / ATCC 48332 / race O) OX=701091 GN=LAE1 PE=3 SV=1 && - && PF13489:Methyltransferase domain	-
FPSE_00597	304.197003276392	332.590819750649	286.648058072845	6.29547863712333	10.5425935258836	2.99537293270087	307.811960366628	6.61114836523595	5.52997278471974	6.99668858258359e-50	1.9186373950812e-48	-	Contig0340	209507	209926	+	420	protein_coding	- && sp|A0A2I1BT15|NVFD_ASPN1 Alpha/beta hydrolase nvfD OS=Aspergillus novofumigatus (strain IBT 16806) OX=1392255 GN=nvfD PE=1 SV=1 && - && PF12697:Alpha/beta hydrolase family	-
FPSE_08056	214.965882315317	339.319535757165	336.761354938727	2039.73507842796	1851.66279018247	1851.14047240914	297.015591003736	1914.17944700652	-2.68747560053748	7.26191030222005e-50	1.98706569371114e-48	-	Contig1564	97021	97663	+	579	protein_coding	- && - && - && PF12973:ChrR Cupin-like domain	-
FPSE_02224	2505.56931698655	2269.49978448347	1262.85508102022	160.534705246645	164.84782604109	173.73163009665	2012.64139416342	166.371387128128	3.59653480323727	8.27929026028498e-50	2.26056742042135e-48	-	Contig1195	424039	425658	-	1620	protein_coding	- && sp|O42275|ACES_ELEEL Acetylcholinesterase OS=Electrophorus electricus OX=8005 GN=ache PE=3 SV=1 && - && PF00135:Carboxylesterase family	COesterase
FPSE_04097	1190.42427282161	1242.88997091789	1187.6851357214	3133.04986840838	3248.07722356542	2945.45005048919	1206.99979315363	3108.85904748766	-1.36491010739432	8.3296512836687e-50	2.26942692715696e-48	-	Contig1221	58951	60932	+	1920	protein_coding	- && sp|O60056|YG55_SCHPO Uncharacterized transcriptional regulatory protein C56F2.05c OS=Schizosaccharomyces pombe (strain 972 / ATCC 24843) OX=284812 GN=SPBC56F2.05c PE=3 SV=1 && - && -	-
FPSE_11447	882.171309501536	830.515804232834	836.892057660228	190.962851992741	152.388397328682	207.679190000594	849.8597237982	183.676813107339	2.21128202406283	1.12057903292526e-49	3.0464840704142e-48	-	Contig2156	327559	329454	-	1803	protein_coding	- && - && - && PF12937:F-box-like	-
FPSE_02958	5588.09895018732	5349.32922518023	4703.63404383168	1760.63552551549	1751.02894288995	1834.16669245717	5213.68740639974	1781.94372028753	1.54885800974926	1.15277206098266e-49	3.12729534059729e-48	-	Contig1205	92426	94329	+	1728	protein_coding	- && sp|O43301|HS12A_HUMAN Heat shock 70 kDa protein 12A OS=Homo sapiens OX=9606 GN=HSPA12A PE=1 SV=2 && - && PF00012:Hsp70 protein	HSP70
FPSE_01903	483.673235209463	378.730586652473	395.895045240467	15.7386965928083	37.3782861372238	24.9614411058406	419.432955700801	26.0261412786242	4.00048039474948	1.17081029293895e-49	3.16944350453922e-48	-	Contig1192	169507	170913	+	1407	protein_coding	- && - && - && PF09346:SMI1 / KNR4 family (SUKH-1)	-
FPSE_05296	2424.45011611284	2100.32063917679	2131.81964867462	669.419228414114	591.343655042746	690.932689809667	2218.86346798808	650.565191088843	1.77033232950311	1.2680483638645e-49	3.42535281914699e-48	-	Contig1247	289201	291355	+	2109	protein_coding	- && sp|Q2H2B2|IML2_CHAGB Inclusion body clearance protein IML2 OS=Chaetomium globosum (strain ATCC 6205 / CBS 148.51 / DSM 1962 / NBRC 6347 / NRRL 1970) OX=306901 GN=IML2 PE=3 SV=1 && - && PF10300:Protein of unknown function (DUF3808)	-
FPSE_02625	27069.4773315552	32162.3012660028	35742.8078566216	113951.311071251	109169.514378118	113889.071189508	31658.1954847265	112336.632212959	-1.8271736385076	1.4434585113711e-49	3.89088848522563e-48	-	Contig1201	53564	54532	-	969	protein_coding	- && - && - && -	-
FPSE_10229	313.322913374684	370.079380358381	413.935832112185	1514.06261222816	1856.45487814878	1640.46590947584	365.77937528175	1670.32779995093	-2.19109729369147	1.92846087126546e-49	5.18719124799621e-48	-	Contig1616	18978	20732	-	1695	protein_coding	- && sp|P38090|AGP2_YEAST General amino acid permease AGP2 OS=Saccharomyces cerevisiae (strain ATCC 204508 / S288c) OX=559292 GN=AGP2 PE=1 SV=1 && - && PF00324:Amino acid permease	AA_permease
FPSE_05373	711.820987666757	685.367787520846	462.044597103431	26.2311609880139	45.045626883321	49.9228822116812	619.744457430345	40.399890027672	3.93510553303094	2.21280919009164e-49	5.93942365026929e-48	-	Contig1247	485132	486307	-	1176	protein_coding	- && sp|P41890|SCN1_SCHPO Cut9-interacting protein scn1 OS=Schizosaccharomyces pombe (strain 972 / ATCC 24843) OX=284812 GN=scn1 PE=3 SV=2 && - && PF01026:TatD related DNase	-
FPSE_07032	1451.01970562839	852.624442539958	1102.4925310494	81.8412222826033	115.96852878472	69.8920350963536	1135.37889307258	89.2339287212257	3.66752727356032	2.59616265595865e-49	6.95365426814802e-48	-	Contig1362	35359	37191	+	1767	protein_coding	- && sp|B2KWH5|MFS1_AJECA MFS siderochrome iron transporter 1 OS=Ajellomyces capsulatus OX=5037 GN=MFS1 PE=2 SV=1 && - && -	-
FPSE_00521	4293.23370624081	4614.9379353262	4118.31073643818	1684.04053543049	1520.05030291377	1585.55073904299	4342.1607926684	1596.54719246242	1.44370176781207	3.34010135147259e-49	8.92737215649922e-48	-	Contig0340	24069	24496	-	321	protein_coding	- && sp|P55143|GLRX_RICCO Glutaredoxin OS=Ricinus communis OX=3988 PE=3 SV=1 && - && PF00462:Glutaredoxin	-
FPSE_09541	553.638545963033	619.041872599474	826.869398287052	3457.26701822023	4362.7168845293	3861.03571025142	666.51660561652	3893.67320433365	-2.54651214206255	3.44467034935514e-49	9.18747971704847e-48	-	Contig1593	241044	241949	+	906	protein_coding	- && - && - && -	-
FPSE_10564	430.945754641555	435.444050135965	394.89277930315	2.09849287904111	6.70892315283505	1.99691528846725	420.42752802689	3.6014437734478	6.8419782244452	3.67505659119902e-49	9.78136385586142e-48	-	Contig1632	11712	12962	+	1194	protein_coding	- && sp|P77316|YBDR_ECOLI Uncharacterized zinc-type alcohol dehydrogenase-like protein YbdR OS=Escherichia coli (strain K12) OX=83333 GN=ybdR PE=3 SV=1 && - && PF00107:Zinc-binding dehydrogenase|PF08240:Alcohol dehydrogenase GroES-like domain	ADH_N
FPSE_03940	532.344755733686	483.506307325365	435.985682733173	79.7427294035622	79.5486602407584	60.905916298251	483.945581930741	73.3991019808572	2.7211358581845	4.06835632455643e-49	1.08054520494351e-47	-	Contig1220	54272	55077	-	570	protein_coding	- && - && - && -	-
FPSE_06373	462.379444980116	374.885606077321	359.813471497032	48.2653362179455	47.9208796631075	36.9429328366441	399.026174184823	44.376382905899	3.16866267022901	4.10574301269392e-49	1.08819368677446e-47	-	Contig1312	45396	46613	+	1218	protein_coding	- && sp|Q7M9S1|TRPB1_WOLSU Tryptophan synthase beta chain 1 OS=Wolinella succinogenes (strain ATCC 29543 / DSM 1740 / LMG 7466 / NCTC 11488 / FDC 602W) OX=273121 GN=trpB1 PE=3 SV=1 && - && PF00291:Pyridoxal-phosphate dependent enzyme	PALP
FPSE_01640	7487.30224064293	7616.90651937613	8134.39034726996	19056.4138345723	19864.1630379513	21651.5540152061	7746.19970242967	20190.7102959099	-1.38214228110874	4.43640963034392e-49	1.17337940724065e-47	-	Contig1190	427173	428907	+	1344	protein_coding	- && sp|P53373|TBB_BOTFU Tubulin beta chain OS=Botryotinia fuckeliana OX=40559 GN=tubA PE=3 SV=1 && - && PF03953:Tubulin C-terminal domain|PF00091:Tubulin/FtsZ family, GTPase domain	Tubulin
FPSE_08858	1849.51777992046	1842.7069406416	1933.37099308573	4424.67223545818	4669.41051437319	4903.42549083133	1875.19857121593	4665.8360802209	-1.31516497397315	5.54824224869803e-49	1.46438918851574e-47	-	Contig1580	129161	131335	-	1941	protein_coding	- && sp|Q9UT46|MOC3_SCHPO Transcriptional regulatory protein moc3 OS=Schizosaccharomyces pombe (strain 972 / ATCC 24843) OX=284812 GN=moc3 PE=1 SV=4 && - && PF00172:Fungal Zn(2)-Cys(6) binuclear cluster domain|PF11951:Fungal specific transcription factor domain	Zn_clus
FPSE_00944	1044.40971124895	659.41416863857	805.821813603382	77.6442365245211	93.9249241396906	58.9090010097838	836.548564496966	76.8260538913318	3.4434146135857	6.54173245116953e-49	1.72301888615108e-47	-	Contig0348	8433	10661	+	1914	protein_coding	- && - && - && PF06772:Bacterial low temperature requirement A protein (LtrA)	-
FPSE_04594	2263.22570437636	2074.36702029451	2162.88989273146	5397.32368489374	5061.40331001741	5327.76998963061	2166.82753913411	5262.16566151392	-1.2801139366103	6.63007115543834e-49	1.74266330846988e-47	-	Contig1233	25276	27701	+	2313	protein_coding	- && sp|Q59X23|PMT4_CANAL Dolichyl-phosphate-mannose--protein mannosyltransferase 4 OS=Candida albicans (strain SC5314 / ATCC MYA-2876) OX=237561 GN=PMT4 PE=2 SV=2 && - && PF02366:Dolichyl-phosphate-mannose-protein mannosyltransferase|PF16192:C-terminal four TMM region of protein-O-mannosyltransferase|PF02815:MIR domain	-
FPSE_10264	674.303357262669	699.786464677666	521.178287405172	91.2844402382883	85.2991658003313	62.9028315867183	631.756036448502	79.8288125417793	2.98524787021215	9.74221663899842e-49	2.55536527121058e-47	-	Contig1618	53506	54551	+	885	protein_coding	- && - && - && PF12697:Alpha/beta hydrolase family	-
FPSE_08713	661.121487120692	859.353158546474	826.869398287052	8615.36251490328	4886.01289045044	6265.32171756599	782.448014651406	6588.89904097323	-3.07379832000123	1.19841536009423e-48	3.13692648699047e-47	-	Contig1576	311807	312826	-	1020	protein_coding	- && sp|Q12436|ZRT2_YEAST Zinc-regulated transporter 2 OS=Saccharomyces cerevisiae (strain ATCC 204508 / S288c) OX=559292 GN=ZRT2 PE=1 SV=1 && - && PF02535:ZIP Zinc transporter	-
FPSE_01857	1702.48922833687	1293.83596353865	1047.36790449693	114.367861907741	165.806243634352	155.759392500445	1347.89769879082	145.311166014179	3.21200023873932	1.29410539010358e-48	3.38041673963346e-47	-	Contig1192	53521	54516	+	996	protein_coding	- && - && - && -	-
FPSE_10493	1223.88594318202	1174.64156570894	969.191161386157	264.41010275918	239.604398315537	213.669935865995	1122.57289009237	239.228145646904	2.23094678419354	1.35076932621848e-48	3.52117213865473e-47	-	Contig1629	50785	52636	+	1803	protein_coding	- && - && - && -	-
FPSE_11895	25966.2561996728	17461.0180369091	17040.5254662745	2901.16640527433	1862.20538370836	2345.37700630478	20155.9332342855	2369.58293176249	3.08861808901771	1.50065646063026e-48	3.90386379871145e-47	-	Contig2163	530652	534806	-	4044	protein_coding	- && sp|Q9Y8G1|ATRD_EMEND ABC multidrug transporter atrD OS=Emericella nidulans OX=162425 GN=atrD PE=1 SV=1 && - && PF00664:ABC transporter transmembrane region|PF00005:ABC transporter	ABC_membrane
FPSE_04316	2379.83455563231	2140.69293521588	2049.63384181457	484.751855058496	611.470424501251	468.276635145569	2190.05377755425	521.499638235106	2.06955983468066	2.49255280729994e-48	6.47093268763995e-47	-	Contig1224	149711	151425	-	1608	protein_coding	- && sp|P29251|FOL1_PNECA Folic acid synthesis protein fol1 OS=Pneumocystis carinii OX=4754 GN=fol1 PE=1 SV=1 && - && PF00809:Pterin binding enzyme|PF01288:7,8-dihydro-6-hydroxymethylpterin-pyrophosphokinase (HPPK)	-
FPSE_06717	329.546753549425	560.405918828405	451.019671792937	6.29547863712333	8.62575833935934	18.9706952404388	446.990781390256	11.2973107389738	5.30275591595831	2.57952480749134e-48	6.68302654112635e-47	-	Contig1357	129548	129741	+	144	protein_coding	- && - && - && -	-
FPSE_06178	556.680515995797	530.607319370977	478.080852100514	98.6291653149322	114.051693598196	100.844222067596	521.789562489096	104.508360326908	2.31847998389557	2.78703905008397e-48	7.20591790316609e-47	-	Contig1273	207736	210001	+	2154	protein_coding	- && sp|A0A1J0HSL8|IACK_PESFW C6 finger domain transcription factor iacK OS=Pestalotiopsis fici (strain W106-1 / CGMCC3.15140) OX=1229662 GN=iacK PE=1 SV=1 && - && PF04082:Fungal specific transcription factor domain|PF00172:Fungal Zn(2)-Cys(6) binuclear cluster domain	Zn_clus
FPSE_02410	526.260815668158	442.172766142481	426.965289297314	2016.65165675851	1671.48028264919	1827.17748894753	465.132957035984	1838.43647611841	-1.98284684497067	2.98379181146059e-48	7.69891210985626e-47	-	Contig1198	47171	48922	-	1752	protein_coding	- && - && - && PF12831:FAD dependent oxidoreductase	-
FPSE_07638	1749.13276883925	1959.01760303995	2149.86043554633	6348.99020553888	7490.0334913437	6533.90682386483	1952.67026914185	6790.97684024914	-1.79818969491476	3.44005632888795e-48	8.85814504688647e-47	-	Contig1403	18102	20429	+	2328	protein_coding	- && - && - && -	-
FPSE_05494	2043.18987200643	1471.66631513943	1459.29920473448	294.838249505276	275.065849266237	316.511073222059	1658.05179729345	295.471723997857	2.48848297496643	3.49975723343424e-48	8.99359521103009e-47	-	Contig1251	59505	61382	+	1878	protein_coding	- && - && - && PF01253:Translation initiation factor SUI1|PF17832:Pre-PUA-like domain	SUI1
FPSE_05885	3904.87553205795	3233.62866370284	2692.08630763518	708.241346676375	694.852755115058	652.99129932879	3276.86350113199	685.361800373408	2.25739771285411	4.07039452804985e-48	1.04258402636917e-46	-	Contig1264	145967	149060	+	2976	protein_coding	- && - && - && -	-
FPSE_08406	421.819844543263	397.955489528233	358.811205559715	40.9206111413016	17.2515166787187	25.9598987500742	392.86217987707	28.0440088566982	3.81834392089527	4.07355823705689e-48	1.04258402636917e-46	-	Contig1571	14504	15463	+	915	protein_coding	- && - && - && PF00106:short chain dehydrogenase	adh_short
FPSE_10190	2727.63312937831	2358.89558285576	2399.42465393843	818.412222826033	787.819261661487	864.664319906318	2495.31778872417	823.631934797946	1.59916608282689	4.2389271725864e-48	1.08272113607857e-46	-	Contig1614	94476	96365	+	1638	protein_coding	- && sp|Q5AD78|DCW1_CANAL Mannan endo-1,6-alpha-mannosidase DCW1 OS=Candida albicans (strain SC5314 / ATCC MYA-2876) OX=237561 GN=DCW1 PE=1 SV=1 && - && PF03663:Glycosyl hydrolase family 76	-
FPSE_00537	20830.3967943564	13969.775674671	13415.3295709966	2576.94925546248	1885.20740594665	2009.89523784228	16071.8340133413	2157.3506330838	2.89730822576817	4.25838165676168e-48	1.08550175471859e-46	-	Contig0340	58874	60481	-	1515	protein_coding	- && sp|A0A2I6PJ00|NODJ_HYPPI Cytochrome P450 monooxygenase nodJ OS=Hypoxylon pulicicidum OX=1243767 GN=nodJ PE=3 SV=1 && - && PF00067:Cytochrome P450	p450
FPSE_06885	430.945754641555	349.893232338833	377.85425836875	46.1668433389044	58.4634731889911	46.9275092789803	386.231081783046	50.5192752689586	2.93154948558559	4.77850891572683e-48	1.21564115368159e-46	-	Contig1360	31885	34023	+	2139	protein_coding	- && - && - && PF04082:Fungal specific transcription factor domain|PF00172:Fungal Zn(2)-Cys(6) binuclear cluster domain	Fungal_trans
FPSE_09187	304.197003276392	589.243273142045	402.910906801691	9.443217955685	7.66734074609719	8.98611879810261	432.117061073376	8.6988924999616	5.63791200232955	5.47573801752391e-48	1.39022294476975e-46	PKS6	Contig1588	254495	262414	+	7695	protein_coding	- && sp|K3VA96|W4931_FUSPC Highly reducing polyketide synthase 40 OS=Fusarium pseudograminearum (strain CS3096) OX=1028729 GN=PKS40 PE=3 SV=1 && - && PF08242:Methyltransferase domain|PF00109:Beta-ketoacyl synthase, N-terminal domain|PF13602:Zinc-binding dehydrogenase|PF14765:Polyketide synthase dehydratase|PF02801:Beta-ketoacyl synthase, C-terminal domain|PF16197:Ketoacyl-synthetase C-terminal ex…	ketoacyl-synt
FPSE_11540	396.470094270231	334.513310038225	358.811205559715	44.0683504598633	47.9208796631075	30.9521869712423	363.264869956057	40.9804723647377	3.14691557669153	5.92796603830366e-48	1.50202803478538e-46	-	Contig2157	71609	74644	+	2748	protein_coding	- && sp|O43196|MSH5_HUMAN MutS protein homolog 5 OS=Homo sapiens OX=9606 GN=MSH5 PE=1 SV=1 && - && PF00488:MutS domain V|PF05192:MutS domain III	-
FPSE_02249	4144.17717463538	3239.39613456557	3774.53351993823	1038.75397512535	870.243174682032	973.496203127783	3719.36894304639	960.831117645055	1.95293027419728	6.20359330838601e-48	1.56872901444995e-46	-	Contig1195	473759	474930	+	1113	protein_coding	- && - && - && -	-
FPSE_05537	13.181870141977	23.0698834509121	26.0589143702586	272.804074275344	286.566860385383	315.512615577825	20.7702226543826	291.627850079517	-3.8088551205953	6.34044787768789e-48	1.6001421147894e-46	-	Contig1252	91503	96791	+	4866	protein_coding	- && sp|D4B0V1|E13B_ARTBC Probable glucan endo-1,3-beta-glucosidase ARB_02077 OS=Arthroderma benhamiae (strain ATCC MYA-4681 / CBS 112371) OX=663331 GN=ARB_02077 PE=1 SV=1 && - && PF01822:WSC domain|PF12708:Pectate lyase superfamily protein	-
FPSE_02575	15226.0740039943	10269.943116231	10294.2734421895	2229.64868398118	1935.04512079628	2085.77801880404	11930.0968541383	2083.4906078605	2.51758197577015	7.74345808289298e-48	1.95033539666344e-46	-	Contig1199	199226	200728	-	1503	protein_coding	- && sp|Q9C1W3|ERG1_SCHPO Probable squalene monooxygenase OS=Schizosaccharomyces pombe (strain 972 / ATCC 24843) OX=284812 GN=erg1 PE=3 SV=1 && - && PF01266:FAD dependent oxidoreductase|PF08491:Squalene epoxidase	DAO
FPSE_00419	2538.01699733603	2733.78118893308	2677.05231857541	6238.81932938922	5985.31786992212	6399.11504189329	2649.61683494817	6207.75074706821	-1.22819889761174	8.07801712495382e-48	2.03056347135e-46	-	Contig0338	23884	27602	+	3669	protein_coding	- && sp|Q01285|CHS4_NEUCR Chitin synthase 4 OS=Neurospora crassa (strain ATCC 24698 / 74-OR23-1A / CBS 708.71 / DSM 1257 / FGSC 987) OX=367110 GN=chs-4 PE=3 SV=3 && - && PF03142:Chitin synthase	-
FPSE_02048	167.308351802016	206.667705914421	184.416932466446	712.438332434457	730.314206065758	729.872537934779	186.130996727627	724.208358811664	-1.95917590344054	9.84189361000044e-48	2.46904851772466e-46	-	Contig1194	107814	111385	-	3519	protein_coding	- && sp|O14244|YELD_SCHPO Uncharacterized membrane protein C6F6.13c OS=Schizosaccharomyces pombe (strain 972 / ATCC 24843) OX=284812 GN=SPAC6F6.13c PE=3 SV=1 && - && PF05277:Protein of unknown function (DUF726)	-
FPSE_02976	2735.74504946568	2848.16936104385	3440.77896281145	9741.20394450883	10515.7578332723	9776.89725233564	3008.23112444033	10011.2863433723	-1.73467332998183	9.99374037025584e-48	2.50218768282157e-46	-	Contig1205	141346	143177	+	1551	protein_coding	- && - && - && PF01593:Flavin containing amine oxidoreductase	Amino_oxidase
FPSE_05737	195.700072107812	320.094632881405	256.580079953315	1511.96411934912	1667.64661227614	1858.12967591877	257.458261647511	1679.24680251468	-2.70456750548079	1.32031362193232e-47	3.29922155350307e-46	-	Contig1259	50627	51983	-	1086	protein_coding	- && - && - && -	-
FPSE_03287	2474.13562664799	1852.31939207948	1601.62096783359	268.607088517262	275.065849266237	336.480226106731	1976.02532885368	293.38438796341	2.75157770897472	1.34756427120709e-47	3.36068735274067e-46	-	Contig1209	59903	62902	+	2232	protein_coding	- && - && - && PF12311:Protein of unknown function (DUF3632)	-
FPSE_04288	4975.64898359085	5414.69389495782	4427.00864513201	1174.1067658235	875.993680241604	811.746064761936	4939.11717456023	953.948836942347	2.37267135694899	1.45055852231752e-47	3.61043731222802e-46	-	Contig1224	55410	56879	-	1260	protein_coding	- && sp|B8N8Q9|AFVA_ASPFN NADPH dehydrogenase afvA OS=Aspergillus flavus (strain ATCC 200026 / FGSC A1120 / NRRL 3357 / JCM 12722 / SRRC 167) OX=332952 GN=afvA PE=2 SV=1 && - && PF00724:NADH:flavin oxidoreductase / NADH oxidase family	Oxidored_FMN
FPSE_06089	645.911636956872	534.452299946129	564.275722709831	48.2653362179455	19.168351865243	17.9722375962052	581.546553204277	28.4686418931312	4.36233319921263	1.49477572196572e-47	3.71319874933015e-46	-	Contig1269	63522	64439	-	918	protein_coding	- && - && - && PF05368:NmrA-like family	NmrA
FPSE_02846	1411.47409520246	1147.72670168287	1152.60582791528	244.474420408289	288.483695571907	299.537293270087	1237.26887493354	277.498469750094	2.15572742346892	1.59339892659563e-47	3.95044442290412e-46	-	Contig1203	107823	108536	+	714	protein_coding	- && - && - && -	-
FPSE_06917	691.541187448331	725.740083559942	616.393551450348	155.288473049042	142.80422139606	167.740884231249	677.891607486207	155.277859558784	2.12690803951684	2.04615278098102e-47	5.06302921528292e-46	-	Contig1360	103903	104481	+	579	protein_coding	- && - && - && PF00583:Acetyltransferase (GNAT) family	Acetyltransf_1
FPSE_02132	1204.62013297451	1046.79596158513	992.243277944462	166.830183883768	91.0496713599042	104.83805264453	1081.2197908347	120.905969296068	3.16370446602365	2.11385794428085e-47	5.2203638004082e-46	-	Contig1195	210853	212313	-	1461	protein_coding	- && sp|P24639|ANXA7_DICDI Annexin A7 OS=Dictyostelium discoideum OX=44689 GN=nxnA PE=1 SV=1 && - && PF00191:Annexin	-
FPSE_01695	2693.15746900699	1917.68406185706	1607.63456345749	248.671406166372	298.067871504528	272.578936875779	2072.82536477385	273.10607151556	2.92354567720675	2.29791199528672e-47	5.66386129733218e-46	-	Contig1190	591432	592436	+	1005	protein_coding	- && - && - && -	-
FPSE_06673	437.029694707083	346.048251763681	339.76815275068	31.4773931856167	13.4178463056701	15.975322307738	374.282033073814	20.2901872663416	4.21674466512254	2.4408165888481e-47	5.99289072758301e-46	-	Contig1357	14925	15904	-	924	protein_coding	- && sp|A1KIG2|GLST_MYCBP Glycolipid sulfotransferase BCG_1434 OS=Mycobacterium bovis (strain BCG / Pasteur 1173P2) OX=410289 GN=BCG_1434 PE=3 SV=1 && - && PF00685:Sulfotransferase domain	Sulfotransfer_1
FPSE_00467	12007.6697093301	10115.1826480811	12367.9616664997	36607.1590284327	34095.705880301	38549.451186216	11496.9380079703	36417.4386983165	-1.66339975080295	2.44086480024693e-47	5.99289072758301e-46	-	Contig0339	62269	63574	+	1197	protein_coding	- && sp|O13960|ECM33_SCHPO Cell wall protein ecm33 OS=Schizosaccharomyces pombe (strain 972 / ATCC 24843) OX=284812 GN=ecm33 PE=1 SV=2 && - && -	-
FPSE_03446	726.016847819655	453.707707867937	764.728910173358	56.65930773411	36.4198685439617	46.9275092789803	648.151155286984	46.668895185684	3.79893383166682	2.91260886709537e-47	7.13730014259792e-46	PKS3	Contig1213	20452	27574	-	6864	protein_coding	- && sp|S0DTP6|FSR1_GIBF5 Non-reducing polyketide synthase fsr1 OS=Gibberella fujikuroi (strain CBS 195.34 / IMI 58289 / NRRL A-6831) OX=1279085 GN=FSR1 PE=2 SV=1 && - && PF00109:Beta-ketoacyl synthase, N-terminal domain|PF16073:Starter unit:ACP transacylase in aflatoxin biosynthesis|PF02801:Beta-ketoacyl synthase, C-terminal domain|PF07993:Male sterility protein|PF00698:Acyl transferase domain|P…	ketoacyl-synt
FPSE_05141	666.191437175298	757.461173304946	750.697187050911	2193.97430503748	2491.88574248159	2651.9035030845	724.783265843718	2445.92118353452	-1.75470514235497	3.27713971610469e-47	8.01507395044986e-46	-	Contig1245	80206	81372	-	1167	protein_coding	- && - && - && PF10544:T5orf172 domain	-
FPSE_10700	1047.45168128171	956.438918069062	1037.34524512376	41.9698575808222	32.5861981709131	89.8611879810261	1013.74528149151	54.8057479109205	4.20978531901869	3.31281480794005e-47	8.08671499071145e-46	-	Contig1644	5421	7559	-	2139	protein_coding	- && - && - && -	-
FPSE_01852	901.437119709041	836.283275095562	782.769697045076	195.159837750823	139.928968616274	143.777900769642	840.163363949893	159.622235712246	2.39814562586959	3.89826532716118e-47	9.49752373650095e-46	-	Contig1192	37350	39247	+	1743	protein_coding	- && - && - && -	-
FPSE_09738	708.779017633993	545.025996527797	335.759089001409	16.7879430323289	22.0436046450294	13.9784070192707	529.8547010544	17.6033182322097	4.90853641875671	5.32048567660252e-47	1.29376646903795e-45	-	Contig1596	12239	12539	+	228	protein_coding	- && - && - && -	-
FPSE_00176	1838.36388980033	1547.60468149868	1277.88907007999	280.148799351988	314.360970589985	313.515700289358	1554.619213793	302.675156743777	2.36027274660673	7.04494171675852e-47	1.70981545229145e-45	-	Contig0333	260098	263079	+	2934	protein_coding	- && - && - && PF11915:Protein of unknown function (DUF3433)	-
FPSE_06425	4409.84255749676	3471.05621421848	3794.57883868458	1186.69772309775	1117.51491374367	1075.33888283961	3891.82587013327	1126.51717322701	1.78862188334161	8.58341177121959e-47	2.0792207214069e-45	-	Contig1331	14459	15253	+	738	protein_coding	- && sp|Q8GY96|PGM_ARATH Phosphoglycerate mutase-like protein OS=Arabidopsis thaliana OX=3702 GN=PGM PE=2 SV=1 && - && PF00300:Histidine phosphatase superfamily (branch 1)	-
FPSE_11480	3242.74005492634	4059.33824221673	2453.54701455358	524.623219760278	514.670247581774	522.193347934185	3251.87510389888	520.495605092079	2.64340890046559	8.89300847885445e-47	2.15010542783601e-45	-	Contig2156	413300	415338	-	1989	protein_coding	- && sp|Q4WD45|FSQD_ASPFU ATP-grasp enzyme fsqD OS=Neosartorya fumigata (strain ATCC MYA-4609 / Af293 / CBS 101355 / FGSC A1100) OX=330879 GN=fsqD PE=2 SV=1 && - && PF13535:ATP-grasp domain|PF18130:ATP-grasp N-terminal domain	-
FPSE_06651	878.115349457851	727.662573847518	489.105777411008	65.0532792502744	48.8792972563696	49.9228822116812	698.294566905459	54.6184862394417	3.6785401640306	9.48299471049224e-47	2.28838209499478e-45	-	Contig1356	178975	180420	+	1446	protein_coding	- && sp|Q9Z2F6|BCL3_MOUSE B-cell lymphoma 3 protein homolog OS=Mus musculus OX=10090 GN=Bcl3 PE=1 SV=2 && - && PF12796:Ankyrin repeats (3 copies)	-
FPSE_08374	3535.7831680826	3236.5123991342	3187.20568067009	1304.21332432405	1343.70146575353	1279.02424226327	3319.83374929563	1308.97967744695	1.34255529661126	1.17007484401372e-46	2.81818977163686e-45	-	Contig1570	51459	52316	+	807	protein_coding	- && sp|B8H1Z0|XDH_CAUVN D-xylose 1-dehydrogenase OS=Caulobacter vibrioides (strain NA1000 / CB15N) OX=565050 GN=xylB PE=1 SV=1 && - && PF13561:Enoyl-(Acyl carrier protein) reductase	-
FPSE_00546	925.772879971153	600.778214867501	579.309711769595	70.2995114478772	70.922901901399	55.9136280770829	701.95360220275	65.7120138087864	3.41699360618651	1.24128521557168e-46	2.98403081519499e-45	-	Contig0340	77591	78103	-	513	protein_coding	- && - && - && -	-
FPSE_02617	6265.44427748275	7642.86013825841	8593.42814656143	27821.818590327	27561.2147294396	29038.1436672465	7500.57752076753	28140.3923290044	-1.90755504071992	1.28675126633294e-46	3.08747193052501e-45	-	Contig1201	25903	26430	+	471	protein_coding	- && sp|Q01302|CCG6_NEUCR Clock-controlled protein 6 OS=Neurospora crassa (strain ATCC 24698 / 74-OR23-1A / CBS 708.71 / DSM 1257 / FGSC 987) OX=367110 GN=ccg-6 PE=2 SV=2 && - && -	-
FPSE_01760	282.903213047044	496.002494194609	312.706972443103	2591.63870561577	2799.53778991874	2809.65981087342	363.870893228252	2733.61210213598	-2.90858335207346	1.60321255551125e-46	3.83952738483403e-45	-	Contig1190	762450	763669	+	1119	protein_coding	- && - && - && PF12697:Alpha/beta hydrolase family	-
FPSE_07338	473.53333510025	589.243273142045	445.006076169032	80.7919758430828	75.7149898677098	79.8766115386899	502.594228137109	78.7945257498275	2.67417432641961	1.72147766255761e-46	4.11498122772498e-45	-	Contig1365	70873	72675	-	1614	protein_coding	- && - && - && -	-
FPSE_06660	6292.82200777763	5013.85466999822	4614.43237541041	1356.67564630008	1172.14471655961	1220.11524125349	5307.03635106209	1249.64520137106	2.08652914042547	1.81439631483311e-46	4.32892408900578e-45	-	Contig1356	203321	204601	+	1281	protein_coding	- && sp|A0A2U8U2L4|ASL4_SARSH FAD-dependent monooxygenase asL4 OS=Sarocladium schorii OX=2203296 GN=asL4 PE=1 SV=1 && - && PF01494:FAD binding domain	FAD_binding_3
FPSE_08270	771.646398311114	684.406542377058	618.398083324983	156.337719488563	132.261627870177	148.77018899081	691.483674671052	145.78984544985	2.24691428557743	1.98452256412633e-46	4.72592412874369e-45	-	Contig1567	11626	13422	+	1797	protein_coding	- && - && - && -	-
FPSE_02815	365.03640393167	366.234399783229	287.650324010162	34.6251325041783	37.3782861372238	40.9367634135786	339.640375908354	37.6467273516602	3.17255792990446	2.02491966231813e-46	4.81307827427925e-45	-	Contig1203	32662	34036	+	1275	protein_coding	- && - && - && -	-
FPSE_00059	8993.07740686107	9623.02513446169	10348.3958028046	25749.5568722739	26423.5730462375	29569.3231339788	9654.83278137579	27247.4843508301	-1.49679926840687	2.43123108392351e-46	5.76802745360055e-45	-	Contig0332	164311	166022	+	1362	protein_coding	- && sp|Q9C413|TBA_COLOR Tubulin alpha chain OS=Colletotrichum orbiculare (strain 104-T / ATCC 96160 / CBS 514.97 / LARS 414 / MAFF 240422) OX=1213857 GN=TUB1 PE=3 SV=2 && - && PF03953:Tubulin C-terminal domain|PF00091:Tubulin/FtsZ family, GTPase domain	Tubulin
FPSE_06308	723.988867797813	595.010744004773	571.291584271054	125.909572742467	127.469539903866	112.825713798399	630.09706535788	122.068275481577	2.36766030712422	2.908100094601e-46	6.8864897380374e-45	-	Contig1273	579872	581356	+	1485	protein_coding	- && sp|G1UB37|FLU1_CANAL Major facilitator superfamily multidrug transporter FLU1 OS=Candida albicans (strain SC5314 / ATCC MYA-2876) OX=237561 GN=FLU1 PE=2 SV=1 && - && PF07690:Major Facilitator Superfamily	MFS_1
FPSE_03666	126.748751365163	188.404048182448	143.324029036422	793.23030827754	852.033240410051	934.556355002672	152.825609528011	859.939967896754	-2.49097702817103	4.31999655123206e-46	1.02108276693207e-44	-	Contig1216	239096	241116	+	1917	protein_coding	- && sp|Q9XWZ2|ACD11_CAEEL Acyl-CoA dehydrogenase family member 11 OS=Caenorhabditis elegans OX=6239 GN=acdh-11 PE=1 SV=1 && - && PF02770:Acyl-CoA dehydrogenase, middle domain|PF00441:Acyl-CoA dehydrogenase, C-terminal domain	-
FPSE_09897	699.653107535701	702.67020010903	555.255329273972	114.367861907741	76.6734074609719	97.8488491348951	652.526212306234	96.2967061678692	2.76335964799337	4.32835537623441e-46	1.02115333820323e-44	-	Contig1602	69269	71493	+	2124	protein_coding	- && - && - && -	-
FPSE_08832	431.959744652477	398.916734672021	411.93130023755	84.988961601165	72.8397370879234	84.868899759858	414.269259854016	80.8991994829821	2.35779979554395	4.34639378246324e-46	1.02350302658042e-44	-	Contig1580	34115	35280	-	1116	protein_coding	- && - && - && -	-
FPSE_01861	412.693934444972	417.180392403993	379.858790243385	71.3487578873978	50.7961324428939	46.9275092789803	403.244372364117	56.357466536424	2.84310775937122	4.49258194364315e-46	1.05596513254202e-44	-	Contig1192	62048	63016	-	906	protein_coding	- && sp|Q54528|RDMC_STREF Aclacinomycin methylesterase RdmC OS=Streptomyces purpurascens OX=1924 GN=rdmC PE=1 SV=1 && - && PF00561:alpha/beta hydrolase fold	Abhydrolase_1
FPSE_09545	1878.92349023718	2187.79394726149	1337.02276038173	209.849287904111	155.263650108468	239.62983461607	1801.2467326268	201.58092420955	3.16034584431677	7.11629749678511e-46	1.66956246271797e-44	-	Contig1593	252855	254203	+	1302	protein_coding	- && sp|A1DGM6|EXGB_NEOFI Probable glucan endo-1,6-beta-glucosidase B OS=Neosartorya fischeri (strain ATCC 1020 / DSM 3700 / CBS 544.65 / FGSC A1164 / JCM 1740 / NRRL 181 / WB 181) OX=331117 GN=exgB PE=3 SV=1 && - && PF00150:Cellulase (glycosyl hydrolase family 5)	-
FPSE_01746	2156.75675322962	3223.05496712117	2724.15881762934	12653.9120606179	11818.2473425156	12267.0506170543	2701.32351266004	12246.4033400626	-2.18050573946785	8.80363171124388e-46	2.06161201755543e-44	-	Contig1190	711593	714536	+	2883	protein_coding	- && sp|Q6ZFZ4|DEK1_ORYSJ Calpain-type cysteine protease ADL1 OS=Oryza sativa subsp. japonica OX=39947 GN=ADL1 PE=1 SV=1 && - && PF00648:Calpain family cysteine protease	Peptidase_C2
FPSE_01841	409.651964412208	290.296033423977	260.589143702586	7.34472507664389	8.62575833935934	8.98611879810261	320.17904717959	8.31886740470195	5.26342090656826	9.41796460707433e-46	2.20140578610747e-44	-	Contig1192	8974	10062	-	1089	protein_coding	- && - && - && -	-
FPSE_10231	1409.44611518062	1672.56655019112	1658.75012626069	4617.73358032996	5244.46107033048	5369.70521068843	1580.25426387748	5077.29995378296	-1.68385369938749	1.22526479174387e-45	2.85872553344441e-44	-	Contig1617	575	2952	+	2325	protein_coding	- && sp|P32581|IME2_YEAST Meiosis induction protein kinase IME2/SME1 OS=Saccharomyces cerevisiae (strain ATCC 204508 / S288c) OX=559292 GN=IME2 PE=3 SV=1 && - && PF00069:Protein kinase domain	Pkinase
FPSE_05067	65.9093507098849	76.8996115030402	112.253784979576	593.873484768634	638.306117112591	589.090010097838	85.0209157308336	607.089870659688	-2.8363491060936	1.54942813226199e-45	3.6084016558138e-44	-	Contig1244	58218	58847	-	630	protein_coding	- && - && - && -	-
FPSE_07543	259.581442795854	264.342414541701	275.623132762351	826.806194342198	939.249241396906	933.557897358438	266.515663366635	899.871111032514	-1.75582374190587	1.56998743869672e-45	3.64957263501811e-44	-	Contig1371	1048	5202	-	2277	protein_coding	- && - && - && PF04082:Fungal specific transcription factor domain	Fungal_trans
FPSE_03278	348.812563756929	325.862103744133	353.799875873126	52.4623219760278	59.4218907822533	44.9305939905131	342.824847791396	52.271602249598	2.71175681848913	1.88700746635975e-45	4.37847941232815e-44	-	Contig1209	38868	39930	+	951	protein_coding	- && - && - && -	-
FPSE_08446	601.296076476335	491.196268475669	438.992480545126	76.5949900850005	78.5902426474962	62.9028315867183	510.494941832377	72.6960214397383	2.81167560895336	2.46952827372265e-45	5.71964418643368e-44	-	Contig1573	12042	12869	-	828	protein_coding	- && - && - && PF00561:alpha/beta hydrolase fold	Abhydrolase_1
FPSE_00787	2008.71421163511	2011.88608594829	2321.24791082765	5808.62828918579	6143.45677281038	6650.72636824017	2113.94940280368	6200.93714341211	-1.55260709820578	2.91817408596204e-45	6.74641377646955e-44	-	Contig0344	118430	120741	-	2181	protein_coding	- && - && - && -	-
FPSE_05985	205.839972217025	194.171519045176	261.591409639904	1054.49267171816	1289.07166293759	1458.74661822532	220.534300300702	1267.43698429369	-2.52336715045246	3.20701936611614e-45	7.40067911645271e-44	-	Contig1265	102121	103502	-	1125	protein_coding	- && - && - && -	-
FPSE_01658	265.665382861382	320.094632881405	258.584611827951	26.2311609880139	28.7525277978645	25.9598987500742	281.448209190246	26.9811958453175	3.38203204387193	3.26944109371057e-45	7.53100894840349e-44	-	Contig1190	475094	476005	+	912	protein_coding	- && - && - && -	-
FPSE_06733	155.14047167096	138.419300705472	145.328560911058	569.740816659661	547.256445752687	601.071501828641	146.29611109583	572.68958808033	-1.96933114149954	4.20084917964668e-45	9.65890349490812e-44	-	Contig1357	164188	165668	-	1431	protein_coding	- && - && - && PF11710:G protein-coupled glucose receptor regulating Gpa2	-
FPSE_02323	354.896503822457	542.142261096433	419.949427736091	2502.45275825652	3665.94729422772	2906.51020236408	438.996064218327	3024.97008494944	-2.78429505773279	5.18637558465497e-45	1.19032957032598e-43	-	Contig1197	42304	43755	-	1401	protein_coding	- && - && - && -	-
FPSE_01697	2160.8127132733	1508.19363060338	1536.47368190794	284.34578511007	214.685540890721	183.716206538987	1735.16000859487	227.582510846593	2.93147502717357	7.21332356912615e-45	1.65254242852187e-43	-	Contig1190	597931	599976	+	1758	protein_coding	- && - && - && PF10373:Est1 DNA/RNA binding domain	-
FPSE_10080	327.518773527582	479.661326750213	695.572560498441	22.0341752299317	15.3346814921944	12.9799493750371	500.917553592079	16.7829353657211	4.90424498243388	8.10683772076659e-45	1.85389038058469e-43	-	Contig1610	90452	91366	+	915	protein_coding	- && - && - && -	-
FPSE_11672	1744.06281878465	1628.34927357688	1535.47141597062	4819.18889671791	4280.29297150876	4969.32369535074	1635.96116944405	4689.6018545258	-1.51929882954663	8.84982499032272e-45	2.02015194238556e-43	-	Contig2161	218268	220708	-	2118	protein_coding	- && - && - && -	-
FPSE_10704	593.184156388964	577.708331416589	617.395817387665	44.0683504598633	65.1723963418262	90.8596456252597	596.096101731073	66.7001308089831	3.15707855096425	1.04088934425287e-44	2.37176746444956e-43	-	Contig1644	14077	15783	+	957	protein_coding	- && - && - && -	-
FPSE_04042	456.295504914588	425.831598698085	356.806673685079	66.102525689795	68.0476491216126	59.9074586540174	412.977925765917	64.6858778218083	2.67430939090519	1.05718913484132e-44	2.40458333021627e-43	-	Contig1220	319645	321873	+	2229	protein_coding	- && - && - && PF06985:Heterokaryon incompatibility protein (HET)	-
FPSE_10443	1798.8182793744	1736.96997482492	2085.71541555801	5192.72062918723	5685.33316323107	5515.48002674654	1873.83455658577	5464.51127305494	-1.54421447611173	1.06217946567502e-44	2.41160423846537e-43	-	Contig1627	46877	48388	-	1512	protein_coding	- && sp|Q2U100|M2DH_ASPOR Mannitol 2-dehydrogenase OS=Aspergillus oryzae (strain ATCC 42149 / RIB 40) OX=510516 GN=AO090011000230 PE=3 SV=1 && - && PF01232:Mannitol dehydrogenase Rossmann domain|PF08125:Mannitol dehydrogenase C-terminal domain	Mannitol_dh_C
FPSE_10256	123.706781332399	206.667705914421	207.469049024751	3234.82677304187	1669.56344746266	3283.92719188439	179.28117875719	2729.43913746297	-3.92777786947562	1.0929234187e-44	2.47696722567268e-43	-	Contig1618	36736	38370	-	1539	protein_coding	- && sp|P53099|TPN1_YEAST Vitamin B6 transporter TPN1 OS=Saccharomyces cerevisiae (strain ATCC 204508 / S288c) OX=559292 GN=TPN1 PE=1 SV=1 && - && PF02133:Permease for cytosine/purines, uracil, thiamine, allantoin	-
FPSE_05888	3554.03498827918	2918.34025654038	2765.25172105937	850.93886245117	844.365899663954	735.863283800181	3079.20898862631	810.389348638435	1.92586128754239	1.14917256741404e-44	2.59979772438723e-43	-	Contig1264	169521	171205	-	1617	protein_coding	- && - && - && PF14420:Clr5 domain	-
FPSE_09639	487.729195253148	564.250899403557	569.287052396419	113.31861546822	80.5070778340205	85.8673574040916	540.422382351042	93.2310169021107	2.53834759541132	1.24531716228519e-44	2.81228576274351e-43	-	Contig1595	83921	89585	+	5550	protein_coding	- && sp|A4REK3|SEC13_MAGO7 Protein transport protein SEC13 OS=Magnaporthe oryzae (strain 70-15 / ATCC MYA-4617 / FGSC 8958) OX=242507 GN=SEC13 PE=3 SV=3 && - && PF00400:WD domain, G-beta repeat|PF17100:N-terminal domain of NWD NACHT-NTPase	WD40
FPSE_04549	1856.61570999691	2955.82881714811	2832.40353885965	16180.4293438465	15067.2829836742	20330.594551885	2548.28268866822	17192.7689598019	-2.75413714306798	1.26562687579411e-44	2.85306528281771e-43	-	Contig1231	83558	84848	-	1188	protein_coding	- && sp|A0A2Z5TTA9|HIME_ASPJA Efflux pump himE OS=Aspergillus japonicus OX=34381 GN=himE PE=3 SV=1 && - && PF04479:RTA1 like protein	RTA1
FPSE_09912	4583.2348493643	4788.92330635183	5118.57214188118	12166.0124662408	11442.5476459568	12814.2054060943	4830.24343253244	12140.9218394307	-1.32969158892966	1.28026442763131e-44	2.88093606281725e-43	-	Contig1603	30742	32798	-	2001	protein_coding	- && - && - && -	-
FPSE_10476	397.484084281152	682.484052089482	711.608815495523	4999.65928431544	5427.51883064355	4191.52519049275	597.192317288719	4872.90110181725	-3.0282943853125	1.38632735538479e-44	3.11407469244147e-43	-	Contig1629	123	455	+	333	protein_coding	- && - && - && -	-
FPSE_04216	5020.26454407139	3212.4812705395	3722.41569119771	598.070470526716	687.185414368961	741.854029665582	3985.05383526953	675.703304853753	2.55989307454507	1.39066994592704e-44	3.11812008812797e-43	-	Contig1223	47960	48529	+	522	protein_coding	- && - && - && PF00536:SAM domain (Sterile alpha motif)	SAM_1
FPSE_10448	742.240687994396	936.252770049514	915.068800771004	4228.46315126784	3784.79107579223	5475.54172097719	864.520752938305	4496.26531601242	-2.37860472138853	1.39305073003428e-44	3.11812008812797e-43	-	Contig1627	61860	64003	+	1959	protein_coding	- && sp|A1CFM2|PATO_ASPCL FAD-linked oxidoreductase patO OS=Aspergillus clavatus (strain ATCC 1007 / CBS 513.65 / DSM 816 / NCTC 3887 / NRRL 1) OX=344612 GN=patO PE=1 SV=1 && - && PF01565:FAD binding domain|PF08031:Berberine and berberine like	FAD_binding_4
FPSE_00177	252.483512719405	226.853853933969	244.552888705504	904.450430866719	889.411526547275	782.790793079161	241.296751786293	858.884250164385	-1.83202524593032	1.51123348628318e-44	3.37668730824015e-43	-	Contig0334	483	15260	-	14727	protein_coding	- && sp|Q12019|MDN1_YEAST Midasin OS=Saccharomyces cerevisiae (strain ATCC 204508 / S288c) OX=559292 GN=MDN1 PE=1 SV=1 && - && PF17867:Midasin AAA lid domain|PF07728:AAA domain (dynein-related subfamily)|PF17865:Midasin AAA lid domain	AAA_5
FPSE_02189	657.065527077007	589.243273142045	412.933566174867	50.3638290969866	28.7525277978645	24.9614411058406	553.080788797973	34.6925993335639	4.00048252451189	1.54754503788236e-44	3.45173381776965e-43	-	Contig1195	340070	341827	+	1617	protein_coding	- && - && - && PF00170:bZIP transcription factor	bZIP_1
FPSE_07775	583.044256279751	331.629574606861	318.720568067009	13.6402037137672	11.5010111191458	14.9768646635044	411.131466317874	13.3726931654725	4.94388431280627	1.59097364929407e-44	3.54236294602927e-43	-	Contig1488	20729	21652	-	924	protein_coding	- && - && - && -	-
FPSE_03295	591.156176367122	401.800470103385	431.976618983902	43.0191040203428	49.8377148496318	57.9105433655502	474.97775515147	50.2557874118416	3.23880968822984	1.77693105537923e-44	3.94946307729816e-43	-	Contig1209	82064	83410	-	1347	protein_coding	- && - && - && -	-
FPSE_05301	1194.4802328653	1060.25339359817	1027.32258575058	253.917638363974	185.933013092857	169.737799519716	1094.01873740468	203.196150325516	2.43023443105521	2.02145731994866e-44	4.48508630235194e-43	-	Contig1247	305093	308596	+	3387	protein_coding	- && - && - && PF01764:Lipase (class 3)	Lipase_3
FPSE_09871	1615.28608739764	2463.67130352865	1851.18518622568	287.493524428632	217.560793670508	319.50644615476	1976.71419238399	274.853588084633	2.84707005476946	2.12855500047297e-44	4.71445162604756e-43	-	Contig1602	1038	1439	-	339	protein_coding	- && - && - && -	-
FPSE_02834	478.603285154857	413.335411828841	376.851992431432	65.0532792502744	68.0476491216126	74.8843233175218	422.930229805043	69.3284172298029	2.60823935282282	2.48680281162459e-44	5.49830799659195e-43	-	Contig1203	74647	77886	-	3129	protein_coding	- && - && - && PF05729:NACHT domain	NACHT
FPSE_02602	927.800859992995	537.336035377493	861.948706093169	74.4964972059594	43.1287916967967	58.9090010097838	775.695200487886	58.84476330418	3.723634204555	3.56237907569975e-44	7.86267953136588e-43	-	Contig1200	51006	52186	+	1107	protein_coding	- && sp|A0A2Z5TIQ0|HIMH_ASPJA Trans-enoyl reductase himH OS=Aspergillus japonicus OX=34381 GN=himH PE=3 SV=1 && - && PF00107:Zinc-binding dehydrogenase	ADH_zinc_N
FPSE_08704	319.406853440211	336.435800325801	348.788546186538	61.9055399317128	55.5882204092047	52.918255144382	334.87706665085	56.8040051617665	2.56105308806544	4.39843474723244e-44	9.69109040220658e-43	-	Contig1576	289776	291313	-	1365	protein_coding	- && - && - && -	-
FPSE_09515	3029.80215263286	3295.14835290527	2716.1406901308	1020.9167856535	1042.75834146922	1047.38206880107	3013.69706522298	1037.01906530793	1.53911155887943	5.19820342869307e-44	1.14333401455056e-42	-	Contig1593	172863	173585	-	723	protein_coding	- && - && - && -	-
FPSE_06681	796.996148584147	506.576190776277	602.361828327901	8.39397151616444	33.5446157641752	11.9814917308035	635.311389229442	17.9733596703811	5.13032058363066	5.7902842802327e-44	1.27135375296825e-42	-	Contig1357	34035	35292	-	1203	protein_coding	- && - && - && -	-
FPSE_02990	1774.48251911229	2678.02897059337	1889.27129184375	14078.7887254868	11339.0385458845	16549.4354531723	2113.9275938498	13989.0875748479	-2.72618973977062	6.62279260630678e-44	1.45162905760036e-42	-	Contig1205	201815	203414	-	1479	protein_coding	- && sp|Q99288|DET1_YEAST Broad-range acid phosphatase DET1 OS=Saccharomyces cerevisiae (strain ATCC 204508 / S288c) OX=559292 GN=DET1 PE=1 SV=1 && - && PF00300:Histidine phosphatase superfamily (branch 1)	-
FPSE_03390	1744.06281878465	1135.23051481363	1031.33164949985	160.534705246645	156.22206770173	122.810290240736	1303.54166103271	146.52235439637	3.15331905517435	6.6723446813094e-44	1.45996433104506e-42	-	Contig1212	19618	20475	+	858	protein_coding	- && - && - && PF05705:Eukaryotic protein of unknown function (DUF829)	-
FPSE_03095	872.031409392323	915.105376886178	1010.28406481618	2411.16831801824	2512.01251194009	2527.0962975553	932.47361703156	2483.42570917121	-1.41325008227805	6.7177329942258e-44	1.4673613673077e-42	-	Contig1206	47723	53203	+	5481	protein_coding	- && sp|Q09706|PLD1_SCHPO Phospholipase D1 OS=Schizosaccharomyces pombe (strain 972 / ATCC 24843) OX=284812 GN=pld1 PE=1 SV=1 && - && PF00614:Phospholipase D Active site motif	-
FPSE_12043	468.463385045644	588.282027998257	622.407147074254	95.4814259963705	105.425935258836	87.8642726925589	559.717520039385	96.2572113159219	2.53915305246946	6.85236844689681e-44	1.4941937324223e-42	-	Contig2170	31296	33435	+	1659	protein_coding	- && sp|Q4WRQ4|MFSB_ASPFU Major facilitator superfamily multidrug transporter mfsB OS=Neosartorya fumigata (strain ATCC MYA-4609 / Af293 / CBS 101355 / FGSC A1100) OX=330879 GN=mfsB PE=2 SV=1 && - && PF07690:Major Facilitator Superfamily	MFS_1
FPSE_11949	3968.75690274599	5065.76190776277	4654.52301290311	14779.6853470865	13775.3360679569	15396.2168740825	4563.01394113729	14650.412763042	-1.68281375765328	7.81103194076638e-44	1.70030865391012e-42	-	Contig2165	38351	39871	+	1521	protein_coding	- && - && - && -	-
novel.305	168178.355231386	152336.207897235	148659.090620764	67553.6335156519	68448.2676755962	66140.8297269679	156391.217916462	67380.910306072	1.21474586610894	9.24589122831842e-44	2.00919718647626e-42	-	Contig1241	9035	9799	+	619	-	- && - && -	-
FPSE_07624	136.888651474376	177.83035160078	117.265114666164	893.957966471513	781.110338508652	1022.42062769523	143.994705913774	899.162977558465	-2.64127262041401	9.44425608741051e-44	2.04878904745554e-42	-	Contig1402	29237	31095	+	1650	protein_coding	- && sp|P32947|LIP3_DIURU Lipase 3 OS=Diutina rugosa OX=5481 GN=LIP3 PE=1 SV=1 && - && PF00135:Carboxylesterase family	COesterase
FPSE_10247	1560.53062680789	1267.88234465638	1265.86187883218	373.531732469318	380.491784525073	342.470971972133	1364.75828343215	365.498162988841	1.90053056503795	1.14584680146286e-43	2.48149284234751e-42	-	Contig1618	16254	18427	+	2124	protein_coding	- && sp|A0A455M2Z1|ATNE_ARTSZ Transcription factor atnE OS=Arthrinium sp. OX=1756131 GN=atnE PE=2 SV=1 && - && PF00172:Fungal Zn(2)-Cys(6) binuclear cluster domain|PF11951:Fungal specific transcription factor domain	Zn_clus
FPSE_02307	3963.68695269139	3546.99458057773	3023.83633288732	933.829331173294	782.068756101914	947.536304377709	3511.50595538548	887.811463884306	1.98401737250513	1.60507895144805e-43	3.47009304366815e-42	-	Contig1197	4852	6023	-	1074	protein_coding	- && sp|M2YMU7|PK81H_PSEFD Aldo-keto reductase MYCFIDRAFT_87468 OS=Pseudocercospora fijiensis (strain CIRAD86) OX=383855 GN=MYCFIDRAFT_87468 PE=2 SV=1 && - && PF00248:Aldo/keto reductase family	Aldo_ket_red
FPSE_07339	256.53947276309	353.738212913985	432.97888492122	18.88643591137	10.5425935258836	17.9722375962052	347.752190199432	15.8004223444863	4.46691466491805	1.87518229782272e-43	4.04713535453425e-42	-	Contig1365	74041	74276	-	186	protein_coding	- && - && - && -	-
FPSE_03175	1399.3062150714	1883.0792366807	1823.12173998078	7047.78833425957	6124.28842094513	7150.95364800121	1701.83573057763	6774.3434677353	-1.99284120062478	1.99397969498492e-43	4.29621237342924e-42	-	Contig1207	82130	83645	-	1353	protein_coding	- && - && - && -	-
FPSE_06076	2281.47752457294	4467.86742832663	4228.55998954312	34935.7094502764	32187.496452116	45375.9060998413	3659.3016474809	37499.7040007446	-3.35719695775123	2.13538493346587e-43	4.59307159967387e-42	-	Contig1269	34355	35716	+	1362	protein_coding	- && sp|Q8TFD4|DOTB_DOTSE Dothistromin biosynthesis peroxidase dotB OS=Dothistroma septosporum OX=64363 GN=dotB PE=2 SV=1 && - && PF01328:Peroxidase, family 2	-
FPSE_11482	252.483512719405	256.652453391397	269.609537138445	12.5909572742467	23.9604398315537	9.98457644233624	259.581834416416	15.5119911827122	4.05418601594766	3.24988204646131e-43	6.97843316044378e-42	-	Contig2156	421455	423595	-	2085	protein_coding	- && - && - && -	-
FPSE_04766	1646.7197777362	1643.72919587748	1622.66855251726	3561.14241573276	3730.16127297629	3892.9863548669	1637.70584204365	3728.09668119198	-1.18681545130271	3.79750334894235e-43	8.14053636679368e-42	-	Contig1237	104055	107020	+	2571	protein_coding	- && sp|P48562|CLA4_YEAST Serine/threonine-protein kinase CLA4 OS=Saccharomyces cerevisiae (strain ATCC 204508 / S288c) OX=559292 GN=CLA4 PE=1 SV=1 && - && PF00069:Protein kinase domain|PF00786:P21-Rho-binding domain	Pkinase
FPSE_11114	570.876376148695	576.747086272801	524.185085217125	123.811079863426	132.261627870177	149.768646635044	557.269515879541	135.280451456215	2.04186573962514	3.94506863314699e-43	8.44258015428027e-42	-	Contig1677	36412	37005	-	594	protein_coding	- && - && - && PF00293:NUDIX domain	NUDIX
FPSE_00652	10012.137367837	8495.48458079837	8386.961363474	2985.10612043598	2572.39282031561	2435.23819428581	8964.86110403645	2664.24571167913	1.75065228663748	4.09864078674359e-43	8.75643847002606e-42	-	Contig0342	73616	76203	-	2538	protein_coding	- && - && - && PF00004:ATPase family associated with various cellular activities (AAA)	AAA
FPSE_00078	7351.42757917947	8732.912131314	9352.14346111089	31848.8264252069	28212.9386928579	36051.3101603434	8478.82772386812	32037.6917594694	-1.91781749417394	4.25960329862093e-43	9.08500238892737e-42	-	Contig0332	231539	232369	+	831	protein_coding	- && - && - && PF10342:Ser-Thr-rich glycosyl-phosphatidyl-inositol-anchored membrane family	-
FPSE_07448	468.463385045644	450.823972436573	293.663919634068	28.329653867055	36.4198685439617	27.9568140385415	404.317092372095	30.9021121498527	3.70715835162085	4.33703586509618e-43	9.2346062814964e-42	-	Contig1366	150332	152671	+	1560	protein_coding	- && - && - && PF00082:Subtilase family	Peptidase_S8
FPSE_06470	862.905499294032	800.717204775406	963.177565762251	2758.46888949954	3263.41190505762	3502.58941597155	875.600089943896	3174.82340350957	-1.85855993500729	5.23278239873955e-43	1.11231745318173e-41	-	Contig1331	141806	144630	+	2637	protein_coding	- && - && - && PF11915:Protein of unknown function (DUF3433)	-
FPSE_01757	2427.49208614561	3532.57590342091	2428.49036612064	498.392058772264	424.578993815132	538.168670241923	2796.18611856238	487.04657427644	2.52166821092683	5.737901588196e-43	1.2176461511031e-41	-	Contig1190	751813	753021	+	1092	protein_coding	- && - && - && PF05368:NmrA-like family	NmrA
FPSE_04870	468.463385045644	431.599069560813	370.838396807526	70.2995114478772	61.3387259687776	46.9275092789803	423.633617137994	59.5219155652117	2.83296094879798	5.88647754360942e-43	1.24708668896301e-41	-	Contig1239	65823	66226	-	360	protein_coding	- && - && - && -	-
FPSE_02298	613.46395660739	626.731833749778	687.5544329999	2220.20546602549	1836.32810869028	2161.66079976579	642.583407785689	2072.73145816052	-1.68942653678323	6.92757896747096e-43	1.46520029948063e-41	-	Contig1196	101808	110118	-	7248	protein_coding	- && sp|Q7S9J6|IML1_NEUCR Vacuolar membrane-associated protein iml1 OS=Neurospora crassa (strain ATCC 24698 / 74-OR23-1A / CBS 708.71 / DSM 1257 / FGSC 987) OX=367110 GN=iml1 PE=3 SV=1 && - && PF01699:Sodium/calcium exchanger protein|PF12257:Vacuolar membrane-associated protein Iml1|PF00610:Domain found in Dishevelled, Egl-10, and Pleckstrin (DEP)	Na_Ca_ex
FPSE_02938	2737.77302948753	2704.94383461944	2681.06138232468	6560.93798632203	7249.4706754349	7903.79071175336	2707.92608214388	7238.06645783676	-1.41846206523838	8.52997122691473e-43	1.80110342456305e-41	-	Contig1205	41245	42442	-	1017	protein_coding	- && sp|Q09116|SPN2_SCHPO Septin homolog spn2 OS=Schizosaccharomyces pombe (strain 972 / ATCC 24843) OX=284812 GN=spn2 PE=1 SV=2 && - && PF00735:Septin	GTP_CDC
FPSE_08019	1848.50378990954	1587.97697753778	1481.34905535547	491.04733369562	502.210818869366	467.278177501336	1639.27660760093	486.845443355441	1.75138327927618	8.96514614785952e-43	1.88984087432999e-41	-	Contig1564	2805	4446	+	1215	protein_coding	- && sp|Q9D4V0|EKI1_MOUSE Ethanolamine kinase 1 OS=Mus musculus OX=10090 GN=Etnk1 PE=1 SV=2 && - && PF01633:Choline/ethanolamine kinase	Choline_kinase
FPSE_02814	2519.76517713945	1969.59129962162	2296.19126239471	619.055399317128	542.464357786376	475.265838655205	2261.84924638526	545.595198586236	2.05187670172867	9.03392872763336e-43	1.90117679485693e-41	-	Contig1203	28195	31914	+	3720	protein_coding	- && - && - && PF06985:Heterokaryon incompatibility protein (HET)	-
FPSE_05786	852.765599184819	953.555182637698	894.021216087334	2484.61556878467	2249.40609138626	2486.15953414172	900.113999303284	2406.72706477089	-1.418575047322	9.63171987548594e-43	2.02361955393916e-41	-	Contig1262	21795	23713	+	1875	protein_coding	- && sp|P39992|YEC3_YEAST Uncharacterized protein YEL023C OS=Saccharomyces cerevisiae (strain ATCC 204508 / S288c) OX=559292 GN=YEL023C PE=4 SV=1 && - && PF09994:Uncharacterized alpha/beta hydrolase domain (DUF2235)	-
FPSE_10285	3941.37917245112	4124.70291199432	3468.84240905635	1434.3198828246	1422.29170840103	1393.84687135014	3844.97483116726	1416.81948752526	1.44038103224539	1.08997855046506e-42	2.28624805560295e-41	-	Contig1618	106072	108216	+	1608	protein_coding	- && - && - && PF01926:50S ribosome-binding GTPase	-
FPSE_10356	26617.2377866843	27307.0520447296	25992.7648183956	11785.1360086949	10923.0853104087	10129.3528007501	26639.0182166032	10945.8580399512	1.28318622505273	1.16734444982158e-42	2.44447716277515e-41	-	Contig1622	40248	42571	+	1695	protein_coding	- && sp|Q9P3U1|YKX5_SCHPO Uncharacterized RNA-binding protein C328.05 OS=Schizosaccharomyces pombe (strain 972 / ATCC 24843) OX=284812 GN=SPAC328.05 PE=4 SV=3 && - && PF00076:RNA recognition motif. (a.k.a. RRM, RBD, or RNP domain)	RRM_1
FPSE_03694	101.399001092131	102.853230385316	119.269646540799	449.077476114798	494.543478123269	515.20414442455	107.840626006082	486.275032887539	-2.17343013113797	1.30978242202073e-42	2.73822335059086e-41	-	Contig1216	326894	328485	+	1404	protein_coding	- && - && - && PF16010:Cytochrome domain of cellobiose dehydrogenase|PF03188:Eukaryotic cytochrome b561	Cytochrom_B561
FPSE_03071	863.919489304953	1700.44265936098	1770.00164530295	13424.058947226	15268.5506782593	19136.4392093816	1444.78793132296	15943.016278289	-3.46391366613014	1.49730242176766e-42	3.12509462625609e-41	-	Contig1205	393690	396361	+	2424	protein_coding	- && sp|Q8LFT2|DRP3B_ARATH Dynamin-related protein 3B OS=Arabidopsis thaliana OX=3702 GN=DRP3B PE=1 SV=2 && - && PF01031:Dynamin central region|PF00350:Dynamin family	-
FPSE_07482	250.455532697563	216.280157352301	203.459985275481	11.5417108347261	10.5425935258836	9.98457644233624	223.398558441781	10.6896269343153	4.38683432741272	1.85561303773941e-42	3.86657262748693e-41	-	Contig1368	56161	57217	-	1005	protein_coding	- && sp|E1ACR0|NOTO_ASPSM NmrA-like family domain-containing oxidoreductase notO OS=Aspergillus sp. (strain MF297-2) OX=877550 GN=notO PE=1 SV=1 && - && PF00106:short chain dehydrogenase	adh_short
FPSE_10051	325.490793505739	305.675955724585	237.53702714428	26.2311609880139	28.7525277978645	23.962983461607	289.567925458202	26.3155574158284	3.45882197071397	2.0938778269874e-42	4.3558847602797e-41	-	Contig1610	10405	12429	+	2025	protein_coding	- && - && - && -	-
FPSE_03708	417.763884499578	443.134011286269	461.042331166114	1240.2092915133	1407.9154445021	1457.74816058109	440.64674231732	1368.62429886549	-1.63516593763045	2.31742590745853e-42	4.81302767567084e-41	-	Contig1216	356456	357344	-	837	protein_coding	- && - && - && PF06687:SUR7/PalI family	-
FPSE_07405	1469.27152582497	1336.13074986532	1134.56504104357	349.399064360345	368.032355812665	349.460175481768	1313.32243891129	355.630531884926	1.88454137737686	2.73026248377407e-42	5.66116127773055e-41	-	Contig1366	35016	35958	-	891	protein_coding	- && - && - && PF13640:2OG-Fe(II) oxygenase superfamily	-
FPSE_02897	909.549039796412	594.049498860986	608.375423951807	92.3336866778089	61.3387259687776	70.8904927405873	703.991320869735	74.8543017957246	3.235833169511	3.15475234204041e-42	6.53064663746894e-41	-	Contig1204	7013	9342	-	2043	protein_coding	- && - && - && PF04082:Fungal specific transcription factor domain	Fungal_trans
FPSE_00456	487.729195253148	464.281404449605	453.024203667573	1199.28868037199	1252.65179439363	1271.0365811094	468.344934456775	1240.99235195834	-1.40606862844438	3.27433680854369e-42	6.7671407875106e-41	-	Contig0339	15914	16896	-	912	protein_coding	- && sp|P36589|CDC14_SCHPO Cell division control protein 14 OS=Schizosaccharomyces pombe (strain 972 / ATCC 24843) OX=284812 GN=cdc14 PE=1 SV=1 && - && PF08045:Cell division control protein 14, SIN component	-
FPSE_10926	386.330194161018	329.707084319285	352.797609935809	61.9055399317128	57.505055595729	67.8951198078864	356.278296138704	62.4352384451094	2.51296256793266	3.92990384839509e-42	8.10878694712009e-41	-	Contig1659	29224	30711	-	1020	protein_coding	- && sp|S0EG57|ME178_GIBF5 Methyltransferase FFUJ_09178 OS=Gibberella fujikuroi (strain CBS 195.34 / IMI 58289 / NRRL A-6831) OX=1279085 GN=FFUJ_09178 PE=2 SV=1 && - && PF13489:Methyltransferase domain	-
FPSE_10644	462.379444980116	467.165139880969	402.910906801691	92.3336866778089	69.9644843081369	65.8982045194192	444.151830554259	76.0654585017883	2.54869870537084	4.07954531763455e-42	8.40386335432718e-41	-	Contig1638	16339	25747	+	9309	protein_coding	- && - && - && PF12340:Protein of unknown function (DUF3638)|PF12359:Protein of unknown function (DUF3645)	-
FPSE_05624	861.89150928311	866.08187455299	833.885259848275	2027.14412115371	2196.69312375685	2281.47571707383	853.952881228125	2168.4376539948	-1.34451790337529	4.40016694469359e-42	9.04962906206544e-41	-	Contig1253	12759	16492	+	3678	protein_coding	- && sp|O14260|YFP3_SCHPO UPF0592 membrane protein C7D4.03c OS=Schizosaccharomyces pombe (strain 972 / ATCC 24843) OX=284812 GN=SPAC7D4.03c PE=3 SV=1 && - && PF08578:Protein of unknown function (DUF1765)	-
FPSE_05677	523.218845635394	448.901482148997	402.910906801691	86.0382080406855	85.2991658003313	79.8766115386899	458.343744862027	83.7379951265689	2.4524574559769	5.15375720945902e-42	1.05823257838957e-40	-	Contig1257	4194	6695	+	2139	protein_coding	- && - && - && PF04082:Fungal specific transcription factor domain|PF00172:Fungal Zn(2)-Cys(6) binuclear cluster domain	Fungal_trans
FPSE_11387	3017.63427250181	2519.42352186835	1931.36646121109	412.353850731578	500.293983682842	412.363007068487	2489.47475186042	441.670280494302	2.49440850437739	5.68026585158361e-42	1.16445449957464e-40	-	Contig2156	175913	176762	+	792	protein_coding	- && - && - && PF01814:Hemerythrin HHE cation binding domain	-
FPSE_00563	2708.36731917081	2859.70430276931	2072.68595837288	357.793035876509	525.212841107658	368.430870722207	2546.91919343766	417.145582568791	2.60942774548526	5.89501862482395e-42	1.20652650982059e-40	-	Contig0340	126455	128203	-	1611	protein_coding	- && sp|P50276|MUP1_YEAST High-affinity methionine permease OS=Saccharomyces cerevisiae (strain ATCC 204508 / S288c) OX=559292 GN=MUP1 PE=1 SV=1 && - && PF13520:Amino acid permease	-
FPSE_12229	453.253534881824	380.653076940049	450.01740585562	1302.11483144501	1447.21056582585	1331.94249740765	427.974672559164	1360.4226315595	-1.66912684669871	6.25740693115433e-42	1.27863045823862e-40	-	Contig2177	11456	12211	-	708	protein_coding	- && sp|Q92254|ERG2_NEUCR C-8 sterol isomerase OS=Neurospora crassa (strain ATCC 24698 / 74-OR23-1A / CBS 708.71 / DSM 1257 / FGSC 987) OX=367110 GN=erg-1 PE=3 SV=2 && - && PF04622:ERG2 and Sigma1 receptor like protein	-
FPSE_00255	1544.30678663315	1788.87721258947	2030.59078900554	5614.51769787449	6240.25694972985	6253.34022583518	1787.92492940939	6036.03829114651	-1.75531326886517	6.29003289400817e-42	1.28322748364234e-40	-	Contig0335	116312	117888	+	1527	protein_coding	- && - && - && -	-
novel.498	406.609994379444	278.761091698521	318.720568067009	28.329653867055	36.4198685439617	28.9552716827751	334.697218048325	31.2349313645972	3.41828793054281	7.60278536491897e-42	1.5485480351794e-40	-	Contig1561	84055	85609	+	1502	-	- && Q06816.2 RecName: Full=Putative epoxide hydrolase; AltName: Full=Epoxide hydratase; Flags: Precursor && PF06441:Epoxide hydrolase N terminus	EHN
FPSE_07251	1233.01185328031	938.17526033709	1039.34977699839	277.001060033427	265.481673333615	269.583563943078	1070.1789635386	270.68876577004	1.983132105703	8.55304027363075e-42	1.73930123959274e-40	-	Contig1364	308061	310303	-	2193	protein_coding	- && sp|A0A142C7A3|PHNE_PENHR Putative transcription factor phnE OS=Penicillium herquei OX=69774 GN=phnE PE=4 SV=1 && - && PF04082:Fungal specific transcription factor domain	Fungal_trans
FPSE_07536	337.658673636795	385.459302658989	224.507569959151	8.39397151616444	4.79208796631075	5.99074586540174	315.875182084978	6.39226844929231	5.63681387570597	1.02434063939099e-41	2.07970698084047e-40	-	Contig1370	57816	59149	-	1047	protein_coding	- && - && - && PF01400:Astacin (Peptidase family M12A)	Astacin
FPSE_11423	163.25239175833	152.837977862292	157.355752158869	635.843342349456	666.100227317194	556.140907838128	157.815373926497	619.361492501593	-1.9729390686032	1.08890027604256e-41	2.2072444155493e-40	-	Contig2156	269854	271922	-	1680	protein_coding	- && sp|O14035|YEME_SCHPO Uncharacterized permease C29B12.14c OS=Schizosaccharomyces pombe (strain 972 / ATCC 24843) OX=284812 GN=SPAC29B12.14c PE=3 SV=2 && - && PF02133:Permease for cytosine/purines, uracil, thiamine, allantoin	-
FPSE_12447	1910.35718057574	1704.28763993613	1698.8407637534	513.081508925551	505.086071649153	390.396938895347	1771.16186142176	469.521506490017	1.91549309929787	1.50528464732134e-41	3.04639795477861e-40	-	Contig2200	6166	8140	-	1818	protein_coding	- && - && - && PF00172:Fungal Zn(2)-Cys(6) binuclear cluster domain	Zn_clus
FPSE_11383	226.119772435451	194.171519045176	230.521165583057	7.34472507664389	10.5425935258836	8.98611879810261	216.937485687895	8.95781246687671	4.59132749581306	1.67049600066771e-41	3.37536105780849e-40	-	Contig2156	165380	167423	+	1134	protein_coding	- && - && - && PF01544:CorA-like Mg2+ transporter protein	-
FPSE_06996	470.491365067486	284.528562561249	299.677515257974	19.9356823508905	14.3762638989322	8.98611879810261	351.56581429557	14.4326883493085	4.61146985849126	2.62792981246841e-41	5.30147178250993e-40	-	Contig1361	21574	22709	+	1032	protein_coding	- && - && - && PF14378:PAP2 superfamily	-
FPSE_01730	1002.83612080117	1237.12250005516	1200.71459290653	3262.10718046941	3405.25770886042	3517.56628063506	1146.89107125429	3394.97705665496	-1.56550876026916	2.97514580294655e-41	5.99238826351826e-40	-	Contig1190	680492	682134	+	1533	protein_coding	- && sp|P37302|APE3_YEAST Aminopeptidase Y OS=Saccharomyces cerevisiae (strain ATCC 204508 / S288c) OX=559292 GN=APE3 PE=1 SV=1 && - && PF04389:Peptidase family M28|PF02225:PA domain	-
FPSE_00865	940.982730134972	1217.8975971794	1300.94118663829	4139.27720390859	4200.744311268	4379.23522760867	1153.27383798422	4239.75224759509	-1.8781225795272	3.32943679112917e-41	6.69533884235165e-40	-	Contig0345	165151	166046	-	651	protein_coding	- && sp|O42785|RASL_COLTR Ras-like protein OS=Colletotrichum trifolii OX=5466 GN=RAS PE=2 SV=1 && - && PF00071:Ras family	Ras
FPSE_06108	792.940188540462	1082.36203190529	817.849004851193	3864.3746367542	3515.47573208556	4402.19975342605	897.717075098982	3927.35004075527	-2.12891597923316	3.43581602285102e-41	6.89831270895398e-40	-	Contig1270	13699	15775	+	1764	protein_coding	- && - && - && -	-
FPSE_03347	368.078373964434	516.188642214157	394.89277930315	27.2804074275344	51.7545500361561	37.9413904808777	426.386598493914	38.9921159815227	3.44535994304761	5.14794983692928e-41	1.03195215955787e-39	-	Contig1210	100722	101495	-	774	protein_coding	- && sp|Q5BD77|HOGA1_EMENI Probable 4-hydroxy-2-oxoglutarate aldolase, mitochondrial OS=Emericella nidulans (strain FGSC A4 / ATCC 38163 / CBS 112.46 / NRRL 194 / M139) OX=227321 GN=AN1503 PE=1 SV=1 && - && PF00701:Dihydrodipicolinate synthetase family	-
FPSE_03172	592.170166378043	823.787088226318	645.459263632559	3516.02481883338	3019.01541877577	4295.36478549305	687.138839412307	3610.13500770073	-2.39305732059868	5.41349170752322e-41	1.08346803226875e-39	-	Contig1207	74483	75902	-	1320	protein_coding	- && - && - && -	-
FPSE_08833	418.7778745105	334.513310038225	356.806673685079	57.7085541736305	65.1723963418262	63.9012892309519	370.032619411268	62.2607465821362	2.5696076493785	6.00258584004269e-41	1.19947570989749e-39	-	Contig1580	35912	36665	+	546	protein_coding	- && - && - && -	-
FPSE_10362	865.947469326796	917.989112317542	924.089194206863	55.6100612945894	46.9624620698453	112.825713798399	902.675258617067	71.7994123876114	3.65247285213938	7.76120586987811e-41	1.54845223882655e-39	-	Contig1623	7494	9902	-	2409	protein_coding	- && - && - && -	-
FPSE_10875	23.32177025119	41.3335411828841	47.106499053929	452.225215433359	691.977502335272	440.319821107028	37.2539368293344	528.17417962522	-3.82433195201755	8.04039127598035e-41	1.60163077162571e-39	-	Contig1656	58500	61006	+	2271	protein_coding	- && sp|Q8BGK6|YLAT2_MOUSE Y+L amino acid transporter 2 OS=Mus musculus OX=10090 GN=Slc7a6 PE=1 SV=1 && - && PF13520:Amino acid permease	-
FPSE_05656	527.274805679079	586.359537710681	678.534039564041	1976.78029205673	2015.5521986303	2300.44641231427	597.389460984601	2097.5929676671	-1.81198003158538	9.34710640891236e-41	1.85900299991383e-39	-	Contig1256	22437	22940	-	453	protein_coding	- && - && - && -	-
FPSE_10072	832.485798966393	1111.19938621893	861.948706093169	211.947780783152	208.935035331149	182.717748894753	935.211297092831	201.200188336351	2.21704371528436	9.82612927575352e-41	1.95121052969469e-39	-	Contig1610	64292	68002	-	2835	protein_coding	- && - && - && PF01544:CorA-like Mg2+ transporter protein	-
FPSE_06859	1104.2351218933	899.72545458557	818.851270788511	199.356823508905	138.970551023012	167.740884231249	940.937282422461	168.689419587722	2.48134337612669	1.03020192245037e-40	2.04250831854833e-39	-	Contig1359	40750	42332	-	1473	protein_coding	- && sp|Q9SU63|AL2B4_ARATH Aldehyde dehydrogenase family 2 member B4, mitochondrial OS=Arabidopsis thaliana OX=3702 GN=ALDH2B4 PE=1 SV=1 && - && PF00171:Aldehyde dehydrogenase family	Aldedh
FPSE_11043	4216.17046541079	4010.31473988355	4269.65289297314	8658.38161892362	8574.00378932319	9073.98307079517	4165.37936608916	8768.78949301399	-1.07396755424241	1.55376513212953e-40	3.07572663421078e-39	-	Contig1670	23133	24507	-	1212	protein_coding	- && sp|B4YQU1|FAH12_CLAPU Oleate hydroxylase FAH12 OS=Claviceps purpurea OX=5111 GN=FAH12 PE=1 SV=1 && - && PF00487:Fatty acid desaturase	-
FPSE_10830	5970.37318430465	4366.9366882289	2730.17241325325	10.4924643952056	28.7525277978645	35.9444751924104	4355.8274285956	25.0631557951602	7.43846952282429	1.69369312792988e-40	3.347488024609e-39	-	Contig1654	9162	10209	+	909	protein_coding	- && sp|Q8L817|ATCA7_ARATH Alpha carbonic anhydrase 7 OS=Arabidopsis thaliana OX=3702 GN=ACA7 PE=2 SV=1 && - && PF00194:Eukaryotic-type carbonic anhydrase	-
FPSE_03531	355.910493833379	422.947863266721	484.094447724419	1469.9942617683	1633.1435789187	1536.62631447555	420.98426827484	1546.58805172085	-1.87721051793122	2.51793135551701e-40	4.96879631511605e-39	PTH12	Contig1215	109890	111327	+	1326	protein_coding	- && sp|Q86IH1|HBX4_DICDI Homeobox protein 4 OS=Dictyostelium discoideum OX=44689 GN=hbx4 PE=3 SV=1 && - && PF05920:Homeobox KN domain	Coprinus_mating
FPSE_10183	991.682230681038	917.989112317542	927.095992018816	2256.92909140871	2301.16064142242	2495.14565293983	945.589111672465	2351.07846192365	-1.31419535589388	2.76240267224145e-40	5.44274952638054e-39	-	Contig1614	60893	62984	+	2037	protein_coding	- && sp|Q4I2M7|ERFB_GIBZE Palmitoyltransferase ERF2 OS=Gibberella zeae (strain ATCC MYA-4620 / CBS 123657 / FGSC 9075 / NRRL 31084 / PH-1) OX=229533 GN=ERF2 PE=3 SV=1 && - && PF01529:DHHC palmitoyltransferase	-
FPSE_04132	387.344184171939	385.459302658989	413.935832112185	1092.2655435409	1028.38207757029	1076.33734048385	395.579772981038	1065.66165386501	-1.42965797121475	2.97729331187664e-40	5.85703865965298e-39	-	Contig1222	25660	28106	+	2283	protein_coding	- && - && - && -	-
FPSE_08639	994.724200713802	892.996738579054	845.912451096087	2353.45976384461	2517.76301749967	2394.30143087223	911.211130129648	2421.84140407217	-1.41044204498815	3.10182568898555e-40	6.09256273701673e-39	-	Contig1576	85541	87418	+	1878	protein_coding	- && sp|I1RFN8|ATG15_GIBZE Putative lipase ATG15 OS=Gibberella zeae (strain ATCC MYA-4620 / CBS 123657 / FGSC 9075 / NRRL 31084 / PH-1) OX=229533 GN=ATG15 PE=3 SV=1 && - && PF01764:Lipase (class 3)	Lipase_3
FPSE_05506	4126.93934444972	3481.62991080014	3191.21474441936	1099.61026861754	1024.54840719724	1141.23708735903	3599.92799988974	1088.46525439127	1.72573977700893	3.17091153290647e-40	6.21861891801735e-39	-	Contig1252	26083	27846	+	1653	protein_coding	- && sp|A0A098DDI4|FUSA5_GIBZE Cytochrome P450 monooxygenase FGSG_08207 OS=Gibberella zeae (strain ATCC MYA-4620 / CBS 123657 / FGSC 9075 / NRRL 31084 / PH-1) OX=229533 GN=FGRAMPH1_01T09369 PE=3 SV=1 && - && PF00067:Cytochrome P450	p450
FPSE_01405	1198.53619290898	1116.00561193787	1236.79616664997	2829.81764738694	3191.53058556296	3160.11844399942	1183.77932383227	3060.48889231644	-1.37060715829712	3.17885270733884e-40	6.22455717917708e-39	-	Contig0375	7925	9246	+	1266	protein_coding	- && sp|Q9NVF9|EKI2_HUMAN Ethanolamine kinase 2 OS=Homo sapiens OX=9606 GN=ETNK2 PE=1 SV=3 && - && PF01633:Choline/ethanolamine kinase	Choline_kinase
FPSE_02887	242.343612610192	200.900235051693	262.593675577221	1045.04945376247	875.035262648342	1086.32191692618	235.279174413035	1002.13554444567	-2.09108577389759	3.88092468338134e-40	7.57799344350733e-39	-	Contig1203	196906	199494	-	2589	protein_coding	- && - && - && PF00884:Sulfatase	Sulfatase
FPSE_06671	2326.09308505348	1395.72794878018	1100.48799917477	1.04924643952056	0.958417593262149	1.99691528846725	1607.43634433614	1.33485977374998	10.2344033103828	3.88200942839708e-40	7.57799344350733e-39	-	Contig1357	12799	13876	+	1014	protein_coding	- && - && - && PF05368:NmrA-like family	NmrA
FPSE_00866	346.784583735087	411.412921541265	334.756823064091	1563.37719488563	1250.7349592071	1593.53840019686	364.318109446814	1469.21685142987	-2.01114190360487	3.94398501571162e-40	7.6871301790847e-39	-	Contig0346	1491	2926	+	1197	protein_coding	- && sp|Q9LRP2|PT317_ARATH Probable sugar phosphate/phosphate translocator At3g17430 OS=Arabidopsis thaliana OX=3702 GN=At3g17430 PE=1 SV=1 && - && PF03151:Triose-phosphate Transporter family	-
FPSE_11442	1472.31349585774	1497.61993402171	1186.68286978408	252.868391924454	274.107431672975	351.457090770235	1385.53876655451	292.810971455888	2.24213029684615	4.17513064192664e-40	8.12515055338995e-39	-	Contig2156	315844	316670	+	354	protein_coding	- && - && - && -	-
FPSE_10865	441.085654750768	245.117511665941	268.607271201127	8.39397151616444	6.70892315283505	9.98457644233624	318.270145872612	8.36249037044524	5.25259842818726	4.53168183824444e-40	8.80550263937404e-39	-	Contig1656	35742	36226	+	429	protein_coding	- && - && - && PF01042:Endoribonuclease L-PSP	Ribonuc_L-PSP
FPSE_01022	383.288224128254	362.389419208077	405.917704613644	1031.40925004871	1073.42770445361	1045.3851535126	383.865115983325	1050.07403600497	-1.45222725082272	4.80622657731388e-40	9.32466837794634e-39	-	Contig0348	228581	231605	-	2919	protein_coding	- && sp|Q8H116|MNS2_ARATH Mannosyl-oligosaccharide 1,2-alpha-mannosidase MNS2 OS=Arabidopsis thaliana OX=3702 GN=MNS2 PE=1 SV=1 && - && PF01532:Glycosyl hydrolase family 47	-
novel.502	540.456675821056	336.435800325801	392.888247428514	31.4773931856167	43.1287916967967	43.9321363462794	423.26024119179	39.5127737428976	3.41796125943834	5.11609404276474e-40	9.9106720837594e-39	-	Contig1562	3679	7173	+	3495	-	- && - && -	-
FPSE_07654	850.737619162976	722.856348128578	649.46832738183	176.273401839453	145.679474175847	167.740884231249	741.020764891128	163.231253415516	2.1836147221664	5.38814256980074e-40	1.04217371323367e-38	-	Contig1404	14005	15257	-	1149	protein_coding	- && - && - && PF01636:Phosphotransferase enzyme family	APH
FPSE_00974	3012.5643224472	2019.57604709859	2186.94427522709	449.077476114798	505.086071649153	512.208771491849	2406.36154825763	488.790773085266	2.29923577212949	5.92870242512992e-40	1.14498065585322e-38	-	Contig0348	93185	94078	-	834	protein_coding	- && - && - && PF01965:DJ-1/PfpI family	DJ-1_PfpI
FPSE_09567	226.119772435451	273.954865979581	233.52796339501	8.39397151616444	2.87525277978645	3.99383057693449	244.534200603347	5.08768495762846	5.60841722198191	6.60294310015306e-40	1.27325245260029e-38	-	Contig1593	307692	309539	-	1848	protein_coding	- && - && - && PF01048:Phosphorylase superfamily	-
FPSE_06576	1891.09137036824	1969.59129962162	2115.78339367754	5378.43724898237	6796.1391538219	6004.72427242101	1992.1553545558	6059.76689174176	-1.60500958852354	6.61552832006403e-40	1.27374055147251e-38	-	Contig1355	192686	193762	+	972	protein_coding	- && - && - && PF05730:CFEM domain	-
FPSE_01909	309.266953330998	321.055878025193	234.530229332327	32.5266396251372	23.9604398315537	27.9568140385415	288.28435356284	28.1479644984108	3.36037993515592	6.85109265400275e-40	1.31709397319516e-38	-	Contig1192	185446	186069	+	624	protein_coding	- && sp|A0A455LLX4|ATNL_ARTSZ NAD(P)H-dependent FMN reductase atnL OS=Arthrinium sp. OX=1756131 GN=atnL PE=2 SV=1 && - && PF03358:NADPH-dependent FMN reductase	FMN_red
FPSE_05810	2178.05054345897	2875.08422506992	1895.28488746765	488.948840816579	438.955257714064	384.406193029945	2316.13988533218	437.436763853529	2.40492950863142	7.47035190497692e-40	1.43396800430534e-38	-	Contig1262	90358	91829	+	1359	protein_coding	- && sp|A0A1L3THR9|CDA_PESTX Chitin deacetylase OS=Pestalotiopsis sp. OX=36460 GN=CDA PE=1 SV=1 && - && PF00187:Chitin recognition protein|PF01522:Polysaccharide deacetylase	Polysacc_deac_1
FPSE_12101	721.96088777597	631.538059468718	649.46832738183	195.159837750823	181.140925126546	200.689986490958	667.655758208839	192.330249789443	1.79582993676562	9.1228644319306e-40	1.74852601343614e-38	-	Contig2172	97696	98998	+	1254	protein_coding	- && sp|Q01911|TETX_BACFG Flavin-dependent monooxygenase OS=Bacteroides fragilis OX=817 GN=tetX PE=1 SV=1 && - && PF01494:FAD binding domain	FAD_binding_3
FPSE_07589	6999.57304538978	5434.88004297737	5232.83045873539	1360.87263205816	906.663043225993	1027.4129159164	5889.09451570084	1098.31619706685	2.42307297961142	9.84810698121611e-40	1.8846777544566e-38	-	Contig1376	32818	35900	+	2364	protein_coding	- && - && - && PF04479:RTA1 like protein|PF07690:Major Facilitator Superfamily	RTA1
FPSE_09168	325.490793505739	236.466305371849	285.645792135527	1113.25047233131	1074.38612204687	1255.06125880166	282.534297004372	1147.56595105995	-2.02284244968	1.01551157069295e-39	1.94050016426983e-38	-	Contig1588	165240	166843	+	1428	protein_coding	- && sp|J9VDQ4|VCX1_CRYNH Vacuolar calcium ion transporter OS=Cryptococcus neoformans var. grubii serotype A (strain H99 / ATCC 208821 / CBS 10515 / FGSC 9487) OX=235443 GN=VCX1 PE=3 SV=2 && - && PF01699:Sodium/calcium exchanger protein	Na_Ca_ex
FPSE_02095	3690.92363975356	2996.2011131872	2851.44659166868	713.487578873978	749.482557931001	525.188720866886	3179.52378153648	662.719619223955	2.26226280266768	1.02483349417665e-39	1.9553637858018e-38	-	Contig1195	120781	121600	+	771	protein_coding	- && - && - && -	-
FPSE_05730	804.094078660596	772.841095605554	852.92831265731	1965.238581222	1940.79562635585	1893.07569346695	809.954495641153	1933.0366336816	-1.25508432105304	1.0471298943458e-39	1.99490054608525e-38	-	Contig1259	32277	33998	+	1638	protein_coding	- && - && - && -	-
FPSE_12444	68.9513207426488	61.5196892024322	79.1790090480935	567.64232378062	643.098205078902	411.364549424253	69.8833396643915	540.701692761259	-2.9527420762348	1.14689294384821e-39	2.18167968552746e-38	-	Contig2199	12118	13499	-	1332	protein_coding	- && sp|D4ARV2|AIM6_ARTBC Altered inheritance of mitochondria protein 6 homolog ARB_06966 OS=Arthroderma benhamiae (strain ATCC MYA-4681 / CBS 112371) OX=663331 GN=ARB_06966 PE=1 SV=1 && - && -	-
FPSE_02540	1668.01356796555	1820.59830233448	1690.82263625486	3824.50327205242	4102.98571675526	3900.97401602077	1726.47816885163	3942.82100160948	-1.19134184908739	1.15301675695119e-39	2.19004037388524e-38	-	Contig1199	100660	103608	+	2901	protein_coding	- && - && - && PF00069:Protein kinase domain	Pkinase
FPSE_06336	606.366026530941	761.306153880098	934.111853580039	3298.83080585263	4044.52224356627	3696.29019895287	767.261344663693	3679.88108279059	-2.26186588455874	1.49550233609033e-39	2.8363052538815e-38	-	Contig1274	35983	38180	+	2100	protein_coding	- && - && - && -	-
FPSE_02777	1030.21385109605	980.470046663762	1056.38829793279	2275.81552732008	2401.79448871495	2334.39397221821	1022.3573985642	2337.33466275108	-1.19318793633431	1.78347988687989e-39	3.37741505035596e-38	-	Contig1202	367929	369603	-	1614	protein_coding	- && - && - && PF13257:Domain of unknown function (DUF4048)	-
FPSE_01021	2530.91906725958	2828.94445816809	2130.8173827373	578.134788175826	377.616531745287	430.335244664692	2496.89363605499	462.028854861935	2.43493792953298	1.80563652434553e-39	3.41427001894529e-38	-	Contig0348	226389	228319	+	1752	protein_coding	- && - && - && -	-
FPSE_10209	1028.1858710742	975.663820944822	1054.38376605816	2413.26681089728	2287.74279511675	2321.41402284317	1019.41115269239	2340.80787628573	-1.19932201618788	1.90244882107013e-39	3.59197080687593e-38	-	Contig1615	44528	47329	-	2802	protein_coding	- && - && - && PF13532:2OG-Fe(II) oxygenase superfamily|PF00857:Isochorismatase family	Isochorismatase
FPSE_03257	924.758889960231	809.368411069498	763.726644236041	251.819145484933	234.812310349227	230.643715817967	832.617981755257	239.091723884042	1.80042796796611	1.94800479990132e-39	3.67251083481397e-38	-	Contig1208	77291	79321	+	2031	protein_coding	- && sp|P39839|YUXL_BACSU Uncharacterized peptidase YuxL OS=Bacillus subtilis (strain 168) OX=224308 GN=yuxL PE=3 SV=3 && - && PF00326:Prolyl oligopeptidase family	-
FPSE_05017	1249.23569345505	1065.05961931711	823.862600475099	193.061344871782	202.226112178314	209.676105289061	1046.05263774909	201.654520779719	2.37475420171959	2.10646094528231e-39	3.96534230546531e-38	-	Contig1242	140114	140806	-	693	protein_coding	- && - && - && PF13302:Acetyltransferase (GNAT) domain	-
FPSE_09227	964.304500386162	903.570435160722	927.095992018816	2118.428561392	2069.22358385298	2090.77030702521	931.656975855233	2092.80748409006	-1.16766535811423	2.32600723283415e-39	4.37213436688069e-38	-	Contig1589	33871	35624	+	1476	protein_coding	- && sp|A0A089FNE5|PRLL_FUNXX MFS transporter prlL OS=Fungal sp. (strain NRRL 50135) OX=1547289 GN=prlL PE=3 SV=1 && - && PF07690:Major Facilitator Superfamily	MFS_1
FPSE_02649	673.289367251747	759.383663592522	692.565762686488	2063.86774653693	2574.30965550213	2183.62686793893	708.412931176919	2273.93475665933	-1.68251936441131	2.42482470482112e-39	4.55112654598205e-38	-	Contig1201	114710	116683	+	1974	protein_coding	- && - && - && -	-
FPSE_04311	1662.94361791094	1381.30927162336	1298.93665476366	265.4593491987	222.352881636819	338.477141395198	1447.72984809932	275.429790743572	2.39438936514006	2.59887010362376e-39	4.87057475485346e-38	-	Contig1224	123615	126007	-	2184	protein_coding	- && sp|Q8K268|ABCF3_MOUSE ATP-binding cassette sub-family F member 3 OS=Mus musculus OX=10090 GN=Abcf3 PE=1 SV=1 && - && PF12848:ABC transporter|PF00005:ABC transporter	ABC_tran
FPSE_04585	458.32348493643	428.715334129449	314.711504317739	27.2804074275344	7.66734074609719	8.98611879810261	400.583441127873	14.6446223239114	4.7897437536984	3.09388665604281e-39	5.78972674230523e-38	-	Contig1232	71253	73402	-	1530	protein_coding	- && sp|Q4WKX1|FGNC_ASPFU Short-chain dehydrogenase/reductase AFUA_1G00990 OS=Neosartorya fumigata (strain ATCC MYA-4609 / Af293 / CBS 101355 / FGSC A1100) OX=330879 GN=AFUA_1G00980 PE=2 SV=1 && - && PF00106:short chain dehydrogenase	adh_short
FPSE_00557	627.659816760289	846.85697167723	742.67905955237	131.155804940069	161.014155668041	162.748596010081	739.065282663296	151.63951887273	2.28411890226083	3.33386699967377e-39	6.2296107697444e-38	-	Contig0340	112506	113895	+	1347	protein_coding	- && - && - && -	-
FPSE_03483	612.449966596469	438.327785567329	415.94036398682	47.216089778425	56.5466380024668	69.8920350963536	488.906038716873	57.8849209590818	3.07662923680317	3.39098181391556e-39	6.32700273939562e-38	-	Contig1214	33252	33539	-	225	protein_coding	- && - && - && -	-
FPSE_02789	348.812563756929	216.280157352301	277.627664636986	2.09849287904111	8.62575833935934	7.98766115386899	280.906795248739	6.23730412408981	5.47457754916204	3.57111544694699e-39	6.65330317608402e-38	-	Contig1202	406357	408187	-	1677	protein_coding	- && sp|I1RF61|AURF_GIBZE Monooxygenase aurF OS=Gibberella zeae (strain ATCC MYA-4620 / CBS 123657 / FGSC 9075 / NRRL 31084 / PH-1) OX=229533 GN=aurF PE=1 SV=1 && - && PF00743:Flavin-binding monooxygenase-like	FMO-like
FPSE_10503	321.434833462054	304.714710580797	296.670717446021	54.5608148550689	50.7961324428939	61.9043739424847	307.606753829624	55.7537737468158	2.46454569179337	4.41702467870277e-39	8.21722256306688e-38	-	Contig1629	80189	81016	-	828	protein_coding	- && - && - && -	-
FPSE_00279	917.660959883782	686.329032664634	655.481923005736	152.14073373048	150.471562142157	144.776358413875	753.157305184717	149.129551428838	2.33627131138894	4.60504294845579e-39	8.55444121905959e-38	-	Contig0335	186770	187369	-	543	protein_coding	- && - && - && PF04749:PLAC8 family	-
FPSE_02679	4902.64170280452	4725.48112686182	4852.97166849201	2125.77328646864	2212.9862228423	2337.38934515091	4827.03149938611	2225.38295148729	1.11698058601253	5.7911677162512e-39	1.07420649776261e-37	-	Contig1202	53903	59158	-	5016	protein_coding	- && sp|O14139|HRP3_SCHPO Chromodomain helicase hrp3 OS=Schizosaccharomyces pombe (strain 972 / ATCC 24843) OX=284812 GN=hrp3 PE=1 SV=1 && - && PF00176:SNF2 family N-terminal domain|PF00271:Helicase conserved C-terminal domain|PF13907:Domain of unknown function (DUF4208)|PF00385:Chromo (CHRromatin Organisation MOdifier) domain	SNF2_N
FPSE_09494	52834.9635090656	38925.6220976952	37743.3306675076	11089.4856192927	8789.64774780717	9969.59957767273	43167.9720914228	9949.57764825755	2.11727664542333	5.83066080714853e-39	1.07995090300826e-37	-	Contig1593	105306	110102	+	4551	protein_coding	- && sp|I1RL06|ZRA1_GIBZE ZEB2-regulated ABC transporter 1 OS=Gibberella zeae (strain ATCC MYA-4620 / CBS 123657 / FGSC 9075 / NRRL 31084 / PH-1) OX=229533 GN=ZRA1 PE=2 SV=1 && - && PF00005:ABC transporter|PF06422:CDR ABC transporter|PF14510:ABC-transporter N-terminal|PF01061:ABC-2 type transporter|PF19055:ABC-2 type transporter	ABC2_membrane
FPSE_03454	1072.80143155474	934.330279761938	897.028013899287	252.868391924454	180.182507533284	229.645258173733	968.053241738656	220.89871921049	2.13315427448952	6.11552401658759e-39	1.13105947103866e-37	-	Contig1213	40713	41921	+	1149	protein_coding	- && sp|D4AV38|LIP4_ARTBC Probable secreted lipase ARB_00047 OS=Arthroderma benhamiae (strain ATCC MYA-4681 / CBS 112371) OX=663331 GN=ARB_00047 PE=1 SV=1 && - && PF12697:Alpha/beta hydrolase family	-
FPSE_05606	1194.4802328653	722.856348128578	830.878462036323	124.860326302946	142.80422139606	117.818002019568	916.071681010066	128.494183239525	2.83295331912918	6.20436018633482e-39	1.14581689796904e-37	-	Contig1252	305927	310301	+	3849	protein_coding	- && sp|F2SQT8|MDR5_TRIRC ABC multidrug transporter MDR5 OS=Trichophyton rubrum (strain ATCC MYA-4607 / CBS 118892) OX=559305 GN=MDR5 PE=1 SV=3 && - && PF00664:ABC transporter transmembrane region|PF00005:ABC transporter	ABC_membrane
FPSE_02975	2565.3947276309	1968.63005447783	2268.12781614982	6655.37016587888	6875.68781406266	7176.91354675129	2267.38419941952	6902.65717556428	-1.60626679018658	7.1407526107044e-39	1.31682961899584e-37	-	Contig1205	135090	136489	-	1218	protein_coding	- && sp|Q9SUV2|PT432_ARATH Probable sugar phosphate/phosphate translocator At4g32390 OS=Arabidopsis thaliana OX=3702 GN=At4g32390 PE=3 SV=1 && - && PF03151:Triose-phosphate Transporter family	-
FPSE_00703	429.931764630634	334.513310038225	225.509835896469	17.8371894718494	12.4594287124079	15.975322307738	329.984970188442	15.4239801639985	4.42336755517273	7.44487074327299e-39	1.37091667800182e-37	-	Contig0343	95158	95661	+	504	protein_coding	- && - && - && PF17107:N-terminal domain on NACHT_NTPase and P-loop NTPases	-
FPSE_01892	205.839972217025	374.885606077321	375.849726494115	2350.31202452604	3637.19476642986	2781.70299683488	318.858434929487	2923.06992926359	-3.19619058738286	7.56275980613811e-39	1.39060383140731e-37	-	Contig1192	135416	136744	+	1329	protein_coding	- && sp|P50537|MAE1_SCHPO Malic acid transport protein OS=Schizosaccharomyces pombe (strain 972 / ATCC 24843) OX=284812 GN=mae1 PE=1 SV=1 && - && PF03595:Voltage-dependent anion channel	C4dic_mal_tran
FPSE_09174	4565.99701917864	4718.7524108553	3859.72612461023	1499.37316207487	1228.69135456208	1349.91473500386	4381.49185154806	1359.3264172136	1.68881484009339	7.81746119914064e-39	1.43535385408569e-37	-	Contig1588	189000	193374	-	4002	protein_coding	- && - && - && PF10433:Mono-functional DNA-alkylating methyl methanesulfonate N-term	-
FPSE_11315	3016.62028249089	1962.8625836151	2180.93067960318	405.009125654934	498.377148496318	452.301312837831	2386.80451523639	451.895862329694	2.40053524359302	7.92822740599495e-39	1.4535848481411e-37	-	Contig2155	93272	96110	+	2712	protein_coding	- && - && - && PF00884:Sulfatase	Sulfatase
novel.339	570.876376148695	359.505683776713	377.85425836875	41.9698575808222	30.6693629843888	20.9676105289061	436.078772764719	31.2022770313724	3.80822904573135	8.03597855289891e-39	1.47121116021209e-37	-	Contig1247	190492	192871	-	2220	-	- && - && -	-
FPSE_08068	4747.50123113356	4266.96719327494	3642.2344162123	1203.48566613008	984.294868280227	1223.11061418619	4218.9009468736	1136.96371619883	1.89190064268104	9.41890052021197e-39	1.72190549337035e-37	-	Contig1564	122336	126306	-	3813	protein_coding	- && - && - && -	-
FPSE_10521	1668.01356796555	1711.97760108643	1622.66855251726	244.474420408289	387.200707677908	235.636004039135	1667.55324052308	289.103710708444	2.52683939409043	1.03483889800517e-38	1.88910288167543e-37	-	Contig1631	26786	29356	+	2394	protein_coding	- && - && - && PF00069:Protein kinase domain	Pkinase
FPSE_08392	584.058246290673	617.119382311898	574.298382083007	164.731691004727	180.182507533284	185.713121827454	591.825336895192	176.875773455155	1.7418135764211	1.10442288713417e-38	2.01322784994285e-37	-	Contig1570	103115	105855	+	2523	protein_coding	- && sp|Q5BA18|BGLK_EMENI Probable beta-glucosidase K OS=Emericella nidulans (strain FGSC A4 / ATCC 38163 / CBS 112.46 / NRRL 194 / M139) OX=227321 GN=bglK PE=2 SV=1 && - && PF01915:Glycosyl hydrolase family 3 C-terminal domain|PF00933:Glycosyl hydrolase family 3 N terminal domain|PF14310:Fibronectin type III-like domain	Glyco_hydro_3_C
FPSE_02917	1234.02584329123	1107.35440564378	1121.53558385844	396.61515413877	376.658114152025	428.338329376224	1154.30527759782	400.53719922234	1.52711762930835	1.25367837400916e-38	2.28201886786235e-37	-	Contig1204	61101	63547	-	2277	protein_coding	- && - && - && PF12796:Ankyrin repeats (3 copies)	-
FPSE_04057	901.437119709041	765.15113445525	818.851270788511	215.095520101714	258.77275018078	224.652969952565	828.479841650934	232.840413411686	1.82984809544126	1.26445861097167e-38	2.29833947523675e-37	-	Contig1220	365971	370957	+	4833	protein_coding	- && - && - && PF12796:Ankyrin repeats (3 copies)|PF06985:Heterokaryon incompatibility protein (HET)	-
FPSE_02135	1.01399001092131	7.68996115030402	5.01132968658819	306.379960340002	215.643958483984	296.541920337386	4.57176028260451	272.855279720457	-5.88335265677802	1.29636246082848e-38	2.35295358398796e-37	-	Contig1195	217043	218293	+	1197	protein_coding	- && - && - && -	-
FPSE_05306	105596.919737345	68921.2768095998	78481.4319557204	12781.9201262394	17422.1150103194	11865.6706440724	84333.2095008883	14023.2352602104	2.58826212509389	1.44523668892523e-38	2.61941396451985e-37	-	Contig1247	322557	323882	+	1326	protein_coding	- && - && - && -	-
FPSE_09766	594.198146399886	492.157513619457	417.944895861455	91.2844402382883	75.7149898677098	85.8673574040916	501.433518626933	84.2889291700299	2.57394564262467	1.61653333262887e-38	2.92569439872503e-37	-	Contig1599	11065	12997	-	1701	protein_coding	- && - && - && PF06985:Heterokaryon incompatibility protein (HET)	-
FPSE_11794	7889.85627497869	6505.7071331572	7537.03984862864	20157.0733496294	18445.7049999233	19844.3456791433	7310.86775225484	19482.374676232	-1.4140854304519	1.64373443423088e-38	2.97068067721412e-37	-	Contig2163	194854	196686	+	1584	protein_coding	- && sp|Q4WPF5|SEBA_ASPFU C2H2 finger domain transcription factor sebA OS=Neosartorya fumigata (strain ATCC MYA-4609 / Af293 / CBS 101355 / FGSC A1100) OX=330879 GN=sebA PE=4 SV=1 && - && PF00096:Zinc finger, C2H2 type	zf-C2H2
FPSE_02185	978.500360539061	636.344285187658	661.495518629642	122.761833423905	95.8417593262149	105.836510288764	758.780054785453	108.146701012961	2.81182114226115	1.66906153244499e-38	3.01215677415178e-37	-	Contig1195	330660	332419	+	1707	protein_coding	- && - && - && PF00172:Fungal Zn(2)-Cys(6) binuclear cluster domain	Zn_clus
FPSE_12008	604.338046509099	477.738836462637	400.906374927055	78.6934829640416	65.1723963418262	72.8874080290545	494.32775263293	72.2510957783074	2.7756782610457	1.92169860519792e-38	3.46315784199893e-37	-	Contig2167	184944	185398	-	333	protein_coding	- && - && - && PF07876:Stress responsive A/B Barrel Domain	-
FPSE_11483	206.853962227946	203.783970483056	185.419198403763	9.443217955685	11.5010111191458	4.99228822116812	198.685710371589	8.64550576533297	4.51886508392892	1.96288291139818e-38	3.53235278473061e-37	-	Contig2156	424270	425350	+	981	protein_coding	- && - && - && -	-
FPSE_03969	883.185299512458	597.894479436137	429.972087109267	39.8713647017811	49.8377148496318	54.9151704328493	637.017288685954	48.2080833280874	3.72242950795516	2.00152416910434e-38	3.59678151750113e-37	-	Contig1220	123238	125999	-	2541	protein_coding	- && sp|Q5BFG8|BGLB_EMENI Beta-glucosidase B OS=Emericella nidulans (strain FGSC A4 / ATCC 38163 / CBS 112.46 / NRRL 194 / M139) OX=227321 GN=bglB PE=1 SV=1 && - && PF00933:Glycosyl hydrolase family 3 N terminal domain|PF07691:PA14 domain|PF01915:Glycosyl hydrolase family 3 C-terminal domain|PF14310:Fibronectin type III-like domain	Glyco_hydro_3_C
FPSE_12399	58.8114206334358	89.3957983722842	67.1518178002818	402.910632775893	398.701718797054	392.393854183814	71.7863456020006	398.002068585587	-2.46838955211128	2.2127193704689e-38	3.9706716295284e-37	-	Contig2190	1714	2697	+	984	protein_coding	- && - && - && PF10528:GLEYA domain	-
FPSE_11954	339.686653658638	316.249652306253	292.66165369675	60.8562934921922	48.8792972563696	43.9321363462794	316.199319887214	51.2225756982804	2.6287064293324	2.24251739937147e-38	4.01845161706325e-37	-	Contig2167	3529	3923	-	279	protein_coding	- && - && - && -	-
FPSE_03667	1390.18030497311	1901.34289441267	1727.90647593561	6693.14303770162	7120.08430034451	9224.75017507445	1673.14322510713	7679.32583770686	-2.19832603196454	2.26734006628507e-38	4.05719368640757e-37	-	Contig1216	241313	241801	-	489	protein_coding	- && - && - && -	-
FPSE_09480	938.95475011313	578.669576560377	729.649602367241	76.5949900850005	114.051693598196	81.8735268271571	749.091309680249	90.8400701701178	3.0413561886805	2.46830662653438e-38	4.41057498611623e-37	-	Contig1593	53003	54076	+	897	protein_coding	- && sp|A0A2Z5TTA9|HIME_ASPJA Efflux pump himE OS=Aspergillus japonicus OX=34381 GN=himE PE=3 SV=1 && - && PF04479:RTA1 like protein	RTA1
FPSE_04876	393.428124237467	293.179768855341	250.56648432941	29.3789003065755	23.9604398315537	28.9552716827751	312.391459140739	27.4315372736348	3.51140353340398	3.22677357202268e-38	5.75774568788103e-37	-	Contig1240	409	1536	-	1062	protein_coding	- && - && - && -	-
FPSE_00542	8223.45898857179	7627.4802159578	5428.27231651233	1449.00933297789	1083.97029797949	961.514711396979	7093.07050701397	1164.83144745145	2.60650213649862	3.84297615958711e-38	6.84763220334867e-37	-	Contig0340	70016	70881	-	762	protein_coding	- && - && - && PF17784:Sulfotransferase domain	-
FPSE_04787	2526.8631072159	2536.72593445654	2572.81666109438	5402.56991709134	5204.20753141347	5735.14070847793	2545.46856758894	5447.30605232758	-1.09758993346159	3.84910217755255e-38	6.84891509654681e-37	-	Contig1237	194315	195684	-	1290	protein_coding	- && - && - && -	-
FPSE_01981	1510.84511627275	1430.33277395655	1299.93892070098	415.50159005014	296.151036318004	312.517242645124	1413.70560364342	341.389956337756	2.05117035077548	4.76615898126971e-38	8.46878935956606e-37	-	Contig1193	197899	200818	-	2625	protein_coding	- && - && - && PF00004:ATPase family associated with various cellular activities (AAA)	AAA
FPSE_09206	1038.32577118342	988.160007814066	1170.646614787	3058.55337120242	3857.63081288015	3387.76678688468	1065.71079792816	3434.65032365575	-1.68856491764609	5.05266414875201e-38	8.96529441184023e-37	-	Contig1588	317990	321398	-	3210	protein_coding	- && sp|Q9Y8G7|C505_FUSOX Bifunctional cytochrome P450/NADPH--P450 reductase OS=Fusarium oxysporum OX=5507 GN=CYP505 PE=1 SV=1 && - && PF00175:Oxidoreductase NAD-binding domain|PF00067:Cytochrome P450|PF00667:FAD binding domain|PF00258:Flavodoxin	p450
FPSE_06540	1140.73876228647	1069.86584503605	1093.47213761354	2589.54021273673	2856.08442792121	3047.29273020102	1101.35891497869	2830.97245695298	-1.3621982517907	6.80801089228513e-38	1.20630335656448e-36	-	Contig1355	84574	86334	-	1644	protein_coding	- && sp|Q8TGG8|GDA1_ASPFU Probable guanosine-diphosphatase OS=Neosartorya fumigata (strain ATCC MYA-4609 / Af293 / CBS 101355 / FGSC A1100) OX=330879 GN=gda1 PE=3 SV=2 && - && PF01150:GDA1/CD39 (nucleoside phosphatase) family	-
FPSE_05508	1875.88152020442	1537.03098491702	1803.07642123443	594.922731208155	600.927830975368	598.07612889594	1738.66297545195	597.975563693154	1.53962492646243	6.94099773124181e-38	1.2281494449316e-36	-	Contig1252	30719	35607	+	4842	protein_coding	- && sp|Q4WDD4|ATRF_ASPFU ABC multidrug transporter atrF OS=Neosartorya fumigata (strain ATCC MYA-4609 / Af293 / CBS 101355 / FGSC A1100) OX=330879 GN=atrF PE=1 SV=1 && - && PF01061:ABC-2 type transporter|PF19055:ABC-2 type transporter|PF14510:ABC-transporter N-terminal|PF06422:CDR ABC transporter|PF00005:ABC transporter	ABC2_membrane
FPSE_09029	1549.37673668776	1153.4941725456	1243.81202821119	317.921671174728	227.144969603129	241.626749904537	1315.56097914818	262.231130227465	2.32782522640421	7.42271443697757e-38	1.31155326641658e-36	-	Contig1585	24553	25548	-	996	protein_coding	- && sp|A0A097ZPD4|ANDH_EMEVA Oxidoreductase andH OS=Emericella variicolor OX=1549217 GN=andH PE=1 SV=1 && - && PF00106:short chain dehydrogenase	adh_short
FPSE_02346	268.707352894146	308.559691155949	244.552888705504	1.04924643952056	1.9168351865243	7.98766115386899	273.9399775852	3.65124759330461	6.22315992978908	7.51599014797431e-38	1.32618494686193e-36	-	Contig1197	99558	100058	+	387	protein_coding	- && - && - && PF08881:CVNH domain	-
FPSE_11421	1867.76960011705	1966.70756419025	1484.35585316742	457.471447630962	421.703741035346	508.214940914914	1772.94433915824	462.463376527074	1.93898505069788	7.64002635465968e-38	1.34549275207483e-36	-	Contig2156	259625	261306	-	1287	protein_coding	- && - && - && -	-
FPSE_06274	7830.03086433433	5878.01405426363	6249.12811917548	1727.05963945083	1202.814079544	1417.80985481175	6652.39101259115	1449.22785793553	2.19882170169719	7.64665546999669e-38	1.34549275207483e-36	-	Contig1273	499515	501642	-	1899	protein_coding	- && - && - && -	-
FPSE_02764	4316.555476492	3330.71442322543	2719.14748794275	679.91169280932	745.648887557952	611.056078270978	3455.47246255339	678.872219546083	2.34753325896056	8.04521280590388e-38	1.41365882160882e-36	-	Contig1202	333524	334691	-	1056	protein_coding	- && - && - && -	-
FPSE_07579	9926.96220691959	6613.36658926146	6371.40456352823	1429.073650627	956.500758075625	1138.24171442633	7637.24445323642	1174.60537437632	2.70109193407693	8.94877499741704e-38	1.5702497291174e-36	-	Contig1376	12755	14691	+	1758	protein_coding	- && sp|A0A067XMP2|PTAK_PESFW Oxydoreductase ptaK OS=Pestalotiopsis fici (strain W106-1 / CGMCC3.15140) OX=1229662 GN=ptaK PE=2 SV=2 && - && PF07731:Multicopper oxidase|PF07732:Multicopper oxidase|PF00394:Multicopper oxidase	-
FPSE_11575	751.366598092688	1335.16950472154	652.475125193783	81.8412222826033	73.7981546811855	81.8735268271571	913.003742669335	79.1709679303153	3.52825189006168	1.13260448578441e-37	1.98464263214421e-36	-	Contig2159	6572	7219	-	597	protein_coding	- && - && - && -	-
FPSE_09305	1325.28494427415	1220.78133261076	1187.6851357214	2778.40457185043	2860.87651588752	2888.53796476787	1244.5838042021	2842.60635083527	-1.1916831033925	1.17834440413314e-37	2.06193995248105e-36	-	Contig1590	179947	181988	-	1890	protein_coding	- && sp|A2BGU8|SEPT3_DANRE Neuronal-specific septin-3 OS=Danio rerio OX=7955 GN=septin3 PE=2 SV=1 && - && PF00735:Septin	GTP_CDC
FPSE_03168	2378.82056562138	2327.17449311075	2580.83478859292	5504.34682172483	5597.15874465095	5224.92885227455	2428.94328244169	5442.14480621678	-1.16390355305251	1.20355833649811e-37	2.10315594001305e-36	-	Contig1207	60692	64159	-	3393	protein_coding	- && - && - && -	-
FPSE_04464	2130.39301294566	3338.40438437573	2770.26305074595	369.334746711235	293.275783538218	489.244245674476	2746.35348268912	383.951591974643	2.83883924510994	1.21008410709849e-37	2.11164677036236e-36	-	Contig1229	300	2411	-	2058	protein_coding	- && sp|Q9URY8|SULH2_SCHPO Probable sulfate permease C869.05c OS=Schizosaccharomyces pombe (strain 972 / ATCC 24843) OX=284812 GN=SPAC869.05c PE=1 SV=1 && - && PF00916:Sulfate permease family|PF01740:STAS domain	Sulfate_transp
FPSE_11476	11060.6030391296	11193.6996994113	7454.8540417686	2047.0798035046	1733.77742621123	2211.58368197748	9903.05226010316	1997.48030389777	2.30976672663549	1.47394999564921e-37	2.56856568017605e-36	NPS19	Contig2156	393601	404435	-	9291	protein_coding	- && sp|Q4WD46|FSQE_ASPFU ABC-type transporter fsqE OS=Neosartorya fumigata (strain ATCC MYA-4609 / Af293 / CBS 101355 / FGSC A1100) OX=330879 GN=fsqE PE=2 SV=1 && - && PF00005:ABC transporter|PF00664:ABC transporter transmembrane region|PF00550:Phosphopantetheine attachment site|PF00975:Thioesterase domain|PF00501:AMP-binding enzyme|PF00668:Condensation domain|PF08881:CVNH domain	AMP-binding
FPSE_11978	1317.17302418678	1806.17962517766	2293.18446458276	9325.70235445869	9667.5582632353	9575.20880820045	1805.51237131573	9522.82314196481	-2.39895124925024	1.53701787620369e-37	2.67479113648689e-36	-	Contig2167	79448	81217	+	1668	protein_coding	- && sp|A0A3S9NM20|ASTB_TALWO Cytochrome P450 monooxygenase astB OS=Talaromyces wortmannii OX=28567 GN=astB PE=1 SV=1 && - && PF00067:Cytochrome P450	p450
FPSE_04407	560.736476039482	638.266775475234	832.882993910958	3033.37145665392	2638.5236342507	2863.57652366203	677.295415141891	2845.15720485555	-2.07060645021695	1.80198685870844e-37	3.13160103058672e-36	-	Contig1227	14168	16620	+	2346	protein_coding	- && sp|P78810|VTC4_SCHPO Vacuolar transporter chaperone 4 OS=Schizosaccharomyces pombe (strain 972 / ATCC 24843) OX=284812 GN=vtc4 PE=1 SV=2 && - && PF02656:Domain of unknown function (DUF202)|PF09359:VTC domain	DUF202
FPSE_07395	2151.68680317501	1464.93759913292	1395.15418474615	309.527699658564	328.737234488917	317.509530866292	1670.59286235136	318.591488337924	2.39032384557775	2.03296320865892e-37	3.52816587541094e-36	-	Contig1366	2647	3576	-	930	protein_coding	- && - && - && -	-
FPSE_01450	647.939616978715	959.322653500426	813.839941101923	3269.45190554605	3035.30851786123	3504.58633126002	807.034070527021	3269.78225155577	-2.01814570804424	3.18504794846832e-37	5.52002359222231e-36	-	Contig1163	83484	86540	+	3057	protein_coding	- && - && - && -	-
FPSE_03036	150.070521616353	182.63657731972	148.335358723011	635.843342349456	567.383215211192	597.077671251707	160.347485886361	600.101409604119	-1.90264178730788	3.38055481650593e-37	5.85085368446907e-36	-	Contig1205	314120	314952	+	606	protein_coding	- && - && - && PF13489:Methyltransferase domain	-
FPSE_02322	966.332480408005	1403.41790993048	1179.66700822286	4573.6652298701	5846.34731889911	6183.44819073883	1183.13913285378	5534.48691316935	-2.22569608887706	3.45671373094377e-37	5.97450290004457e-36	-	Contig1197	40814	41434	-	570	protein_coding	- && - && - && PF12973:ChrR Cupin-like domain	-
FPSE_08445	1050.49365131447	899.72545458557	735.663197991147	186.765866234659	127.469539903866	136.788697260006	895.294101297064	150.34136779951	2.57590482267663	3.73922255094249e-37	6.45397963186518e-36	-	Contig1573	9545	11879	+	2166	protein_coding	- && sp|G4N2A1|TRF1_MAGO7 Pyriculol/pyriculariol biosynthesis cluster transcription factor 1 OS=Magnaporthe oryzae (strain 70-15 / ATCC MYA-4617 / FGSC 8958) OX=242507 GN=TRF1 PE=3 SV=2 && - && PF04082:Fungal specific transcription factor domain|PF00172:Fungal Zn(2)-Cys(6) binuclear cluster domain	Fungal_trans
FPSE_10273	2820.92021038307	2600.16811394655	2346.30455926059	919.139881020006	769.609327389506	885.631930435224	2589.13096119674	858.127046281579	1.59356149104439	3.90001838713398e-37	6.72235822402726e-36	-	Contig1618	77720	78798	-	999	protein_coding	- && sp|O06350|LIPF_MYCTU Carboxylesterase LipF OS=Mycobacterium tuberculosis (strain ATCC 25618 / H37Rv) OX=83332 GN=lipF PE=1 SV=3 && - && PF07859:alpha/beta hydrolase fold	Abhydrolase_3
FPSE_08387	152.098501638196	199.938989907904	212.480378711339	747.063464938635	729.355788472496	799.764573031132	188.172623419147	758.727942147421	-2.01087978877279	3.98845817409449e-37	6.86545877820694e-36	-	Contig1570	87838	90368	+	2226	protein_coding	- && - && - && PF00172:Fungal Zn(2)-Cys(6) binuclear cluster domain|PF04082:Fungal specific transcription factor domain	Zn_clus
FPSE_10441	936.926770091287	691.135258383574	682.543103313312	165.780937444248	166.764661227614	158.754765433146	770.201710596058	163.766788035003	2.23336560409516	4.39320554671544e-37	7.55190245201329e-36	-	Contig1627	39147	40046	-	843	protein_coding	- && - && - && PF00010:Helix-loop-helix DNA-binding domain	HLH
FPSE_08573	747.310638049003	793.98848876889	817.849004851193	1819.39332612864	1777.86463550129	1842.15435361104	786.382710556362	1813.13743841365	-1.20505566989101	4.48768060676726e-37	7.7038517082838e-36	-	Contig1574	290594	292393	-	1800	protein_coding	- && sp|P36062|AVT3_YEAST Vacuolar amino acid transporter 3 OS=Saccharomyces cerevisiae (strain ATCC 204508 / S288c) OX=559292 GN=AVT3 PE=1 SV=1 && - && PF01490:Transmembrane amino acid transporter protein	Aa_trans
FPSE_05160	919.688939905625	1000.65619468331	1030.32938356253	2567.5060375068	2828.2903177166	2421.25978726654	983.558172717156	2605.68538082998	-1.40559225170875	5.13678697438067e-37	8.80621842739225e-36	-	Contig1245	128508	130347	+	1788	protein_coding	- && sp|Q05927|5NTD_BOVIN 5'-nucleotidase OS=Bos taurus OX=9913 GN=NT5E PE=1 SV=2 && - && PF02872:5'-nucleotidase, C-terminal domain|PF00149:Calcineurin-like phosphoesterase	Metallophos
FPSE_11470	1544.30678663315	1668.72156961597	1792.05149592394	4179.14856861037	4374.21789564845	4887.45016852359	1668.35995072435	4480.27221092747	-1.42515821375828	5.76976260137153e-37	9.87798951307783e-36	-	Contig2156	379803	385130	+	5175	protein_coding	- && sp|Q9QXL1|KI21B_MOUSE Kinesin-like protein KIF21B OS=Mus musculus OX=10090 GN=Kif21b PE=1 SV=2 && - && PF00225:Kinesin motor domain	Kinesin
FPSE_01161	1486.50935601064	1399.57292935533	1436.24708817618	3336.60367767537	3079.39572715129	3425.70817736556	1440.77645784738	3280.56919406407	-1.18709937355007	7.30567503169829e-37	1.24906338699846e-35	-	Contig0354	147268	149094	-	1557	protein_coding	- && sp|O94639|ZRT1_SCHPO Zinc-regulated transporter 1 OS=Schizosaccharomyces pombe (strain 972 / ATCC 24843) OX=284812 GN=zrt1 PE=1 SV=1 && - && PF02535:ZIP Zinc transporter	-
FPSE_12016	183.532191976756	288.373543136401	296.670717446021	1244.40627727138	1429.95904914713	1358.90085380196	256.192150853059	1344.42206007349	-2.39119686221678	7.36384951560067e-37	1.25731279667311e-35	-	Contig2167	215454	217481	+	1731	protein_coding	- && sp|O93800|AKT1_ALTAL Acyl-CoA ligase AKT1 OS=Alternaria alternata OX=5599 GN=AKT1 PE=4 SV=1 && - && PF00501:AMP-binding enzyme|PF13193:AMP-binding enzyme C-terminal domain	AMP-binding
FPSE_12349	1106.26310191515	1704.28763993613	1666.76825375923	6904.04157204525	6735.75884544639	8140.42517343673	1492.4396652035	7260.07519697612	-2.28218999734053	7.85352220171627e-37	1.33911538053221e-35	-	Contig2187	32786	33688	-	795	protein_coding	- && - && - && PF11937:Protein of unknown function (DUF3455)	-
FPSE_10513	1371.92848477653	1531.26351405429	1480.34678941815	3509.72934019626	3554.77085340931	3246.98425904774	1461.17959608299	3437.16148421777	-1.2339647453904	8.24017461876635e-37	1.40315554092945e-35	-	Contig1630	3439	4457	-	909	protein_coding	- && sp|P24021|NUS1_ASPOR Nuclease S1 OS=Aspergillus oryzae (strain ATCC 42149 / RIB 40) OX=510516 GN=nucS PE=1 SV=2 && - && PF02265:S1/P1 Nuclease	-
FPSE_06559	115.594861245029	179.752841888356	201.455453400845	2842.40860466118	1285.23799256454	2232.55129250638	165.601052178077	2120.06596324404	-3.67787408214293	8.84420436606864e-37	1.50398959884193e-35	-	Contig1355	146334	147564	+	1068	protein_coding	- && sp|K7ND00|FTRA_EPIFE High affinity iron permease ftrA OS=Epichloe festucae (strain E2368) OX=696363 GN=ftrA PE=2 SV=1 && - && PF03239:Iron permease FTR1 family	-
FPSE_02899	1537.2088565567	1041.98973586619	787.781026731664	121.712586984384	69.9644843081369	104.83805264453	1122.32653971819	98.8383746456839	3.50712463076503	9.20353661734309e-37	1.56299739148954e-35	-	Contig1204	11419	12033	+	615	protein_coding	- && - && - && PF13302:Acetyltransferase (GNAT) domain	-
FPSE_10026	2496.44340688826	2320.44577710424	2470.58553548798	4957.68942673462	4951.18528679226	4937.37305073527	2429.15823982682	4948.74925475405	-1.02669445822478	9.57701173176671e-37	1.62424580494983e-35	-	Contig1609	11723	18830	+	7056	protein_coding	- && - && - && -	-
FPSE_05329	2953.75290181377	2702.06009918807	2541.74641703753	702.995114478772	773.442997762554	525.188720866886	2732.51980601312	667.208944369404	2.033868981199	9.72477098786685e-37	1.64710058349312e-35	-	Contig1247	390524	390844	+	321	protein_coding	- && sp|Q9UW02|THIO_COPCM Thioredoxin OS=Coprinus comatus OX=56187 PE=1 SV=1 && - && PF00085:Thioredoxin	-
FPSE_10495	136.888651474376	203.783970483056	150.339890597646	715.586071753019	844.365899663954	796.769200098431	163.67083751836	785.573723838468	-2.26178512116488	9.84756414365697e-37	1.66567143038705e-35	-	Contig1629	58547	60505	+	1809	protein_coding	- && - && - && -	-
FPSE_03304	1086.99729170764	989.121252957854	908.052939209781	313.724685416646	245.35490387511	273.577394520013	994.723827958425	277.552327937256	1.84266759879957	1.00131836512709e-36	1.69142698237268e-35	-	Contig1209	104323	104842	-	462	protein_coding	- && - && - && -	-
FPSE_00444	10160.1799094315	9737.41330657246	10390.490972172	4866.40498649633	4306.17024652684	4488.06711083014	10096.0280627253	4553.5474479511	1.14881203269919	1.24241564165256e-36	2.0958939765774e-35	-	Contig0338	98803	101304	-	2439	protein_coding	- && - && - && -	-
FPSE_09087	516.120915558945	545.987241671585	533.205478652984	1318.90277447734	1519.09188532051	1377.8715490424	531.771211961171	1405.28873628008	-1.4021133719616	1.32551593190922e-36	2.23310656135079e-35	-	Contig1587	29111	31239	+	2010	protein_coding	- && - && - && PF13854:Kelch motif	-
FPSE_08670	459.337474947352	628.654324037354	614.389019575712	3726.92335317701	2439.17277485217	3749.20845409726	567.460272853473	3305.10152737548	-2.54182805624139	1.47311622487788e-36	2.47847403093995e-35	-	Contig1576	180375	182024	-	1596	protein_coding	- && - && - && PF00141:Peroxidase	-
FPSE_05354	21.2937902293474	43.2560314704601	39.0883715553879	335.758860646578	499.33556608958	362.440124856805	34.5460644183985	399.178183864321	-3.52796872671506	1.54404570189514e-36	2.59436538425856e-35	-	Contig1247	440303	441940	+	1638	protein_coding	- && sp|A1CP08|MNS1B_ASPCL Probable mannosyl-oligosaccharide alpha-1,2-mannosidase 1B OS=Aspergillus clavatus (strain ATCC 1007 / CBS 513.65 / DSM 816 / NCTC 3887 / NRRL 1) OX=344612 GN=mns1B PE=3 SV=1 && - && PF01532:Glycosyl hydrolase family 47	-
FPSE_05075	2125.32306289106	1548.56592664247	1961.43443933062	518.327741123154	474.416708664764	528.184093799587	1878.44114295472	506.976181195835	1.88960957352433	1.86876771447547e-36	3.13144739344307e-35	-	Contig1244	72768	73412	-	591	protein_coding	- && - && - && PF04525:LURP-one-related	-
FPSE_06317	3193.05454439119	2919.30150168416	2070.68142649824	272.804074275344	397.743301203792	468.276635145569	2727.67915752453	379.608003541569	2.84455431714377	1.87110717249697e-36	3.13144739344307e-35	-	Contig1273	600151	600732	-	582	protein_coding	- && - && - && -	-
FPSE_11355	9185.73550893611	7695.72862116675	6171.95364200202	60.8562934921922	50.7961324428939	12.9799493750371	7684.47259070163	41.5441251033744	7.53177819719452	2.1295706849528e-36	3.55930488227798e-35	-	Contig2156	97824	98601	+	729	protein_coding	- && - && - && PF01987:Mitochondrial biogenesis AIM24	-
FPSE_05798	1516.92905633827	1121.7730828006	1091.46760573891	251.819145484933	295.192618724742	227.648342885266	1243.38991495926	258.220035698314	2.26696308117838	2.17103279802987e-36	3.62382272967594e-35	-	Contig1262	54207	56899	+	2460	protein_coding	- && - && - && PF12796:Ankyrin repeats (3 copies)	-
FPSE_09669	19150.2153462598	15201.1307038635	12986.3597498246	4353.32347757078	4010.01921020883	3979.85216991522	15779.2352666493	4114.39828589828	1.93929348156872	2.45602193169493e-36	4.09412392797935e-35	-	Contig1595	170739	171698	-	831	protein_coding	- && - && - && -	-
FPSE_04053	143.986581550825	260.497433966549	135.305901537881	1297.91784568693	1580.43061128928	1714.35177514913	179.929972351752	1530.90007737511	-3.0877325120058	2.47844085444213e-36	4.12606664716522e-35	-	Contig1220	347998	349720	-	1356	protein_coding	- && - && - && PF05730:CFEM domain	-
FPSE_08385	56.7834406115932	62.4809343462202	75.1699452988229	455.372954751921	632.555611553019	885.631930435224	64.8114400855454	657.853498913388	-3.34368489039974	2.85386330607199e-36	4.74482863840236e-35	-	Contig1570	79520	80716	-	1197	protein_coding	- && sp|F0KFI5|CNTA_ACICP Carnitine monooxygenase oxygenase subunit OS=Acinetobacter calcoaceticus (strain PHEA-2) OX=871585 GN=yeaW PE=1 SV=1 && - && PF00848:Ring hydroxylating alpha subunit (catalytic domain)	-
FPSE_00615	1001.82213079025	857.430668258898	763.726644236041	159.485458807124	216.602376077246	201.688444135192	874.326481095063	192.592093006521	2.18111429343139	2.94857356672488e-36	4.8958687440154e-35	-	Contig0340	247663	249052	+	1335	protein_coding	- && - && - && -	-
FPSE_10811	462.379444980116	413.335411828841	428.969821171949	60.8562934921922	97.7585945127392	75.8827809617554	434.894892660302	78.1658896555623	2.47198446036287	3.12870405219668e-36	5.18816120906802e-35	-	Contig1651	26837	28504	+	1668	protein_coding	- && - && - && PF06985:Heterokaryon incompatibility protein (HET)	-
FPSE_04021	1759.27266894847	1599.51191926324	1486.36038504206	455.372954751921	514.670247581774	566.125484280465	1615.04832441792	512.056228871387	1.65675516141546	3.37229728098274e-36	5.58478879121181e-35	-	Contig1220	258056	264016	-	5196	protein_coding	- && sp|Q9J4Z4|V246_FOWPN Putative ankyrin repeat protein FPV246 OS=Fowlpox virus (strain NVSL) OX=928301 GN=FPV246 PE=4 SV=1 && - && PF13857:Ankyrin repeats (many copies)|PF12796:Ankyrin repeats (3 copies)	-
FPSE_00396	3621.97231901091	2691.48640260641	2793.31516730426	889.760980713431	795.486602407584	866.661235194785	3035.59129630719	850.636272771933	1.83546612925294	4.00576483046462e-36	6.62520034427627e-35	-	Contig0337	173145	175544	+	2400	protein_coding	- && - && - && -	-
FPSE_09339	3258.96389510108	3702.71629387139	3100.00854412346	9007.78068328397	8804.0240117061	10346.0181095488	3353.89624436531	9385.94093484629	-1.4845963478412	4.01651857932937e-36	6.63432514752592e-35	-	Contig1591	35741	36724	-	984	protein_coding	- && - && - && -	-
FPSE_02470	307.238973309156	263.381169397913	243.550622768186	44.0683504598633	35.4614509506995	36.9429328366441	271.390255158418	38.824244749069	2.80784294178868	4.04697858384628e-36	6.67593381233705e-35	-	Contig1198	209246	211277	+	1740	protein_coding	- && - && - && PF06985:Heterokaryon incompatibility protein (HET)	-
FPSE_04935	221.049822380845	220.125137927453	229.518899645739	32.5266396251372	33.5446157641752	26.9583563943078	223.564619984679	31.0098705945401	2.84955632867301	4.28988113483951e-36	7.06742576037474e-35	-	Contig1241	122684	123703	-	1020	protein_coding	- && - && - && PF01504:Phosphatidylinositol-4-phosphate 5-Kinase	PIP5K
FPSE_08061	201.78401217334	166.295409875324	207.469049024751	12.5909572742467	7.66734074609719	11.9814917308035	191.849490357805	10.7465965837158	4.16499025702573	4.46511167122065e-36	7.34655841073953e-35	-	Contig1564	103504	105126	+	1377	protein_coding	- && sp|Q4WMJ9|GLII_ASPFU Probable aminotransferase gliI OS=Neosartorya fumigata (strain ATCC MYA-4609 / Af293 / CBS 101355 / FGSC A1100) OX=330879 GN=gliI PE=2 SV=1 && - && PF00155:Aminotransferase class I and II	Aminotran_1_2
FPSE_10843	896.367169654435	831.477049376622	678.534039564041	194.110591311303	173.473584380449	211.673020577528	802.126086198366	193.08573208976	2.05510244239757	5.30115533527028e-36	8.71080894196357e-35	-	Contig1655	2879	4097	+	1167	protein_coding	- && - && - && -	-
FPSE_10984	2328.12106507532	4316.95194075192	3581.09619403592	28840.6368831015	20056.804974197	23157.2281427104	3408.72306662105	24018.2233333363	-2.81676062538027	6.0887948848094e-36	9.99209098389253e-35	-	Contig1665	3449	4378	-	654	protein_coding	- && - && - && -	-
FPSE_00418	799.024128605989	851.66319739617	829.876196099005	1805.75312241488	1863.16380130162	1810.20370899556	826.854507367055	1826.37354423735	-1.14319109840584	6.22864962481817e-36	1.02083780202874e-34	-	Contig0338	15980	18196	-	2163	protein_coding	- && sp|J9VSG5|SKT5_CRYNH Chitin synthase regulator 2 OS=Cryptococcus neoformans var. grubii serotype A (strain H99 / ATCC 208821 / CBS 10515 / FGSC 9487) OX=235443 GN=CSR2 PE=3 SV=1 && - && PF08238:Sel1 repeat	-
FPSE_00985	587.100216323436	596.933234292349	554.253063336654	1374.51283577193	1556.47017145773	1503.67721221584	579.428837984147	1478.2200731485	-1.35129016660576	7.39851939053074e-36	1.21100571264385e-34	-	Contig0348	117532	121277	+	3651	protein_coding	- && sp|O94275|MUG30_SCHPO Probable E3 ubiquitin-protein ligase mug30 OS=Schizosaccharomyces pombe (strain 972 / ATCC 24843) OX=284812 GN=mug30 PE=1 SV=1 && - && PF00632:HECT-domain (ubiquitin-transferase)	HECT
FPSE_04523	141.958601528983	105.73696581668	190.430528090351	1518.25959798624	921.039307124925	1409.82219365788	146.042031812005	1283.04036625635	-3.13567930104472	8.49600726025241e-36	1.38706077293992e-34	-	Contig1230	105614	106864	+	1059	protein_coding	- && - && - && -	-
FPSE_06854	7099.95805647099	5921.27008573409	4291.70274359413	1228.66758067857	1106.01390262452	1225.10752947466	5770.97696193307	1186.59633759258	2.28205533586227	9.64762377688479e-36	1.5730469192967e-34	-	Contig1359	30048	30758	+	711	protein_coding	- && - && - && -	-
FPSE_06075	143.986581550825	353.738212913985	338.765886813362	2847.65483685879	4102.027299162	4922.39618607176	278.830227092724	3957.35944069752	-3.82669384795691	1.02656694934936e-35	1.67166795389551e-34	-	Contig1269	31181	32807	-	1308	protein_coding	- && - && - && PF05730:CFEM domain	-
FPSE_09785	378.218274073647	278.761091698521	217.491708397928	7.34472507664389	1.9168351865243	2.99537293270087	291.490358056699	4.08564439862302	6.18117964002346	1.0692569992724e-35	1.73894954092196e-34	-	Contig1599	75918	76852	-	777	protein_coding	- && - && - && -	-
FPSE_05581	3762.91693052897	4146.81155030144	4231.56678735507	8882.92035698102	8539.50075596575	8985.12034045838	4047.09842272849	8802.51381780172	-1.12097496571342	1.1384319799198e-35	1.84907625046204e-34	-	Contig1252	222431	223237	-	696	protein_coding	- && - && - && -	-
FPSE_04469	427.903784608791	333.552064894437	218.493974335245	6.29547863712333	1.9168351865243	11.9814917308035	326.649941279491	6.73126851815037	5.60933140057903	1.19148954275675e-35	1.93277605853845e-34	-	Contig1229	12166	13476	+	1311	protein_coding	- && - && - && -	-
FPSE_11977	172.378301856622	274.916111123369	276.625398699668	1286.3761348522	1797.99140495979	1415.81293952328	241.30660389322	1500.06015977842	-2.63570955443759	1.36657441477997e-35	2.21395540420043e-34	-	Contig2167	75933	76253	+	198	protein_coding	- && - && - && -	-
FPSE_04565	1502.73319618538	1452.44141226367	1153.6080938526	401.861386336373	401.576971576841	415.358380001187	1369.59423410055	406.2655793048	1.75328221659417	1.53295947278232e-35	2.48034017377768e-34	-	Contig1232	22520	24415	-	1896	protein_coding	- && - && - && PF06985:Heterokaryon incompatibility protein (HET)	-
FPSE_07615	2737.77302948753	2187.79394726149	2216.0099874093	608.562934921922	408.285894729676	409.367634135786	2380.52565471944	475.405487929128	2.32477935646231	1.64669771585079e-35	2.66097109210633e-34	-	Contig1402	2608	4932	-	1866	protein_coding	- && - && - && -	-
FPSE_06385	469.477375056565	455.630198155513	436.98794867049	112.269369028699	114.051693598196	82.8719844713907	454.031840627523	103.064349032762	2.13925376464908	1.79117318047295e-35	2.89074815584864e-34	-	Contig1312	78578	79405	+	780	protein_coding	- && - && - && PF00583:Acetyltransferase (GNAT) family	Acetyltransf_1
FPSE_09184	234.231692522822	562.328409115981	322.72963181628	9.443217955685	7.66734074609719	2.99537293270087	373.096577818361	6.70197721149435	5.8036516190149	1.89652317236385e-35	3.05687685377578e-34	-	Contig1588	245269	247301	-	1740	protein_coding	- && sp|K3VAW3|W4933_FUSPC Acyl-CoA ligase FPSE_09184 OS=Fusarium pseudograminearum (strain CS3096) OX=1028729 GN=FPSE_09184 PE=3 SV=1 && - && PF13193:AMP-binding enzyme C-terminal domain|PF00501:AMP-binding enzyme	AMP-binding
FPSE_07124	1905.28723052113	1832.13324405993	1709.86568906389	336.808107086098	469.624620698453	281.565055673882	1815.76205454832	362.665927819478	2.32308054872701	2.00927306153658e-35	3.23449560566798e-34	-	Contig1363	147193	147920	-	681	protein_coding	- && sp|Q04432|HSP31_YEAST Glutathione-independent glyoxalase HSP31 OS=Saccharomyces cerevisiae (strain ATCC 204508 / S288c) OX=559292 GN=HSP31 PE=1 SV=1 && - && PF01965:DJ-1/PfpI family	DJ-1_PfpI
FPSE_02715	1994.51835148221	2267.5772941959	2541.74641703753	6107.66352444915	6617.87348147514	6216.39729299854	2267.94735423855	6313.97809964094	-1.47716050816693	2.04492550871386e-35	3.28771082105277e-34	-	Contig1202	173167	175705	-	2475	protein_coding	- && sp|P38041|BOB1_YEAST Protein BOB1 OS=Saccharomyces cerevisiae (strain ATCC 204508 / S288c) OX=559292 GN=BOI1 PE=1 SV=1 && - && PF00169:PH domain|PF07647:SAM domain (Sterile alpha motif)	SAM_2
FPSE_06359	376.190294051805	291.257278567765	234.530229332327	24.1326681089728	8.62575833935934	16.9737799519716	300.659267317299	16.5774021334346	4.19189737278352	2.19152201812538e-35	3.51893440400892e-34	-	Contig1312	12217	13569	-	1353	protein_coding	- && - && - && PF11951:Fungal specific transcription factor domain	-
FPSE_08441	693.569167470174	998.733704395734	771.744771734582	6128.64845323956	3676.4898877536	5360.71909189032	821.349214533497	5055.28581096116	-2.62146816969692	2.19893776460186e-35	3.52637247338493e-34	-	Contig1573	3083	3864	-	543	protein_coding	- && - && - && -	-
FPSE_10360	167.308351802016	211.473931633361	186.421464341081	7.34472507664389	4.79208796631075	6.98920350963536	188.401249258819	6.37533885086333	4.89278479163918	2.35377029504541e-35	3.76990086825921e-34	-	Contig1623	2768	4159	+	1392	protein_coding	- && - && - && -	-
FPSE_02490	480.631265176699	430.637824417025	480.085383975149	98.6291653149322	76.6734074609719	113.824171442633	463.784824522958	96.3755814061791	2.26822258134544	2.45413081230136e-35	3.92567970467752e-34	-	Contig1198	253762	255200	-	1209	protein_coding	- && sp|A0A1C3YKE0|FGM3_GIBZE Aminotransferase-like protein FGM3 OS=Gibberella zeae (strain ATCC MYA-4620 / CBS 123657 / FGSC 9075 / NRRL 31084 / PH-1) OX=229533 GN=FGM3 PE=2 SV=1 && - && PF00266:Aminotransferase class-V	Aminotran_5
FPSE_03851	2136.47695301119	2214.70881128756	2064.66783087434	5324.92568056682	5743.79663642006	6720.61840333652	2138.6178650577	5929.7802401078	-1.47129960140201	2.88256667908216e-35	4.60520015854878e-34	-	Contig1219	8885	9444	-	501	protein_coding	- && - && - && -	-
FPSE_09611	75.0352608081767	56.7134634834921	82.1858068600464	379.827211106441	544.381192972901	464.282804568635	71.3115103839051	462.830402882659	-2.70039314630797	3.16955636142468e-35	5.05731858222786e-34	-	Contig1594	83867	85840	-	1554	protein_coding	- && sp|Q10449|MU157_SCHPO Meiotically up-regulated gene 157 protein OS=Schizosaccharomyces pombe (strain 972 / ATCC 24843) OX=284812 GN=mug157 PE=1 SV=1 && - && PF06824:Metal-independent alpha-mannosidase (GH125)	-
FPSE_06464	351.854533789693	383.536812371413	355.804407747762	1055.54191815768	1251.69337680037	1380.8669219751	363.731917969623	1229.36740564438	-1.75697228762534	3.51859844526865e-35	5.60718537146019e-34	-	Contig1331	122224	123764	-	1386	protein_coding	- && sp|D4AIS3|OPSB_ARTBC Probable aspartic-type endopeptidase OPSB OS=Arthroderma benhamiae (strain ATCC MYA-4681 / CBS 112371) OX=663331 GN=OPSB PE=3 SV=1 && - && PF00026:Eukaryotic aspartyl protease	Asp
FPSE_03882	4005.26054313916	4130.47038285705	3804.60149805776	7893.48096451314	8449.40950219911	8359.0873975239	3980.11080801799	8233.99262141205	-1.04878547711742	4.01678416337228e-35	6.39304504595018e-34	-	Contig1219	94002	94954	+	861	protein_coding	- && - && - && PF02100:Ornithine decarboxylase antizyme	-
FPSE_06451	524.232835646315	334.513310038225	413.935832112185	34.6251325041783	21.0851870517673	8.98611879810261	424.227325932242	21.5654794513494	4.30420813219846	4.65704833111222e-35	7.402778583044e-34	-	Contig1331	84741	85851	-	1044	protein_coding	- && sp|A0A2Z5TTA9|HIME_ASPJA Efflux pump himE OS=Aspergillus japonicus OX=34381 GN=himE PE=3 SV=1 && - && PF04479:RTA1 like protein	RTA1
FPSE_08342	49.685510535144	66.3259149213722	77.1744771734582	429.141793763907	651.723963418262	452.301312837831	64.3953008766581	511.055690006667	-2.98836779340828	5.92740716828885e-35	9.41031596679843e-34	-	Contig1569	18715	19528	-	762	protein_coding	- && - && - && PF14021:Tuberculosis necrotizing toxin	-
FPSE_02549	1489.5513260434	1392.84421334882	1424.21989692836	3108.91720029941	2943.30042890806	3162.11535928789	1435.53847877353	3071.44432949845	-1.09735482306719	6.5804584038045e-35	1.04340209659323e-33	-	Contig1199	127907	131752	-	3546	protein_coding	- && sp|O74360|RGA4_SCHPO Probable Rho-type GTPase-activating protein 4 OS=Schizosaccharomyces pombe (strain 972 / ATCC 24843) OX=284812 GN=rga4 PE=1 SV=2 && - && PF00620:RhoGAP domain|PF00412:LIM domain	RhoGAP
FPSE_06460	938.95475011313	1443.79020596958	1386.13379131029	5830.66246441572	5191.74810270106	6514.93612862439	1256.29291579767	5845.78223191373	-2.21806086194285	7.03668268621543e-35	1.11434666189579e-33	-	Contig1331	113676	116273	+	2598	protein_coding	- && sp|Q12333|FRE7_YEAST Ferric/cupric reductase transmembrane component 7 OS=Saccharomyces cerevisiae (strain ATCC 204508 / S288c) OX=559292 GN=FRE7 PE=1 SV=2 && - && PF08022:FAD-binding domain|PF08030:Ferric reductase NAD binding domain|PF01794:Ferric reductase like transmembrane component	Ferric_reduct
FPSE_07481	1145.80871234108	965.090124363154	885.000822651475	186.765866234659	209.893452924411	265.589733366144	998.633219785235	220.749684175071	2.176953995527	7.28743203569167e-35	1.15261518676876e-33	-	Contig1368	54561	55624	-	975	protein_coding	- && sp|Q9HY42|Y3578_PSEAE Uncharacterized isomerase PA3578 OS=Pseudomonas aeruginosa (strain ATCC 15692 / DSM 22644 / CIP 104116 / JCM 14847 / LMG 12228 / 1C / PRS 101 / PAO1) OX=208964 GN=PA3578 PE=3 SV=1 && - && PF02567:Phenazine biosynthesis-like protein	-
FPSE_11385	2261.19772435451	1392.84421334882	1735.92460343415	129.057312061028	177.307254753498	61.9043739424847	1796.65551371249	122.75631358567	3.87059767466137	7.93380086962818e-35	1.25328333188678e-33	-	Contig2156	171841	172498	-	609	protein_coding	- && - && - && -	-
FPSE_06700	348.812563756929	408.529186109901	295.668451508703	1710.2716964185	1336.9925426007	1922.03096514973	351.003400458511	1656.43173472298	-2.2380305226068	1.23021278162267e-34	1.94091727651029e-33	-	Contig1357	93095	93457	+	363	protein_coding	- && - && - && -	-
FPSE_10826	899.409139687199	875.69432599087	783.771962982393	281.198045791509	280.81635482581	309.521869712423	852.958476220154	290.512090109914	1.55386878033128	1.27458065109732e-34	2.00841570506864e-33	-	Contig1654	3103	3921	-	819	protein_coding	- && sp|P50941|FABG_RICPR 3-oxoacyl-[acyl-carrier-protein] reductase FabG OS=Rickettsia prowazekii (strain Madrid E) OX=272947 GN=fabG PE=1 SV=2 && - && PF00106:short chain dehydrogenase	adh_short
FPSE_04169	2398.08637582889	2017.65355681102	1713.87475281316	583.381020373429	506.044489242415	567.123941924698	2043.20489515102	552.183150513514	1.88788405237682	1.29314036209799e-34	2.03512984439993e-33	-	Contig1222	158324	160759	+	2436	protein_coding	- && sp|P97321|SEPR_MOUSE Prolyl endopeptidase FAP OS=Mus musculus OX=10090 GN=Fap PE=1 SV=1 && - && PF00930:Dipeptidyl peptidase IV (DPP IV) N-terminal region|PF01847:VHL beta domain|PF00326:Prolyl oligopeptidase family	-
FPSE_10330	899.409139687199	712.28265154691	687.5544329999	193.061344871782	140.887386209536	152.764019567744	766.415408078003	162.237583549687	2.24154227919671	1.32212376412456e-34	2.07816203073127e-33	-	Contig1620	50687	51309	-	576	protein_coding	- && - && - && PF08719:NADAR domain	-
FPSE_08458	1550.39072669868	1432.25526424412	1342.03409006832	546.657394990209	559.715874465095	494.236533895644	1441.56002700371	533.536601116983	1.43386626027139	1.40532402056715e-34	2.20620198470449e-33	-	Contig1573	40647	42812	+	2052	protein_coding	- && sp|Q12556|AMO1_ASPNG Copper amine oxidase 1 OS=Aspergillus niger OX=5061 GN=AO-I PE=1 SV=2 && - && PF01179:Copper amine oxidase, enzyme domain	-
FPSE_10520	968.360460429848	1152.53292740181	962.175299824933	104.924643952056	161.014155668041	67.8951198078864	1027.6895625522	111.277973142661	3.20552836863406	1.43558639487102e-34	2.25092129166101e-33	-	Contig1631	25043	25747	-	285	protein_coding	- && - && - && -	-
FPSE_10060	551.610565941191	372.963115789745	370.838396807526	1.04924643952056	3.8336703730486	0.998457644233623	431.804026179487	1.96045815226759	7.7550557278028	1.47213258757808e-34	2.30537055031233e-33	-	Contig1610	42170	43129	+	960	protein_coding	- && - && - && PF12146:Serine aminopeptidase, S33	-
FPSE_10363	1282.69736381545	1359.20063331624	1264.85961289486	197.258330629864	246.313321468372	336.480226106731	1302.25253667552	260.017292734989	2.32368207089067	1.55312676355079e-34	2.42920530462037e-33	-	Contig1623	10226	12100	+	1821	protein_coding	- && - && - && -	-
FPSE_06701	5.06995005460653	2.88373543136401	11.024925310494	192.012098432262	173.473584380449	191.703867692856	6.32620359882152	185.729850168522	-4.88365044819962	1.62519300417164e-34	2.53878793709625e-33	-	Contig1357	93988	94518	-	531	protein_coding	- && - && - && -	-
FPSE_02161	221.049822380845	231.660079652909	183.414666529128	23.0834216694522	18.2099342719808	24.9614411058406	212.041522854294	22.0849323490912	3.26634148581078	1.72162629057645e-34	2.6861186545952e-33	-	Contig1195	282369	284247	+	1725	protein_coding	- && sp|P48537|CRTI_CERNC Phytoene desaturase OS=Cercospora nicotianae OX=29003 GN=PDH1 PE=3 SV=1 && - && PF01593:Flavin containing amine oxidoreductase	Amino_oxidase
FPSE_03755	646.925626967794	578.669576560377	480.085383975149	115.417108347261	105.425935258836	74.8843233175218	568.56019583444	98.5757889745397	2.52878215025936	1.8114219634256e-34	2.82274352455584e-33	-	Contig1218	24907	28782	+	3057	protein_coding	- && - && - && PF00931:NB-ARC domain	NB-ARC
FPSE_08050	31364.7390178178	21092.6021901401	24072.423282495	474.259390663291	961.292846041936	416.356837645421	25509.9214968177	617.303024783549	5.36874153654767	1.83935779070136e-34	2.86275477277586e-33	-	Contig1564	78567	83972	-	4152	protein_coding	- && sp|Q9HGE0|FUM6_GIBM7 Bifunctional cytochrome P450/NADPH--P450 reductase OS=Gibberella moniliformis (strain M3125 / FGSC 7600) OX=334819 GN=FUM6 PE=2 SV=1 && - && PF00067:Cytochrome P450|PF00175:Oxidoreductase NAD-binding domain|PF00258:Flavodoxin|PF00667:FAD binding domain	p450
FPSE_10302	11709.5566461192	12832.6226695698	11512.0265560304	5445.58902111168	5162.9955749032	4729.69386073467	12018.0686239065	5112.75948558318	1.23308504235876	1.85858155059555e-34	2.88912511220797e-33	-	Contig1619	23969	24700	+	681	protein_coding	- && sp|P34227|PRX1_YEAST Peroxiredoxin PRX1, mitochondrial OS=Saccharomyces cerevisiae (strain ATCC 204508 / S288c) OX=559292 GN=PRX1 PE=1 SV=1 && - && PF10417:C-terminal domain of 1-Cys peroxiredoxin|PF00578:AhpC/TSA family	-
FPSE_00561	180.490221943993	270.109885404429	268.607271201127	20.9849287904111	12.4594287124079	15.975322307738	239.735792849849	16.473226603519	3.87051135585772	2.02884512001047e-34	3.1499312286045e-33	-	Contig0340	124725	125572	+	747	protein_coding	- && - && - && -	-
FPSE_05576	1640.63583767067	1550.48841693005	1473.33092785693	299.035235263358	146.637891769109	241.626749904537	1554.81839415255	229.099958979001	2.76431656924649	2.06156662403578e-34	3.19681610280408e-33	-	Contig1252	205614	206757	+	1047	protein_coding	- && - && - && PF01370:NAD dependent epimerase/dehydratase family	Epimerase
FPSE_00599	1180.2843727124	1026.60981356559	1005.27273512959	389.270429062126	371.866026185714	381.410820097244	1070.72230713586	380.849091781695	1.49138695048097	2.11002095437687e-34	3.26795299156487e-33	-	Contig0340	213295	217353	+	3732	protein_coding	- && sp|Q96JX3|SRAC1_HUMAN Protein SERAC1 OS=Homo sapiens OX=9606 GN=SERAC1 PE=2 SV=1 && - && PF12796:Ankyrin repeats (3 copies)	-
FPSE_11195	430.945754641555	407.567940966113	443.001544294396	124.860326302946	113.093276004934	102.841137356063	427.171746634021	113.598246554648	1.9117595455821	2.31997687374558e-34	3.58874078308703e-33	-	Contig1690	22481	24085	+	1605	protein_coding	- && - && - && PF06985:Heterokaryon incompatibility protein (HET)	-
FPSE_00937	3052.10993287313	2758.77356267157	3000.78421632901	1336.73996394919	1319.74102592198	1234.09364827276	2937.22257062457	1296.85821271464	1.17940249488071	2.36974842390154e-34	3.66126131492788e-33	-	Contig0347	61793	65462	+	3558	protein_coding	- && sp|Q86IH1|HBX4_DICDI Homeobox protein 4 OS=Dictyostelium discoideum OX=44689 GN=hbx4 PE=3 SV=1 && - && PF03221:Tc5 transposase DNA-binding domain|PF05920:Homeobox KN domain	Coprinus_mating
FPSE_05015	175.420271889386	180.714087032144	168.380677469363	14.6894501532878	7.66734074609719	12.9799493750371	174.838345463631	11.7789134248074	3.90152531930056	2.46356397212441e-34	3.80157027562049e-33	-	Contig1242	138316	139060	+	690	protein_coding	- && sp|P23198|CBX3_MOUSE Chromobox protein homolog 3 OS=Mus musculus OX=10090 GN=Cbx3 PE=1 SV=2 && - && PF00385:Chromo (CHRromatin Organisation MOdifier) domain	Chromo
FPSE_00727	185.560171998599	189.365293326236	167.378411532046	14.6894501532878	18.2099342719808	11.9814917308035	180.767958952294	14.960292052024	3.59166160281882	2.53813244025574e-34	3.91187346540145e-33	-	Contig0343	151767	152615	+	849	protein_coding	- && - && - && -	-
FPSE_05519	3961.65897266954	3175.95395507556	2910.58028197042	954.814259963705	706.353766234204	811.746064761936	3349.39773657184	824.304696986615	2.023016683417	2.96240442612451e-34	4.55808953832735e-33	-	Contig1252	55671	57064	+	1341	protein_coding	- && sp|I1RF63|AURS_GIBZE Aurofusarin biosynthesis cluster protein S OS=Gibberella zeae (strain ATCC MYA-4620 / CBS 123657 / FGSC 9075 / NRRL 31084 / PH-1) OX=229533 GN=aurS PE=1 SV=1 && - && PF02469:Fasciclin domain	-
FPSE_11961	13293.4090431783	11142.7537067905	6276.18929948305	1354.57715342104	1033.1741655366	1356.90393851349	10237.4506831506	1248.21841915704	3.03600996647374	2.96461108183893e-34	4.55808953832735e-33	PKS7	Contig2167	29686	37101	+	7044	protein_coding	- && sp|W7MT31|FUB1_GIBM7 Reducing polyketide synthase FUB1 OS=Gibberella moniliformis (strain M3125 / FGSC 7600) OX=334819 GN=FUB1 PE=1 SV=1 && - && PF00698:Acyl transferase domain|PF02801:Beta-ketoacyl synthase, C-terminal domain|PF00109:Beta-ketoacyl synthase, N-terminal domain|PF16197:Ketoacyl-synthetase C-terminal extension|PF08659:KR domain|PF14765:Polyketide synthase dehydratase	ketoacyl-synt
FPSE_08810	24.3357602621114	23.0698834509121	33.0747759314821	457.471447630962	249.188574248159	326.495649664395	26.8268065481685	344.385223847839	-3.68250447616886	3.46365685315373e-34	5.31891741486116e-33	-	Contig1579	46450	48391	+	1830	protein_coding	- && sp|J9VY90|LAC1_CRYNH Laccase-1 OS=Cryptococcus neoformans var. grubii serotype A (strain H99 / ATCC 208821 / CBS 10515 / FGSC 9487) OX=235443 GN=LAC1 PE=1 SV=1 && - && PF00394:Multicopper oxidase|PF07732:Multicopper oxidase|PF07731:Multicopper oxidase	-
FPSE_02358	3679.76974963342	5457.94992642828	3727.4270208843	679.91169280932	659.391304164359	946.537846733475	4288.38223231533	761.946947902385	2.492718159641	3.76676731456567e-34	5.77738197436228e-33	-	Contig1197	125470	125862	+	393	protein_coding	- && - && - && -	-
FPSE_06310	890.283229588907	663.259149213722	716.620145182112	196.209084190344	195.517189025478	193.700782981323	756.720841328247	195.142352065715	1.954985270168	3.92839504462196e-34	6.01799719713611e-33	-	Contig1273	583123	584805	-	1638	protein_coding	- && sp|Q4U3U4|QAY_NEUTR Quinate permease OS=Neurospora terricola OX=88718 GN=qa-y PE=3 SV=1 && - && PF00083:Sugar (and other) transporter	Sugar_tr
FPSE_10920	623.603856716603	516.188642214157	527.191883029078	121.712586984384	75.7149898677098	109.830340865699	555.66146065328	102.419305905931	2.4424271914427	3.94062593041292e-34	6.02944322613542e-33	-	Contig1659	14826	15986	-	1161	protein_coding	- && sp|A0MTQ2|BAPA_SPHMI Beta-peptidyl aminopeptidase BapA OS=Sphingosinicella microcystinivorans OX=335406 PE=1 SV=1 && - && PF03576:Peptidase family S58	-
FPSE_09218	223.077802402687	214.357667064725	220.498506209881	838.347905176924	662.266556944145	733.866368511713	219.311325225764	744.826943544261	-1.76355734279555	4.11011530346849e-34	6.28118827257446e-33	-	Contig1589	8029	10002	-	1803	protein_coding	- && sp|Q9UPW0|FOXJ3_HUMAN Forkhead box protein J3 OS=Homo sapiens OX=9606 GN=FOXJ3 PE=1 SV=2 && - && PF00250:Forkhead domain	Fork_head
FPSE_04024	8.11192008737045	17.302412588184	7.01586156122347	282.247292231029	181.140925126546	250.61286870264	10.8100647455927	238.000362020072	-4.45101120573801	4.30215066596718e-34	6.56674057676364e-33	-	Contig1220	268604	269904	+	999	protein_coding	- && - && - && -	-
FPSE_04315	2897.98345121309	2569.40826934533	2697.09763732177	1063.93588967384	1019.75631923093	863.665862262084	2721.49645262673	982.452690388951	1.47000768543083	4.60504320974027e-34	7.02061280676287e-33	-	Contig1224	142113	145824	+	1707	protein_coding	- && sp|P38830|NDT80_YEAST Meiosis-specific transcription factor NDT80 OS=Saccharomyces cerevisiae (strain ATCC 204508 / S288c) OX=559292 GN=NDT80 PE=1 SV=4 && - && PF05224:NDT80 / PhoG like DNA-binding family	NDT80_PhoG
FPSE_06806	2363.61071545757	1816.75332175932	1745.94726280733	377.7287182274	202.226112178314	303.531123847022	1975.43710000807	294.495318084245	2.74696794464849	4.61507502717977e-34	7.02745018261304e-33	-	Contig1358	87911	89913	+	1845	protein_coding	- && sp|G7ISB0|FAAH_MEDTR Fatty acid amide hydrolase OS=Medicago truncatula OX=3880 GN=FAAH PE=1 SV=1 && - && PF01425:Amidase	Amidase
FPSE_04711	6425.65469920832	9504.79198177577	6431.54051976729	32423.8134740642	30072.2688237865	37233.4840111161	7453.99573358379	33243.1887696556	-2.15693471924902	4.88631225338545e-34	7.43153540673953e-33	-	Contig1235	107236	110662	-	3172	protein_coding	- && - && - && -	-
FPSE_00192	996.752180735644	1320.75082756472	1324.99556913392	3705.9384243866	3873.92391196561	3982.84754284792	1214.16619247809	3854.23662640004	-1.66633628867115	5.43562891906373e-34	8.257072275254e-33	-	Contig0334	51570	53261	-	1632	protein_coding	- && - && - && PF04218:CENP-B N-terminal DNA-binding domain|PF03221:Tc5 transposase DNA-binding domain	CENP-B_N
FPSE_06052	3347.18102605123	3039.45714465766	2817.36954979988	1120.59519740795	920.080889531663	869.656608127486	3068.00257350293	970.110898355701	1.66141669675203	5.53265123724726e-34	8.39439024247731e-33	-	Contig1268	36124	37441	+	1200	protein_coding	- && sp|G5EAZ3|CHIB1_EMENI Endochitinase B OS=Emericella nidulans (strain FGSC A4 / ATCC 38163 / CBS 112.46 / NRRL 194 / M139) OX=227321 GN=chiB PE=1 SV=1 && - && PF00704:Glycosyl hydrolases family 18	-
FPSE_04094	88.2171309501537	133.613074986532	101.228859669082	482.653362179455	541.505940193114	584.09772187667	107.686355201922	536.085674749747	-2.31404483025015	5.6264322228109e-34	8.526467683109e-33	-	Contig1221	41624	42301	+	678	protein_coding	- && - && - && -	-
FPSE_07033	290.001143123494	347.009496907469	168.380677469363	7.34472507664389	5.7505055595729	4.99228822116812	268.463772500109	6.02917295246163	5.48136000029547	6.53754380583396e-34	9.89535752402753e-33	-	Contig1362	37703	39421	-	1647	protein_coding	- && sp|Q6MYX6|QUTD_ASPFU Probable quinate permease OS=Neosartorya fumigata (strain ATCC MYA-4609 / Af293 / CBS 101355 / FGSC A1100) OX=330879 GN=qutD PE=3 SV=1 && - && PF00083:Sugar (and other) transporter	Sugar_tr
FPSE_00355	186.57416200952	220.125137927453	242.548356830869	781.688597442814	691.01908474201	757.82935197332	216.41588558928	743.512344719381	-1.77999743360373	6.90779093595676e-34	1.04432939579518e-32	-	Contig0337	69551	71093	-	1350	protein_coding	- && - && - && -	-
FPSE_08328	1738.99286873004	1569.71331980581	1398.16098255811	540.361916353086	476.333543851288	544.159416107325	1568.95572369798	520.284958770566	1.59277642060293	7.91966850233648e-34	1.195879383267e-32	-	Contig1568	88444	89208	+	765	protein_coding	- && - && - && -	-
FPSE_06422	4834.70437207279	5271.4683685334	5251.87351154443	10434.7558410319	10990.1745419371	11575.1194696004	5119.34875071687	11000.0166175231	-1.10346337487133	8.77139728377493e-34	1.32291466890648e-32	-	Contig1331	3742	5993	+	2088	protein_coding	- && sp|W7L9F0|FUM16_GIBM7 Acyl-CoA synthetase FUM16 OS=Gibberella moniliformis (strain M3125 / FGSC 7600) OX=334819 GN=FUM16 PE=3 SV=1 && - && PF00501:AMP-binding enzyme	AMP-binding
FPSE_09216	259.581442795854	369.118135214593	334.756823064091	52.4623219760278	42.1703741035346	47.9259669232139	321.152133691513	47.5195543342587	2.75924253759326	9.15456278697946e-34	1.37906249641192e-32	-	Contig1588	361624	363680	-	1524	protein_coding	- && - && - && -	-
FPSE_07470	271.74932292691	345.087006619893	466.053660852702	1868.70790878611	1692.56546970096	2059.81812005397	360.963330133168	1873.69716618034	-2.37587785888647	1.04600813263469e-33	1.57385712973265e-32	-	Contig1368	30462	32223	-	1515	protein_coding	- && sp|O94491|YC7A_SCHPO Uncharacterized transporter C417.10 OS=Schizosaccharomyces pombe (strain 972 / ATCC 24843) OX=284812 GN=SPCC417.10 PE=3 SV=1 && - && PF07690:Major Facilitator Superfamily	MFS_1
FPSE_01025	360.980443887985	328.745839175497	451.019671792937	1644.16917072871	1337.95096019396	1383.8622949078	380.248651618806	1455.32747527682	-1.93646792030376	1.06819655276608e-33	1.60533595812496e-32	-	Contig0349	3636	4914	+	1215	protein_coding	- && - && - && PF00010:Helix-loop-helix DNA-binding domain	HLH
FPSE_10996	855.807569217583	924.717828324058	893.018950150016	2297.84970255002	2225.44565155471	1991.92300024608	891.181449230552	2171.73945145027	-1.28487645388388	1.15155941606584e-33	1.72856709030072e-32	-	Contig1665	47180	48589	+	1356	protein_coding	- && - && - && -	-
FPSE_08878	368.078373964434	236.466305371849	195.44185777694	14.6894501532878	11.5010111191458	7.98766115386899	266.662179037741	11.3927074754342	4.552637566924	1.28478427723143e-33	1.92626414298757e-32	-	Contig1582	23400	23676	+	174	protein_coding	- && - && - && -	-
FPSE_05339	605.35203652002	708.437670971758	764.728910173358	2388.08489634878	2090.30877090475	2738.76931813283	692.839539221712	2405.72099512879	-1.79571149066969	1.35947461436251e-33	2.03583733916769e-32	-	Contig1247	409211	410858	-	1503	protein_coding	- && sp|Q9US47|SSDH1_SCHPO Putative succinate-semialdehyde dehydrogenase C1002.12c [NADP(+)] OS=Schizosaccharomyces pombe (strain 972 / ATCC 24843) OX=284812 GN=SPAC1002.12c PE=3 SV=2 && - && PF00171:Aldehyde dehydrogenase family	Aldedh
FPSE_03820	684.443257371882	586.359537710681	645.459263632559	146.894501532878	90.091253766642	135.790239615773	638.754019571708	124.258664971764	2.36433121137648	1.50602782995419e-33	2.25264068213574e-32	-	Contig1218	220779	222506	+	1578	protein_coding	- && sp|B8NM75|USTT_ASPFN Efflux pump ustT OS=Aspergillus flavus (strain ATCC 200026 / FGSC A1120 / NRRL 3357 / JCM 12722 / SRRC 167) OX=332952 GN=ustT PE=3 SV=1 && - && PF07690:Major Facilitator Superfamily	MFS_1
FPSE_02225	584.058246290673	738.236270429186	535.210010527619	131.155804940069	91.0496713599042	121.811832596502	619.168175749159	114.672436298825	2.43505655573905	1.63201712538581e-33	2.43821049074443e-32	-	Contig1195	426695	428227	+	1092	protein_coding	- && sp|S0EG57|ME178_GIBF5 Methyltransferase FFUJ_09178 OS=Gibberella fujikuroi (strain CBS 195.34 / IMI 58289 / NRRL A-6831) OX=1279085 GN=FFUJ_09178 PE=2 SV=1 && - && PF13489:Methyltransferase domain	-
FPSE_02381	265.665382861382	356.621948345349	239.541559018916	23.0834216694522	35.4614509506995	31.950644615476	287.276296741882	30.1651724118759	3.24750410670619	1.70588045269135e-33	2.54555941756733e-32	-	Contig1197	193382	193980	-	474	protein_coding	- && - && - && -	-
FPSE_08550	368.078373964434	424.870353554297	453.024203667573	1200.33792681151	1287.15482775107	1457.74816058109	415.324310395435	1315.08030504789	-1.66276068220172	1.78290105885863e-33	2.65736158996235e-32	-	Contig1574	228907	231247	+	2289	protein_coding	- && sp|P28584|TRK2_YEAST Low-affinity potassium transport protein OS=Saccharomyces cerevisiae (strain ATCC 204508 / S288c) OX=559292 GN=TRK2 PE=1 SV=1 && - && PF02386:Cation transport protein	-
FPSE_05338	288.987153112572	246.078756809729	179.405602779857	17.8371894718494	20.1267694585051	19.9691528846725	238.157170900719	19.3110372716757	3.62282090108507	2.11073157976843e-33	3.14228653162001e-32	-	Contig1247	405795	408843	+	2202	protein_coding	- && sp|Q9Z580|GATA_STRCO Glutamyl-tRNA(Gln) amidotransferase subunit A OS=Streptomyces coelicolor (strain ATCC BAA-471 / A3(2) / M145) OX=100226 GN=gatA PE=3 SV=1 && - && PF01425:Amidase|PF00644:Poly(ADP-ribose) polymerase catalytic domain	Amidase
FPSE_11109	968.360460429848	760.34490873631	753.703984862864	166.830183883768	140.887386209536	93.8550185579606	827.469784676341	133.857529550422	2.62889462221246	2.17317963362313e-33	3.23145689886988e-32	-	Contig1677	21214	22663	-	1314	protein_coding	- && - && - && PF00172:Fungal Zn(2)-Cys(6) binuclear cluster domain	Zn_clus
FPSE_07980	1886.02142031363	1563.94584894308	1422.21536505373	499.441305211784	398.701718797054	445.312109328196	1624.06087810348	447.818377779011	1.85916951688403	2.2299158699426e-33	3.31193483661229e-32	-	Contig1562	159113	161767	+	2655	protein_coding	- && - && - && -	-
FPSE_05942	694.583157481095	646.917981769326	550.243999587384	146.894501532878	139.928968616274	178.723918317819	630.581712945935	155.182462822323	2.02289040017311	2.31056674813013e-33	3.42770142061599e-32	-	Contig1265	485	2308	+	1707	protein_coding	- && - && - && -	-
FPSE_03657	983.570310593667	1120.81183765681	1262.85508102022	3175.0197259892	2982.59555023181	3264.95649664395	1122.4124097569	3140.85725762165	-1.48446599288434	2.66347668495631e-33	3.94661825984929e-32	-	Contig1216	220060	221173	+	1062	protein_coding	- && sp|Q8CG76|ARK72_MOUSE Aflatoxin B1 aldehyde reductase member 2 OS=Mus musculus OX=10090 GN=Akr7a2 PE=1 SV=3 && - && PF00248:Aldo/keto reductase family	Aldo_ket_red
FPSE_01241	505.981015449732	516.188642214157	574.298382083007	1374.51283577193	1402.16493894252	1600.5276037065	532.156013248965	1459.06845947365	-1.45522520446353	2.92751919879236e-33	4.33279681419397e-32	-	Contig0356	40746	43115	-	2370	protein_coding	- && - && - && -	-
FPSE_11193	609.407996563705	553.677202821889	600.357296453266	190.962851992741	147.596309362371	166.742426587015	587.81416527962	168.433862647376	1.80483569494333	3.34637759453954e-33	4.94693789325805e-32	-	Contig1690	17771	18162	+	342	protein_coding	- && sp|P54472|GCH1L_BACSU GTP cyclohydrolase 1 type 2 homolog OS=Bacillus subtilis (strain 168) OX=224308 GN=yqfO PE=3 SV=2 && - && -	-
FPSE_00518	6379.01115870594	4704.33373369848	5224.81233123685	30116.5205535585	19465.4613191543	25894.999003199	5436.05240788042	25158.9936253039	-2.21045538887478	3.50656607022318e-33	5.17770227781555e-32	-	Contig0340	16177	17720	+	1401	protein_coding	- && sp|Q9C0V1|AMT1_SCHPO Ammonium transporter 1 OS=Schizosaccharomyces pombe (strain 972 / ATCC 24843) OX=284812 GN=amt1 PE=3 SV=1 && - && PF00909:Ammonium Transporter Family	Ammonium_transp
FPSE_10253	425.875804586949	348.931987195045	302.684313069927	44.0683504598633	43.1287916967967	20.9676105289061	359.16403495064	36.0549175618554	3.31687713023084	3.51152212200248e-33	5.17898414012216e-32	-	Contig1618	27293	28488	+	1149	protein_coding	- && sp|O74916|YJ75_SCHPO Peptidase M20 domain-containing protein C757.05c OS=Schizosaccharomyces pombe (strain 972 / ATCC 24843) OX=284812 GN=SPCC757.05c PE=3 SV=1 && - && PF07687:Peptidase dimerisation domain|PF01546:Peptidase family M20/M25/M40	M20_dimer
FPSE_00492	1517.9430463492	1631.23300900824	1281.89813382926	439.634258159113	460.040444765832	361.441667212572	1477.0247297289	420.372123379172	1.81293918588205	3.69329448306338e-33	5.4407381169686e-32	-	Contig0339	144951	146282	+	1065	protein_coding	- && sp|Q01284|2NPD_NEUCR Nitronate monooxygenase OS=Neurospora crassa (strain ATCC 24698 / 74-OR23-1A / CBS 708.71 / DSM 1257 / FGSC 987) OX=367110 GN=ncd-2 PE=1 SV=1 && - && PF03060:Nitronate monooxygenase	NPD
FPSE_01870	376.190294051805	402.761715247173	392.888247428514	103.875397512535	113.093276004934	110.828798509932	390.613418909164	109.265824009134	1.83720840121464	3.79063185914549e-33	5.57764402131407e-32	-	Contig1192	89909	90988	+	1080	protein_coding	- && sp|O31020|Y3137_VIBCH Putative carboxypeptidase VC_A0337 OS=Vibrio cholerae serotype O1 (strain ATCC 39315 / El Tor Inaba N16961) OX=243277 GN=VC_A0337 PE=3 SV=2 && - && PF02016:LD-carboxypeptidase N-terminal domain|PF17676:LD-carboxypeptidase C-terminal domain	-
FPSE_08160	586.086226312515	972.780085513458	549.241733650066	41.9698575808222	82.4239130205448	51.9197975001484	702.702681825347	58.7711893671718	3.57647073187997	3.89294082423276e-33	5.72153913018618e-32	-	Contig1565	216893	217501	-	609	protein_coding	- && - && - && -	-
FPSE_01432	640.841686902266	571.940860553861	667.509114253547	1507.76713359104	1564.13751220383	1522.64790745628	626.763887236558	1531.51751775038	-1.28937035189675	4.09915295165747e-33	6.01763253123389e-32	-	Contig1163	10484	13108	+	2625	protein_coding	- && sp|Q5U458|DJC11_MOUSE DnaJ homolog subfamily C member 11 OS=Mus musculus OX=10090 GN=Dnajc11 PE=1 SV=2 && - && PF00226:DnaJ domain|PF11875:Domain of unknown function (DUF3395)	DnaJ
FPSE_10595	1372.94247478745	1264.03736408122	1442.26068380008	2962.02269876653	3097.60566142327	3199.05829212453	1359.74684088958	3086.22888410477	-1.18270413922313	4.60440246499974e-33	6.75152486447705e-32	-	Contig1634	5610	13983	-	6921	protein_coding	- && sp|B2KWH4|ABC1_AJECA ABC transporter 1 OS=Ajellomyces capsulatus OX=5037 GN=ABC1 PE=2 SV=1 && - && PF00005:ABC transporter|PF00664:ABC transporter transmembrane region|PF03105:SPX domain|PF00939:Sodium:sulfate symporter transmembrane region	ABC_membrane
FPSE_01526	378.218274073647	489.273778188093	455.028735542208	1327.2967459935	1537.30181959249	1648.45357062971	440.840262601316	1504.3507120719	-1.77055223157955	4.86139542919492e-33	7.12011776791566e-32	-	Contig1190	45765	46127	-	363	protein_coding	- && - && - && -	-
novel.123	296.085083189021	251.846227672457	164.371613720093	9.443217955685	3.8336703730486	9.98457644233624	237.434308193857	7.75382159035661	4.94711551764575	5.55835504785996e-33	8.13150116643624e-32	-	Contig1192	105210	106680	+	1471	-	- && - && -	-
FPSE_03842	706.751037612151	683.44529723327	542.225872088842	161.583951686166	176.348837160235	151.765561923511	644.140735644754	163.232783589971	1.9800004900614	5.60801155004063e-33	8.19468262139155e-32	-	Contig1218	276065	279488	+	3003	protein_coding	- && - && - && PF06985:Heterokaryon incompatibility protein (HET)	-
FPSE_09346	929.828840014838	1427.44903852518	1009.28179887886	4896.83313324243	4707.74721810368	6043.66412054612	1122.18655913963	5216.08149063074	-2.21642638176391	6.39264358937864e-33	9.33046101772328e-32	-	Contig1591	50430	53110	-	2628	protein_coding	- && sp|P29141|SUBV_BACSU Minor extracellular protease vpr OS=Bacillus subtilis (strain 168) OX=224308 GN=vpr PE=1 SV=1 && - && PF02225:PA domain|PF06280:Fn3-like domain|PF00082:Subtilase family	Peptidase_S8
FPSE_05342	9.12591009829176	16.341167444396	21.0475846836704	272.804074275344	181.140925126546	254.606699279574	15.5048874087861	236.183899560488	-3.92637873635797	6.45412799094071e-33	9.40936104916316e-32	-	Contig1247	415131	416580	+	1179	protein_coding	- && - && - && PF04199:Putative cyclase	-
FPSE_00884	226.119772435451	219.163892783665	226.512101833786	606.464442042881	616.262512467562	614.051451203678	223.931922350967	612.259468571374	-1.45132314113696	7.23052165704693e-33	1.05291355026583e-31	-	Contig0346	42405	44301	+	1842	protein_coding	- && sp|Q9Z127|LAT1_MOUSE Large neutral amino acids transporter small subunit 1 OS=Mus musculus OX=10090 GN=Slc7a5 PE=1 SV=2 && - && PF13520:Amino acid permease	-
FPSE_02552	243.357602621114	288.373543136401	270.611803075762	771.196133047608	806.029195933468	905.601083319896	267.447649611092	827.608804100324	-1.62928367488236	7.92349896466675e-33	1.15250067030268e-31	-	Contig1199	139010	141446	+	2379	protein_coding	- && - && - && PF13889:Chromosome segregation during meiosis|PF13915:Domain of unknown function (DUF4210)	-
FPSE_00830	1224.89993319294	1107.35440564378	1299.93892070098	3325.06196684064	2869.50227422688	3096.21715476847	1210.73108651256	3096.92713194533	-1.35499609566937	8.34200686758338e-33	1.21198262620887e-31	-	Contig0345	43922	45803	+	1782	protein_coding	- && - && - && -	-
FPSE_09845	197.728052129655	214.357667064725	245.555154642821	749.161957817676	707.312183827466	659.980502838425	219.2136246124	705.484881494523	-1.68608663030371	9.35683373158948e-33	1.35786628345369e-31	-	Contig1600	158949	161005	+	1698	protein_coding	- && sp|D4B387|GGT1_ARTBC Glutathione hydrolase proenzyme OS=Arthroderma benhamiae (strain ATCC MYA-4681 / CBS 112371) OX=663331 GN=ARB_02921 PE=1 SV=1 && - && PF01019:Gamma-glutamyltranspeptidase	-
FPSE_10929	466.435405023801	421.025372979145	372.842928682162	104.924643952056	104.467517665574	90.8596456252597	420.101235561703	100.08393574763	2.06956808023334	9.63570940812177e-33	1.39673687061207e-31	-	Contig1659	38085	40907	-	2640	protein_coding	- && sp|B0Y7Q8|BGLF_ASPFC Probable beta-glucosidase F OS=Neosartorya fumigata (strain CEA10 / CBS 144.89 / FGSC A1163) OX=451804 GN=bglF PE=3 SV=2 && - && PF01915:Glycosyl hydrolase family 3 C-terminal domain|PF00933:Glycosyl hydrolase family 3 N terminal domain|PF14310:Fibronectin type III-like domain	Glyco_hydro_3_C
FPSE_08617	1064.68951146737	1043.91222615377	1131.55824323161	2302.0466883081	2349.08152108553	2518.1101787572	1080.05332695092	2389.74612938361	-1.145869685632	9.74361892026942e-33	1.41076466401021e-31	-	Contig1576	20697	21830	+	1134	protein_coding	- && - && - && PF15365:Proline-rich nuclear receptor coactivator motif	-
FPSE_04220	728.044827841498	619.041872599474	634.434338322065	217.194012980755	210.851870517673	193.700782981323	660.507012921012	207.248888826584	1.67223849526265	9.85998309289546e-33	1.42598317127731e-31	-	Contig1223	60083	61470	+	1227	protein_coding	- && - && - && -	-
FPSE_02075	418.7778745105	366.234399783229	382.865588055338	101.776904633494	98.7170121060014	108.831883221465	389.292620783022	103.108599986987	1.916647964471	1.00731483794702e-32	1.45515070489747e-31	-	Contig1195	72027	72572	+	546	protein_coding	- && sp|I1RV22|BUT82_GIBZE Putative acetyltransferase FG08082 OS=Gibberella zeae (strain ATCC MYA-4620 / CBS 123657 / FGSC 9075 / NRRL 31084 / PH-1) OX=229533 GN=FG08082 PE=2 SV=1 && - && PF00583:Acetyltransferase (GNAT) family	Acetyltransf_1
FPSE_06766	215.979872326238	239.350040803213	191.432794027669	778.540858124252	679.518073622864	685.940401588499	215.587569052373	714.666444445205	-1.72807293663321	1.1176693230428e-32	1.61272809266848e-31	-	Contig1357	247928	249145	-	1218	protein_coding	- && - && - && PF10021:Uncharacterized protein conserved in bacteria (DUF2263)	-
FPSE_10487	317.378873418369	325.862103744133	368.833864932891	1274.83442401747	980.461197907179	1146.2293755802	337.358280698464	1133.84166583495	-1.74858437375783	1.14526482608647e-32	1.65066667596012e-31	-	Contig1629	36144	38025	-	1764	protein_coding	- && sp|P73821|SERA_SYNY3 D-3-phosphoglycerate dehydrogenase OS=Synechocystis sp. (strain PCC 6803 / Kazusa) OX=1111708 GN=serA PE=3 SV=1 && - && PF00389:D-isomer specific 2-hydroxyacid dehydrogenase, catalytic domain|PF02826:D-isomer specific 2-hydroxyacid dehydrogenase, NAD binding domain	2-Hacid_dh_C
FPSE_08452	1169.13048259227	1024.68732327801	866.960035779758	249.720652605892	167.723078820876	164.745511298548	1020.25928055001	194.063080908439	2.39589216840591	1.16861627118463e-32	1.68240903859523e-31	-	Contig1573	26191	27376	+	918	protein_coding	- && sp|Q8TG13|CSK2A_NEUCR Casein kinase II subunit alpha OS=Neurospora crassa (strain ATCC 24698 / 74-OR23-1A / CBS 708.71 / DSM 1257 / FGSC 987) OX=367110 GN=cka PE=2 SV=1 && - && PF00069:Protein kinase domain	Pkinase
FPSE_12137	809.164028715202	601.739460011289	679.536305501359	186.765866234659	146.637891769109	148.77018899081	696.813264742617	160.724648998193	2.11731491424728	1.2887432767921e-32	1.85324501403849e-31	-	Contig2173	33650	37936	-	4287	protein_coding	- && - && - && PF11915:Protein of unknown function (DUF3433)	-
FPSE_00028	592.170166378043	594.049498860986	596.348232703995	1340.93694970727	1375.32924633118	1508.66950043701	594.189299314341	1408.31189882515	-1.24503749243484	1.31664155868942e-32	1.89121676950525e-31	-	Contig0332	79897	82205	-	2205	protein_coding	- && - && - && -	-
FPSE_08793	371.120343997198	293.179768855341	297.672983383339	33.5758860646578	22.0436046450294	8.98611879810261	320.657698745293	21.5352031692633	3.9021853471184	1.39205657927645e-32	1.99501864285671e-31	-	Contig1579	4819	6666	+	1692	protein_coding	- && sp|Q4WI89|ATRR_ASPFU ABC-transporter-regulating transcription factor OS=Neosartorya fumigata (strain ATCC MYA-4609 / Af293 / CBS 101355 / FGSC A1100) OX=330879 GN=atrR PE=3 SV=2 && - && PF04082:Fungal specific transcription factor domain|PF00172:Fungal Zn(2)-Cys(6) binuclear cluster domain	Fungal_trans
FPSE_05852	625.631836738446	600.778214867501	604.366360202536	1428.02440418748	1378.20449911097	1323.95483625378	610.258803936161	1376.72791318408	-1.17375108305854	1.42329080587225e-32	2.0374769739656e-31	-	Contig1264	51495	53355	+	1758	protein_coding	- && sp|Q09906|TM184_SCHPO Transmembrane protein 184 homolog C30D11.06c OS=Schizosaccharomyces pombe (strain 972 / ATCC 24843) OX=284812 GN=SPAC30D11.06c PE=1 SV=1 && - && PF03619:Organic solute transporter Ostalpha	-
FPSE_07567	1417.55803526799	1392.84421334882	1352.05674944149	570.790063099182	634.472446739543	581.102348943969	1387.4863326861	595.454952927565	1.21993231551793	1.6217707172109e-32	2.31898569033238e-31	-	Contig1373	14008	14529	-	522	protein_coding	- && - && - && PF00383:Cytidine and deoxycytidylate deaminase zinc-binding region	-
FPSE_10669	183.532191976756	226.853853933969	180.407868717175	18.88643591137	19.168351865243	23.962983461607	196.931304875967	20.67259041274	3.25204269735533	1.89535888499067e-32	2.70713660811125e-31	-	Contig1641	6347	9633	+	2904	protein_coding	- && - && - && -	-
FPSE_03035	406.609994379444	300.869730005645	340.770418687997	62.9547863712333	48.8792972563696	66.8966621636528	349.416714357695	59.5769152637519	2.5537583550816	1.95058027335941e-32	2.78287178864756e-31	-	Contig1205	311235	313211	+	1854	protein_coding	- && sp|Q96ST3|SIN3A_HUMAN Paired amphipathic helix protein Sin3a OS=Homo sapiens OX=9606 GN=SIN3A PE=1 SV=2 && - && PF02671:Paired amphipathic helix repeat	PAH
FPSE_07620	155.14047167096	204.745215626844	202.457719338163	642.13882098658	702.520095861155	645.003638174921	187.447802211989	663.220851674219	-1.82240543236348	2.3652285257833e-32	3.37065019045541e-31	-	Contig1402	14540	15598	+	1059	protein_coding	- && sp|O34812|YFMJ_BACSU Putative NADP-dependent oxidoreductase YfmJ OS=Bacillus subtilis (strain 168) OX=224308 GN=yfmJ PE=2 SV=1 && - && PF00107:Zinc-binding dehydrogenase|PF16884:N-terminal domain of oxidoreductase	ADH_zinc_N
FPSE_02218	624.617846727525	575.785841129013	518.171489593219	2230.6979304207	1661.89610671657	2172.64383385236	572.858392483252	2021.74595699654	-1.81921233881226	2.86220190441479e-32	4.07429617157651e-31	-	Contig1195	411346	412708	-	1164	protein_coding	- && sp|Q8J0P4|CRF1_ASPFU Probable glycosidase crf1 OS=Neosartorya fumigata (strain ATCC MYA-4609 / Af293 / CBS 101355 / FGSC A1100) OX=330879 GN=crf1 PE=1 SV=2 && - && PF00722:Glycosyl hydrolases family 16	-
FPSE_07872	373.148324019041	370.079380358381	371.840662744844	1021.96603209302	955.542340482363	1163.20315553217	371.689455707422	1046.90384270252	-1.49388336566477	2.88531295751555e-32	4.10258472040006e-31	-	Contig1560	23101	25000	+	1842	protein_coding	- && sp|Q9P7K9|YOSF_SCHPO Putative aldehyde dehydrogenase-like protein C21C3 OS=Schizosaccharomyces pombe (strain 972 / ATCC 24843) OX=284812 GN=SPBC21C3.15c PE=3 SV=1 && - && PF00171:Aldehyde dehydrogenase family	Aldedh
FPSE_07284	750.352608081767	876.655571134658	1094.47440355086	3145.64082568262	3790.5415813518	3281.93027659592	907.160860922429	3406.03756121012	-1.90871091837891	3.00499172444308e-32	4.26522341530258e-31	-	Contig1364	424133	426064	+	1932	protein_coding	- && sp|P40317|SOK1_YEAST Protein SOK1 OS=Saccharomyces cerevisiae (strain ATCC 204508 / S288c) OX=559292 GN=SOK1 PE=1 SV=2 && - && PF05794:T-complex protein 11	-
FPSE_11056	532.344755733686	424.870353554297	408.924502425597	89.1859473592472	61.3387259687776	91.8581032694934	455.379870571193	80.7942588658394	2.49696071644632	3.00642869197664e-32	4.26522341530258e-31	-	Contig1670	54508	56065	-	1446	protein_coding	- && - && - && -	-
FPSE_00339	1942.80486092522	2313.71706109772	2078.69955399678	4925.16278710949	5503.23382051126	5682.22245333355	2111.74049200658	5370.20635365143	-1.34647889343987	3.04668797977157e-32	4.31750447603199e-31	-	Contig0337	6923	8740	+	1650	protein_coding	- && - && - && PF11905:Domain of unknown function (DUF3425)	-
FPSE_10257	22.3077802402687	39.4110508953081	45.1019671792937	512.032262486031	311.485717810199	606.063790049809	35.6069327716235	476.527256782013	-3.74064260834174	3.34598351649181e-32	4.73634247714354e-31	-	Contig1618	39022	40396	-	1134	protein_coding	- && - && - && -	-
FPSE_10427	254.511492741248	355.660703201561	356.806673685079	1518.25959798624	1656.14560115699	1203.14146130152	322.326289875963	1459.18222014825	-2.1782246108333	3.4846200603556e-32	4.92708164560772e-31	-	Contig1626	113734	114893	-	999	protein_coding	- && sp|Q0GYU5|GLD1_HYPJE D/L-glyceraldehyde reductase OS=Hypocrea jecorina OX=51453 GN=gld1 PE=1 SV=1 && - && PF00248:Aldo/keto reductase family	Aldo_ket_red
FPSE_08062	436.015704696162	410.451676397477	383.867853992656	111.220122589179	85.2991658003313	106.834967932998	410.111745028765	101.118085440836	2.02210437005328	3.72327470007254e-32	5.25865854796199e-31	-	Contig1564	105409	112320	-	5841	protein_coding	- && sp|Q8GWB7|GUX6_ARATH Inositol phosphorylceramide glucuronosyltransferase 1 OS=Arabidopsis thaliana OX=3702 GN=IPUT1 PE=1 SV=1 && - && PF05729:NACHT domain|PF12796:Ankyrin repeats (3 copies)|PF13637:Ankyrin repeats (many copies)|PF01501:Glycosyl transferase family 8	Glyco_transf_8
FPSE_00286	1435.80985546457	1623.54304785794	1636.7002756397	502.589044530346	534.797017040279	617.046824136379	1565.35105965407	551.477628569002	1.50495033272107	3.8574004069539e-32	5.44202736700433e-31	-	Contig0335	205453	206449	-	948	protein_coding	- && sp|Q3T0C2|PGDH_BOVIN 15-hydroxyprostaglandin dehydrogenase [NAD(+)] OS=Bos taurus OX=9913 GN=HPGD PE=2 SV=1 && - && PF00106:short chain dehydrogenase	adh_short
FPSE_03954	522.204855624473	451.785217580361	437.990214607808	124.860326302946	136.095298243225	132.794866683072	470.660095937547	131.250163743081	1.84145464416928	4.01100200827836e-32	5.65243430955268e-31	-	Contig1220	87882	89576	-	1695	protein_coding	- && sp|Q9UKM7|MA1B1_HUMAN Endoplasmic reticulum mannosyl-oligosaccharide 1,2-alpha-mannosidase OS=Homo sapiens OX=9606 GN=MAN1B1 PE=1 SV=2 && - && PF01532:Glycosyl hydrolase family 47	-
FPSE_02726	2050.28780208288	1424.56530309382	1575.56205346333	459.569940510003	373.782861372238	418.353752933888	1683.47171954668	417.235518272043	2.01286993304383	4.34999507416001e-32	6.12334306605924e-31	-	Contig1202	215856	216535	+	543	protein_coding	- && sp|Q7SDX3|3HAO_NEUCR 3-hydroxyanthranilate 3,4-dioxygenase OS=Neurospora crassa (strain ATCC 24698 / 74-OR23-1A / CBS 708.71 / DSM 1257 / FGSC 987) OX=367110 GN=bna1 PE=3 SV=1 && - && PF06052:3-hydroxyanthranilic acid dioxygenase	-
FPSE_05826	330.560743560346	372.001870645957	362.820269308985	84.988961601165	79.5486602407584	96.8503914906615	355.127627838429	87.1293377775283	2.02782943643809	4.37641042491144e-32	6.15368964186493e-31	-	Contig1263	8926	9648	-	723	protein_coding	- && - && - && PF13419:Haloacid dehalogenase-like hydrolase	-
FPSE_06912	608.394006552784	567.134634834921	567.282520521783	1316.8042815983	1362.86981761878	1286.01344577291	580.93705396983	1321.89584832999	-1.18639458746805	4.43072934704808e-32	6.22316076471754e-31	-	Contig1360	94901	95685	+	627	protein_coding	- && sp|Q9HF51|RHO3_ASHGO GTP-binding protein RHO3 OS=Ashbya gossypii (strain ATCC 10895 / CBS 109.51 / FGSC 9923 / NRRL Y-1056) OX=284811 GN=RHO3 PE=3 SV=1 && - && PF00071:Ras family	Ras
FPSE_08373	249.441542686641	366.234399783229	205.464517150116	2379.69092483262	1721.31799749882	3362.80534577884	273.713486539995	2487.93808937009	-3.18369073564071	4.91592596877663e-32	6.89699513825372e-31	-	Contig1570	48467	51198	+	2370	protein_coding	- && sp|O23482|OPT3_ARATH Oligopeptide transporter 3 OS=Arabidopsis thaliana OX=3702 GN=OPT3 PE=2 SV=3 && - && PF03169:OPT oligopeptide transporter protein	OPT
FPSE_00309	1470.28551583589	1526.45728833535	1622.66855251726	3171.87198667064	3128.27502440766	3243.98888611504	1539.80378556283	3181.37863239778	-1.04688230820863	5.2840698068112e-32	7.40529650248795e-31	-	Contig0336	24432	27857	-	3324	protein_coding	- && sp|Q01919|KIN4_YEAST Serine/threonine-protein kinase KIN4 OS=Saccharomyces cerevisiae (strain ATCC 204508 / S288c) OX=559292 GN=KIN4 PE=1 SV=1 && - && PF00069:Protein kinase domain	Pkinase
FPSE_04694	6197.50694675102	4030.50088790309	3792.57430680994	991.537885346925	757.149898677098	892.621133944859	4673.52738048802	880.436305989627	2.40840244107792	5.51530128049917e-32	7.72081236714299e-31	-	Contig1235	65106	67330	-	2073	protein_coding	- && sp|W7L9F0|FUM16_GIBM7 Acyl-CoA synthetase FUM16 OS=Gibberella moniliformis (strain M3125 / FGSC 7600) OX=334819 GN=FUM16 PE=3 SV=1 && - && PF00501:AMP-binding enzyme	AMP-binding
FPSE_02094	309.266953330998	489.273778188093	258.584611827951	29.3789003065755	29.7109453911266	32.9491022597096	352.375114449014	30.6796493191373	3.52207257292775	5.57512443206198e-32	7.7959438664231e-31	-	Contig1195	119292	120044	+	753	protein_coding	- && - && - && PF13472:GDSL-like Lipase/Acylhydrolase family	-
FPSE_08348	31.4336903385605	23.0698834509121	71.1608815495523	557.149859385415	559.715874465095	573.1146877901	41.888151779675	563.326807213537	-3.75149825074429	5.85783379806832e-32	8.18223774947382e-31	-	Contig1569	32205	33333	+	1077	protein_coding	- && - && - && PF00856:SET domain	SET
FPSE_08717	291.015133134415	272.993620835793	290.657121822115	827.855440781718	732.231041252282	764.818555482956	284.888625264108	774.968345838985	-1.44365770964896	6.03801663667217e-32	8.4246291596916e-31	-	Contig1576	328576	329610	+	852	protein_coding	- && sp|O13899|YF38_SCHPO Uncharacterized CDP-alcohol phosphatidyltransferase class-I family protein C22A12.08c OS=Schizosaccharomyces pombe (strain 972 / ATCC 24843) OX=284812 GN=SPAC22A12.08c PE=3 SV=1 && - && PF01066:CDP-alcohol phosphatidyltransferase	CDP-OH_P_transf
FPSE_08523	5406.59473823241	5415.6551401016	6564.84188943053	14212.0430233059	14510.4423619889	15505.0487573039	5795.69725592151	14742.5113808663	-1.34694899862067	6.38132672055753e-32	8.89384248875065e-31	-	Contig1574	128699	130751	+	1821	protein_coding	- && sp|Q04585|YDR09_YEAST Uncharacterized sugar kinase YDR109C OS=Saccharomyces cerevisiae (strain ATCC 204508 / S288c) OX=559292 GN=YDR109C PE=1 SV=1 && - && PF00370:FGGY family of carbohydrate kinases, N-terminal domain|PF02782:FGGY family of carbohydrate kinases, C-terminal domain	FGGY_N
FPSE_11608	545.526625875663	564.250899403557	742.67905955237	1977.82953849625	1959.9639782211	2076.79190000594	617.485528277197	2004.86180557443	-1.6991310141233	6.46505058008357e-32	9.00062920868998e-31	-	Contig2161	7941	10535	-	2595	protein_coding	- && sp|Q2GUU0|YME2_CHAGB Mitochondrial escape protein 2 OS=Chaetomium globosum (strain ATCC 6205 / CBS 148.51 / DSM 1962 / NBRC 6347 / NRRL 1970) OX=306901 GN=YME2 PE=3 SV=1 && - && PF10443:RNA12 protein|PF00076:RNA recognition motif. (a.k.a. RRM, RBD, or RNP domain)	RRM_1
FPSE_07752	331.574733571267	495.041249050821	449.015139918302	2062.81850009741	1575.63852332297	1855.13430298607	425.21037418013	1831.19710880215	-2.1059580370146	6.82921349805228e-32	9.49717956167117e-31	-	Contig1459	3156	3974	-	768	protein_coding	- && sp|P24657|RNTR_HYPRU Ribonuclease Trv OS=Hypocrea rufa OX=5547 PE=1 SV=1 && - && PF00445:Ribonuclease T2 family	Ribonuclease_T2
FPSE_03812	459.337474947352	591.165763429622	425.963023359996	66.102525689795	100.633847292526	86.8658150483252	492.15542057899	84.534062676882	2.53907134132644	7.15374961568256e-32	9.93759362731167e-31	-	Contig1218	195721	197439	-	1719	protein_coding	- && sp|P32465|HXT1_YEAST Low-affinity glucose transporter HXT1 OS=Saccharomyces cerevisiae (strain ATCC 204508 / S288c) OX=559292 GN=HXT1 PE=1 SV=1 && - && PF00083:Sugar (and other) transporter	Sugar_tr
FPSE_08996	552.624555952112	471.971365599909	404.915438676326	96.5306724358911	101.592264885788	115.8210867311	476.503786742782	104.648008017593	2.18640417304398	7.39907745309197e-32	1.02671316816235e-30	-	Contig1584	112294	112689	+	396	protein_coding	- && - && - && -	-
FPSE_03729	14246.5596534444	17955.0980408161	16718.7981003955	40751.6824645388	47434.9619433236	45079.3641795039	16306.8185982187	44422.0028624554	-1.44579088325767	8.09942723660733e-32	1.12266568556431e-30	-	Contig1217	45730	47456	+	1626	protein_coding	- && - && - && -	-
FPSE_04196	2558.29679755446	2899.11535366462	3071.94509787856	6599.76010458429	7274.38953285971	7565.31357035817	2843.11908303254	7146.48773593406	-1.32975792325237	8.35590995652743e-32	1.15695107365296e-30	-	Contig1222	237171	238532	+	1158	protein_coding	- && sp|P48009|SPN4_SCHPO Septin homolog spn4 OS=Schizosaccharomyces pombe (strain 972 / ATCC 24843) OX=284812 GN=spn4 PE=1 SV=1 && - && PF00735:Septin	GTP_CDC
FPSE_02885	174.406281878465	176.869106456992	240.543824956233	7.34472507664389	12.4594287124079	2.99537293270087	197.27307109723	7.59984224058423	4.68804303512748	8.54094798987047e-32	1.18128024108809e-30	-	Contig1203	193903	194691	+	738	protein_coding	- && sp|P22143|CYAH_ALBVE Cyanamide hydratase OS=Albifimbria verrucaria OX=1859699 GN=CAH PE=1 SV=1 && - && -	-
FPSE_00084	52237.7233926329	42621.60967556	33368.4398511161	11465.1158446411	11370.6663264621	11217.6716329648	42742.590973103	11351.1512680227	1.91283485480146	8.86241000960963e-32	1.22440427929928e-30	-	Contig0332	249765	251244	+	1209	protein_coding	- && sp|P48466|METK_NEUCR S-adenosylmethionine synthase OS=Neurospora crassa (strain ATCC 24698 / 74-OR23-1A / CBS 708.71 / DSM 1257 / FGSC 987) OX=367110 GN=eth-1 PE=1 SV=1 && - && PF02772:S-adenosylmethionine synthetase, central domain|PF00438:S-adenosylmethionine synthetase, N-terminal domain|PF02773:S-adenosylmethionine synthetase, C-terminal domain	-
FPSE_01533	2485.28951676812	2290.64717764681	2359.33401644572	5743.57500993552	5496.52489735843	6721.61686098075	2378.42357028688	5987.23892275823	-1.33191834304941	9.76288661292848e-32	1.34734216230055e-30	-	Contig1190	68477	69061	-	585	protein_coding	- && - && - && -	-
FPSE_12065	276.819272981517	446.978991861421	370.838396807526	1618.98725618022	1623.55940298608	2081.78418822711	364.878887216821	1774.77694913113	-2.28159944212774	1.07465943225404e-31	1.48148643604205e-30	-	Contig2171	10302	14443	-	4092	protein_coding	- && sp|Q00083|APSA_EMENI Anucleate primary sterigmata protein A OS=Emericella nidulans (strain FGSC A4 / ATCC 38163 / CBS 112.46 / NRRL 194 / M139) OX=227321 GN=apsA PE=1 SV=2 && - && PF12814:Meiotic cell cortex C-terminal pleckstrin homology	-
FPSE_04246	316.364883407448	472.932610743697	405.917704613644	1469.9942617683	1445.29373063932	1672.41655409132	398.405066254929	1529.23484883298	-1.93990999300923	1.19170328910637e-31	1.64105314887919e-30	-	Contig1223	149364	151653	+	2088	protein_coding	- && sp|Q5ZLG0|AACS_CHICK Acetoacetyl-CoA synthetase OS=Gallus gallus OX=9031 GN=AACS PE=2 SV=1 && - && PF00501:AMP-binding enzyme	AMP-binding
FPSE_00887	620.561886683839	520.994867933097	474.071788351243	144.796008653837	139.928968616274	139.784070192707	538.54284765606	141.503015820939	1.92831161476556	1.35483340772866e-31	1.86366823480069e-30	-	Contig0346	53388	54977	+	1497	protein_coding	- && - && - && PF14441:OTT_1508-like deaminase	-
FPSE_02234	311.294933352841	290.296033423977	220.498506209881	36.7236253832194	28.7525277978645	17.9722375962052	274.029824328899	27.8161302590964	3.30379187018444	1.45926143647126e-31	2.00513916905145e-30	-	Contig1195	446026	448168	-	2022	protein_coding	- && - && - && PF06985:Heterokaryon incompatibility protein (HET)	-
FPSE_08808	506.995005460653	459.475178730665	434.983416795855	101.776904633494	92.0080889531663	130.797951394605	467.151200329058	108.194314993755	2.11069026632249	1.58645583451524e-31	2.17697341460015e-30	-	Contig1579	39307	40877	+	1515	protein_coding	- && - && - && PF05729:NACHT domain	NACHT
FPSE_00893	909.549039796412	891.074248291478	964.179831699568	2192.92505859796	2440.13119244543	2743.761606354	921.601039929153	2458.93928579913	-1.41597840537445	1.58775233648318e-31	2.17697341460015e-30	-	Contig0346	66543	68274	+	1680	protein_coding	- && sp|P14904|AMPL_YEAST Vacuolar aminopeptidase 1 OS=Saccharomyces cerevisiae (strain ATCC 204508 / S288c) OX=559292 GN=APE1 PE=1 SV=2 && - && PF02127:Aminopeptidase I zinc metalloprotease (M18)	Peptidase_M18
FPSE_04703	356.9244838443	706.515180684182	472.067256476608	40.9206111413016	60.3803083755154	46.9275092789803	511.83564033503	49.4094762652658	3.3707000455059	1.60404920665071e-31	2.19694047557383e-30	-	Contig1235	86117	87130	-	1014	protein_coding	- && sp|A0A166YZT6|PPZF_METRR Pyrrolopyrazine biosynthesis cluster protein F OS=Metarhizium rileyi (strain RCEF 4871) OX=1081105 GN=ppzF PE=3 SV=1 && - && -	-
FPSE_02657	3190.01257435843	3051.95333152691	2602.88463921391	854.086601769732	912.413548785566	1088.31883221465	2948.28351503308	951.606327589983	1.63132034727871	1.70519337936308e-31	2.33294761589103e-30	-	Contig1201	139021	140742	+	1722	protein_coding	- && - && - && -	-
FPSE_07848	222.063812391766	187.44280303866	179.405602779857	3.14773931856167	3.8336703730486	2.99537293270087	196.304072736761	3.32559420810371	5.87918159058148	1.77237360141352e-31	2.42224392193182e-30	-	Contig1559	126585	127037	+	453	protein_coding	- && - && - && PF13577:SnoaL-like domain	-
FPSE_08483	4101.58959417668	3104.82181443525	3565.05993903884	1137.38314044028	906.663043225993	822.729098848506	3590.49044921692	955.59176083826	1.90996217298343	1.86583372813001e-31	2.54722494630163e-30	-	Contig1573	102908	106954	-	4047	protein_coding	- && - && - && -	-
FPSE_10480	420.805854532342	466.203894737181	405.917704613644	1195.09169461391	1142.43377116848	1380.8669219751	430.975817961056	1239.4641292525	-1.52368146880609	1.87364729266871e-31	2.55513859535198e-30	-	Contig1629	16744	18296	-	1443	protein_coding	- && sp|Q4H425|EF102_EPIFF MFS-type transporter EF102 OS=Epichloe festucae (strain Fl1) OX=877507 GN=EF102 PE=2 SV=1 && - && PF07690:Major Facilitator Superfamily	MFS_1
FPSE_09617	3354.27895612768	3713.28999045305	4239.58491485361	9434.82398416883	9672.35035120161	9291.6468372381	3769.05128714478	9466.27372420285	-1.32859174926099	1.92364521454104e-31	2.6205012067764e-30	-	Contig1595	7185	11100	-	3726	protein_coding	- && - && - && -	-
FPSE_10703	143.986581550825	173.985371025628	173.392007155951	3.14773931856167	8.62575833935934	7.98766115386899	163.787986577468	6.58705293726333	4.62142954439671	1.9691018908027e-31	2.67954370081411e-30	-	Contig1644	12370	13635	+	1266	protein_coding	- && - && - && -	-
FPSE_00791	1482.45339596695	1303.44841497653	1595.60737220968	3793.02587886681	3510.68364411925	3554.5092134717	1460.50306105105	3619.40624548592	-1.30939622650918	1.98501228352755e-31	2.69829620386379e-30	-	Contig0344	130397	134141	+	3048	protein_coding	- && sp|Q01317|NUC2_NEUCR Ankyrin repeat protein nuc-2 OS=Neurospora crassa (strain ATCC 24698 / 74-OR23-1A / CBS 708.71 / DSM 1257 / FGSC 987) OX=367110 GN=nuc-2 PE=4 SV=2 && - && PF03105:SPX domain|PF12796:Ankyrin repeats (3 copies)|PF03009:Glycerophosphoryl diester phosphodiesterase family	SPX
FPSE_04205	2085.77745246513	1851.35814693569	1780.02430467613	789.033322519457	697.728007894845	756.830894329087	1905.71996802565	747.864074914463	1.34977596068861	2.12529541365458e-31	2.8858914893451e-30	-	Contig1223	17002	18854	-	1602	protein_coding	- && sp|P57681|PCYOX_ARATH Farnesylcysteine lyase OS=Arabidopsis thaliana OX=3702 GN=FLCY PE=1 SV=1 && - && PF07156:Prenylcysteine lyase|PF13450:NAD(P)-binding Rossmann-like domain	-
FPSE_05679	628.67380677121	545.025996527797	578.307445832277	195.159837750823	199.350859398527	192.702325337089	584.002416377095	195.737674162147	1.57664354140428	2.18756338108131e-31	2.96726343414551e-30	-	Contig1257	12794	14476	+	1683	protein_coding	- && - && - && -	-
FPSE_04673	477.589295143935	396.032999240657	396.897311177785	115.417108347261	109.259605631885	105.836510288764	423.506535187459	110.17107475597	1.94286125656716	2.49890330763939e-31	3.38594716625492e-30	-	Contig1235	17456	18421	+	966	protein_coding	- && sp|P95125|LIPN_MYCTU Carboxylic ester hydrolase LipN OS=Mycobacterium tuberculosis (strain ATCC 25618 / H37Rv) OX=83332 GN=lipN PE=1 SV=1 && - && PF07859:alpha/beta hydrolase fold	Abhydrolase_3
FPSE_02761	257.553462774012	258.574943678973	313.709238380421	797.427294035622	810.821283899778	787.783081300329	276.612548277802	798.677219745243	-1.53002406320526	2.60012248911527e-31	3.51933245882493e-30	-	Contig1202	322877	324289	-	1413	protein_coding	- && - && - && -	-
FPSE_07271	2065.4976522467	1716.78382680537	1800.06962342248	715.586071753019	664.18339213067	740.855572021349	1860.78370082485	706.875011968346	1.39645917405699	2.74674613106698e-31	3.71382355757604e-30	-	Contig1364	372248	373574	+	1278	protein_coding	- && sp|P33330|SERC_YEAST Phosphoserine aminotransferase OS=Saccharomyces cerevisiae (strain ATCC 204508 / S288c) OX=559292 GN=SER1 PE=1 SV=1 && - && PF00266:Aminotransferase class-V	Aminotran_5
FPSE_02055	342.728623691402	356.621948345349	319.722834004327	90.2351937987677	79.5486602407584	90.8596456252597	339.691135347026	86.8811665549286	1.96847111534202	2.75294728351179e-31	3.71823977983058e-30	-	Contig1195	6118	7020	+	903	protein_coding	- && sp|Q1JU72|DEHA_BURSP Fluoroacetate dehalogenase OS=Burkholderia sp. OX=36773 GN=fac-dex PE=1 SV=1 && - && PF00561:alpha/beta hydrolase fold	Abhydrolase_1
FPSE_04618	488.74318526407	627.693078893566	631.427540510112	1713.41943573707	2028.01162734271	1804.21296313016	582.621268222583	1848.54800873664	-1.66562964462412	3.07005298342414e-31	4.14211940862625e-30	-	Contig1233	97068	98573	+	1047	protein_coding	- && - && - && -	-
FPSE_09021	164.266381769252	147.070506999564	155.351220284234	13.6402037137672	10.5425935258836	7.98766115386899	155.562703017683	10.7234861311733	3.8635400497611	3.08014583529075e-31	4.15131570077644e-30	-	Contig1585	4831	6513	-	1644	protein_coding	- && - && - && -	-
FPSE_02160	311.294933352841	212.435176777149	198.448655588892	16.7879430323289	23.9604398315537	21.9660681731397	240.726255239627	20.9048170123408	3.52100735471614	3.13172520004123e-31	4.21634713701619e-30	-	Contig1195	279789	281808	+	1746	protein_coding	- && sp|Q8X0Z1|LCPS_GIBFU Bifunctional lycopene cyclase/phytoene synthase OS=Gibberella fujikuroi OX=5127 GN=carRA PE=2 SV=1 && - && PF00494:Squalene/phytoene synthase	-
FPSE_03804	1602.10421725566	1819.63705719069	1187.6851357214	259.163870561577	181.140925126546	308.52341206819	1536.47547005592	249.609402585438	2.62259501893982	3.13794851020314e-31	4.22024094222543e-30	-	Contig1218	152698	153307	-	417	protein_coding	- && - && - && -	-
FPSE_10193	7154.71351706074	5933.76627260334	6473.63568913463	2701.80958176543	2581.97699624823	2302.44332760274	6520.70515959957	2528.74330187213	1.36662054628385	3.83492239149208e-31	5.1479055208966e-30	-	Contig1614	100420	102793	+	2319	protein_coding	- && sp|O94323|YGK5_SCHPO Uncharacterized pyrophosphatase/phosphodiesterase C725.05c OS=Schizosaccharomyces pombe (strain 972 / ATCC 24843) OX=284812 GN=SPBC725.05c PE=3 SV=1 && - && PF01663:Type I phosphodiesterase / nucleotide pyrophosphatase	-
FPSE_05436	254.511492741248	209.551441345785	154.348954346916	14.6894501532878	7.66734074609719	6.98920350963536	206.13729614465	9.78199813634011	4.40817213128051	3.83583772336127e-31	5.1479055208966e-30	-	Contig1250	33990	36114	-	1989	protein_coding	- && sp|Q9UV10|HET6_NEUCR Heterokaryon incompatibility protein 6, OR allele OS=Neurospora crassa (strain ATCC 24698 / 74-OR23-1A / CBS 708.71 / DSM 1257 / FGSC 987) OX=367110 GN=het-6 PE=4 SV=1 && - && PF06985:Heterokaryon incompatibility protein (HET)	-
FPSE_01309	921.716919927468	968.935104938306	1018.30219231472	2029.24261403275	2120.97813388914	2050.83200125586	969.651405726832	2067.01758305925	-1.09204699434185	3.95283668870589e-31	5.29931090044603e-30	-	Contig0358	73119	75990	+	2610	protein_coding	- && - && - && PF19047:HOOK domain	-
FPSE_09922	425.875804586949	366.234399783229	407.922236488279	103.875397512535	115.96852878472	109.830340865699	400.010813619486	109.891422387651	1.86263168231142	4.24795016590719e-31	5.68893030146703e-30	-	Contig1603	59886	63805	+	3813	protein_coding	- && sp|P54302|LUXQ_VIBHA Autoinducer 2 sensor kinase/phosphatase LuxQ OS=Vibrio harveyi OX=669 GN=luxQ PE=1 SV=1 && - && PF00072:Response regulator receiver domain|PF00512:His Kinase A (phospho-acceptor) domain|PF02518:Histidine kinase-, DNA gyrase B-, and HSP90-like ATPase	HATPase_c
FPSE_04294	25952.0603395199	23516.8624427735	20738.8867749766	9616.34361820589	9391.5339963758	8667.61080959209	23402.6031857567	9225.16280805792	1.34302800960749	4.50375842236189e-31	6.02514418721254e-30	-	Contig1224	73048	73593	-	336	protein_coding	- && sp|Q4HZB8|FKBP_GIBZE FK506-binding protein 1 OS=Gibberella zeae (strain ATCC MYA-4620 / CBS 123657 / FGSC 9075 / NRRL 31084 / PH-1) OX=229533 GN=FPR1 PE=3 SV=2 && - && PF00254:FKBP-type peptidyl-prolyl cis-trans isomerase	FKBP_C
FPSE_03664	197.728052129655	208.590196201997	158.358018096187	655.779024700347	610.512006907989	618.045281780613	188.225422142613	628.112104462983	-1.7378326657833	4.61391581741921e-31	6.16600205600042e-30	-	Contig1216	235484	236573	+	1038	protein_coding	- && sp|Q5AV06|ATNL_EMENI Probable thioesterase atnL OS=Emericella nidulans (strain FGSC A4 / ATCC 38163 / CBS 112.46 / NRRL 194 / M139) OX=227321 GN=atnL PE=2 SV=1 && - && -	-
FPSE_03122	1534.16688652394	1158.30039826454	1099.48573323745	360.940775195071	310.527300216936	326.495649664395	1263.98433934198	332.654575025467	1.92624115958739	4.70908812791525e-31	6.28655821839392e-30	-	Contig1206	139141	139898	-	690	protein_coding	- && - && - && PF00583:Acetyltransferase (GNAT) family	Acetyltransf_1
FPSE_09608	129.790721397927	223.008873358817	174.394273093269	861.431326846376	817.530207052613	1002.45147481056	175.731289283338	893.804336236516	-2.34534401096878	5.35135727610646e-31	7.13645740326239e-30	-	Contig1594	76154	78937	+	2538	protein_coding	- && - && - && -	-
FPSE_03757	361.994433898906	356.621948345349	354.802141810444	103.875397512535	105.425935258836	93.8550185579606	357.8061746849	101.052117109777	1.8239687352586	5.57110221402834e-31	7.42169231856204e-30	-	Contig1218	31643	33563	+	1599	protein_coding	- && - && - && -	-
FPSE_00073	410.665954423129	394.110508953081	400.906374927055	83.9397151616444	72.8397370879234	43.9321363462794	401.894279434422	66.9038628652824	2.58816215425884	6.35005602739756e-31	8.45051048435922e-30	-	Contig0332	216180	217804	+	1575	protein_coding	- && - && - && -	-
FPSE_07566	2900.01143123494	3166.34150363768	3491.89452561465	7213.56927170382	7171.83885038066	7525.37526458882	3186.08248682909	7303.59446222443	-1.19680685481791	6.58178255634256e-31	8.74969603423965e-30	-	Contig1373	1010	6032	-	4830	protein_coding	- && - && - && -	-
FPSE_06469	613.46395660739	620.96436288705	574.298382083007	225.587984496919	206.059782551362	196.696155914024	602.908900525816	209.447974320768	1.52615579149605	7.08229044657908e-31	9.4051926276426e-30	-	Contig1331	138555	139433	-	879	protein_coding	- && sp|P58116|YHHW_ECO57 Quercetin 2,3-dioxygenase OS=Escherichia coli O157:H7 OX=83334 GN=yhhW PE=3 SV=1 && - && PF02678:Pirin	-
FPSE_08340	385.316204150096	297.024749430493	275.623132762351	59.8070470526716	48.8792972563696	44.9305939905131	319.321362114313	51.2056460998514	2.64245905690464	7.1090160045103e-31	9.43079829959591e-30	-	Contig1569	10108	10980	+	873	protein_coding	- && sp|Q4WF54|SIDH_ASPFU Mevalonyl-coenzyme A hydratase sidH OS=Neosartorya fumigata (strain ATCC MYA-4609 / Af293 / CBS 101355 / FGSC A1100) OX=330879 GN=sidH PE=2 SV=1 && - && PF00378:Enoyl-CoA hydratase/isomerase	ECH
FPSE_09482	424.861814576027	396.994244384445	468.058192727337	1058.68965747624	1139.5585183887	1088.31883221465	429.97141722927	1095.52233602653	-1.34978614567112	7.58656492042977e-31	1.00537856670423e-29	-	Contig1593	60840	64238	+	3399	protein_coding	- && - && - && -	-
FPSE_10546	12.1678801310557	28.8373543136401	18.0407868717175	223.489491617878	191.68351865243	213.669935865995	19.6820071054711	209.614315378768	-3.40566079900375	7.73422431997627e-31	1.02387552674796e-29	-	Contig1631	87035	91262	-	3930	protein_coding	- && - && - && PF12796:Ankyrin repeats (3 copies)	-
FPSE_06868	202.798002184261	205.706460770633	156.353486221552	22.0341752299317	16.2930990854565	17.9722375962052	188.285983058815	18.7665039705311	3.33118968958571	8.41478138066806e-31	1.11280652726183e-29	-	Contig1359	78476	79796	+	1209	protein_coding	- && sp|O59790|ARK1_SCHPO Serine/threonine-protein kinase ark1 OS=Schizosaccharomyces pombe (strain 972 / ATCC 24843) OX=284812 GN=ark1 PE=1 SV=2 && - && PF00069:Protein kinase domain	Pkinase
FPSE_08462	428.917774619713	367.195644927017	318.720568067009	80.7919758430828	55.5882204092047	66.8966621636528	371.61132920458	67.7589528053134	2.45830138801456	9.77589981276738e-31	1.2914585477367e-29	-	Contig1573	49564	52274	+	2658	protein_coding	- && - && - && PF15474:Meiotically up-regulated gene family	-
FPSE_07837	560.736476039482	469.087630168545	448.012873980984	82.8904687221239	123.635869530817	106.834967932998	492.612326729671	104.453768728646	2.23479164145171	1.0084316468441e-30	1.33081463894457e-29	-	Contig1559	103248	104084	+	837	protein_coding	- && sp|P33912|CPOA1_KITAU Non-heme chloroperoxidase CPO-A1 OS=Kitasatospora aureofaciens OX=1894 GN=bpoA1 PE=1 SV=3 && - && PF00561:alpha/beta hydrolase fold	Abhydrolase_1
FPSE_08548	208.881942249789	160.527939012596	233.52796339501	957.961999282267	1527.71764365987	1036.3990347145	200.979281552465	1174.02622588554	-2.54717077485829	1.11120049654335e-30	1.46491145584887e-29	-	Contig1574	222277	222615	-	270	protein_coding	- && - && - && -	-
novel.630	161.224411736488	163.41167444396	168.380677469363	588.627252571031	739.898381998379	549.151704328493	164.338921216604	625.892446299301	-1.92968267520594	1.11950667343951e-30	1.4743274475889e-29	-	Contig1604	77316	80219	-	2696	-	- && - && -	-
FPSE_07573	483.673235209463	521.956113076885	502.135234596137	157.386965928083	169.6399140074	175.728545385118	502.588194294162	167.585141773534	1.58400011185479	1.13655831562683e-30	1.49522921086981e-29	-	Contig1374	14941	16671	+	1731	protein_coding	- && - && - && -	-
FPSE_09956	591.156176367122	622.886853174626	591.336903017407	218.243259420275	226.186552009867	199.691528846725	601.793310853051	214.707113425622	1.48679959539772	1.14417460177613e-30	1.50368755496906e-29	-	Contig1604	39678	40559	-	882	protein_coding	- && - && - && PF04909:Amidohydrolase	Amidohydro_2
FPSE_02113	371.120343997198	343.164516332317	328.743227440185	1826.73805120529	1152.97636469437	1685.39650346636	347.676029256567	1555.036973122	-2.16095764339442	1.18959951221146e-30	1.56176541142041e-29	-	Contig1195	166086	168339	-	2025	protein_coding	- && sp|O94469|DUR31_SCHPO Probable urea active transporter 1 OS=Schizosaccharomyces pombe (strain 972 / ATCC 24843) OX=284812 GN=dur3-1 PE=3 SV=1 && - && PF00474:Sodium:solute symporter family	-
FPSE_03730	1917.45511065219	1686.02398220416	1319.98423944733	463.766926268085	436.080004934278	381.410820097244	1641.15444410123	427.085917099869	1.94228374512652	1.22045745451502e-30	1.60061858087483e-29	-	Contig1217	47790	48850	-	1011	protein_coding	- && sp|A0A2Z5TTA9|HIME_ASPJA Efflux pump himE OS=Aspergillus japonicus OX=34381 GN=himE PE=3 SV=1 && - && PF04479:RTA1 like protein	RTA1
FPSE_12407	240.31563258835	440.250275854905	372.842928682162	1699.7792320233	2092.22560609127	2290.46183587193	351.136279041805	2027.48889132883	-2.5291210729542	1.26017319901563e-30	1.65099630386029e-29	-	Contig2190	21031	23296	-	1554	protein_coding	- && sp|C8VPE5|SDCF_EMENI FAD-dependent monooxygenase sdcF OS=Emericella nidulans (strain FGSC A4 / ATCC 38163 / CBS 112.46 / NRRL 194 / M139) OX=227321 GN=sdcF PE=1 SV=1 && - && PF01565:FAD binding domain	FAD_binding_4
FPSE_07010	163.25239175833	147.070506999564	161.36481590814	7.34472507664389	13.4178463056701	13.9784070192707	157.229238222012	11.5803261338616	3.75419801013594	1.26976460412448e-30	1.66184377785671e-29	-	Contig1361	59709	61809	-	2055	protein_coding	- && - && - && -	-
FPSE_00720	674.303357262669	1008.34615583361	552.248531462019	77.6442365245211	73.7981546811855	114.822629086867	744.966014852767	88.7550067641911	3.06954009773107	1.31111294336782e-30	1.71418884205644e-29	-	Contig0343	136534	137010	-	477	protein_coding	- && - && - && -	-
FPSE_06751	600.282086465413	802.639695062982	887.00535452611	2730.13923563248	2958.63511040026	2551.05928101691	763.309045351502	2746.61120901655	-1.84719421700624	1.59155196542623e-30	2.07869812886442e-29	-	Contig1357	207568	211365	-	3798	protein_coding	- && - && - && -	-
FPSE_04073	219.021842359002	159.566693868808	153.346688409599	5.24623219760278	9.58417593262149	3.99383057693449	177.311741545803	6.27474623571959	4.80903397410764	1.61817196943461e-30	2.11128946248889e-29	-	Contig1220	407483	409258	+	1776	protein_coding	- && sp|Q9UV10|HET6_NEUCR Heterokaryon incompatibility protein 6, OR allele OS=Neurospora crassa (strain ATCC 24698 / 74-OR23-1A / CBS 708.71 / DSM 1257 / FGSC 987) OX=367110 GN=het-6 PE=4 SV=1 && - && PF06985:Heterokaryon incompatibility protein (HET)	-
FPSE_05970	23.32177025119	32.6823348887921	42.0951693673408	251.819145484933	215.643958483984	266.588191010377	32.6997581691076	244.683764993098	-2.90237723022716	1.6304832088129e-30	2.1251637625978e-29	-	Contig1265	66529	66915	+	387	protein_coding	- && - && - && -	-
FPSE_02190	222.063812391766	194.171519045176	161.36481590814	18.88643591137	9.58417593262149	6.98920350963536	192.533382448361	11.8199384512089	4.03761022456496	1.82918865445743e-30	2.38170514525398e-29	-	Contig1195	342085	343044	-	906	protein_coding	- && - && - && PF00561:alpha/beta hydrolase fold	Abhydrolase_1
FPSE_03407	242.343612610192	185.520312751084	179.405602779857	18.88643591137	15.3346814921944	24.9614411058406	202.423176047045	19.727519503135	3.36077443172957	1.83793487971128e-30	2.39063624138216e-29	-	Contig1212	68880	70591	-	1560	protein_coding	- && - && - && -	-
FPSE_09499	1388.15232495127	1346.70444644699	1316.97744163538	557.149859385415	440.872092900589	512.208771491849	1350.61140434455	503.410241259284	1.42463678279537	1.92950803291727e-30	2.50717305323373e-29	ABC2	Contig1593	127792	132342	-	4341	protein_coding	- && sp|I1S2J9|FGM5_GIBZE ABC transporter FGM5 OS=Gibberella zeae (strain ATCC MYA-4620 / CBS 123657 / FGSC 9075 / NRRL 31084 / PH-1) OX=229533 GN=FGM5 PE=1 SV=1 && - && PF00005:ABC transporter|PF00664:ABC transporter transmembrane region	ABC_membrane
FPSE_00778	576.960316214223	527.723583939613	497.123904909549	174.174908960412	172.515166787187	150.767104279277	533.935935021128	165.819060008959	1.68710603613438	2.04368935165126e-30	2.65281766353174e-29	-	Contig0344	88993	90890	-	1836	protein_coding	- && sp|Q9UV10|HET6_NEUCR Heterokaryon incompatibility protein 6, OR allele OS=Neurospora crassa (strain ATCC 24698 / 74-OR23-1A / CBS 708.71 / DSM 1257 / FGSC 987) OX=367110 GN=het-6 PE=4 SV=1 && - && PF06985:Heterokaryon incompatibility protein (HET)	-
FPSE_09458	660.10749710977	691.135258383574	577.30517989496	189.91360555322	193.600353838954	220.659139375631	642.849311796101	201.391032922602	1.67445307990987	2.1454500443281e-30	2.78205799504531e-29	-	Contig1593	1203	2418	-	1059	protein_coding	- && sp|Q40648|KCAB_ORYSJ Probable voltage-gated potassium channel subunit beta OS=Oryza sativa subsp. japonica OX=39947 GN=KOB1 PE=1 SV=2 && - && PF00248:Aldo/keto reductase family	Aldo_ket_red
FPSE_02448	15254.4657243001	22447.9578428812	10245.1624112609	184.667373355618	177.307254753498	399.383057693449	15982.5286594808	253.785895267522	5.97672245587548	2.21099345701413e-30	2.86119265647723e-29	-	Contig1198	145550	145979	+	327	protein_coding	- && - && - && -	-
FPSE_03447	371.120343997198	194.171519045176	270.611803075762	20.9849287904111	24.9188574248159	16.9737799519716	278.634555372712	20.9591887223995	3.73041555092806	2.23119506247856e-30	2.88438880066743e-29	-	Contig1213	28230	29456	+	1179	protein_coding	- && sp|S0DQQ0|FSR2_GIBF5 O-methyltransferase fsr2 OS=Gibberella fujikuroi (strain CBS 195.34 / IMI 58289 / NRRL A-6831) OX=1279085 GN=FSR2 PE=2 SV=1 && - && PF00891:O-methyltransferase domain	-
FPSE_00154	3574.3147884976	3061.56578296479	3180.18981910887	6956.50389402128	7142.12790498954	7085.05544348179	3272.02346352375	7061.22908083087	-1.10982849888543	2.30048468751407e-30	2.97093175393636e-29	-	Contig0333	200686	202229	+	1263	protein_coding	- && sp|G4N5Q2|CON7_MAGO7 C2H2 finger domain transcription factor CON7 OS=Magnaporthe oryzae (strain 70-15 / ATCC MYA-4617 / FGSC 8958) OX=242507 GN=CON7 PE=2 SV=2 && - && -	-
FPSE_03477	3094.69751333183	2537.68717960033	2420.4722386221	912.844402382883	806.029195933468	960.516253752746	2684.28564385142	893.129950689699	1.58773291359176	2.49234560404206e-30	3.21543039283186e-29	-	Contig1214	21495	23076	+	1485	protein_coding	- && sp|D4ANB6|CBPYB_ARTBC Carboxypeptidase Y homolog ARB_05721 OS=Arthroderma benhamiae (strain ATCC MYA-4681 / CBS 112371) OX=663331 GN=ARB_05721 PE=1 SV=1 && - && PF00450:Serine carboxypeptidase	Peptidase_S10
FPSE_03867	108.49693116858	104.775720672892	113.256050916893	377.7287182274	450.45626883321	504.22111033798	108.842900919455	444.13536579953	-2.02946410482323	2.69250323062009e-30	3.47012445866998e-29	-	Contig1219	46540	46983	-	444	protein_coding	- && - && - && -	-
FPSE_02957	2200.35832369923	2155.1116123727	1763.98804967904	601.218209845278	638.306117112591	743.85094495405	2039.81932858366	661.125090637306	1.62531542357181	2.73890287372147e-30	3.5263374499164e-29	-	Contig1205	88845	90755	-	1779	protein_coding	- && - && - && -	-
FPSE_05157	492.799145307755	451.785217580361	508.148830220043	1293.72085992884	1453.91948897868	1198.14917308035	484.24439770272	1315.26317399596	-1.44195845849866	2.97687809438944e-30	3.824956245215e-29	-	Contig1245	116269	118013	-	1473	protein_coding	- && sp|Q92253|RCO3_NEUCR Probable glucose transporter rco-3 OS=Neurospora crassa (strain ATCC 24698 / 74-OR23-1A / CBS 708.71 / DSM 1257 / FGSC 987) OX=367110 GN=rco-3 PE=3 SV=2 && - && PF00083:Sugar (and other) transporter	Sugar_tr
FPSE_04052	21486.4483314225	15200.1694587197	14761.3727248142	4972.37887688791	4642.57482176185	4875.46867679278	17149.3301716521	4830.14079181418	1.82801961118825	3.08898380930597e-30	3.96497830598757e-29	MTDH1	Contig1220	346772	347631	+	801	protein_coding	- && sp|Q8NK50|MTDH_HYPJE NADP-dependent mannitol dehydrogenase OS=Hypocrea jecorina OX=51453 GN=lxr1 PE=1 SV=1 && - && PF13561:Enoyl-(Acyl carrier protein) reductase	-
FPSE_08125	185.560171998599	202.822725339268	214.484910585975	30.4281467460961	24.9188574248159	33.9475599039432	200.955935974614	29.7648546916184	2.75754854487167	3.2778194154755e-30	4.20132027793089e-29	-	Contig1565	144082	145343	-	984	protein_coding	- && sp|Q09923|YAKC_SCHPO Aldo-keto reductase yakc [NADP(+)] OS=Schizosaccharomyces pombe (strain 972 / ATCC 24843) OX=284812 GN=yakc PE=1 SV=1 && - && PF00248:Aldo/keto reductase family	Aldo_ket_red
FPSE_01584	55.7694506006719	68.2484052089482	71.1608815495523	325.266396251372	295.192618724742	276.572767452714	65.0595791197241	299.010594142943	-2.19914834951557	3.27974248549503e-30	4.20132027793089e-29	-	Contig1190	225921	228272	-	2301	protein_coding	- && - && - && PF08167:rRNA processing/ribosome biogenesis	-
FPSE_03240	523.218845635394	477.738836462637	328.743227440185	57.7085541736305	52.7129676294182	77.8796962502226	443.233636512739	62.7670726844238	2.82039157956921	3.34655603950018e-30	4.28257762266948e-29	-	Contig1208	37961	39184	+	1224	protein_coding	- && - && - && PF15508:beta subunit of N-acylethanolamine-hydrolyzing acid amidase	-
FPSE_05905	443.113634772611	636.344285187658	663.500050504277	2267.42155580392	2047.17997920795	2148.68085039076	580.985990154848	2154.42746180088	-1.8904041068904	4.02335225239598e-30	5.14347625485415e-29	-	Contig1264	234774	237144	+	2229	protein_coding	- && - && - && PF14604:Variant SH3 domain	-
FPSE_08075	152.098501638196	158.60544872502	135.305901537881	10.4924643952056	11.5010111191458	10.9830340865699	148.669950633699	10.9921698669737	3.75628153308273	4.5477019869111e-30	5.80794722501782e-29	-	Contig1565	9610	12051	-	840	protein_coding	- && - && - && PF00400:WD domain, G-beta repeat|PF04828:Glutathione-dependent formaldehyde-activating enzyme	WD40
FPSE_07989	1848.50378990954	1945.56017102692	1766.994847491	752.309697136238	831.906470951546	846.692082310113	1853.68626947582	810.302750132632	1.19359858911542	4.63033299904285e-30	5.90752152717763e-29	-	Contig1563	258	1979	+	1722	protein_coding	- && - && - && -	-
FPSE_07641	551.610565941191	593.088253717198	648.466061444512	1480.4867261635	1397.37285097621	1408.82373601364	597.7216270343	1428.89443771779	-1.25719335368725	4.82460818072767e-30	6.14919125167393e-29	-	Contig1403	27650	29363	+	1608	protein_coding	- && sp|Q0II91|DJC21_BOVIN DnaJ homolog subfamily C member 21 OS=Bos taurus OX=9913 GN=DNAJC21 PE=2 SV=2 && - && PF12171:Zinc-finger double-stranded RNA-binding|PF00226:DnaJ domain	DnaJ
FPSE_06179	1359.76060464547	845.895726533442	1153.6080938526	208.80004146459	218.51921126377	142.779443125408	1119.75480834384	190.032898617923	2.55863472527695	5.07535218565099e-30	6.46227505929773e-29	-	Contig1273	210985	212914	+	1878	protein_coding	- && sp|H9BZ66|ABCG1_PETHY ABC transporter G family member 1 OS=Petunia hybrida OX=4102 GN=ABCG1 PE=2 SV=1 && - && PF19055:ABC-2 type transporter|PF00005:ABC transporter|PF01061:ABC-2 type transporter	ABC2_membrane
FPSE_00556	679.373307317275	827.63206880147	731.654134241876	231.883463134043	179.224089940022	227.648342885266	746.219836786874	212.918631986444	1.810748127205	5.2826735540609e-30	6.71949711409614e-29	-	Contig0340	104797	111801	-	6786	protein_coding	- && sp|Q9P2E3|ZNFX1_HUMAN NFX1-type zinc finger-containing protein 1 OS=Homo sapiens OX=9606 GN=ZNFX1 PE=2 SV=2 && - && PF17866:AAA lid domain|PF00004:ATPase family associated with various cellular activities (AAA)|PF13087:AAA domain|PF13086:AAA domain	AAA
FPSE_04852	1067.73148150014	1047.75720672892	1002.26593731764	415.50159005014	404.452224356627	460.2889739917	1039.2515418489	426.747596132822	1.28418091688178	5.72437420175939e-30	7.27403177152355e-29	-	Contig1239	31677	33423	+	1677	protein_coding	- && sp|Q8T9S7|PTEN_DICDI Phosphatidylinositol 3,4,5-trisphosphate 3-phosphatase and dual-specificity protein phosphatase PTEN OS=Dictyostelium discoideum OX=44689 GN=pteN PE=2 SV=1 && - && PF00782:Dual specificity phosphatase, catalytic domain	DSPc
FPSE_11711	2318.99515497703	3801.72454368155	3754.48820119187	13988.553531688	19676.3131896719	17470.0134011557	3291.73596661682	17044.9600408386	-2.37239309801903	5.90276739449094e-30	7.4932024169144e-29	-	Contig2162	74661	75757	+	975	protein_coding	- && - && - && PF12224:Putative amidoligase enzyme	-
FPSE_02194	1970.1825912201	3160.57403277495	2221.02131709589	342.054339283701	529.046511480706	443.315194039729	2450.59264703031	438.138681601379	2.48315030929814	5.94771227636571e-30	7.54269938231003e-29	-	Contig1195	350700	351149	-	450	protein_coding	- && - && - && PF16541:Alternaria alternata allergen 1	-
FPSE_07078	1640.63583767067	1750.42740683795	1779.02203873881	3654.52534885009	3855.71397769363	4293.36787020458	1723.36176108248	3934.53573224943	-1.19097038970265	8.44467434533452e-30	1.06985579281043e-28	-	Contig1363	29165	31098	-	1836	protein_coding	- && sp|G4N2B2|TRF2_MAGO7 Pyriculol/pyriculariol biosynthesis cluster transcription factor 1 OS=Magnaporthe oryzae (strain 70-15 / ATCC MYA-4617 / FGSC 8958) OX=242507 GN=TRF2 PE=3 SV=1 && - && PF00046:Homeodomain	Homeobox
FPSE_00719	432.973734663398	295.102259142917	281.636728386256	16.7879430323289	38.336703730486	34.9460175481768	336.570907397524	30.0235547703306	3.48013938421545	8.92318721379432e-30	1.12934923887673e-28	-	Contig0343	135289	135852	+	564	protein_coding	- && - && - && -	-
FPSE_05704	803.080088649675	1215.01386174803	1044.36110668498	3985.03797729907	3385.13093940191	3866.02799847259	1020.8183523609	3745.39897172452	-1.87510461597219	9.26694464746728e-30	1.17168584569624e-28	-	Contig1258	45452	48185	-	2367	protein_coding	- && sp|Q9TTK6|AOC3_BOVIN Membrane primary amine oxidase OS=Bos taurus OX=9913 GN=AOC3 PE=2 SV=3 && - && PF09248:Domain of unknown function (DUF1965)|PF01179:Copper amine oxidase, enzyme domain	-
FPSE_01205	1586.89436709184	1478.39503114595	1243.81202821119	473.21014422377	396.78488361053	488.245788030242	1436.36714214966	452.746938621514	1.66611910209125	9.47567445917837e-30	1.19688254958455e-28	-	Contig0355	57382	57765	+	384	protein_coding	- && - && - && -	-
FPSE_05331	176.434261900307	145.148016711988	146.330826848375	8.39397151616444	14.3762638989322	9.98457644233624	155.971035153557	10.9182706191443	3.82755399771092	9.87413080053494e-30	1.24596975211133e-28	-	Contig1247	393167	394836	-	1371	protein_coding	- && - && - && PF08592:Domain of unknown function (DUF1772)	-
FPSE_10093	10.1399001092131	10.573696581668	13.0294571851293	139.549776456234	141.845803802798	159.75322307738	11.2476846253368	147.049601112137	-3.70920125645266	9.89365051790532e-30	1.24719063095863e-28	-	Contig1611	6455	7392	+	822	protein_coding	- && sp|P53047|RTA1_YEAST Protein RTA1 OS=Saccharomyces cerevisiae (strain ATCC 204508 / S288c) OX=559292 GN=RTA1 PE=1 SV=1 && - && PF04479:RTA1 like protein	RTA1
FPSE_05166	11567.5980445903	7374.67274314155	8354.88885347984	2195.023551477	1900.54208743884	2397.29680380493	9099.05321373722	2164.28748090692	2.07185107455333	9.92417489512671e-30	1.24979494777694e-28	-	Contig1245	145805	146949	-	1089	protein_coding	- && sp|O42896|YBQ3_SCHPO Uncharacterized oxidoreductase C115.03 OS=Schizosaccharomyces pombe (strain 972 / ATCC 24843) OX=284812 GN=SPBC115.03 PE=3 SV=1 && - && PF02894:Oxidoreductase family, C-terminal alpha/beta domain|PF01408:Oxidoreductase family, NAD-binding Rossmann fold	GFO_IDH_MocA
FPSE_01629	435.00171468524	370.079380358381	318.720568067009	81.8412222826033	77.6318250542341	60.905916298251	374.60055437021	73.4596545450295	2.35081593920579	1.01872394369042e-29	1.28164981555253e-28	-	Contig1190	390974	391783	-	810	protein_coding	- && - && - && -	-
FPSE_03754	267.693362883225	204.745215626844	182.41240059181	25.1819145484933	26.8356926113402	25.9598987500742	218.283659700627	25.9925019699692	3.06895947436364	1.17048879704669e-29	1.47112327081195e-28	-	Contig1218	24158	24666	-	456	protein_coding	- && - && - && -	-
FPSE_05918	928.814850003917	900.686699729358	1200.71459290653	2978.81064179886	3613.2343265983	3192.06908861489	1010.0720475466	3261.37135233735	-1.6912035702745	1.17383311602657e-29	1.47386439513782e-28	-	Contig1264	269843	276633	+	6687	protein_coding	- && sp|O93937|PYR1_EMENI Protein pyrABCN OS=Emericella nidulans (strain FGSC A4 / ATCC 38163 / CBS 112.46 / NRRL 194 / M139) OX=227321 GN=pyrABCN PE=3 SV=2 && - && PF02142:MGS-like domain|PF00117:Glutamine amidotransferase class-I|PF00988:Carbamoyl-phosphate synthase small chain, CPSase domain|PF00185:Aspartate/ornithine carbamoyltransferase, Asp/Orn binding domain|PF02787:Carbamoyl-phosphate sy…	CPSase_L_D2
FPSE_12175	50.6995005460653	34.6048251763681	43.0974353046585	244.474420408289	268.356926113402	342.470971972133	42.8005870090306	285.100772831275	-2.73819662222001	1.17890757446664e-29	1.47877030306118e-28	-	Contig2174	65255	67355	+	1950	protein_coding	- && - && - && -	-
novel.689	3600.67852878156	4854.28797612941	5549.54649492777	23612.2418749706	47723.4456388955	30144.4347370573	4668.17099994625	33826.7074169745	-2.85723384564654	1.19449727462693e-29	1.49684332069719e-28	-	Contig1645	117214	118517	-	1254	-	- && - && -	-
FPSE_02926	1012.97602091039	1037.18351014725	778.760633295805	241.326681089728	244.396486281848	175.728545385118	942.973388117815	220.483904252231	2.09664694345612	1.21321806648157e-29	1.51880036405682e-28	-	Contig1205	3243	5288	-	2046	protein_coding	- && sp|Q9R1M5|NALP5_MOUSE NACHT, LRR and PYD domains-containing protein 5 OS=Mus musculus OX=10090 GN=Nlrp5 PE=1 SV=2 && - && -	-
FPSE_02544	12097.9148203021	10268.0206259434	10114.8678394096	2823.52216874981	1889.99949391296	1547.60934856212	10826.9344285517	2087.0436704083	2.37524302705002	1.228042274746e-29	1.53584082712311e-28	-	Contig1199	115990	116249	+	204	protein_coding	- && - && - && -	-
FPSE_01481	2032.0359818863	1854.24188236706	1764.99031561636	758.605175773361	844.365899663954	768.81238605989	1883.75605995657	790.594487165735	1.25223945340384	1.25492534623204e-29	1.56649950109504e-28	-	Contig1163	184462	185922	-	1356	protein_coding	- && sp|P20073|ANXA7_HUMAN Annexin A7 OS=Homo sapiens OX=9606 GN=ANXA7 PE=1 SV=3 && - && PF00191:Annexin	-
FPSE_05999	1209.69008302912	1289.9909829635	1719.88834843707	4801.35170724606	5603.86766780379	4592.90516347467	1406.52313814323	4999.37484617484	-1.82968139004194	1.25502959476791e-29	1.56649950109504e-28	-	Contig1265	134242	134939	+	639	protein_coding	- && sp|P0CB50|PRDX1_CHICK Peroxiredoxin-1 OS=Gallus gallus OX=9031 GN=PRDX1 PE=1 SV=1 && - && PF00578:AhpC/TSA family|PF10417:C-terminal domain of 1-Cys peroxiredoxin	-
FPSE_07346	422.833834554185	495.041249050821	609.377689889124	1607.44554534549	1891.91632909948	1769.26694558198	509.084257831377	1756.20960667565	-1.78656285499912	1.36932344252889e-29	1.70747624935024e-28	-	Contig1365	87962	89369	-	1356	protein_coding	- && sp|H1ZZA4|AUAG_STIAU Aurachin C monooxygenase/isomerase OS=Stigmatella aurantiaca OX=41 GN=auaG PE=1 SV=1 && - && PF01266:FAD dependent oxidoreductase|PF01494:FAD binding domain	FAD_binding_3
FPSE_06125	395.456104259309	495.041249050821	540.221340214207	1462.64953669165	1730.90217343144	1494.69109341773	476.906231174779	1562.74760118028	-1.71224668669992	1.51310456271202e-29	1.88490872222208e-28	-	Contig1273	26756	27657	-	696	protein_coding	- && sp|Q08954|YP199_YEAST Smr domain-containing protein YPL199C OS=Saccharomyces cerevisiae (strain ATCC 204508 / S288c) OX=559292 GN=YPL199C PE=1 SV=1 && - && PF08590:Domain of unknown function (DUF1771)|PF01713:Smr domain	Smr
FPSE_00540	43738.4591210905	29811.0956442973	29123.8436065759	8140.05387780047	5252.12841107658	5367.70829539996	34224.4661239879	6253.29686142567	2.45238398390862	1.91506665454638e-29	2.38329857037801e-28	-	Contig0340	66431	68167	+	1686	protein_coding	- && sp|A0A1V6PBE7|CALL_PENDC Cytochrome P450 monooxygenase calL OS=Penicillium decumbens OX=69771 GN=calL PE=1 SV=1 && - && PF00067:Cytochrome P450	p450
FPSE_08969	2484.2755267572	2196.44515355559	1978.47296026502	819.461469265554	640.222952299116	719.887961492443	2219.73121352593	726.524127685704	1.61176369827884	2.03040578160001e-29	2.52435827743774e-28	-	Contig1584	32016	32735	+	720	protein_coding	- && - && - && PF00583:Acetyltransferase (GNAT) family	Acetyltransf_1
FPSE_05445	270.735332915989	221.086383071241	276.625398699668	28.329653867055	47.9208796631075	35.9444751924104	256.149038228966	37.3983362408576	2.77009196152249	2.08517077877318e-29	2.58990476434092e-28	-	Contig1250	54297	55235	-	939	protein_coding	- && - && - && PF05368:NmrA-like family	NmrA
FPSE_12183	5586.07097016548	5580.02805968935	5190.73528936805	1373.46358933241	1728.98533824492	1057.36664524341	5452.27810640763	1386.60519094024	1.97514434772364	2.24174915197457e-29	2.78165719944817e-28	-	Contig2174	84587	86437	-	1851	protein_coding	- && - && - && -	-
FPSE_02243	642.869666924108	462.358914162029	511.155628031996	119.614094105343	77.6318250542341	107.833425577231	538.794736372711	101.69311491227	2.40762608647419	2.27349583934441e-29	2.81828950965306e-28	-	Contig1195	463004	465182	-	1905	protein_coding	- && - && - && -	-
FPSE_02177	261.609422817697	223.008873358817	248.561952454774	52.4623219760278	38.336703730486	45.9290516347467	244.393416210429	45.5760257804201	2.42599421072186	2.39815134743606e-29	2.96991001179545e-28	-	Contig1195	313660	315611	+	1749	protein_coding	- && sp|A0A2Z5U1Z1|HIMD_ASPJA Transcription factor himD OS=Aspergillus japonicus OX=34381 GN=himD PE=3 SV=1 && - && -	-
FPSE_11465	370.106353986277	403.722960390961	711.608815495523	32.5266396251372	54.6298028159425	27.9568140385415	495.14604329092	38.3710854932071	3.68623420972779	2.86723807982085e-29	3.5473671126221e-28	-	Contig2156	363495	364058	+	564	protein_coding	- && - && - && -	-
FPSE_12114	354.896503822457	278.761091698521	331.750025252138	65.0532792502744	75.7149898677098	73.8858656732881	321.802540257705	71.5513782637574	2.16722253583194	3.07383432457383e-29	3.79925922517326e-28	-	Contig2172	129021	131533	+	2355	protein_coding	- && sp|P41363|ELYA_BACHD Thermostable alkaline protease OS=Bacillus halodurans (strain ATCC BAA-125 / DSM 18197 / FERM 7344 / JCM 9153 / C-125) OX=272558 GN=BH0855 PE=1 SV=2 && - && PF00082:Subtilase family|PF12796:Ankyrin repeats (3 copies)	Peptidase_S8
FPSE_01326	717.904927732285	760.34490873631	656.484188943053	1657.80937444248	1732.81900861797	1926.02479572666	711.578008470549	1772.21772626237	-1.31635239639996	3.27036614527333e-29	4.03823281622494e-28	-	Contig0358	122533	123524	-	936	protein_coding	- && - && - && -	-
FPSE_08964	5720.93164161801	6763.32083169238	5194.74435311732	17191.9029115443	14940.7718613636	16048.209715767	5892.99894214257	16060.2948295583	-1.4463651452983	3.34678008578634e-29	4.12856445051871e-28	-	Contig1584	23175	23306	+	81	protein_coding	- && - && - && -	-
FPSE_11670	209.89593226071	247.040001953517	312.706972443103	935.927824052335	1116.5564961504	940.547100868073	256.547635552443	997.677140356937	-1.95948428050444	3.45407546203138e-29	4.25677840743926e-28	-	Contig2161	214104	215277	+	1068	protein_coding	- && sp|P38347|EFM2_YEAST Protein-lysine N-methyltransferase EFM2 OS=Saccharomyces cerevisiae (strain ATCC 204508 / S288c) OX=559292 GN=EFM2 PE=1 SV=1 && - && PF10294:Lysine methyltransferase	-
FPSE_10271	2978.08866207588	3575.83193489137	2574.82119296901	8649.98764740746	10500.4231517801	10292.1013967602	3042.91392997875	9814.17073198259	-1.68936821900482	3.63307965891342e-29	4.47303072874385e-28	-	Contig1618	72412	73016	+	534	protein_coding	- && - && - && PF07110:EthD domain	-
FPSE_00130	543.49864585382	555.599693109465	698.579358310394	1673.54807103529	1999.25909954484	2068.80423885207	599.225899091227	1913.87046981073	-1.6755449336712	3.80204405203755e-29	4.67651418400619e-28	-	Contig0333	109903	113741	-	3621	protein_coding	- && - && - && -	-
FPSE_11509	850.737619162976	713.243896690698	611.38222176376	207.75079502507	187.849848279381	172.733172452417	725.121245872478	189.444605252289	1.93691656335218	3.92957219436124e-29	4.82868575464234e-28	-	Contig2156	488399	489163	-	765	protein_coding	- && - && - && -	-
FPSE_05574	90.2451109719963	118.233152685924	119.269646540799	396.61515413877	449.497851239948	407.370718847318	109.249303399573	417.827908075345	-1.93468185979193	3.94713375732202e-29	4.84556565615433e-28	-	Contig1252	198438	199474	+	981	protein_coding	- && - && - && -	-
FPSE_04475	256.53947276309	185.520312751084	196.444123714257	4.19698575808222	0	3.99383057693449	212.834636409477	2.73027211167224	6.31397052302042	4.04132244866332e-29	4.95639052295408e-28	-	Contig1229	23605	25841	-	1779	protein_coding	- && - && - && PF00012:Hsp70 protein	HSP70
FPSE_09576	623.603856716603	500.808719913549	495.119373034914	117.515601226302	149.513144548895	145.774816058109	539.843983221689	137.601187277769	1.97032169900294	4.19646732796638e-29	5.14168709651897e-28	-	Contig1593	330180	331256	-	1077	protein_coding	- && - && - && -	-
FPSE_10168	199.756032151497	249.923737384881	333.754557126774	1316.8042815983	1248.81812402058	1055.36972995494	261.144775554384	1206.99737852461	-2.2083915899834	4.416318094684e-29	5.40582936633348e-28	-	Contig1614	23837	25711	+	1770	protein_coding	- && sp|P53838|BOR1_YEAST Boron transporter 1 OS=Saccharomyces cerevisiae (strain ATCC 204508 / S288c) OX=559292 GN=BOR1 PE=1 SV=1 && - && PF00955:HCO3- transporter family	-
FPSE_07382	45.6295504914588	56.7134634834921	42.0951693673408	251.819145484933	232.895475162702	240.628292260303	48.1460611140973	241.780970969313	-2.32588093816104	4.93617838875096e-29	6.03633629412026e-28	-	Contig1365	171392	172212	+	753	protein_coding	- && - && - && -	-
FPSE_04368	352.868523800615	291.257278567765	370.838396807526	970.552956556514	1139.5585183887	1236.09056356123	338.321399725302	1115.40067950215	-1.72178463662154	5.07441254891036e-29	6.19939562026474e-28	-	Contig1225	99407	100055	+	363	protein_coding	- && sp|Q3E793|BOL1_YEAST BolA-like protein 1 OS=Saccharomyces cerevisiae (strain ATCC 204508 / S288c) OX=559292 GN=BOL1 PE=1 SV=1 && - && PF01722:BolA-like protein	-
FPSE_12045	1722.7690285553	1761.96234856341	1814.10134654493	0	0	0	1766.27757455454	0	13.2272272246102	5.23742410750837e-29	6.39238208266123e-28	-	Contig2170	39179	41240	-	1869	protein_coding	- && - && - && PF12937:F-box-like	-
FPSE_08426	273.777302948753	421.986618122933	317.718302129691	1313.65654227974	1455.8363241652	1797.22375962052	337.827407733792	1522.23887535515	-2.17127418800525	5.25823138519702e-29	6.41160090655063e-28	-	Contig1571	60770	62152	+	1338	protein_coding	- && - && - && PF12505:Protein of unknown function (DUF3712)	-
FPSE_11354	777.730338376642	652.685452632054	568.284786459101	183.618126916097	132.261627870177	144.776358413875	666.233525822599	153.552037733383	2.11891695439073	6.01475721455143e-29	7.32701530299539e-28	-	Contig2156	89754	96366	-	6219	protein_coding	- && - && - && PF12796:Ankyrin repeats (3 copies)|PF00622:SPRY domain	SPRY
FPSE_08296	156.154461681881	188.404048182448	191.432794027669	24.1326681089728	23.9604398315537	18.9706952404388	178.663767964	22.3546010603218	2.99920240567881	6.11461703855668e-29	7.44150655729823e-28	-	Contig1567	90882	92675	-	1668	protein_coding	- && - && - && PF12796:Ankyrin repeats (3 copies)	-
FPSE_07756	216.99386233716	252.807472816245	289.654855884798	789.033322519457	1006.33847292526	1025.41600062793	253.152063679401	940.262598690882	-1.89321219427056	6.19304864323643e-29	7.52972488110963e-28	-	Contig1465	8108	9843	-	1623	protein_coding	- && sp|N1PA11|MAL11_YEASC General alpha-glucoside permease OS=Saccharomyces cerevisiae (strain CEN.PK113-7D) OX=889517 GN=MAL11 PE=3 SV=1 && - && PF00083:Sugar (and other) transporter	Sugar_tr
FPSE_10361	1703.50321834779	1612.00810613248	1504.40117191378	436.486518840551	534.797017040279	600.073044184408	1606.63749879802	523.785526688413	1.61644501752635	6.29701653594822e-29	7.64879218541975e-28	-	Contig1623	4615	6352	+	1689	protein_coding	- && - && - && PF00172:Fungal Zn(2)-Cys(6) binuclear cluster domain	Zn_clus
FPSE_04701	195.700072107812	162.450429300172	149.337624660328	11.5417108347261	1.9168351865243	4.99228822116812	169.162708689438	6.15027808080617	4.80833559028387	6.7430490975455e-29	8.1827288330272e-28	-	Contig1235	82173	83432	+	1260	protein_coding	- && sp|A0A2U8U2L4|ASL4_SARSH FAD-dependent monooxygenase asL4 OS=Sarocladium schorii OX=2203296 GN=asL4 PE=1 SV=1 && - && PF01494:FAD binding domain	FAD_binding_3
FPSE_06042	318.39286342929	223.970118502605	250.56648432941	38.8221182622605	19.168351865243	19.9691528846725	264.309822087101	25.9865410040587	3.35402053366155	7.74739909279325e-29	9.39251666091844e-28	-	Contig1268	8958	11102	+	2097	protein_coding	- && - && - && -	-
FPSE_10428	419.791864521421	289.334788280189	286.648058072845	52.4623219760278	58.4634731889911	49.9228822116812	331.924903624818	53.6162257922334	2.62884976402824	7.84307163634522e-29	9.49941439396344e-28	-	Contig1627	326	844	-	519	protein_coding	- && - && - && -	-
FPSE_07029	1556.47466676421	1091.97448334317	857.939642343899	11.5417108347261	23.0020222382916	4.99228822116812	1168.79626415043	13.1786737647286	6.46593930245513	8.67938652195503e-29	1.0492285099871e-27	-	Contig1362	25536	26951	+	981	protein_coding	- && sp|S0EG57|ME178_GIBF5 Methyltransferase FFUJ_09178 OS=Gibberella fujikuroi (strain CBS 195.34 / IMI 58289 / NRRL A-6831) OX=1279085 GN=FFUJ_09178 PE=2 SV=1 && - && PF13489:Methyltransferase domain	-
FPSE_07596	4156.34505476644	2982.74368117417	3094.99721443687	1024.06452497206	758.10831627036	774.803131925292	3411.36198345916	852.325324389238	2.00117185289338	9.55076453153756e-29	1.15346650000047e-27	-	Contig1376	60595	62310	-	1620	protein_coding	- && sp|A0A482NAL3|ICCF_TALVA Cytochrome P450 monooxygenase iccF OS=Talaromyces variabilis OX=28576 GN=iccF PE=3 SV=1 && - && PF00067:Cytochrome P450	p450
FPSE_10429	796.996148584147	582.514557135529	521.178287405172	136.402037137672	131.303210276914	143.777900769642	633.562997708283	137.161049394743	2.20759160702423	1.12424273862957e-28	1.35647916720934e-27	-	Contig1627	2591	3692	+	948	protein_coding	- && - && - && PF11951:Fungal specific transcription factor domain	-
FPSE_03980	151.084511627275	193.210273901388	133.301369663246	8.39397151616444	8.62575833935934	11.9814917308035	159.198718397303	9.66707386210909	4.04151387597435	1.12580369301253e-28	1.35707012243346e-27	-	Contig1220	150971	152461	+	1491	protein_coding	- && - && - && PF11051:Mannosyltransferase putative	-
FPSE_03097	0	0	0	1579.11589147844	1691.60705210769	1700.37336812986	0	1657.03210390533	-13.1483887306565	1.15841083207224e-28	1.39504817790144e-27	-	Contig1206	54750	56782	+	1794	protein_coding	- && - && - && PF03126:Plus-3 domain	-
FPSE_02489	415.735904477736	376.808096364897	268.607271201127	61.9055399317128	45.045626883321	57.9105433655502	353.717090681253	54.953903393528	2.68872439957305	1.22693550978311e-28	1.47616770877894e-27	-	Contig1198	251308	252828	+	903	protein_coding	- && sp|I1S2J8|FGM4_GIBZE Transcription regulator FGM4 OS=Gibberella zeae (strain ATCC MYA-4620 / CBS 123657 / FGSC 9075 / NRRL 31084 / PH-1) OX=229533 GN=FGM4 PE=2 SV=1 && - && PF12796:Ankyrin repeats (3 copies)	-
FPSE_03448	486.715205242227	327.784594031709	417.944895861455	67.1517721293155	76.6734074609719	45.9290516347467	410.814898378464	63.2514104083447	2.69812430301078	1.29655026977152e-28	1.55844358327661e-27	-	Contig1213	29905	31593	-	1593	protein_coding	- && sp|S0DQN6|FSR3_GIBF5 FAD-dependent monooxygenase fsr3 OS=Gibberella fujikuroi (strain CBS 195.34 / IMI 58289 / NRRL A-6831) OX=1279085 GN=fsr3 PE=2 SV=1 && - && PF01494:FAD binding domain	FAD_binding_3
FPSE_04011	533.358745744607	421.025372979145	287.650324010162	59.8070470526716	47.9208796631075	40.9367634135786	414.011480911305	49.5548967097859	3.06428416457427	1.3052695387011e-28	1.56743694652173e-27	-	Contig1220	229210	231642	-	2433	protein_coding	- && sp|Q01738|CDH_PHACH Cellobiose dehydrogenase OS=Phanerochaete chrysosporium OX=5306 GN=CDH-1 PE=1 SV=1 && - && PF00732:GMC oxidoreductase|PF05199:GMC oxidoreductase|PF16010:Cytochrome domain of cellobiose dehydrogenase	-
FPSE_09338	237.273662555586	212.435176777149	215.487176523292	18.88643591137	36.4198685439617	16.9737799519716	221.732005285342	24.0933614691011	3.19395659259377	1.51337447134818e-28	1.81561942968845e-27	-	Contig1591	33869	34586	-	402	protein_coding	- && - && - && -	-
FPSE_04655	247.413562664799	265.303659685489	320.725099941644	824.707701463156	950.750252516052	828.719844713907	277.814107430644	868.059266231039	-1.64397271787941	1.61011616483093e-28	1.92985446473445e-27	-	Contig1234	83405	84513	+	978	protein_coding	- && sp|P54119|CDK1_AJECA Cyclin-dependent kinase 1 OS=Ajellomyces capsulatus OX=5037 GN=CDC2 PE=3 SV=1 && - && PF00069:Protein kinase domain	Pkinase
FPSE_10478	3125.11721365947	3542.18835485879	4028.10680207959	8694.05599786732	8857.69539692878	8865.30542315034	3565.13745686595	8805.68560598215	-1.30446673347064	1.64037500819628e-28	1.9642637976218e-27	-	Contig1629	10725	14586	+	3813	protein_coding	- && sp|Q9Z1A6|VIGLN_RAT Vigilin OS=Rattus norvegicus OX=10116 GN=Hdlbp PE=1 SV=1 && - && PF00013:KH domain	KH_1
FPSE_05176	5816.24670264461	9590.3427995729	6772.31093845528	1692.43450694666	1638.89408447828	1221.11369889772	7392.9668135576	1517.48076344088	2.28453321221408	1.94325973965347e-28	2.32475520695655e-27	-	Contig1245	187932	189408	+	1203	protein_coding	- && - && - && PF02668:Taurine catabolism dioxygenase TauD, TfdA family	-
FPSE_07164	815.24796878073	897.802964297994	901.037077648557	1856.11695151186	1962.83923100088	2109.74100226565	871.362670242427	1976.23239492613	-1.1813645535027	2.03214214344451e-28	2.42879328446212e-27	XlnR	Contig1364	45977	48880	+	2805	protein_coding	- && sp|G4MZJ4|XLNR_MAGO7 Xylanolytic transcriptional activator xlnR homolog OS=Magnaporthe oryzae (strain 70-15 / ATCC MYA-4617 / FGSC 8958) OX=242507 GN=xlr1 PE=3 SV=1 && - && PF00172:Fungal Zn(2)-Cys(6) binuclear cluster domain|PF04082:Fungal specific transcription factor domain	Fungal_trans
FPSE_03053	1141.75275229739	1082.36203190529	1010.28406481618	446.978983235757	476.333543851288	447.309024616663	1078.13294967295	456.873850567903	1.23833419327126	2.40619867226398e-28	2.87315089339419e-27	-	Contig1205	353188	355978	+	2667	protein_coding	- && - && - && PF11915:Protein of unknown function (DUF3433)	-
FPSE_03641	8393.80931040657	7142.05141834486	7073.99298558789	3088.98151794851	2428.63018132629	2758.7384710175	7536.61790477978	2758.78339009743	1.45001760182376	2.83717782835814e-28	3.38139284171865e-27	-	Contig1216	177284	179008	+	1725	protein_coding	- && - && - && PF01344:Kelch motif|PF13418:Galactose oxidase, central domain	Kelch_1
FPSE_03439	2041.16189198459	1683.14024677279	1592.60057439773	641.089574547059	533.838599447017	609.05916298251	1772.30090438504	594.662445658862	1.57583347153208	3.0090721221648e-28	3.58288860110018e-27	-	Contig1213	3927	4706	-	780	protein_coding	- && - && - && -	-
FPSE_06037	246.399572653877	246.078756809729	217.491708397928	672.566967732676	607.636754128203	647.999011107622	236.656679287178	642.734244322833	-1.44094415267128	3.1074554736271e-28	3.6965590042612e-27	-	Contig1267	59047	59790	-	744	protein_coding	- && sp|Q2TXI3|FM522_ASPOR Protein fmp52-2, mitochondrial OS=Aspergillus oryzae (strain ATCC 42149 / RIB 40) OX=510516 GN=fmp522 PE=3 SV=1 && - && PF01370:NAD dependent epimerase/dehydratase family	Epimerase
FPSE_03337	5795.96690242619	6405.73763820325	6894.58738280804	13738.8328790821	14977.1917299076	15948.3639513437	6365.43064114582	14888.1295201111	-1.22583665946435	3.15306230394761e-28	3.74729327661466e-27	TUB	Contig1210	53576	55205	-	1341	protein_coding	- && sp|Q4HZS8|TBB_GIBZE Tubulin beta chain OS=Gibberella zeae (strain ATCC MYA-4620 / CBS 123657 / FGSC 9075 / NRRL 31084 / PH-1) OX=229533 GN=TUB2 PE=3 SV=1 && - && PF03953:Tubulin C-terminal domain|PF00091:Tubulin/FtsZ family, GTPase domain	Tubulin
FPSE_00325	1064.68951146737	744.003741291914	779.762899233123	214.046273662193	171.556749193925	219.660681731397	862.818717330803	201.754568195838	2.0970377288428	3.43525918008413e-28	4.07538854505324e-27	-	Contig0336	86372	87946	-	1470	protein_coding	- && sp|Q9HFE4|FMO1_SCHPO Thiol-specific monooxygenase OS=Schizosaccharomyces pombe (strain 972 / ATCC 24843) OX=284812 GN=fmo1 PE=1 SV=1 && - && PF00743:Flavin-binding monooxygenase-like|PF13450:NAD(P)-binding Rossmann-like domain	FMO-like
FPSE_04705	667.20542718622	811.290901357074	697.577092373077	231.883463134043	228.103387196392	262.594360433443	725.357806972123	240.860403587959	1.59081067600542	3.43556315898402e-28	4.07538854505324e-27	-	Contig1235	92732	94999	+	2268	protein_coding	- && - && - && -	-
FPSE_08843	2092.87538254158	2295.45340336575	2266.12328427518	5284.00506942552	4523.73104019734	4861.49026977351	2218.15069006084	4889.74212646546	-1.14025162725667	3.44553545651326e-28	4.08339463971623e-27	-	Contig1580	69163	70428	-	1266	protein_coding	- && sp|Q10294|PAC2_SCHPO cAMP-independent regulatory protein pac2 OS=Schizosaccharomyces pombe (strain 972 / ATCC 24843) OX=284812 GN=pac2 PE=2 SV=1 && - && PF09729:Gti1/Pac2 family	-
FPSE_09223	1736.9648887082	1722.5512976681	1728.90874187293	831.00318010028	696.769590301583	735.863283800181	1729.47497608307	754.545351400681	1.19723435208786	3.61577865614057e-28	4.27768830638018e-27	-	Contig1589	23234	25276	+	1950	protein_coding	- && - && - && PF00326:Prolyl oligopeptidase family	-
FPSE_09800	1316.15903417586	1118.88934736923	1270.87320851877	2896.96941951625	2676.86033798118	2766.72613217137	1235.30719668795	2780.18529655627	-1.17044797200104	3.61623188581038e-28	4.27768830638018e-27	-	Contig1600	3782	10043	-	5511	protein_coding	- && sp|Q6FT12|LTE1_CANGA Guanine nucleotide exchange factor LTE1 OS=Candida glabrata (strain ATCC 2001 / CBS 138 / JCM 3761 / NBRC 0622 / NRRL Y-65) OX=284593 GN=LTE1 PE=3 SV=1 && - && PF00617:RasGEF domain|PF00618:RasGEF N-terminal motif	-
FPSE_02838	137.902641485298	140.341790993048	152.344422472281	15.7386965928083	9.58417593262149	9.98457644233624	143.529618316876	11.769149655922	3.61676313276211	3.66021204163599e-28	4.32567410032522e-27	-	Contig1203	87372	88702	-	1185	protein_coding	- && - && - && -	-
novel.426	197.728052129655	134.57432013032	158.358018096187	3.14773931856167	9.58417593262149	3.99383057693449	163.553463452054	5.57524860937255	4.85489734555669	3.75849538783897e-28	4.43768667926672e-27	-	Contig1360	72869	73922	+	1006	-	- && - && -	-
FPSE_02481	128.776731387006	198.977744764116	169.382943406681	3.14773931856167	5.7505055595729	3.99383057693449	165.712473185934	4.29735848502302	5.25885625104554	3.80128023091644e-28	4.48402413831288e-27	-	Contig1198	230765	232509	-	1539	protein_coding	- && sp|S4W283|EQXH_FUSHE Cytochrome P450 monooxygenase eqxH OS=Fusarium heterosporum OX=42747 GN=eqxH PE=3 SV=1 && - && PF00067:Cytochrome P450	p450
FPSE_10350	16319.1552357675	13255.5705328366	12122.4065118568	5002.80702363401	4164.32444272404	4789.60131938869	13899.044093487	4652.24426191558	1.57903309992474	3.93269410867845e-28	4.63472573607882e-27	-	Contig1622	20058	21894	+	1713	protein_coding	- && sp|Q2UKV4|PDC_ASPOR Pyruvate decarboxylase OS=Aspergillus oryzae (strain ATCC 42149 / RIB 40) OX=510516 GN=pdcA PE=3 SV=1 && - && PF02775:Thiamine pyrophosphate enzyme, C-terminal TPP binding domain|PF02776:Thiamine pyrophosphate enzyme, N-terminal TPP binding domain|PF00205:Thiamine pyrophosphate enzyme, central domain	TPP_enzyme_N
FPSE_08069	187.588152020442	134.57432013032	139.314965287152	11.5417108347261	7.66734074609719	7.98766115386899	153.825812479305	9.0655709115641	4.09121112009784	4.00612189417855e-28	4.71687344585019e-27	-	Contig1564	127142	128130	-	891	protein_coding	- && - && - && -	-
FPSE_09351	443.113634772611	434.482804992177	433.981150858538	121.712586984384	145.679474175847	148.77018899081	437.192530207775	138.720750050347	1.65454791657319	4.05126660506866e-28	4.76559857192339e-27	-	Contig1591	61405	62262	-	858	protein_coding	- && sp|J9VH94|PDK1_CRYNH Serine/threonine-protein kinase PDK1 OS=Cryptococcus neoformans var. grubii serotype A (strain H99 / ATCC 208821 / CBS 10515 / FGSC 9487) OX=235443 GN=PDK1 PE=3 SV=2 && - && PF07714:Protein tyrosine and serine/threonine kinase	Pkinase_Tyr
FPSE_01335	4111.7294942859	4939.83879392654	5489.41053868871	13865.7916982641	12470.9297235271	14563.5031987916	4846.99294230038	13633.408206861	-1.49195395932344	4.06398567934918e-28	4.77612565599951e-27	-	Contig0358	159426	160490	+	1065	protein_coding	- && - && - && -	-
FPSE_10346	1376.99843483113	1055.44716787923	1057.39056387011	3245.31923743708	3772.33164707982	4085.68868020399	1163.27872219349	3701.11318824029	-1.66996341787465	4.78748368836352e-28	5.62118914252803e-27	-	Contig1622	8285	9338	+	918	protein_coding	- && sp|P53045|MSMO_YEAST Methylsterol monooxygenase OS=Saccharomyces cerevisiae (strain ATCC 204508 / S288c) OX=559292 GN=ERG25 PE=1 SV=1 && - && PF04116:Fatty acid hydroxylase superfamily	-
FPSE_04472	380.24625409549	307.598446012161	248.561952454774	44.0683504598633	57.505055595729	48.9244245674476	312.135550854142	50.1659435410133	2.63494213486118	5.26270453968015e-28	6.17344479751925e-27	-	Contig1229	17893	19911	+	2019	protein_coding	- && - && - && PF06985:Heterokaryon incompatibility protein (HET)	-
FPSE_09658	81012.7319225578	51215.1412610248	48862.4689761095	13999.0459960832	13832.8411235526	14265.96282081	60363.447386564	14032.6166468153	2.1048882845186	5.3058556459199e-28	6.21830575191111e-27	-	Contig1595	129378	131237	-	1371	protein_coding	- && sp|F9X3D9|HCS1_ZYMTI Hydroxymethylglutaryl-CoA synthase MYCGRDRAFT_54740 OS=Zymoseptoria tritici (strain CBS 115943 / IPO323) OX=336722 GN=ERG13 PE=3 SV=1 && - && PF01154:Hydroxymethylglutaryl-coenzyme A synthase N terminal|PF08540:Hydroxymethylglutaryl-coenzyme A synthase C terminal	-
FPSE_04362	150.070521616353	168.2179001629	164.371613720093	459.569940510003	463.87411513888	457.293601059	160.886678499782	460.245885569294	-1.51589030713433	5.72693892934145e-28	6.70559975007641e-27	-	Contig1225	78501	80634	-	2070	protein_coding	- && sp|P40986|CDC1_YEAST Cell division control protein 1 OS=Saccharomyces cerevisiae (strain ATCC 204508 / S288c) OX=559292 GN=CDC1 PE=1 SV=2 && - && PF00149:Calcineurin-like phosphoesterase	Metallophos
FPSE_05092	27736.6827587414	20009.2789130911	19021.0029584141	6693.14303770162	6742.46776859922	6907.32998280821	22255.6548767489	6780.98026303635	1.71459563639216	6.37739713213821e-28	7.46031803019936e-27	-	Contig1244	124514	126058	+	1389	protein_coding	- && sp|Q7S4Z6|FDFT_NEUCR Probable squalene synthase OS=Neurospora crassa (strain ATCC 24698 / 74-OR23-1A / CBS 708.71 / DSM 1257 / FGSC 987) OX=367110 GN=erg-6 PE=3 SV=1 && - && PF00494:Squalene/phytoene synthase	-
FPSE_02310	1387.13833494035	1129.4630439509	1153.6080938526	446.978983235757	450.45626883321	474.267381010971	1223.40315758128	457.234211026646	1.41968853155819	6.92831618829359e-28	8.09730975917818e-27	-	Contig1197	10734	12056	+	1323	protein_coding	- && sp|O34371|YTET_BACSU Putative oxidoreductase YteT OS=Bacillus subtilis (strain 168) OX=224308 GN=yteT PE=2 SV=1 && - && PF01408:Oxidoreductase family, NAD-binding Rossmann fold|PF02894:Oxidoreductase family, C-terminal alpha/beta domain	GFO_IDH_MocA_C
FPSE_00013	1413.5020752243	1360.16187846002	1463.30826848375	3449.92229314359	3241.36830041259	4115.642409531	1412.32407405603	3602.31100102906	-1.35087488929415	7.13307213219804e-28	8.32893003159603e-27	-	Contig0332	41771	44210	+	2232	protein_coding	- && sp|P33277|GAP1_SCHPO GTPase-activating protein OS=Schizosaccharomyces pombe (strain 972 / ATCC 24843) OX=284812 GN=gap1 PE=4 SV=1 && - && PF03836:RasGAP C-terminus|PF00616:GTPase-activator protein for Ras-like GTPase	-
FPSE_05050	395.456104259309	411.412921541265	384.870119929973	125.909572742467	132.261627870177	133.793324327306	397.246381910183	130.65484164665	1.60394558251717	7.93683794354274e-28	9.25891343524337e-27	-	Contig1244	19534	20741	-	1107	protein_coding	- && sp|P70792|TTUC4_AGRVI Probable tartrate dehydrogenase/decarboxylase TtuC' OS=Agrobacterium vitis OX=373 GN=ttuC' PE=2 SV=1 && - && PF00180:Isocitrate/isopropylmalate dehydrogenase	-
[truncated: 2,968 more rows]
