# Supplementary material
Source: MDPI journal article supplement (https://www.mdpi.com/2071-1050/15/14/11401)
Supplement: s1 [file s1 › Table S3.xls]

Category	GOID	Description	GeneRatio	BgRatio	pvalue	padj	geneID	geneName	Count	Up	Up_Gene_id	Down	Down_Gene_id
CC	GO:0016021	integral component of membrane	129/262	353/1099	2.26255724162794e-11	6.22203241447684e-10	FPSE_06765/FPSE_12004/FPSE_11047/FPSE_09528/FPSE_10431/FPSE_08297/FPSE_01589/FPSE_07857/FPSE_01863/FPSE_05542/FPSE_06119/FPSE_11895/FPSE_02575/FPSE_04549/FPSE_02298/FPSE_07589/FPSE_09168/FPSE_09494/FPSE_05606/FPSE_01892/FPSE_09480/FPSE_05508/FPSE_04464/FPSE_11476/FPSE_06559/FPSE_06451/FPSE_06310/FPSE_07033/FPSE_10595/FPSE_03812/FPSE_03730/FPSE_09499/FPSE_05157/FPSE_10093/FPSE_10168/FPSE_07756/FPS…	-/-/-/-/STE6-1/-/-/-/-/-/-/-/-/-/-/-/-/-/-/-/-/-/-/NPS19/-/-/-/-/-/-/-/ABC2/-/-/-/-/-/-/-/-/-/-/-/-/-/-/-/-/-/-/-/-/-/-/-/-/-/-/-/-/-/-/-/-/-/-/-/-/-/-/-/-/-/-/-/-/-/-/-/-/-/-/STE6-2/-/-/-/-/-/-/-/-/-/-/-/-/-/-/-/-/-/-/-/-/-/-/-/-/-/-/-/-/-/STE3/-/-/-/-/-/-/-/-/-/-/-/-/-/-/-/-	129	69	FPSE_12004/FPSE_09528/FPSE_10431/FPSE_08297/FPSE_01589/FPSE_07857/FPSE_05542/FPSE_11895/FPSE_02575/FPSE_07589/FPSE_09494/FPSE_05606/FPSE_09480/FPSE_05508/FPSE_04464/FPSE_11476/FPSE_06451/FPSE_06310/FPSE_07033/FPSE_03812/FPSE_03730/FPSE_09499/FPSE_06276/FPSE_04130/FPSE_10849/FPSE_02197/FPSE_02454/FPSE_02262/FPSE_07207/FPSE_09336/FPSE_05712/FPSE_00902/FPSE_02184/FPSE_01364/FPSE_02725/FPSE_11721/FPS…	60	FPSE_06765/FPSE_11047/FPSE_01863/FPSE_06119/FPSE_04549/FPSE_02298/FPSE_09168/FPSE_01892/FPSE_06559/FPSE_10595/FPSE_05157/FPSE_10093/FPSE_10168/FPSE_07756/FPSE_07958/FPSE_02380/FPSE_08109/FPSE_04333/FPSE_05341/FPSE_04782/FPSE_04157/FPSE_05912/FPSE_01407/FPSE_10449/FPSE_10729/FPSE_03137/FPSE_06328/FPSE_01440/FPSE_07744/FPSE_00308/FPSE_07061/FPSE_09265/FPSE_09080/FPSE_05396/FPSE_11773/FPSE_02451/FPS…
CC	GO:0031224	intrinsic component of membrane	129/262	353/1099	2.26255724162794e-11	6.22203241447684e-10	FPSE_06765/FPSE_12004/FPSE_11047/FPSE_09528/FPSE_10431/FPSE_08297/FPSE_01589/FPSE_07857/FPSE_01863/FPSE_05542/FPSE_06119/FPSE_11895/FPSE_02575/FPSE_04549/FPSE_02298/FPSE_07589/FPSE_09168/FPSE_09494/FPSE_05606/FPSE_01892/FPSE_09480/FPSE_05508/FPSE_04464/FPSE_11476/FPSE_06559/FPSE_06451/FPSE_06310/FPSE_07033/FPSE_10595/FPSE_03812/FPSE_03730/FPSE_09499/FPSE_05157/FPSE_10093/FPSE_10168/FPSE_07756/FPS…	-/-/-/-/STE6-1/-/-/-/-/-/-/-/-/-/-/-/-/-/-/-/-/-/-/NPS19/-/-/-/-/-/-/-/ABC2/-/-/-/-/-/-/-/-/-/-/-/-/-/-/-/-/-/-/-/-/-/-/-/-/-/-/-/-/-/-/-/-/-/-/-/-/-/-/-/-/-/-/-/-/-/-/-/-/-/-/STE6-2/-/-/-/-/-/-/-/-/-/-/-/-/-/-/-/-/-/-/-/-/-/-/-/-/-/-/-/-/-/STE3/-/-/-/-/-/-/-/-/-/-/-/-/-/-/-/-	129	69	FPSE_12004/FPSE_09528/FPSE_10431/FPSE_08297/FPSE_01589/FPSE_07857/FPSE_05542/FPSE_11895/FPSE_02575/FPSE_07589/FPSE_09494/FPSE_05606/FPSE_09480/FPSE_05508/FPSE_04464/FPSE_11476/FPSE_06451/FPSE_06310/FPSE_07033/FPSE_03812/FPSE_03730/FPSE_09499/FPSE_06276/FPSE_04130/FPSE_10849/FPSE_02197/FPSE_02454/FPSE_02262/FPSE_07207/FPSE_09336/FPSE_05712/FPSE_00902/FPSE_02184/FPSE_01364/FPSE_02725/FPSE_11721/FPS…	60	FPSE_06765/FPSE_11047/FPSE_01863/FPSE_06119/FPSE_04549/FPSE_02298/FPSE_09168/FPSE_01892/FPSE_06559/FPSE_10595/FPSE_05157/FPSE_10093/FPSE_10168/FPSE_07756/FPSE_07958/FPSE_02380/FPSE_08109/FPSE_04333/FPSE_05341/FPSE_04782/FPSE_04157/FPSE_05912/FPSE_01407/FPSE_10449/FPSE_10729/FPSE_03137/FPSE_06328/FPSE_01440/FPSE_07744/FPSE_00308/FPSE_07061/FPSE_09265/FPSE_09080/FPSE_05396/FPSE_11773/FPSE_02451/FPS…
CC	GO:0044425	membrane part	131/262	415/1099	2.48546638386316e-06	4.55668837041579e-05	FPSE_06765/FPSE_12004/FPSE_11047/FPSE_09528/FPSE_10431/FPSE_08297/FPSE_01589/FPSE_07857/FPSE_01863/FPSE_05542/FPSE_06119/FPSE_11895/FPSE_02575/FPSE_04549/FPSE_02298/FPSE_07589/FPSE_09168/FPSE_09494/FPSE_05606/FPSE_01892/FPSE_09480/FPSE_05508/FPSE_04464/FPSE_11476/FPSE_06559/FPSE_06451/FPSE_06310/FPSE_07033/FPSE_10595/FPSE_03812/FPSE_03730/FPSE_09499/FPSE_05157/FPSE_10093/FPSE_10168/FPSE_07756/FPS…	-/-/-/-/STE6-1/-/-/-/-/-/-/-/-/-/-/-/-/-/-/-/-/-/-/NPS19/-/-/-/-/-/-/-/ABC2/-/-/-/-/-/-/-/-/-/-/-/-/-/-/-/-/-/-/-/-/-/-/-/-/-/-/-/-/-/-/-/-/-/-/-/-/-/-/-/-/-/-/-/-/-/-/-/-/-/-/-/-/STE6-2/-/-/-/-/-/-/-/-/-/-/-/-/-/-/-/-/-/-/-/-/-/-/-/-/-/-/-/-/-/STE3/-/-/-/-/-/-/-/-/-/-/-/-/-/-/-/-	131	69	FPSE_12004/FPSE_09528/FPSE_10431/FPSE_08297/FPSE_01589/FPSE_07857/FPSE_05542/FPSE_11895/FPSE_02575/FPSE_07589/FPSE_09494/FPSE_05606/FPSE_09480/FPSE_05508/FPSE_04464/FPSE_11476/FPSE_06451/FPSE_06310/FPSE_07033/FPSE_03812/FPSE_03730/FPSE_09499/FPSE_06276/FPSE_04130/FPSE_10849/FPSE_02197/FPSE_02454/FPSE_02262/FPSE_07207/FPSE_09336/FPSE_05712/FPSE_00902/FPSE_02184/FPSE_01364/FPSE_02725/FPSE_11721/FPS…	62	FPSE_06765/FPSE_11047/FPSE_01863/FPSE_06119/FPSE_04549/FPSE_02298/FPSE_09168/FPSE_01892/FPSE_06559/FPSE_10595/FPSE_05157/FPSE_10093/FPSE_10168/FPSE_07756/FPSE_07958/FPSE_02380/FPSE_08109/FPSE_04333/FPSE_05341/FPSE_04782/FPSE_04157/FPSE_05912/FPSE_01407/FPSE_10449/FPSE_10729/FPSE_09154/FPSE_03137/FPSE_06328/FPSE_08714/FPSE_01440/FPSE_07744/FPSE_00308/FPSE_07061/FPSE_09265/FPSE_09080/FPSE_05396/FPS…
CC	GO:0005576	extracellular region	14/262	27/1099	0.00131001825898949	0.0180127510611055	FPSE_03434/FPSE_00365/FPSE_10648/FPSE_10646/FPSE_10647/FPSE_02371/FPSE_04448/FPSE_03138/FPSE_01905/FPSE_10267/FPSE_07423/FPSE_06081/FPSE_08423/FPSE_02362	TOX4/-/TOX3/TOX1/TOX2/-/-/-/-/-/-/-/-/-	14	12	FPSE_03434/FPSE_00365/FPSE_10648/FPSE_10646/FPSE_10647/FPSE_02371/FPSE_04448/FPSE_03138/FPSE_07423/FPSE_06081/FPSE_08423/FPSE_02362	2	FPSE_01905/FPSE_10267
MF	GO:0048037	cofactor binding	205/1346	432/4520	2.85053159238963e-16	5.47302065738809e-14	FPSE_10969/FPSE_10859/FPSE_02873/FPSE_03557/FPSE_00230/FPSE_02497/FPSE_08756/FPSE_08948/FPSE_11372/FPSE_08472/FPSE_04704/FPSE_05495/FPSE_11158/FPSE_02228/FPSE_05377/FPSE_09079/FPSE_08949/FPSE_09337/FPSE_02471/FPSE_04480/FPSE_05060/FPSE_06618/FPSE_07373/FPSE_00697/FPSE_08203/FPSE_05313/FPSE_00537/FPSE_02575/FPSE_04288/FPSE_06660/FPSE_10448/FPSE_05506/FPSE_12101/FPSE_02789/FPSE_09206/FPSE_11978/FPS…	-/-/-/-/-/-/-/-/-/-/-/-/-/-/-/-/-/-/-/-/-/-/-/-/-/-/-/-/-/-/-/-/-/-/-/-/-/-/-/-/-/-/-/-/-/-/-/-/-/-/-/-/-/-/-/-/-/-/-/-/-/-/-/-/-/-/-/-/-/-/-/-/-/-/-/-/-/-/-/-/-/-/-/-/-/-/-/-/-/-/-/-/-/-/-/-/-/-/-/-/-/-/-/-/-/-/-/-/-/-/-/-/-/-/-/-/-/-/aurO/-/-/-/-/-/-/-/-/-/-/-/aurF/-/-/-/-/-/-/-/-/-/-/-/-/-/-/-/-/-/-/-/-/-/-/-/-/-/-/-/-/-/-/-/-/-/-/-/-/-/-/-/-/-/-/-/-/-/-/-/-/-/-/-/-/-/-/-/-/-/-/-/-/-/-/-/-/-/-…	205	150	FPSE_10859/FPSE_03557/FPSE_00230/FPSE_02497/FPSE_08948/FPSE_11372/FPSE_08472/FPSE_04704/FPSE_05495/FPSE_11158/FPSE_09079/FPSE_08949/FPSE_09337/FPSE_02471/FPSE_04480/FPSE_06618/FPSE_07373/FPSE_00697/FPSE_05313/FPSE_00537/FPSE_02575/FPSE_04288/FPSE_06660/FPSE_05506/FPSE_12101/FPSE_02789/FPSE_08061/FPSE_08458/FPSE_08050/FPSE_00540/FPSE_04701/FPSE_07596/FPSE_03448/FPSE_04011/FPSE_00325/FPSE_02481/FPS…	55	FPSE_10969/FPSE_02873/FPSE_08756/FPSE_02228/FPSE_05377/FPSE_05060/FPSE_08203/FPSE_10448/FPSE_09206/FPSE_11978/FPSE_08670/FPSE_08385/FPSE_10487/FPSE_12407/FPSE_05704/FPSE_07346/FPSE_05986/FPSE_00829/FPSE_12344/FPSE_11595/FPSE_00122/FPSE_05124/FPSE_06068/FPSE_11367/FPSE_02485/FPSE_10857/FPSE_01699/FPSE_09886/FPSE_07055/FPSE_12402/FPSE_06720/FPSE_07605/FPSE_01908/FPSE_08801/FPSE_01285/FPSE_00601/FPS…
MF	GO:0016705	oxidoreductase activity, acting on paired donors, with incorporation or reduction of molecular oxygen	81/1346	133/4520	4.31638154181796e-14	4.14372628014524e-12	FPSE_10969/FPSE_08472/FPSE_02228/FPSE_09337/FPSE_02471/FPSE_05060/FPSE_06618/FPSE_07373/FPSE_00697/FPSE_05313/FPSE_00537/FPSE_02575/FPSE_05506/FPSE_02789/FPSE_09206/FPSE_11978/FPSE_08050/FPSE_00540/FPSE_07596/FPSE_00325/FPSE_02481/FPSE_05986/FPSE_11391/FPSE_00380/FPSE_10656/FPSE_12344/FPSE_11595/FPSE_00543/FPSE_06068/FPSE_00539/FPSE_07921/FPSE_08476/FPSE_11367/FPSE_10857/FPSE_09896/FPSE_01496/FPS…	-/-/-/-/-/-/-/-/-/-/-/-/-/-/-/-/-/-/-/-/-/-/-/-/-/-/-/-/-/-/-/-/-/-/-/-/-/-/-/-/-/-/-/-/-/aurF/-/-/-/-/-/-/-/-/-/-/-/-/-/-/-/-/-/-/-/-/-/-/-/-/-/-/-/-/-/-/-/-/-/-/-	81	62	FPSE_08472/FPSE_09337/FPSE_02471/FPSE_06618/FPSE_07373/FPSE_00697/FPSE_05313/FPSE_00537/FPSE_02575/FPSE_05506/FPSE_02789/FPSE_08050/FPSE_00540/FPSE_07596/FPSE_00325/FPSE_02481/FPSE_11391/FPSE_00380/FPSE_10656/FPSE_00543/FPSE_00539/FPSE_07921/FPSE_08476/FPSE_09896/FPSE_01496/FPSE_02459/FPSE_06631/FPSE_07362/FPSE_02139/FPSE_01379/FPSE_01847/novel.354/FPSE_03796/FPSE_11415/FPSE_03753/FPSE_00544/FPSE…	19	FPSE_10969/FPSE_02228/FPSE_05060/FPSE_09206/FPSE_11978/FPSE_05986/FPSE_12344/FPSE_11595/FPSE_06068/FPSE_11367/FPSE_10857/FPSE_07055/FPSE_06720/FPSE_11000/FPSE_00565/FPSE_02063/FPSE_06787/FPSE_08422/FPSE_06019
MF	GO:0020037	heme binding	76/1346	128/4520	1.752088380926e-12	8.4100242284448e-11	FPSE_10969/FPSE_10859/FPSE_02873/FPSE_00230/FPSE_08472/FPSE_02228/FPSE_09079/FPSE_09337/FPSE_05060/FPSE_06618/FPSE_07373/FPSE_00697/FPSE_05313/FPSE_00537/FPSE_05506/FPSE_09206/FPSE_11978/FPSE_08670/FPSE_08050/FPSE_00540/FPSE_07596/FPSE_02481/FPSE_05986/FPSE_11391/FPSE_00380/FPSE_10656/FPSE_12344/FPSE_11595/FPSE_09906/FPSE_00543/FPSE_06068/FPSE_00539/FPSE_07921/FPSE_08476/FPSE_11367/FPSE_01496/FPS…	-/-/-/-/-/-/-/-/-/-/-/-/-/-/-/-/-/-/-/-/-/-/-/-/-/-/-/-/-/-/-/-/-/-/-/-/-/-/-/-/-/-/-/-/-/-/-/-/-/-/-/-/-/-/-/-/-/-/-/-/-/-/-/-/-/-/-/-/-/-/-/-/-/-/-/-	76	56	FPSE_10859/FPSE_00230/FPSE_08472/FPSE_09079/FPSE_09337/FPSE_06618/FPSE_07373/FPSE_00697/FPSE_05313/FPSE_00537/FPSE_05506/FPSE_08050/FPSE_00540/FPSE_07596/FPSE_02481/FPSE_11391/FPSE_00380/FPSE_10656/FPSE_09906/FPSE_00543/FPSE_00539/FPSE_07921/FPSE_08476/FPSE_01496/FPSE_02459/FPSE_06631/FPSE_07362/FPSE_02139/FPSE_01379/FPSE_06668/FPSE_01847/novel.354/FPSE_03753/FPSE_00544/FPSE_11417/FPSE_00109/FPSE…	20	FPSE_10969/FPSE_02873/FPSE_02228/FPSE_05060/FPSE_09206/FPSE_11978/FPSE_08670/FPSE_05986/FPSE_12344/FPSE_11595/FPSE_06068/FPSE_11367/FPSE_06720/FPSE_07605/FPSE_01285/FPSE_07323/FPSE_11000/FPSE_00565/FPSE_08422/FPSE_06019
MF	GO:0046906	tetrapyrrole binding	76/1346	128/4520	1.752088380926e-12	8.4100242284448e-11	FPSE_10969/FPSE_10859/FPSE_02873/FPSE_00230/FPSE_08472/FPSE_02228/FPSE_09079/FPSE_09337/FPSE_05060/FPSE_06618/FPSE_07373/FPSE_00697/FPSE_05313/FPSE_00537/FPSE_05506/FPSE_09206/FPSE_11978/FPSE_08670/FPSE_08050/FPSE_00540/FPSE_07596/FPSE_02481/FPSE_05986/FPSE_11391/FPSE_00380/FPSE_10656/FPSE_12344/FPSE_11595/FPSE_09906/FPSE_00543/FPSE_06068/FPSE_00539/FPSE_07921/FPSE_08476/FPSE_11367/FPSE_01496/FPS…	-/-/-/-/-/-/-/-/-/-/-/-/-/-/-/-/-/-/-/-/-/-/-/-/-/-/-/-/-/-/-/-/-/-/-/-/-/-/-/-/-/-/-/-/-/-/-/-/-/-/-/-/-/-/-/-/-/-/-/-/-/-/-/-/-/-/-/-/-/-/-/-/-/-/-/-	76	56	FPSE_10859/FPSE_00230/FPSE_08472/FPSE_09079/FPSE_09337/FPSE_06618/FPSE_07373/FPSE_00697/FPSE_05313/FPSE_00537/FPSE_05506/FPSE_08050/FPSE_00540/FPSE_07596/FPSE_02481/FPSE_11391/FPSE_00380/FPSE_10656/FPSE_09906/FPSE_00543/FPSE_00539/FPSE_07921/FPSE_08476/FPSE_01496/FPSE_02459/FPSE_06631/FPSE_07362/FPSE_02139/FPSE_01379/FPSE_06668/FPSE_01847/novel.354/FPSE_03753/FPSE_00544/FPSE_11417/FPSE_00109/FPSE…	20	FPSE_10969/FPSE_02873/FPSE_02228/FPSE_05060/FPSE_09206/FPSE_11978/FPSE_08670/FPSE_05986/FPSE_12344/FPSE_11595/FPSE_06068/FPSE_11367/FPSE_06720/FPSE_07605/FPSE_01285/FPSE_07323/FPSE_11000/FPSE_00565/FPSE_08422/FPSE_06019
MF	GO:0005506	iron ion binding	73/1346	129/4520	1.18885154820636e-10	4.56518994511244e-09	FPSE_10969/FPSE_08472/FPSE_02228/FPSE_09337/FPSE_05060/FPSE_06618/FPSE_07373/FPSE_00697/FPSE_05313/FPSE_00537/FPSE_05506/FPSE_09206/FPSE_11978/FPSE_08385/FPSE_08050/FPSE_02726/FPSE_00540/FPSE_07596/FPSE_02481/FPSE_10346/FPSE_05986/FPSE_11391/FPSE_00380/FPSE_10656/FPSE_12344/FPSE_11595/FPSE_11901/FPSE_00543/FPSE_06068/FPSE_00539/FPSE_07921/FPSE_08476/FPSE_11367/FPSE_01496/FPSE_02459/FPSE_06631/FPS…	-/-/-/-/-/-/-/-/-/-/-/-/-/-/-/-/-/-/-/-/-/-/-/-/-/-/-/-/-/-/-/-/-/-/-/-/-/-/-/-/-/-/-/-/-/-/-/-/-/-/-/-/-/-/-/-/-/-/-/-/-/-/-/-/-/-/-/-/-/-/-/-/-	73	55	FPSE_08472/FPSE_09337/FPSE_06618/FPSE_07373/FPSE_00697/FPSE_05313/FPSE_00537/FPSE_05506/FPSE_08050/FPSE_02726/FPSE_00540/FPSE_07596/FPSE_02481/FPSE_11391/FPSE_00380/FPSE_10656/FPSE_11901/FPSE_00543/FPSE_00539/FPSE_07921/FPSE_08476/FPSE_01496/FPSE_02459/FPSE_06631/FPSE_07362/FPSE_02139/FPSE_06368/FPSE_01379/FPSE_01847/novel.354/FPSE_03753/FPSE_00544/FPSE_11417/FPSE_00109/FPSE_07532/FPSE_10338/FPSE…	18	FPSE_10969/FPSE_02228/FPSE_05060/FPSE_09206/FPSE_11978/FPSE_08385/FPSE_10346/FPSE_05986/FPSE_12344/FPSE_11595/FPSE_06068/FPSE_11367/FPSE_06720/FPSE_11000/FPSE_00565/FPSE_08622/FPSE_08422/FPSE_06019
MF	GO:0050662	coenzyme binding	122/1346	277/4520	1.47639549935239e-07	4.72446559792766e-06	FPSE_03557/FPSE_02497/FPSE_08756/FPSE_08948/FPSE_11372/FPSE_04704/FPSE_05495/FPSE_11158/FPSE_05377/FPSE_08949/FPSE_02471/FPSE_04480/FPSE_08203/FPSE_02575/FPSE_04288/FPSE_06660/FPSE_10448/FPSE_12101/FPSE_02789/FPSE_09206/FPSE_08061/FPSE_08050/FPSE_10487/FPSE_12407/FPSE_07346/FPSE_04701/FPSE_03448/FPSE_04011/FPSE_00325/FPSE_10350/FPSE_00774/FPSE_00829/FPSE_08030/FPSE_06845/FPSE_07441/FPSE_00122/FPS…	-/-/-/-/-/-/-/-/-/-/-/-/-/-/-/-/-/-/-/-/-/-/-/-/-/-/-/-/-/-/-/-/-/-/-/-/-/-/-/-/-/-/-/-/-/-/-/-/-/-/-/-/-/-/-/-/-/-/-/-/-/-/-/-/-/-/-/-/aurO/-/-/-/-/-/-/-/-/aurF/-/-/-/-/-/-/-/-/-/-/-/-/-/-/-/-/-/-/-/-/-/-/-/-/-/-/-/-/-/-/-/-/-/-/-/-/-/-/-/-/-/-/-/-	122	89	FPSE_03557/FPSE_02497/FPSE_08948/FPSE_11372/FPSE_04704/FPSE_05495/FPSE_11158/FPSE_08949/FPSE_02471/FPSE_04480/FPSE_02575/FPSE_04288/FPSE_06660/FPSE_12101/FPSE_02789/FPSE_08061/FPSE_08050/FPSE_04701/FPSE_03448/FPSE_04011/FPSE_00325/FPSE_10350/FPSE_00774/FPSE_08030/FPSE_06845/FPSE_07441/FPSE_10909/FPSE_03679/FPSE_01836/FPSE_07208/FPSE_07580/FPSE_08436/FPSE_10226/FPSE_09432/FPSE_09896/FPSE_07545/FPS…	33	FPSE_08756/FPSE_05377/FPSE_08203/FPSE_10448/FPSE_09206/FPSE_10487/FPSE_12407/FPSE_07346/FPSE_00829/FPSE_00122/FPSE_05124/FPSE_02485/FPSE_10857/FPSE_01699/FPSE_09886/FPSE_07055/FPSE_01908/FPSE_08801/FPSE_00601/FPSE_00036/FPSE_07499/FPSE_01898/FPSE_06145/FPSE_11946/FPSE_02889/FPSE_09159/FPSE_02473/FPSE_01700/FPSE_00710/FPSE_10571/FPSE_02063/FPSE_06787/FPSE_02088
MF	GO:0050660	flavin adenine dinucleotide binding	71/1346	145/4520	6.31483760570228e-07	1.73206974327834e-05	FPSE_03557/FPSE_02497/FPSE_08948/FPSE_11372/FPSE_04704/FPSE_05495/FPSE_11158/FPSE_05377/FPSE_08949/FPSE_02471/FPSE_04480/FPSE_02575/FPSE_06660/FPSE_10448/FPSE_12101/FPSE_02789/FPSE_12407/FPSE_07346/FPSE_04701/FPSE_03448/FPSE_04011/FPSE_00325/FPSE_08030/FPSE_06845/FPSE_07441/FPSE_10909/FPSE_05124/FPSE_02485/FPSE_10857/FPSE_08436/FPSE_10226/FPSE_09896/FPSE_09886/FPSE_07055/FPSE_09917/FPSE_02824/FPS…	-/-/-/-/-/-/-/-/-/-/-/-/-/-/-/-/-/-/-/-/-/-/-/-/-/-/-/-/-/-/-/-/-/-/-/-/-/-/-/-/-/aurO/-/-/-/-/aurF/-/-/-/-/-/-/-/-/-/-/-/-/-/-/-/-/-/-/-/-/-/-/-/-	71	50	FPSE_03557/FPSE_02497/FPSE_08948/FPSE_11372/FPSE_04704/FPSE_05495/FPSE_11158/FPSE_08949/FPSE_02471/FPSE_04480/FPSE_02575/FPSE_06660/FPSE_12101/FPSE_02789/FPSE_04701/FPSE_03448/FPSE_04011/FPSE_00325/FPSE_08030/FPSE_06845/FPSE_07441/FPSE_10909/FPSE_08436/FPSE_10226/FPSE_09896/FPSE_09917/FPSE_02824/FPSE_10445/FPSE_03802/FPSE_12425/FPSE_11015/FPSE_03796/FPSE_11415/FPSE_06369/FPSE_08134/FPSE_05483/FPS…	21	FPSE_05377/FPSE_10448/FPSE_12407/FPSE_07346/FPSE_05124/FPSE_02485/FPSE_10857/FPSE_09886/FPSE_07055/FPSE_01908/FPSE_08801/FPSE_00601/FPSE_00036/FPSE_07499/FPSE_01898/FPSE_11946/FPSE_02473/FPSE_01700/FPSE_10571/FPSE_02063/FPSE_06787
MF	GO:0008080	N-acetyltransferase activity	32/1346	58/4520	4.35535609491165e-05	0.0010452854627788	FPSE_11388/FPSE_05557/FPSE_12292/FPSE_06917/FPSE_05017/FPSE_02899/FPSE_06385/FPSE_02075/FPSE_03122/FPSE_08969/FPSE_10922/FPSE_04331/FPSE_10565/FPSE_03251/FPSE_05982/FPSE_01163/FPSE_00100/FPSE_01963/FPSE_04967/FPSE_06807/FPSE_00038/FPSE_10252/FPSE_08053/FPSE_07351/FPSE_10010/FPSE_09699/FPSE_08925/FPSE_09123/FPSE_11046/FPSE_07621/FPSE_01642/FPSE_08040	-/-/-/-/-/-/-/-/-/-/-/-/-/-/-/-/-/-/-/-/-/-/-/-/-/-/-/-/-/-/-/-	32	24	FPSE_05557/FPSE_12292/FPSE_06917/FPSE_05017/FPSE_02899/FPSE_06385/FPSE_02075/FPSE_03122/FPSE_08969/FPSE_10922/FPSE_10565/FPSE_03251/FPSE_05982/FPSE_01163/FPSE_00100/FPSE_06807/FPSE_00038/FPSE_10252/FPSE_08053/FPSE_10010/FPSE_08925/FPSE_09123/FPSE_07621/FPSE_08040	8	FPSE_11388/FPSE_04331/FPSE_01963/FPSE_04967/FPSE_07351/FPSE_09699/FPSE_11046/FPSE_01642
MF	GO:0016410	N-acyltransferase activity	32/1346	59/4520	6.83550787891145e-05	0.00145824168083444	FPSE_11388/FPSE_05557/FPSE_12292/FPSE_06917/FPSE_05017/FPSE_02899/FPSE_06385/FPSE_02075/FPSE_03122/FPSE_08969/FPSE_10922/FPSE_04331/FPSE_10565/FPSE_03251/FPSE_05982/FPSE_01163/FPSE_00100/FPSE_01963/FPSE_04967/FPSE_06807/FPSE_00038/FPSE_10252/FPSE_08053/FPSE_07351/FPSE_10010/FPSE_09699/FPSE_08925/FPSE_09123/FPSE_11046/FPSE_07621/FPSE_01642/FPSE_08040	-/-/-/-/-/-/-/-/-/-/-/-/-/-/-/-/-/-/-/-/-/-/-/-/-/-/-/-/-/-/-/-	32	24	FPSE_05557/FPSE_12292/FPSE_06917/FPSE_05017/FPSE_02899/FPSE_06385/FPSE_02075/FPSE_03122/FPSE_08969/FPSE_10922/FPSE_10565/FPSE_03251/FPSE_05982/FPSE_01163/FPSE_00100/FPSE_06807/FPSE_00038/FPSE_10252/FPSE_08053/FPSE_10010/FPSE_08925/FPSE_09123/FPSE_07621/FPSE_08040	8	FPSE_11388/FPSE_04331/FPSE_01963/FPSE_04967/FPSE_07351/FPSE_09699/FPSE_11046/FPSE_01642
MF	GO:0016407	acetyltransferase activity	34/1346	65/4520	0.000107509099154624	0.00206417470376878	FPSE_11388/FPSE_05557/FPSE_12292/FPSE_06917/FPSE_05017/FPSE_02899/FPSE_06385/FPSE_02075/FPSE_03122/FPSE_08969/FPSE_10922/FPSE_04331/FPSE_10565/FPSE_03251/FPSE_05982/FPSE_01163/FPSE_00100/FPSE_01963/FPSE_04967/FPSE_06807/FPSE_00038/FPSE_10252/FPSE_08053/FPSE_07351/FPSE_10010/FPSE_09699/FPSE_08925/FPSE_09123/FPSE_11046/FPSE_07621/FPSE_08077/FPSE_08123/FPSE_01642/FPSE_08040	-/-/-/-/-/-/-/-/-/-/-/-/-/-/-/-/-/-/-/-/-/-/-/-/-/-/-/-/-/-/-/-/-/-	34	26	FPSE_05557/FPSE_12292/FPSE_06917/FPSE_05017/FPSE_02899/FPSE_06385/FPSE_02075/FPSE_03122/FPSE_08969/FPSE_10922/FPSE_10565/FPSE_03251/FPSE_05982/FPSE_01163/FPSE_00100/FPSE_06807/FPSE_00038/FPSE_10252/FPSE_08053/FPSE_10010/FPSE_08925/FPSE_09123/FPSE_07621/FPSE_08077/FPSE_08123/FPSE_08040	8	FPSE_11388/FPSE_04331/FPSE_01963/FPSE_04967/FPSE_07351/FPSE_09699/FPSE_11046/FPSE_01642
MF	GO:0016746	transferase activity, transferring acyl groups	57/1346	128/4520	0.000239809397545559	0.00418576402988613	FPSE_11388/FPSE_05557/FPSE_12292/FPSE_09187/FPSE_06917/FPSE_03446/FPSE_10183/FPSE_05017/FPSE_02899/FPSE_06385/FPSE_11961/FPSE_02075/FPSE_03122/FPSE_08969/FPSE_09658/FPSE_10922/FPSE_04331/FPSE_10565/FPSE_03251/FPSE_09719/FPSE_05982/FPSE_07914/FPSE_01163/FPSE_00100/FPSE_01963/FPSE_06864/FPSE_04671/FPSE_11363/FPSE_06865/FPSE_04967/FPSE_06807/FPSE_00038/FPSE_10252/FPSE_06985/FPSE_08053/FPSE_08352/FPS…	-/-/-/PKS6/-/PKS3/-/-/-/-/PKS7/-/-/-/-/-/-/-/-/-/-/PKS10/-/-/-/PKS13/PKS8/PKS11/PKS4/-/-/-/-/-/-/-/-/PKS12/-/-/-/-/-/-/PKS14/-/-/-/-/-/-/PKS9/-/PKS15/-/-/-	57	43	FPSE_05557/FPSE_12292/FPSE_09187/FPSE_06917/FPSE_03446/FPSE_05017/FPSE_02899/FPSE_06385/FPSE_11961/FPSE_02075/FPSE_03122/FPSE_08969/FPSE_09658/FPSE_10922/FPSE_10565/FPSE_03251/FPSE_09719/FPSE_05982/FPSE_07914/FPSE_01163/FPSE_00100/FPSE_06864/FPSE_11363/FPSE_06865/FPSE_06807/FPSE_00038/FPSE_10252/FPSE_06985/FPSE_08053/FPSE_08352/FPSE_03799/FPSE_10010/FPSE_05259/FPSE_08925/FPSE_09123/FPSE_07621/FPS…	14	FPSE_11388/FPSE_10183/FPSE_04331/FPSE_01963/FPSE_04671/FPSE_04967/FPSE_07351/FPSE_03815/FPSE_09699/FPSE_05310/FPSE_11046/FPSE_01642/FPSE_06017/FPSE_11049
MF	GO:0016747	transferase activity, transferring acyl groups other than amino-acyl groups	42/1346	90/4520	0.000474415757944594	0.00759065212711351	FPSE_11388/FPSE_05557/FPSE_12292/FPSE_06917/FPSE_10183/FPSE_05017/FPSE_02899/FPSE_06385/FPSE_02075/FPSE_03122/FPSE_08969/FPSE_10922/FPSE_04331/FPSE_10565/FPSE_03251/FPSE_09719/FPSE_05982/FPSE_01163/FPSE_00100/FPSE_01963/FPSE_04967/FPSE_06807/FPSE_00038/FPSE_10252/FPSE_06985/FPSE_08053/FPSE_08352/FPSE_07351/FPSE_03815/FPSE_10010/FPSE_05259/FPSE_09699/FPSE_08925/FPSE_09123/FPSE_11046/FPSE_07621/FPS…	-/-/-/-/-/-/-/-/-/-/-/-/-/-/-/-/-/-/-/-/-/-/-/-/-/-/-/-/-/-/-/-/-/-/-/-/-/-/-/-/-/-	42	31	FPSE_05557/FPSE_12292/FPSE_06917/FPSE_05017/FPSE_02899/FPSE_06385/FPSE_02075/FPSE_03122/FPSE_08969/FPSE_10922/FPSE_10565/FPSE_03251/FPSE_09719/FPSE_05982/FPSE_01163/FPSE_00100/FPSE_06807/FPSE_00038/FPSE_10252/FPSE_06985/FPSE_08053/FPSE_08352/FPSE_10010/FPSE_05259/FPSE_08925/FPSE_09123/FPSE_07621/FPSE_08077/FPSE_08123/FPSE_00387/FPSE_08040	11	FPSE_11388/FPSE_10183/FPSE_04331/FPSE_01963/FPSE_04967/FPSE_07351/FPSE_03815/FPSE_09699/FPSE_11046/FPSE_01642/FPSE_11049
MF	GO:0016709	oxidoreductase activity, acting on paired donors, with incorporation or reduction of molecular oxygen, NAD(P)H as one donor, and incorporation of one atom of oxygen	16/1346	27/4520	0.001338903870866	0.0175961896542545	FPSE_02471/FPSE_02575/FPSE_02789/FPSE_00325/FPSE_10857/FPSE_09896/FPSE_07055/FPSE_03796/FPSE_11415/FPSE_10133/FPSE_01718/FPSE_08417/FPSE_02063/FPSE_06787/FPSE_07998/FPSE_08176	-/-/-/-/-/-/-/aurF/-/-/-/-/-/-/-/-	16	12	FPSE_02471/FPSE_02575/FPSE_02789/FPSE_00325/FPSE_09896/FPSE_03796/FPSE_11415/FPSE_10133/FPSE_01718/FPSE_08417/FPSE_07998/FPSE_08176	4	FPSE_10857/FPSE_07055/FPSE_02063/FPSE_06787
MF	GO:0015399	primary active transmembrane transporter activity	28/1346	57/4520	0.00155799595897045	0.0175961896542545	FPSE_12004/FPSE_04968/FPSE_10431/FPSE_06102/FPSE_05542/FPSE_06119/FPSE_11895/FPSE_09494/FPSE_05606/FPSE_05508/FPSE_11476/FPSE_10595/FPSE_09499/FPSE_06179/FPSE_04130/FPSE_02197/FPSE_02454/FPSE_05712/FPSE_06048/FPSE_00902/FPSE_02488/FPSE_11783/FPSE_00566/FPSE_06011/FPSE_09498/FPSE_11996/FPSE_05678/FPSE_09185	-/-/STE6-1/-/-/-/-/-/-/-/NPS19/-/ABC2/-/-/-/-/-/-/-/-/STE6-2/-/-/-/-/-/-	28	25	FPSE_12004/FPSE_04968/FPSE_10431/FPSE_06102/FPSE_05542/FPSE_11895/FPSE_09494/FPSE_05606/FPSE_05508/FPSE_11476/FPSE_09499/FPSE_06179/FPSE_04130/FPSE_02197/FPSE_02454/FPSE_05712/FPSE_00902/FPSE_02488/FPSE_11783/FPSE_00566/FPSE_06011/FPSE_09498/FPSE_11996/FPSE_05678/FPSE_09185	3	FPSE_06119/FPSE_10595/FPSE_06048
MF	GO:0015405	P-P-bond-hydrolysis-driven transmembrane transporter activity	28/1346	57/4520	0.00155799595897045	0.0175961896542545	FPSE_12004/FPSE_04968/FPSE_10431/FPSE_06102/FPSE_05542/FPSE_06119/FPSE_11895/FPSE_09494/FPSE_05606/FPSE_05508/FPSE_11476/FPSE_10595/FPSE_09499/FPSE_06179/FPSE_04130/FPSE_02197/FPSE_02454/FPSE_05712/FPSE_06048/FPSE_00902/FPSE_02488/FPSE_11783/FPSE_00566/FPSE_06011/FPSE_09498/FPSE_11996/FPSE_05678/FPSE_09185	-/-/STE6-1/-/-/-/-/-/-/-/NPS19/-/ABC2/-/-/-/-/-/-/-/-/STE6-2/-/-/-/-/-/-	28	25	FPSE_12004/FPSE_04968/FPSE_10431/FPSE_06102/FPSE_05542/FPSE_11895/FPSE_09494/FPSE_05606/FPSE_05508/FPSE_11476/FPSE_09499/FPSE_06179/FPSE_04130/FPSE_02197/FPSE_02454/FPSE_05712/FPSE_00902/FPSE_02488/FPSE_11783/FPSE_00566/FPSE_06011/FPSE_09498/FPSE_11996/FPSE_05678/FPSE_09185	3	FPSE_06119/FPSE_10595/FPSE_06048
MF	GO:0042626	ATPase activity, coupled to transmembrane movement of substances	28/1346	57/4520	0.00155799595897045	0.0175961896542545	FPSE_12004/FPSE_04968/FPSE_10431/FPSE_06102/FPSE_05542/FPSE_06119/FPSE_11895/FPSE_09494/FPSE_05606/FPSE_05508/FPSE_11476/FPSE_10595/FPSE_09499/FPSE_06179/FPSE_04130/FPSE_02197/FPSE_02454/FPSE_05712/FPSE_06048/FPSE_00902/FPSE_02488/FPSE_11783/FPSE_00566/FPSE_06011/FPSE_09498/FPSE_11996/FPSE_05678/FPSE_09185	-/-/STE6-1/-/-/-/-/-/-/-/NPS19/-/ABC2/-/-/-/-/-/-/-/-/STE6-2/-/-/-/-/-/-	28	25	FPSE_12004/FPSE_04968/FPSE_10431/FPSE_06102/FPSE_05542/FPSE_11895/FPSE_09494/FPSE_05606/FPSE_05508/FPSE_11476/FPSE_09499/FPSE_06179/FPSE_04130/FPSE_02197/FPSE_02454/FPSE_05712/FPSE_00902/FPSE_02488/FPSE_11783/FPSE_00566/FPSE_06011/FPSE_09498/FPSE_11996/FPSE_05678/FPSE_09185	3	FPSE_06119/FPSE_10595/FPSE_06048
MF	GO:0043492	ATPase activity, coupled to movement of substances	28/1346	57/4520	0.00155799595897045	0.0175961896542545	FPSE_12004/FPSE_04968/FPSE_10431/FPSE_06102/FPSE_05542/FPSE_06119/FPSE_11895/FPSE_09494/FPSE_05606/FPSE_05508/FPSE_11476/FPSE_10595/FPSE_09499/FPSE_06179/FPSE_04130/FPSE_02197/FPSE_02454/FPSE_05712/FPSE_06048/FPSE_00902/FPSE_02488/FPSE_11783/FPSE_00566/FPSE_06011/FPSE_09498/FPSE_11996/FPSE_05678/FPSE_09185	-/-/STE6-1/-/-/-/-/-/-/-/NPS19/-/ABC2/-/-/-/-/-/-/-/-/STE6-2/-/-/-/-/-/-	28	25	FPSE_12004/FPSE_04968/FPSE_10431/FPSE_06102/FPSE_05542/FPSE_11895/FPSE_09494/FPSE_05606/FPSE_05508/FPSE_11476/FPSE_09499/FPSE_06179/FPSE_04130/FPSE_02197/FPSE_02454/FPSE_05712/FPSE_00902/FPSE_02488/FPSE_11783/FPSE_00566/FPSE_06011/FPSE_09498/FPSE_11996/FPSE_05678/FPSE_09185	3	FPSE_06119/FPSE_10595/FPSE_06048
MF	GO:0004499	N,N-dimethylaniline monooxygenase activity	15/1346	26/4520	0.00273505787949488	0.0291739507146121	FPSE_02471/FPSE_02789/FPSE_00325/FPSE_10857/FPSE_09896/FPSE_07055/FPSE_03796/FPSE_11415/FPSE_10133/FPSE_01718/FPSE_08417/FPSE_02063/FPSE_06787/FPSE_07998/FPSE_08176	-/-/-/-/-/-/aurF/-/-/-/-/-/-/-/-	15	11	FPSE_02471/FPSE_02789/FPSE_00325/FPSE_09896/FPSE_03796/FPSE_11415/FPSE_10133/FPSE_01718/FPSE_08417/FPSE_07998/FPSE_08176	4	FPSE_10857/FPSE_07055/FPSE_02063/FPSE_06787
MF	GO:0004497	monooxygenase activity	18/1346	34/4520	0.00382816358304806	0.0367503703972614	FPSE_02471/FPSE_02575/FPSE_02789/FPSE_00492/FPSE_00325/FPSE_10857/FPSE_09896/FPSE_07055/FPSE_03796/FPSE_11415/FPSE_06497/FPSE_10133/FPSE_01718/FPSE_08417/FPSE_02063/FPSE_06787/FPSE_07998/FPSE_08176	-/-/-/-/-/-/-/-/aurF/-/-/-/-/-/-/-/-/-	18	14	FPSE_02471/FPSE_02575/FPSE_02789/FPSE_00492/FPSE_00325/FPSE_09896/FPSE_03796/FPSE_11415/FPSE_06497/FPSE_10133/FPSE_01718/FPSE_08417/FPSE_07998/FPSE_08176	4	FPSE_10857/FPSE_07055/FPSE_02063/FPSE_06787
MF	GO:0050661	NADP binding	18/1346	34/4520	0.00382816358304806	0.0367503703972614	FPSE_02471/FPSE_02789/FPSE_00325/FPSE_07208/FPSE_10857/FPSE_09896/FPSE_07055/FPSE_09068/FPSE_03796/FPSE_11415/FPSE_10133/FPSE_01718/FPSE_09159/FPSE_08417/FPSE_02063/FPSE_06787/FPSE_07998/FPSE_08176	-/-/-/-/-/-/-/-/aurF/-/-/-/-/-/-/-/-/-	18	13	FPSE_02471/FPSE_02789/FPSE_00325/FPSE_07208/FPSE_09896/FPSE_09068/FPSE_03796/FPSE_11415/FPSE_10133/FPSE_01718/FPSE_08417/FPSE_07998/FPSE_08176	5	FPSE_10857/FPSE_07055/FPSE_09159/FPSE_02063/FPSE_06787
MF	GO:0071949	FAD binding	19/1346	37/4520	0.00466539614540608	0.0426550504722841	FPSE_08949/FPSE_04480/FPSE_06660/FPSE_12101/FPSE_07346/FPSE_04701/FPSE_03448/FPSE_08030/FPSE_10226/FPSE_02824/FPSE_00036/FPSE_06369/FPSE_08134/FPSE_10642/FPSE_03471/FPSE_06390/FPSE_10571/FPSE_06097/FPSE_03748	-/-/-/-/-/-/-/-/-/-/-/-/-/-/-/-/-/-/-	19	16	FPSE_08949/FPSE_04480/FPSE_06660/FPSE_12101/FPSE_04701/FPSE_03448/FPSE_08030/FPSE_10226/FPSE_02824/FPSE_06369/FPSE_08134/FPSE_10642/FPSE_03471/FPSE_06390/FPSE_06097/FPSE_03748	3	FPSE_07346/FPSE_00036/FPSE_10571
MF	GO:0008236	serine-type peptidase activity	26/1346	56/4520	0.00597304359625969	0.0498619291513852	FPSE_09637/FPSE_07448/FPSE_03257/FPSE_04169/FPSE_09346/FPSE_03477/FPSE_12114/FPSE_09223/FPSE_01682/FPSE_01160/FPSE_03226/FPSE_10938/FPSE_10439/FPSE_07509/FPSE_02263/FPSE_02153/FPSE_02500/FPSE_01940/FPSE_00116/FPSE_02361/FPSE_07510/FPSE_03460/FPSE_03311/FPSE_07490/FPSE_04660/FPSE_02444	-/-/-/-/-/-/-/-/-/-/-/-/-/-/-/-/-/-/-/-/-/-/-/-/-/-	26	13	FPSE_09637/FPSE_07448/FPSE_03257/FPSE_04169/FPSE_03477/FPSE_12114/FPSE_09223/FPSE_01160/FPSE_10938/FPSE_07509/FPSE_07510/FPSE_03460/FPSE_07490	13	FPSE_09346/FPSE_01682/FPSE_03226/FPSE_10439/FPSE_02263/FPSE_02153/FPSE_02500/FPSE_01940/FPSE_00116/FPSE_02361/FPSE_03311/FPSE_04660/FPSE_02444
MF	GO:0017171	serine hydrolase activity	26/1346	56/4520	0.00597304359625969	0.0498619291513852	FPSE_09637/FPSE_07448/FPSE_03257/FPSE_04169/FPSE_09346/FPSE_03477/FPSE_12114/FPSE_09223/FPSE_01682/FPSE_01160/FPSE_03226/FPSE_10938/FPSE_10439/FPSE_07509/FPSE_02263/FPSE_02153/FPSE_02500/FPSE_01940/FPSE_00116/FPSE_02361/FPSE_07510/FPSE_03460/FPSE_03311/FPSE_07490/FPSE_04660/FPSE_02444	-/-/-/-/-/-/-/-/-/-/-/-/-/-/-/-/-/-/-/-/-/-/-/-/-/-	26	13	FPSE_09637/FPSE_07448/FPSE_03257/FPSE_04169/FPSE_03477/FPSE_12114/FPSE_09223/FPSE_01160/FPSE_10938/FPSE_07509/FPSE_07510/FPSE_03460/FPSE_07490	13	FPSE_09346/FPSE_01682/FPSE_03226/FPSE_10439/FPSE_02263/FPSE_02153/FPSE_02500/FPSE_01940/FPSE_00116/FPSE_02361/FPSE_03311/FPSE_04660/FPSE_02444
