# Supplementary material
Source: MDPI journal article supplement (https://www.mdpi.com/2071-1050/15/14/11401)
Supplement: s1 [file s1 › Table S4.xls]

KEGGID	Description	GeneRatio	BgRatio	pvalue	padj	geneID	geneName	keggID	Count	Up	Up_Gene_id	Down	Down_Gene_id
fpu01110	Biosynthesis of secondary metabolites	130/438	479/2308	4.9177377979623e-07	4.57349615210494e-05	FPSE_00230/FPSE_11931/FPSE_03901/FPSE_07625/FPSE_02077/FPSE_09737/FPSE_09079/FPSE_10040/FPSE_05158/FPSE_03067/FPSE_03117/FPSE_08809/FPSE_08240/FPSE_11218/FPSE_08203/FPSE_06373/FPSE_02575/FPSE_03095/FPSE_12229/FPSE_06859/FPSE_08392/FPSE_03969/FPSE_08458/FPSE_02161/FPSE_10253/FPSE_10929/FPSE_10487/FPSE_00084/FPSE_04205/FPSE_07271/FPSE_02160/FPSE_05704/FPSE_01629/FPSE_10350/FPSE_10346/FPSE_09658/FPS…	-/-/-/-/-/-/-/-/-/-/-/-/-/-/-/-/-/-/-/-/-/-/-/-/-/-/-/-/-/-/-/-/-/-/-/-/-/-/-/-/-/-/-/-/-/-/-/-/-/-/-/-/-/-/-/-/-/-/-/-/-/-/-/-/-/-/-/-/-/-/-/-/-/-/-/-/-/-/-/-/-/-/-/MSY1/-/-/-/-/-/-/-/-/-/-/-/-/-/-/-/-/-/-/-/-/-/-/-/-/-/-/-/-/-/-/-/-/-/-/-/-/-/-/-/-/-/-/-/-/-/-	fpu:FPSE_00230/fpu:FPSE_11931/fpu:FPSE_03901/fpu:FPSE_07625/fpu:FPSE_02077/fpu:FPSE_09737/fpu:FPSE_09079/fpu:FPSE_10040/fpu:FPSE_05158/fpu:FPSE_03067/fpu:FPSE_03117/fpu:FPSE_08809/fpu:FPSE_08240/fpu:FPSE_11218/fpu:FPSE_08203/fpu:FPSE_06373/fpu:FPSE_02575/fpu:FPSE_03095/fpu:FPSE_12229/fpu:FPSE_06859/fpu:FPSE_08392/fpu:FPSE_03969/fpu:FPSE_08458/fpu:FPSE_02161/fpu:FPSE_10253/fpu:FPSE_10929/fpu:FPSE_…	130	92	FPSE_00230/FPSE_02077/FPSE_09737/FPSE_09079/FPSE_03067/FPSE_08240/FPSE_11218/FPSE_06373/FPSE_02575/FPSE_06859/FPSE_08392/FPSE_03969/FPSE_08458/FPSE_02161/FPSE_10253/FPSE_10929/FPSE_00084/FPSE_04205/FPSE_07271/FPSE_02160/FPSE_01629/FPSE_10350/FPSE_09658/FPSE_05092/FPSE_05631/FPSE_01838/FPSE_08317/FPSE_04213/FPSE_11881/FPSE_09719/FPSE_07804/FPSE_06298/FPSE_01836/FPSE_02447/FPSE_03821/FPSE_06044/FPS…	38	FPSE_11931/FPSE_03901/FPSE_07625/FPSE_10040/FPSE_05158/FPSE_03117/FPSE_08809/FPSE_08203/FPSE_03095/FPSE_12229/FPSE_10487/FPSE_05704/FPSE_10346/FPSE_04540/FPSE_04157/FPSE_10398/FPSE_01648/FPSE_10292/FPSE_07744/FPSE_04608/FPSE_05743/FPSE_08625/FPSE_01649/FPSE_03675/FPSE_03643/FPSE_06829/FPSE_00036/FPSE_08554/FPSE_09024/FPSE_06407/FPSE_11326/FPSE_02889/FPSE_04575/FPSE_05397/FPSE_02903/FPSE_08622/FPS…
fpu00100	Steroid biosynthesis	18/438	31/2308	1.32370667277493e-06	6.15523602840343e-05	FPSE_03901/FPSE_02575/FPSE_12229/FPSE_01629/FPSE_10346/FPSE_05092/FPSE_08317/FPSE_01648/FPSE_10292/FPSE_06044/FPSE_01496/FPSE_02459/FPSE_10216/FPSE_06043/FPSE_01847/FPSE_10942/FPSE_00109/FPSE_08622	-/-/-/-/-/-/-/-/-/-/-/-/-/-/-/-/-/-	fpu:FPSE_03901/fpu:FPSE_02575/fpu:FPSE_12229/fpu:FPSE_01629/fpu:FPSE_10346/fpu:FPSE_05092/fpu:FPSE_08317/fpu:FPSE_01648/fpu:FPSE_10292/fpu:FPSE_06044/fpu:FPSE_01496/fpu:FPSE_02459/fpu:FPSE_10216/fpu:FPSE_06043/fpu:FPSE_01847/fpu:FPSE_10942/fpu:FPSE_00109/fpu:FPSE_08622	18	11	FPSE_02575/FPSE_01629/FPSE_05092/FPSE_08317/FPSE_06044/FPSE_01496/FPSE_02459/FPSE_10216/FPSE_06043/FPSE_01847/FPSE_00109	7	FPSE_03901/FPSE_12229/FPSE_10346/FPSE_01648/FPSE_10292/FPSE_10942/FPSE_08622
fpu02010	ABC transporters	17/438	29/2308	2.20086231192266e-06	6.82267316696024e-05	FPSE_10431/FPSE_06102/FPSE_05542/FPSE_11895/FPSE_09494/FPSE_05606/FPSE_05508/FPSE_04130/FPSE_02454/FPSE_08989/FPSE_05712/FPSE_11783/FPSE_00566/FPSE_06011/FPSE_11996/FPSE_05678/FPSE_09185	STE6-1/-/-/-/-/-/-/-/-/-/-/STE6-2/-/-/-/-/-	fpu:FPSE_10431/fpu:FPSE_06102/fpu:FPSE_05542/fpu:FPSE_11895/fpu:FPSE_09494/fpu:FPSE_05606/fpu:FPSE_05508/fpu:FPSE_04130/fpu:FPSE_02454/fpu:FPSE_08989/fpu:FPSE_05712/fpu:FPSE_11783/fpu:FPSE_00566/fpu:FPSE_06011/fpu:FPSE_11996/fpu:FPSE_05678/fpu:FPSE_09185	17	17	FPSE_10431/FPSE_06102/FPSE_05542/FPSE_11895/FPSE_09494/FPSE_05606/FPSE_05508/FPSE_04130/FPSE_02454/FPSE_08989/FPSE_05712/FPSE_11783/FPSE_00566/FPSE_06011/FPSE_11996/FPSE_05678/FPSE_09185	0
fpu00350	Tyrosine metabolism	23/438	60/2308	0.000309521342112253	0.00719637120410989	FPSE_08458/FPSE_05704/FPSE_10398/FPSE_05410/FPSE_05743/FPSE_11583/FPSE_03318/FPSE_06879/FPSE_09331/FPSE_02148/FPSE_00585/FPSE_02889/FPSE_03836/FPSE_07361/FPSE_04575/FPSE_09325/FPSE_07783/novel.642/FPSE_04043/FPSE_02903/FPSE_07802/FPSE_03736/FPSE_06597	-/-/-/-/-/-/-/-/-/-/-/-/-/-/-/-/-/-/-/-/-/-/-	fpu:FPSE_08458/fpu:FPSE_05704/fpu:FPSE_10398/fpu:FPSE_05410/fpu:FPSE_05743/fpu:FPSE_11583/fpu:FPSE_03318/fpu:FPSE_06879/fpu:FPSE_09331/fpu:FPSE_02148/fpu:FPSE_00585/fpu:FPSE_02889/fpu:FPSE_03836/fpu:FPSE_07361/fpu:FPSE_04575/fpu:FPSE_09325/fpu:FPSE_07783/fpu:FPSE_08970/fpu:FPSE_04043/fpu:FPSE_02903/fpu:FPSE_07802/fpu:FPSE_03736/fpu:FPSE_06597	23	16	FPSE_08458/FPSE_05410/FPSE_11583/FPSE_03318/FPSE_06879/FPSE_09331/FPSE_02148/FPSE_00585/FPSE_03836/FPSE_07361/FPSE_09325/FPSE_07783/novel.642/FPSE_04043/FPSE_07802/FPSE_06597	7	FPSE_05704/FPSE_10398/FPSE_05743/FPSE_02889/FPSE_04575/FPSE_02903/FPSE_03736
fpu00270	Cysteine and methionine metabolism	21/438	56/2308	0.000796167990270958	0.0140593852211984	FPSE_09737/FPSE_11218/FPSE_08203/FPSE_10487/FPSE_00084/FPSE_07271/FPSE_00385/FPSE_11881/FPSE_07804/FPSE_06298/FPSE_01836/FPSE_09432/FPSE_08625/FPSE_01713/FPSE_06206/FPSE_09331/FPSE_10153/FPSE_02148/FPSE_02889/FPSE_07802/FPSE_11567	-/-/-/-/-/-/-/-/-/-/-/-/-/-/-/-/MSY1/-/-/-/-	fpu:FPSE_09737/fpu:FPSE_11218/fpu:FPSE_08203/fpu:FPSE_10487/fpu:FPSE_00084/fpu:FPSE_07271/fpu:FPSE_00385/fpu:FPSE_11881/fpu:FPSE_07804/fpu:FPSE_06298/fpu:FPSE_01836/fpu:FPSE_09432/fpu:FPSE_08625/fpu:FPSE_01713/fpu:FPSE_06206/fpu:FPSE_09331/fpu:FPSE_10153/fpu:FPSE_02148/fpu:FPSE_02889/fpu:FPSE_07802/fpu:FPSE_11567	21	17	FPSE_09737/FPSE_11218/FPSE_00084/FPSE_07271/FPSE_00385/FPSE_11881/FPSE_07804/FPSE_06298/FPSE_01836/FPSE_09432/FPSE_01713/FPSE_06206/FPSE_09331/FPSE_10153/FPSE_02148/FPSE_07802/FPSE_11567	4	FPSE_08203/FPSE_10487/FPSE_08625/FPSE_02889
fpu00260	Glycine, serine and threonine metabolism	23/438	64/2308	0.000907057111045057	0.0140593852211984	novel.142/FPSE_02077/FPSE_11218/FPSE_06373/FPSE_08458/FPSE_10487/FPSE_07271/FPSE_05704/FPSE_05631/novel.141/FPSE_01836/FPSE_09432/FPSE_04663/FPSE_03318/FPSE_01713/FPSE_01721/FPSE_08388/FPSE_08801/FPSE_01887/FPSE_03819/FPSE_06216/FPSE_06679/FPSE_02473	-/-/-/-/-/-/-/-/-/-/-/-/-/-/-/-/-/-/-/-/-/-/-	fpu:FPSE_01721/fpu:FPSE_02077/fpu:FPSE_11218/fpu:FPSE_06373/fpu:FPSE_08458/fpu:FPSE_10487/fpu:FPSE_07271/fpu:FPSE_05704/fpu:FPSE_05631/fpu:FPSE_01721/fpu:FPSE_01836/fpu:FPSE_09432/fpu:FPSE_04663/fpu:FPSE_03318/fpu:FPSE_01713/fpu:FPSE_01721/fpu:FPSE_08388/fpu:FPSE_08801/fpu:FPSE_01887/fpu:FPSE_03819/fpu:FPSE_06216/fpu:FPSE_06679/fpu:FPSE_02473	23	16	novel.142/FPSE_02077/FPSE_11218/FPSE_06373/FPSE_08458/FPSE_07271/FPSE_05631/novel.141/FPSE_01836/FPSE_09432/FPSE_03318/FPSE_01713/FPSE_01887/FPSE_03819/FPSE_06216/FPSE_06679	7	FPSE_10487/FPSE_05704/FPSE_04663/FPSE_01721/FPSE_08388/FPSE_08801/FPSE_02473
fpu00380	Tryptophan metabolism	19/438	51/2308	0.00154305707385451	0.0205006154097814	FPSE_00230/FPSE_07625/FPSE_09079/FPSE_06859/FPSE_09206/FPSE_08050/FPSE_02726/FPSE_00774/FPSE_09719/FPSE_10228/FPSE_02447/FPSE_04049/FPSE_07323/FPSE_05311/FPSE_10135/FPSE_07361/FPSE_06667/FPSE_07830/FPSE_05720	-/-/-/-/-/-/-/-/-/-/-/-/-/-/-/-/-/-/-	fpu:FPSE_00230/fpu:FPSE_07625/fpu:FPSE_09079/fpu:FPSE_06859/fpu:FPSE_09206/fpu:FPSE_08050/fpu:FPSE_02726/fpu:FPSE_00774/fpu:FPSE_09719/fpu:FPSE_10228/fpu:FPSE_02447/fpu:FPSE_04049/fpu:FPSE_07323/fpu:FPSE_05311/fpu:FPSE_10135/fpu:FPSE_07361/fpu:FPSE_06667/fpu:FPSE_07830/fpu:FPSE_05720	19	14	FPSE_00230/FPSE_09079/FPSE_06859/FPSE_08050/FPSE_02726/FPSE_00774/FPSE_09719/FPSE_10228/FPSE_02447/FPSE_05311/FPSE_07361/FPSE_06667/FPSE_07830/FPSE_05720	5	FPSE_07625/FPSE_09206/FPSE_04049/FPSE_07323/FPSE_10135
fpu00360	Phenylalanine metabolism	16/438	42/2308	0.00275921685294694	0.0320758959155082	FPSE_08458/FPSE_05704/FPSE_10398/FPSE_10228/FPSE_03318/FPSE_06879/FPSE_09331/FPSE_02148/FPSE_05311/FPSE_00585/FPSE_02889/FPSE_09706/FPSE_07361/FPSE_07802/FPSE_06597/FPSE_05720	-/-/-/-/-/-/-/-/-/-/-/-/-/-/-/-	fpu:FPSE_08458/fpu:FPSE_05704/fpu:FPSE_10398/fpu:FPSE_10228/fpu:FPSE_03318/fpu:FPSE_06879/fpu:FPSE_09331/fpu:FPSE_02148/fpu:FPSE_05311/fpu:FPSE_00585/fpu:FPSE_02889/fpu:FPSE_09706/fpu:FPSE_07361/fpu:FPSE_07802/fpu:FPSE_06597/fpu:FPSE_05720	16	13	FPSE_08458/FPSE_10228/FPSE_03318/FPSE_06879/FPSE_09331/FPSE_02148/FPSE_05311/FPSE_00585/FPSE_09706/FPSE_07361/FPSE_07802/FPSE_06597/FPSE_05720	3	FPSE_05704/FPSE_10398/FPSE_02889
fpu00330	Arginine and proline metabolism	19/438	54/2308	0.00332041722347534	0.0343109779759119	FPSE_03347/FPSE_06859/FPSE_10228/FPSE_02447/FPSE_03821/FPSE_02157/FPSE_03487/FPSE_01023/FPSE_09331/FPSE_02148/FPSE_05311/FPSE_02889/FPSE_04939/FPSE_11038/FPSE_08159/FPSE_01888/FPSE_07802/FPSE_00219/FPSE_05720	-/-/-/-/-/-/-/-/-/-/-/-/-/-/-/-/-/-/-	fpu:FPSE_03347/fpu:FPSE_06859/fpu:FPSE_10228/fpu:FPSE_02447/fpu:FPSE_03821/fpu:FPSE_02157/fpu:FPSE_03487/fpu:FPSE_01023/fpu:FPSE_09331/fpu:FPSE_02148/fpu:FPSE_05311/fpu:FPSE_02889/fpu:FPSE_04939/fpu:FPSE_11038/fpu:FPSE_08159/fpu:FPSE_01888/fpu:FPSE_07802/fpu:FPSE_00219/fpu:FPSE_05720	19	15	FPSE_03347/FPSE_06859/FPSE_10228/FPSE_02447/FPSE_03821/FPSE_02157/FPSE_09331/FPSE_02148/FPSE_05311/FPSE_11038/FPSE_08159/FPSE_01888/FPSE_07802/FPSE_00219/FPSE_05720	4	FPSE_03487/FPSE_01023/FPSE_02889/FPSE_04939
fpu00460	Cyanoamino acid metabolism	14/438	36/2308	0.00403854011931963	0.0375584231096725	FPSE_08392/FPSE_03969/FPSE_09845/FPSE_10929/FPSE_04608/FPSE_01649/FPSE_06829/FPSE_00340/FPSE_08171/FPSE_10135/FPSE_00454/FPSE_02085/FPSE_05480/FPSE_07830	-/-/-/-/-/-/-/-/-/-/-/-/-/-	fpu:FPSE_08392/fpu:FPSE_03969/fpu:FPSE_09845/fpu:FPSE_10929/fpu:FPSE_04608/fpu:FPSE_01649/fpu:FPSE_06829/fpu:FPSE_00340/fpu:FPSE_08171/fpu:FPSE_10135/fpu:FPSE_00454/fpu:FPSE_02085/fpu:FPSE_05480/fpu:FPSE_07830	14	9	FPSE_08392/FPSE_03969/FPSE_10929/FPSE_00340/FPSE_08171/FPSE_00454/FPSE_02085/FPSE_05480/FPSE_07830	5	FPSE_09845/FPSE_04608/FPSE_01649/FPSE_06829/FPSE_10135
fpu00410	beta-Alanine metabolism	13/438	33/2308	0.00487143781466119	0.0411857924330446	FPSE_07625/FPSE_06859/FPSE_08458/FPSE_05704/FPSE_10398/FPSE_02447/FPSE_07208/FPSE_03318/FPSE_03487/FPSE_06879/FPSE_06145/FPSE_00585/FPSE_07528	-/-/-/-/-/-/-/-/-/-/-/-/-	fpu:FPSE_07625/fpu:FPSE_06859/fpu:FPSE_08458/fpu:FPSE_05704/fpu:FPSE_10398/fpu:FPSE_02447/fpu:FPSE_07208/fpu:FPSE_03318/fpu:FPSE_03487/fpu:FPSE_06879/fpu:FPSE_06145/fpu:FPSE_00585/fpu:FPSE_07528	13	8	FPSE_06859/FPSE_08458/FPSE_02447/FPSE_07208/FPSE_03318/FPSE_06879/FPSE_00585/FPSE_07528	5	FPSE_07625/FPSE_05704/FPSE_10398/FPSE_03487/FPSE_06145
fpu00520	Amino sugar and nucleotide sugar metabolism	21/438	64/2308	0.00534429594169346	0.0414182935481243	FPSE_08756/FPSE_08023/FPSE_05536/FPSE_03981/FPSE_10040/FPSE_00419/FPSE_06052/FPSE_05963/FPSE_12224/FPSE_09070/FPSE_07158/FPSE_01706/FPSE_02180/FPSE_09013/FPSE_10295/FPSE_01444/FPSE_00711/FPSE_00564/FPSE_10119/FPSE_05497/FPSE_12150	-/-/-/-/-/-/-/-/-/-/-/-/-/-/-/-/-/-/-/-/-	fpu:FPSE_08756/fpu:FPSE_08023/fpu:FPSE_05536/fpu:FPSE_03981/fpu:FPSE_10040/fpu:FPSE_00419/fpu:FPSE_06052/fpu:FPSE_05963/fpu:FPSE_12224/fpu:FPSE_09070/fpu:FPSE_07158/fpu:FPSE_01706/fpu:FPSE_02180/fpu:FPSE_09013/fpu:FPSE_10295/fpu:FPSE_01444/fpu:FPSE_00711/fpu:FPSE_00564/fpu:FPSE_10119/fpu:FPSE_05497/fpu:FPSE_12150	21	5	FPSE_03981/FPSE_06052/FPSE_12224/FPSE_07158/FPSE_12150	16	FPSE_08756/FPSE_08023/FPSE_05536/FPSE_10040/FPSE_00419/FPSE_05963/FPSE_09070/FPSE_01706/FPSE_02180/FPSE_09013/FPSE_10295/FPSE_01444/FPSE_00711/FPSE_00564/FPSE_10119/FPSE_05497
fpu00500	Starch and sucrose metabolism	21/438	65/2308	0.00653681870343806	0.04676339533998	FPSE_12168/FPSE_04433/FPSE_05158/FPSE_08392/FPSE_03969/FPSE_10929/FPSE_00991/FPSE_07368/FPSE_08193/FPSE_05690/FPSE_01649/FPSE_03138/FPSE_04834/FPSE_06829/FPSE_06584/FPSE_00340/FPSE_08171/FPSE_05397/FPSE_02085/FPSE_05480/FPSE_03784	-/-/-/-/-/-/-/-/-/-/-/-/-/-/-/-/-/-/-/-/-	fpu:FPSE_12168/fpu:FPSE_04433/fpu:FPSE_05158/fpu:FPSE_08392/fpu:FPSE_03969/fpu:FPSE_10929/fpu:FPSE_00991/fpu:FPSE_07368/fpu:FPSE_08193/fpu:FPSE_05690/fpu:FPSE_01649/fpu:FPSE_03138/fpu:FPSE_04834/fpu:FPSE_06829/fpu:FPSE_06584/fpu:FPSE_00340/fpu:FPSE_08171/fpu:FPSE_05397/fpu:FPSE_02085/fpu:FPSE_05480/fpu:FPSE_03784	21	15	FPSE_04433/FPSE_08392/FPSE_03969/FPSE_10929/FPSE_07368/FPSE_08193/FPSE_05690/FPSE_03138/FPSE_04834/FPSE_06584/FPSE_00340/FPSE_08171/FPSE_02085/FPSE_05480/FPSE_03784	6	FPSE_12168/FPSE_05158/FPSE_00991/FPSE_01649/FPSE_06829/FPSE_05397
